# Supplementary material
Source: publisher figshare collection journal article supplement (https://gsajournals.figshare.com/ndownloader/files/22150407)
Supplement: Supplementary file 1 [file 22150407]

## Sheet: All Proteins
g1.t1	MLHQLDRIVIDECHVLLELTQDWRPDLLKMVEMTEKGTQTVTICRDERTTRTNIAYQVLEYTRGTLEKVLIKLVAAKRSRYGPKAQIIVYCPTVDETKRLAKLLQCSAYYRQIGLDKEKARMVRSFTLGIEKLCTATNMLGLRLDAAGVRVVIHVAMCPLLLQYVQESGWAGRTGLDSKSIVIRACYVTKEGRVEKALGYKLERPAKEFMTVESCRRIAIDKHMDGRQNRQQCEMGESKCDLCERHPGSTKRQAVEEEQEEPEETQADTAAVAAEEQRRCIERAIVVKEQRVKIQQQ
g2.t1	MNRMLRLRTLARTQAKRRNTPGIVSWDGDRLLIDKQSFSLADLWSMVKGLCETVRLQLFKDVLLLDLDERGCVQPGTTPLLEVSVDKLVDQPAELATGWSFLKHPDNQLDRWQDWLLDQVLDEAPLRERFIRGIDSTQRPERTLWRDDAVARYMKGVRQFKEGLFTLVHMSGGGPGRGTEITSIQCENSADGVGYRGVFVEGGLVSFTTTYHKGYSFSKRVKTIHRYVPWEVGELVVYFLGLGRPFIDDLQMLHNGVARPTAFIWEPEPEEQWGDESDSEESDDGDEYGEADREKARSANPDGYWGTDRIRRVLREQTFQYMNTALGTRAWRHAYPAIHRELARDGQARDWLEVLYWNKAPAKSNAQALQSSHSLKTEEGNYGRSMMESPFQTMAEREE…
g3.t1	MELFAQLFKHWPELRVVVCKPCATAIPPAQIVTHLKERHPKVTVATRKSLAAAVRALPNLAWSPGDVRVPRPAKEPVFGLKSREDGLVNEQKRGGDIRQKSKHSRNRVWRDSQSCQRLFRAVGWPAYVAVETSVGAATLADISQRVKADRQHQREERKAAAAQDKIKEGIRSQADPWLELTEWVPHLQGIPRAALLRAKQLAGGEVDARGKEEVAFNNTGLRDVCKAMERLIRKAFDSSRAEVVGRLALEIIERREAGAESNERPFYARHRVGTIKKYSQKLVSILCYLWRTYDQVERPPYKLTSTQDALLVSLQQIARSDDAAKKEKLEERCLRF
g4.t1	MHWLAALDSAAERFDGGRRSFPLASEADFVRNYAYEPPNEDYKKLFFCQATISRSQRDPGARPHSAGWLIPTRDDASVCKPVFIAHSVLSAIWLLRETLADDVLPDNIWDRLVCAAESLAEDGMEEPPSAQKPFASPSQQASAPPLQQKKRPHLSAPAPTPKRAQTTTDETHPASPQLSQPSEPDEQLKDSPLHITTISNNNRRAEQKRSRTLATSRAKKRLALGLVAPGDKAPLPEQAAYTSIVQKDKSVVAWIIKQPVSDDTDFYSSTQTPYLTACTLLEKARVLGNQSSRYHAAQFLQAWRERGSPFRGGGELAGSQSRTGAGAKRLQLLSVRNDADRDFCFAWNMCTRYEAELAAVYIESRWASALLGQAYSNKIAQIWHNDFVSSNDRTRNQYR…
g5.t1	MGYEGGESWTFGDKLPGWLVYPERVESYRRGKLHPVKIGDIFQADRYQYKIVRKLGHGSFSTVWLAECTSDPRYVAIKILSSDASSTSKEVQINRIIRANATARGHIVTLLDSFKHDGPNGEHECLVFEPMGPAVAACYDPDYNPIHAWQAKSICKQLLTALKCLHDLGIAHSDSNPGNLLLSLTIPIQQPSSGGKCWSTGVKGNPQIPERIYENRPLTEFWDREVPVELKLSDLGAAFFSNDPPATPVIAIGLRAPEVVLQSSFDHRIDIWSFGCLLFELFTRAPLFVMPPFNLARTNTDHLHGTSNDNNLPQEGDGDFLPGADRNDQALQENNDDHLLQMIHALGPLPPAMFERWPRGKRYFNKDGEQIRSDVGESEIPSDILVGDTLEQRFQRRKP…
g6.t1	MASSLGKDDSIIIVGAGVFGLSLAYELASARGYTEITVLDRSLPPVPDGSSVDISRIIRSEYADEVYSRMAKEAMVGWRTDYSQHYHEDGFVLLAEGDNHPYVEKILEYGNKDPNTRARAYKVKETPSAIKQAYPAVHAKIEGMSAVHNPEGGWADAAGSVNSLAERASRIGVNFVTGRRGTVVGFEFNKSLTQVTGVRVRSGPSLRASRIVLATGAWTNTLVPNIGHAMSASGQPVGFIQLSPEEAAQLKPHPVLINMTTGVFCFPPSPDNILKLARHGYGYANRVPASYGAKLPQRPMVSAPNRDKDNSRSGYLPDDADQALREGLQQFFPAFADRPWSNRRLCWYTDTPDGDFVVDNHSTVQNLFFATGGAGHGFKFLPVLGKYLADCFEDKAPSD…
g7.t1	MLNILGRVTGKSQPEESKESISAERGLPASWYRSPALYELERRAIFSSRWILVTHRLRFTKPGDYVSFKEAGFSFFLVKDRDNKINGFHNICRHRAYPVVSQESGCTAILSCKYHGWSYGLKGNLAKAPKFDTVAGFDKSQQGLLPVHTYIDMLGFVWVNLDASERPAVSWDSEFAGIDTQKRLQIFKIDDNYQFDHQWAMDGDFNWKTLADNYNECYHCPTGHPGVAAISDLSKYFVETNGGHIQHYNSNKDPNEDTYQIASTFYFPNASTTVSPHYFYIMRCVPVSASKTRMEYEVYRSKTATDEEFNKIHLLYKQVLEEDKELCNAAQANLNGGIFINGQLHPEKEKGPLYFQQVHRKLVMAHREIEKTENDGAQLWPASPKPKGIMKTAKLSEEE…
g8.t1	MEATWCSLVTKLEDMLEILKSCEHPGQITRSRLEHSIATIIDTSLQLRAQYPKLSQPIEPHESTSAASPQLDPPNDRSVQDRLLTAASSGDSQLPGTQSRKPTPCKPVERQVIASAKRKQDKDSDIRVANSVLHLSKRACRSDKTKDLGDSHIPELRKLQDKYSKYDKLCRMSVFEKLDDSLSSRMLCRIAAMQGGPAIRQFCTLVHHSRSRETNTGLLQVQGEGIERALCLARSLQVIVGRADFDNYLTRIAQLQMAMAIDGTDGSKTGRIRAAKETITDSMDRLGWPHEARPKFHWHLKRGRQWNRLCGSRRALIVFIPFRAQEPYNVNASDYLAMKGDELDRFHQLVDTPFEAAICRAAEWFQDSLIGSSDDVEFCWEKQHPNLRNGSEFIRETEL…
g9.t1	MDGEVDLPALTPLPSYLYQLLNTNTLAARHFRKELRAYNAAFAFTSVDCTPTSRGAQGPGVQVFQIHGALYHRSGPVEVLKGSLPQYAQLYFYDPQYAANARHQRNSHLQLQILQDLTAMLYEINNPYISIYRTAQDQLNSSAADARVILTSRLTLALETGQDRRRENVPTSDELGLVIPDAAGAETSRPIVLAARNSSALFTISAAHPSYMPLHYVLMFPHGDSGWRPGLTLRNQDGSRLQTSLTQQTYYRYYLHPRPGQTTNPFRFYRLFQQYVVDIWAICDQARLAWIRANQAQLRADLYSGVADAVMGNNDAQAGPVGRRVVLPSSYLGSSRFVSQCYQDSMAIVRRYGRPTLFITFTASPYWPEVARELRPGETGLNRPDLICRAFHLKVQKLV…
g10.t1	MYFCSPLQGERFYLRLLLTTVRGPQSYADLRTFSGTEYPTFQAAAAARGLLLHDGDWVACFQDAVTFATGQALRYFFVAALLNGPVTDPAAIWAAFQADLCDDLPEAAAALLVSADPDAYLDYGLYLIEGLLAESGKRLTDFSLPACQFNWGVRLQNQLLAAELAYDTDGQDTAFWDTVTGLNMDQRAVFNAVTAAIEADHSTAHFFVQGLAGTGKTFLWRCICAYYRSTGQVVLCVASSGIAAVLLPGGRTAHSRFRIPLDIHDDSICPVAPGSELGRLLQAATLVIWDEVPMQHRYCFEAVHRMLQDVRSSPALFGGLPVIASGDFAQILPVVRRGQRPAIVNACLQQSTLIWPHMTVLHLRQNMRVLSGADNTCFAAWCRGLATREMDGLISIPDW…
g11.t1	MDSSAPADDVAAPANTAAADAAAALAAPANTANTAPANTANTAAANAAAAAAAATAAAATAAAALAAAPALPPLPLPLARLPPPPCSPCRPPRRPAQGWLLSHSAVEPQICARAAGPYTTCVVVTGQLLDLCANCHYGSKGARCSFRSTPAPVVPVPAIATPSRSRRQVAAAAAAAAAAPAPAAAPATPSKKRRRTTATPAASPAAAAAAATTATASKKEKKKEKRKRKKKKVRKCVRDVKKSVAALELAIDSSSLEDSDEDDED
g12.t1	MAMVRTRPDLPRRDVLSLVPVYKLQLHLNDHIEFQVFEKSPDLGGTWYENRYPGCACDVPSHVYQYSFAPNPDWSRFYASSSEIHQYLKHVCKTFGLDKYITYNSRVTEARWDEEAGIWHVGVEGDAAGAYEAEILVNAGGILNNYKLPDIPGIHDFSGKILHSAAWDNKAALKDKRIAIIGAGASAVQILPAIQSTCKSVDIYIRTPSWIAPPVGLPPGRGANPLYTAEEKRRFREDANHSLITRKEMEANFNGMFAAFFKGDPAQKVLKNRFDEYMRELIRDPELQQKLIPEFEVGCRRINPSAPYLSALQEQNVQPIFDPILCIKPTGVVTVGTSDGASETSNTLHEADVLIAATGFDTSFRPRIPVVGRNGVDLRQLWESDPVSYMGTGVAGFPN…
g13.t1	MTDYPEEPLKRPTSNIVGTVETAAEGNIDLLVGEDDNPALAAKIHLINDAIDEIGWTGFHWKLFFLNGFGYAVDSMVLILQGIIANQAYLEIGDGGYQTGLTFALYAGLLVGALFWGFGADIIGRRIAFNITLFIASMACIVAGASPNWGALGFFISLIGFGAGGNLILDSTVFLEFLPSDKQWAITALAGWWGLGQALPGFIAWGIFDWSCTAASHCTWENNKGWGLIMFISGAFFFVLSLLRLVIIRLQETPKFLVNAGRDEELVENLQGLAAKYGRSCSLTIEQLKACGESRSSIRKRTPRGIMAELTHHVAGLFATRKLALSTSLVWLSWTMIGLAYPLFYVFLPTIIAHRIPHETTSVYLTWRDFVLTNVSGVAGPAIAGILVNFRYLGRKYTM…
g14.t1	MNFNLDFKVLAYPASNLSVDEPVSPSLCSLVFRCDDAKVATLLLVARTPTAHGTDSQFVLQYDADTLMPYTAKLCSGNGHVSQSQLDKILPVKGKGKKRPDIKTLDLSIKGPCPLWSSANDPAFSPKPGFEPAFQTLVDLAKATRVHVVLDYSHVRKQYQGMFKAFSRATRGLVGYPVEGLLVEQGLRKTSWKVFAPTEDAGAPPAYEGSRSQSSSSPIQPPRYWTPNSPTGSHASERTIPFSPEAAAAALRRAELEYQTDVINAAFEKRLSAHLDEVRALQVKAIDSAVATHLPAYLATDRLAEAVDAAVSRQLDTALQALLPNAVEDLLVPKDPPSSPATSFTSHDSRGNRHPKLPPLTRVGRTMLPHLRTHLNEQFHLYQKQQLQRFKNLADRTFD…
g15.t1	MQRLLSPRFTRHLSSASAGITAAQSFGPQGDTTATIPTLIPSFATALLPASSLSTVPTLPPASPSLAIPLPSLILAQHSVALYPTTTPAPAALMSDAIPFDPQSALPSDGATPWWVVTEFLQPHGLPTEPSYVLLPPPLIPEPTATRDEESLSTVTNLLGPTLEPLPSSVNLGSPVIDEPAVPFPDVFAFDPDDWLWPFAAPYSPQAQPPILSPSFKPDAQGNLPTKKDITNRYATSDSTDSGVIETGKLIADVWTYEFYDTGLVHIDDTFLNPSTNIWGYLPDGTRIGLDSAGVYIGWEKRVPYGPEMLDVMKAFWLPEPQWFI
g16.t1	MLLILATLFCVSGPVTATTKPQACWRNSTCNGPSHPAFTGPWEAFNLAPKSRSVEPQTLLSLPNGAPLGNYNHNGTIIKASSDGVVFDFGLEVGGILSFEYAMNGNSTNASIGLAFTEAKDYVGRKSDNSNGGQGPDNALLYPLNTTREGSYIMPDVSLRGGFRYLTVFLLASPNESLTVRRVKLEISFQPTWPDLRAYQGYFHSSEPLLDKIWYSGAYTLQTNSVPGNTGRAKVQTDRVGWNNAAYIGPGDTVLLDGAKRDRWVWIGDMGTAVPAAFVSTGEMESTKNALRAIFDNQSADGTLPKAGPPYLSKDSDTYHLWALIGFYNYYLYTGDEIFVQNYWSKYVLGVNRMLGKIDSRGLVNVTGTADWGRWTYSSERSSASMLLYRALVTGSSIA…
g17.t1	MNHIPPHIPSPSSLAPHQYEQEHNTLVRPQSQQSATIDFLPSGTFATDFLSGTLTPSGLIGYGGEIDLDFSAIDLNFLNTYNTRVPFEAQTPVDLSLNPHNRTTAWNRSISGEGSDAKLTHGNISNSIWRFVPVPGVHGYSEQGDLSIPTQDHIEGTPESLVEVRRRATTEKLDSAARDKILAIIFSQVRSHILPALSAFPSVMLLDKLIQFFLAGPTPSARTWIHTASFVPGKARPELLLAMAAAGAVLTPDRSLRKLGFAIQEVVRNHAPTVWEADNTLVRDLEMSQAYMLQLAIGLWSGSSRKIEISESFQQPLLSMLRRGNRFRRSSYSVQVFGPEDVGFVLEQKWRTWVQQESFKRLVYHLLSHDAQASMSLLTNPAISYSELDLPLPEPQELW…
g18.t1	MPKRILHDEIAIVSGSSSGISAHIGHELEWRGANVIINYTYPKLREEAEKLAASLPTGSIAVEADTSTIDGSKKLVQEAIKEFGRVEILIKTAAFAVNKPFEE
g19.t1	MRFQSVSVIAAAIATALACGGDHSCYGPLKDDVVLTRNVRRMQPDASNATTGPKAPLEWGQINFLHTTDTHGWLEGHIKEQSYGADWGDFVSFTRHMKQKANKLGVDLLLVDTGDLHDGAGLSDATSPNGVVSNPIFENVDYDLLTIGNHELYVTEIAYETFSNFSKVYGDKYITSNVQIKNPATGQFEYIGAQYRYFTTERGLRIMAFGVLFDFTGNSNVSKVIKAADLVKEQWFLDAVNYKDPIDLFVLAGHNPVRLNESSSSFDTVFGAIRGERPDVPIQGFGGHTHIRDFTVWDNKATALESGRYCETLGWLAMSGIESTAKKVKKNPKGVPNPTRSAVPPPSTGTVSASLQLPTSTSPSSLRYARRYLDWNRQTFAYHAKGSQNFNAFGTPKGA…
g20.t1	MAPFKVAVYLYPSADILDFSGPVEIYSMRPASGETIFEVKTFGHHDRISSESGSLVYVPNGIFEELEANIADYDILVIPGADFDVFDRLLPSKEGKELTALLRKFVSLPPRQEAGARILQSVCTGAIILAASNVLAGRTVTTHHLGFDMLKTTADKAAGGDARIEVVKKRWVDAGTTEAGVRIINAAGVTSGIDTSLWIYEQLAGKEQADYVAEIAEFERRGEAWGT
g21.t1	MTSSFDISKARERFPALQQDQVFLDNAGGSQALGDVIDSITQYLSKTNVQLGASYHTGTQSNTKYEEGYQAAAKYINAGRDEIVLGASTTQLFMNLSSAMLLNEGDEIILSKMEHETNVKPWLFMAERLKLKVTWWHSDKPELKLTAENLRPLLSTKVKFVACTHVSNVLGSIHDVSAIANAVHEVGALFCVDGVSFAPHRRVDVKAFGVDFYAFSWYKVYGPHIAVLYASNSAQQYVKPMAHFFNPTKTLEDKLGFAASNYEGVQAIPEIARYLEGSDQAIIEHEGKLQKILLDFLNSRNDVTVIGSASADSKERVPTISFVVEGISPKTIVVEAEKISNYGFRWGHFYSKRLCDEILKTGPEGVTRVSMVHYNTEEEIHGLVEVLKKVLPQSS
g22.t1	MRTQLFVGSLVSSVTSLSLKELCTPSYAASKPPASGAYQGITVNAAHDGRDDLVHVSYYAPDSSTFKNRLLATGGGGLAINSGSTSVTGGVSIGAVGGLTGGGFGSFTTQGDVHFFLANGTVNWENAYMFGYQAIHETNVLEKQLTKNLKAFYYNTKLYAYYQGCSEGGREGWSQIQGFEELDGASVSAPAFRYAHQQTQHLYSNVVEKTLRYFPSPCKLDAIANAIIKFCDPLDRKTDGVVARSDLCKLHFNINSTIGLPYYCPAKSGGRNPFGPGGGASTPVQNGTVSGQAAAVAQTVIDGLHDTRGRQAYFSYQPAATFEDAQTKYNSTTQEWELNISGLGGEFVTRYLWLQNTSTLASLEGITYDTLKEEMYNLWQTYEDSFQTTWPDLSRFEAS…
g23.t1	MSPTLTHLAEFRLPDYPAASLTLNGKSLSIYDENSSLTNQEQEPSAVPTGIATILYRWSPAALAAFLDTDAWFSLTWTVALPENKACGESAKQLEIGRVGNQVTFGTLDASGDNFEIMCTFNIALASETAAGVERRRGEWVPNVRESMLGEADMKSGEEVEEVGARWVGDVLANKRWDAAKGVKHSFHVEYAPMDIFGDGIPMSPHWLYNALDLSKCTTCNTEGSAAKPLNRCGRCGTAAYCSSVCQKEDWRVHKWVCTMSMEDRGQAIKISEKSGLYKWDTARTMAAKGEEVASDNPFFETVQSRRTREE
g24.t1	MKSVIAVAALAAVASAAPTKRATGPTDAAILNYALTLEHLEDTFYREGLANFTEADFKAAGFASDVYGRIKTISGDETTHVSFLTGALTAAGAKPVKECTYDFGVTSVQSFLATASILEGVGVSAYLGAAADIMSKTYLTAAGSILTVEARHSAYIRNVNKQSPFPQPFDAPLSYDEVYTLAAGFIKSCPSDNPALPVKAFPSLSASSKDMPIKTGSTVLLGTSGYKIEGTVYAAFIAVTGPTFVEAKAVNGGYEVVIPEGFAGQSYVVLTSCNTAATDDTILAGPAVVEISA
g25.t1	MKSFTLVAAAVLAAGVSAQYSAGSVSTPVPTSIPGGCNPAHPGSCPTPYSASQVSVSKPASSKPASSKASSAPPASGSITTTITAKAGCPTGPAPDVIVTRSNAPVPSCEAGKNATKPSIMSMPGYGPPAPSAGSGSGSGSGSNSGSGSGSGSGSGSGSGSGSGSGSGSGSGSGYGSSYGSSGNGTKSTSTSSSNLPEFTGAAGRNMASGALVVLAGVAAYLL
g26.t1	MTSPSNLPAMTSPSNLPAMTSPSNLPAMTSPSNLPPLPLPSGVTENYLHCPSNGLNFHILEAGYTPARDKPLIILTHGFPELAFSWRKIMAPLAEAGYYVVAFDQRGYGRTTGWDTSPFDKTDMSHFTLTTIVRDVVALVHALGYRQVQCITGHDFGAVTASLSALIRPDLFRSCIMMSHPFKAPAALPFNLRGGEEPPAAPVDIQAELAKLPEPRKHYKWYNSTSEAAPQWNNPPQGMHAYLRGYLHVKSADGSNNSPAPLNEWSAEELAKMPHYYIMPLNKSMPDTIADMMKTEDASATKRWISDADLDVYVQEWSRTGFQGGLNFYRTTTDPAKQKDVELFAGKKIECPSTFISGKHDWGNYQQPGAVEAYPNSCSDFRGTRFIDGAGHWPQQEQP…
g27.t1	MFSKRRRAASNPPQRAAPPPSASAALAATTAFVRNQASDANLSNAAAAAALRSHTSSPIPVGDVVTKRMVRRGSTSSQGSQRPQGLRRQSSAGSMTERSFRNASPGRGSPVAVPPVPAVPRILHGRAASLEPVHRRGASPTQRGGGAGGGGGGGGGGGRGDSGAGPSANAGSTQRVGSPLAQVSEEGQDQRQSINFSRPMSPALSVTAGGPSATHAWFTGPVVDHEAVQRMASTSQPKKAAATTRPASTHQLKPAGTAAQSRSFLPATSPSPRPVDPKSPDAVYDPSTRTFIHKQDAMHIHREQHQQPDDPAHRYVAQHLHSAAPMHAARARTPSPLRYTVQPEQSPPPSVAQPLLPEPHTAADTPRYEERPISPPPSHPRPAPAPALARQRPEDYTNT…
g28.t1	MSQSTTLDAHLQSLVAGHSNRTALIQEVIPALLRTLPDIAQALRTTSVSQAGSANSFGDDQLNVDVLAENLIRKAIAKVPSIATASSEEDPIEKPVHKTQPTSEEQYTIAFDPLDGSSIIGPNWTVGTIIGIWDGTSALSTTEAPRKKQIASILGVLGPRTTAVVALRLPGTPGTCFEASLADGAISMTRPSVQLATAPKTKYFAPANLRAASENTNYLALITHFVSSKYTLRYSGGLVPDIFHALVKGHGIYTSPVTDQSPAKLRRLYELAPIALLVECAGGVALDARDGSPVLDTPIRDTEERGGLVCGNAGDVEFVRTRLLDA
g29.t1	MLDADFTSQGLGQLSAEANAQSYAQDYGPPFWNINYFLEDYVNSLPSTQIMPADMGFSLGTSVEEDPANPKVEEDEREKITMLFLKTTCHNLSIEEDSDQNPWKTVIWPMTQQYPALYHALAALTCFHTSKAQPHLRFDGERHLHTSARLLSQGITKSEIPLDTALAATLALGFAETWDSKSATTGMTHIRSAGMLLQQMLSNQATMAYTPEEEARLEFLFNTWTYMDVIARITCLDLCPPVPESFVAATVGRLNFSTSKLDPLMGYATSFFPIMRRVADLICKVRMRDAPRNSPVIISQALELKRNIEDWLPPIDLETIEDHSQLMTDAIQTAEAYRWSTLSLLYQAVPELPNLTSYGELAQKILVYLATIPLSSPTLIVHILPLMIAGNDAVDAEDR…
g30.t1	MAVISSLASLAIAEEGRPRGNFRLCTEVTPQCPAIATTYGYYPVLGVNAFFLALFGLCCLASLIIGIWTKTWTYTVALGIGSLLETGGYAGRIIMNGNPWSDSGFRLQIVCLVLGPSLVAAAIYLTLKHFVLYCGPQYSPLKPRLYPWVFIGCDIGSIVLQACGGGVAASGANNIKLLNAGNNLIIAGIAFQVATMAACGLLVLLFVWRYRKDAPMKGQLNEKSNYRLSKEQGNISLAKVKIFGAVVTLAYVTVLIRCIYRLPEMAGGWGNPLMRNEKEFLLLDGMMIGIACVALTVFHPGFFFPPFAAFRHGKRRVSSESD
g31.t1	MKTSKYAPKTPLEQLTQSRVDKLKQDKDKTTRLLGRLRWKAELLMVSYFKAMELLQAGDQRNGHYESQKALARQAESMFKIDFFEFYAFLERYITFCLTTLGVSVSAAAPRNNINALRYITNPDLHRTRPLASHAFHANLLEALDDETCPLHGSLGVQDVRIQLGLAKDYRNAWKDADEKEVTSNWDSQDGASPRNVKLPELALDAMLRTVIVGCGHAHDVVQAFEGADVIGSGLSSHDFEPPTYIHDTMDMGDVPLEYMDDAMELD
g32.t1	MPSFAFWKSSKPDEAKAPLLSDAAVAAELSAIVPGASRGVDLNPGNQDSGVFLFDDDAQEISEDHALDAEPIPLPMTEVLLEEHEQTTTETLVTDESLLDSDEPSPHPETPSLVPEQPLQTGASNVSEHSAAEETAQKPEESQIDSLQLEQHETAVESSKDEESHSPSSSPPVSLVPKELGPNLSVEKRLSPTALVKVETRMRDRDSGVYMSDSESSPARSRPSSIASNDNVLARSRVSSLSKPTAASPQRTNSIARLQRPAELNLGFNSAPDAAKPRSELDLRYDLIRNSKTQSKAALRSPTQLLQDRLNMSPRKKDVEEKVRVFTPPRATANGCMLPGPGAQTEAFTSTSVRARTEAGGRPAWWCKFDKLVVFDGLEQQGSGELGLKTRTSKGLSIA…
g33.t1	MFLFFAPAKKNWRGWRVSMSSTAFAHTSNQSRSIAERRRCSPSAPPRARAPSTSTEHEFELELEFGVESPPPWPSRLQNGGSAHPHQRQHQVQLQVQLQVQLPFQHPHPHPHPHPHPHTPPSSSAQTRPRHGPPSSHGAMASANGNGQPMPVRINGQTHGQPPTQAPAHAHAHAHAHGHGQAANLREMGFAGARSPPSNKSTSHVPCKFYRQGACQAGKACPFLHSDEPVTERAPCKYFTKGNCKFGHKCALAHILPNGHVVNGNMGRGHFGRVNIHSQDPPLNSSLLTMQAHMAPMQPGYPYPAQDDPYAMPKAHYDMIPTIDTTFSSHPGSNYGSPPNDNQRLALSPVQKGLGVMDVPLPASFDSQGISHMARYGPIASSVPAKFLAASPPSSYHAD…
g34.t1	MALSNGTSALQVRALMTRVVSYGDTSVVFVFPTPSISTSVTYWTGSYPTVTGPEALDLQTAPLTTRSIRQTPLSELPSLELFASTWSSFRTMVTTVLDEAATPTQVPAIEPVYCGESGNFTLSFDDTTVGPNESTLLVVNGMKNPYHHLFYANGFTYVPDKWEPYPAISQPNIAMFLPLTGRLLPNTAFTGSLLPGEIGAGPRASVPAYWFNAHSGFFGCALSGLTACTLRISGYRYDGVLKQEVLVAEQNATLPACWGYMNCRLTEVAFTEQFRALSGIQFNAFTSGLGIPQVHMMDDLQLEWYDKTCAAGILRIGHL
g35.t1	MPEVEELRELLDGLLGLVLTPLDEGPTANVRLLLRTEEDESLETLEKFGTIELDKLDEATTLVLLKVVFAKTAEDSKVVFKVKVDVLEGGIVATTPVELDNAEDVPLLLELIEELKIGKRDAVGAIADTIPVEELHVKLDPGVIGAPRVVLKSAAGTVELAVGGVTPAELDAVLVSELIRRLDDISLGPVAVKLVEDGLPGEEK
g36.t1	MRGNKNKSAAHRRRQSQTPVKDRLTEVVAARRKAGSKSVDTAPAMPPLATIFDAIGNWFIGKNSDDNIADEASPFGSTVDSGASPSHTPLSKKAKKRIQKRHNQSIEIETFTPSKESTSVGLDHAASLRQHPSASHITSSQLINGSMDYSPRTALYERNDAKRPSDTALKRDSVISNNWEDVNLGRSPRTTKKPGPSKQNWRRLIKRPSWCPCRLYLWLGEFLSALARGFQGPRRADFFLSLGLFLVCSYVTYVALDFVLFGLIKGVKAQNVVDAANCSVVYVTIPGPIITISLIAATPSDPARGTYYYSVINGTTGWLNSVTPPSRSHIISAPILNPTPGPSSLVLSGSSVLTPSSSSSPGLSASLEPSVGITVTTTITAGNTVILSTFTLFASLVPS…
g37.t1	MAPSKTKTKTPPHKSNDHKRYLADHVNEAAGSTLDLNGSDADGKALQKMEQSNDSDLEGFGSEHGEKNDQEESGEEEDSDAESVKIDMEEKKAEKVVLPKDAEEEELERLIFGDSAGFKQGLDNFSLSRTAGMYGDASDEEQADEADLENVADDNLFFFDTGPEAAPAGSVAAAKAEESEDEEDKPAWDDSDDERLVVSLASIPQLRKLRETAEDDMVNGKEYARRLRKQYVRLYPAPEWAAHATGKAKKRRRTTDEDEESGEESGSDMDVDDDDDDLSTQPLARLLKDADILSRNVARGPAKRRKLQAGTVDIQRLKDVSKAGPSAITSLSFHPTYPLLLSSGPSSTLSLHHVNPNPPNPNPLLTSLHIKRTPLTTTAFHPSASDSRIFLSARRRYFH…
g38.t1	MPNSDLHVSLLKPEEAEQYMHIRHEVFRPSVNKVLYSRGEPSQETLKRVTEEIRDGVVNKGILYLKCVDTKTGEIIAGARWRDVKPKDPNASERTWEEVDEEFKRTEPYDESDPDLFYALHDLFSSNKRSILETRPHYALDTLVTLPNHERRGAGSMLVRWGTERADEEGVEAYLEASPMGAPMYARHGFEPVKKVELDLRKYGGKEVMEFILMKRPAKVGTP
g39.t1	MNINQPVQGRAFAIPFTRAADPNAELTDQELRLPFLKKLPDSMRNHFVAMCGEYVGTVLFLWFALSGTQVANSIPSTGGQTVAEAGANPQQLQYIALCFGFSLAVNAWVFFRISGGLFNPAVTLGMCLIGALPWVRGLLLFFVQILGGITAAALVTCMFPHQGKINVRTSLGGGTSVTQGLFIEMFLTAQLVFTIFMLAAEKHKGTFIAPVGIGLALLIAELTGVYYTGGSLNPARSFGPAVVNHTFNQYHWIYWLGPILGAILAAGFYKFIKILEYETANPGQDSDHAANVERRKNLLLAAGINEYDASKVAEELTEKTAVAQAGGPDGTLVANGQGRRSQEVDRQGIYGTQFRHNSTHSKHGSDGSDLTYPPPQRPLATTTGSQIGRFSYLGERGVA…
g40.t1	MANNHHGPPFPFPYPQMQQMQQPPSNAHHDGQQHPPHPPHPQHPQHPPPPPPGWNLPGLHQQYPPPQPYMPQPGHAENQNNLPQFPSAALWPPQIPPEWLQLMQSGMQSGMAPPPMPGLNFPPPSLSQTPQAPTTPMAFPPHFPPRPAAAPLERVQEVTGTDREDREVSDAEGALRTTAAIAVRQRYPEPPRSAPQPMATPSRTGDVYNPEKPSAGQTTSHTSTPKSVQQASAVVNEMDLVQQQREEAKQFIRLLNSNNIGYHALAKENIDIELLRAMYRSMNLPSEPEPIPPPKANGTAAPKSSSQVLESPATASAPSTSQKTIPAVSTNVAAASVASAAASPVDRKDYLARLQAAKLARQSGPAKVSPPHTSPPVTAASSATAISTPQATTTPTRKQ…
g41.t1	MSAPAHNGPAHVRNSPFARGSGSAAAPSPGPTPRPLSIGHQPHPHTEAKMAHARHQSLTHLSSPPLGRSDSRLRSDSNRSSVPIGTFAPQFISEDSPDMARPGGIVEGENDFSGKRYVWLRDPKTAFVRGWVVEHLAGGRLLVQCDDGTQQDVDEDAVDKVNPAKFDKAGDMAELTHLNEPSVIHNLHMRYQADLIYTYSGLFLVTVNPYCPLPIYTREYINMYRGRGREETKPHIFAMADEAFRNLVDEGTNQSILVTGESGAGKTENTKKVIQYLAAVANSDTPRAKSGAKNLTNLSEQILRANPILEAFGNAQTVRNNNSSRFGKFIRIEFSRAGQIAGAYIDWYLLEKSRVVKLNPNERNYHIFYQLLRGADPTMKQDFLLDSKDTEDFDYTKHG…
g42.t1	MVKAVAVLRGDSNIKGTVTFEQADENSQTTVSWDITGHDANAERGMHVHAFGDNTNGCTSAGPHFNPHNKTHGAPSDEERHVGDLGNFKTDGQGNAKGSVQDKLIKLIGAESVIGRTIVVHAGTDDLGKGGHEESKKTGNAGARPACGVIGISN
g43.t1	MTSSLDQLKATGTTVVCDSGDFATIDKYKPQDATTNPSLILAASKKPEYEKLIDAAVAWGKKHGDNIEDQVDATLDNLLVQFGKEILNVVPGKVSTEVDARFSFDTKASVNKALRIIDLYKEQGIGKERVLIKIASTWEGIKAAEILQRDHGINTNLTLMFSLVQAIAAAEANAFLISPFVGRILDWYKASTKKEYTKEEDPGVQSVGSIFNYYKKYGYKTIVMGASFRSVGEVTELAGCDYLTIAPNLLEQLYNSTEPVPKKLDASNASSLDIEKKSYINDEAAFRFYFNEDQMAVEKLREGISKFAADAVTLKDILRKKIEA
g44.t1	MATTQEAFRVQGKTAIVTGAGSGINYCFAKLLLDKGCSVLMADLALRPEAQQLLSRFETGAPRAVFQKTDVTEWKELERMFAVATAAFGDVDIVCPGAGVYDPPWSNFWHPPDTTVSRDAAGGGRYATLDINVTHPIRTTQLAIAAFLDSQARTGGKKKKKRKRVLIVSSIAGQNANLHTPIYVAAKHAMNGFVRSLAALDTRFGIRVNGVAPGVIKTPLWTEHPEKLQFISSDADEWATPEEVAEAMLRCLVDEALPGGSILEVGKEQTRKVEALNDPGPSGAGHTVSHLEGKYEEVYGLLERRGWGKSKL
g45.t1	MSWLAYLSAAPIALIMLLRALSLVLPARLARQATFVAFSITAFLFLILCASYGVFASVFLRAIGYGGLSQWTVGRAFKWTMWLSTGITFRVDEAGGREEGGRRGGKEALDTRPAVFVGNHQTELDVLMLGCMFPPYCSVTAKSSLKYTPFLGQFMALSKTVFIDRANRATARAAFDSAANTMRNDRQSVFIFPEGTRSYASEPTLLPFKKGAFHLAVQAQVPIVPVVAANYSHVLDMKSKIVRPGVVDVTVLPAIPTTGMTAADVDGLVERTRNAMMDELVRLSHVSGSKQGNGVPLPRASGVEQFRKELRQRS
g46.t1	MQLPRRSVRSIQELPSIYTVFPPHYKPVRTHSASTFSDSARSPDIEDGLEVVPLELCTDYSALSVSACLDEKEVFIMEQREGLEKPLPSVPKSAWGRTWGRMSVKYRVLAVLGLQALLLLTVGIALLAAGPKRSEDNHSEIRETGSNETNTATTSTLERGTFMVPIQFPQQQSSKCLARANESRAWQCAFDTMLQLSILPSQGEDADEPIMITLGLPSTSNRSVHCGQQAPEIGPTALVALDGSGDEAQYRFSAIYSRTVILREDQLGQEKTNSSPMQGQPRHTIFQPGLSLWRCRFNDTRLEGSIYAEKGGGSVSNVTDAAPEASRRLPYKLQLLEQRVPATGSVPYCERVVVGVDGGLEERNEKVSLEVSDAQSEAGSDEDQADTSCQCQWLIE
g47.t1	MRFTSYATASALAALASAQTFTDCNPMEKACPNNPAMPQTWETDFTAGKDAIKGWKQTAGSLTYSAEGAEFSVAKKGDAPTIGSEAYLHFGYIEVKMKAAPGQGIISSIVLQSDDLDEVDWEWIGGVDSKTQMNYFGKGNTTTYDRMIEADVSSTQNEFHTYALNWTSESLTWIIDNKPMRTLNYADANGGKNFPQTPCNVRLGNWPGGDSENEGTRQWAGGEVDYSKAPFKMTVANIKVINYSPGTEYHWKDKSGSFESIEVVGAGNKDGAPQNNAVLESSASATGSGIPLESGFAAPSATGSVGSGNSGSNNSSTTCTEGQQQATPAPASGGNSDFNYPVPTGSAGTGDETPCSCGVATVTVTGTPPSGDAPPATETPSAPASSPVEGGTATPPTST…
g48.t1	MASAAQKKLVVCGGNGFLGSRICRAAAHRGWSVVSVSRSGTPHWSSVTSSADAPPWSTKVTWAKGDILDPSSYNAHLESADAVIHTMGILLEADYKGVVSGRESPLSGLKRAFSATKAGTQNPLDRKDGETLRPMESDGQLTYEVMNRDTAVSLAQEASKQNVPTFLYISAAAGTPILPKRYITTKREAESIISTTFPTMRSIFIRAPFMYDSSRTFTLPIAAGGAVASMINSAVGGRLTWLMGAGGIKPLKADLVGEAVVEALEDDQVRGPVEVPEIERLGTRAWRKNML
g49.t1	MPAPAPNKRVKNKRISRNIIIGSEAWALPPLGHPDRPKGIPDDHTKRWTVYVRQPDGDPSLSTWLNKVQFKIFNTYENPLRTCDNPPFEVTETGWGGFSIDIRLHFVPISGEKAQYRQHFLQLEKYGSEEQQAQQERTGCVRSEFLEVVHFNEPTEALFDALTAEDQWAHLVPSKSSSGSKKASLGANGRLKRGLPNGERSAQLPEKGGDDVPFSQEHEQGLIDSLMDKIAQVDRELEKETARREKTENTLKALREELGHEAAQQAAQQASGDRSRRRKRNTTTQAKPVFSQVHNSFIEESYLFTEKTPQQSVARLLLRPTKTKDTSTP
g50.t1	MANTQEDAQPQHQSEEIQVPQIPQTDEPADENDDDIDDLFDSDDEDAPELIESNNPSDFTKTYNRQRKLNDPSVPADYKPKNNPQKPSANTNLSLDDQVASLSKHASKIRLDSRFSGATGGGARDKDKADRATTEQVLDRRTQMILLQLINRDTISELHGVISTGKEANVYHAISESPEDGEQTHRAVKVYKTSILVFKDRAKYVEGEFRFRQGYSKSNNRAMVKLWADKERRNLARIHDAGIPSPEPIALRTHVLVMGFVGDRKGKPAPRLKDVRFDGLTSEEEDAKWTDLYIEMLAYMRILYHTCRLVHADLSEYNVLFHEGRQWMIDVSQAVEHDHPRSLEFLRMDVKNVSDFYRSRNVEVLSERRAFAFITGEKGEKEVKDMEAISNTVREVMKR…
g51.t1	MKFSILTIVPLAALAAAFPSPQNADRPVATGSCCVANTSLKQDVCNVNGQSGRCVPSAANNCLFPYLDMAGVRRLTNLTGGGQLTCIEDNRLQCDANTLKRGRPLCRLASEFGKIN
g52.t1	MHLNLRTIGAGLALLMAVVSGSSPFGSLRSRAETFENPVIWQDYPDLDVFRVGDVFYYSSSTFAFSPGAPVLKSYDLVNWAPVSHSVPRLNFGPRYDLNNATDRAYVQGIWASTLQYRESTDTFYWMGCIADGPTYVWTASGTNAAANNGEVEHWNWTSQGTLPRCYYDNGLLIDDDDTMYMAYGKTTINVAQLNADGTAEVKTEPVYTSPDEVYIEGSRMYKINGTYYIWVTKPADDEYVLKSDNVWGPYERRVLVDSIEGPLSSAGNAHQGGIVSTKDGQWYYVAFLDAYPGGRIPVVAPLTWTEDGWPQVVRVNNEWGKTYPIPVHTNKTVPATTGVDSFHGSSLSHEWEWNHNPDDSAWSLDKGLQLQTATVTDDLFTARNTLTRRIPGPKSAGT…
g53.t1	MENFEAFLENATSKASNVIPGAVLAVVDKNGNYIYKKVSGANGVHKDAQPLEFDQTYFIASCTKLVTTIAALQLVESGLVTLEEPLDRHLPELASQPIVTRTQHGQLEYHQATVPITLRHLITHSSGTTYEWLDPTLHAWRASRGEAPALVVDGDVAKGYAVPRTFESGTSWNYSGGLDWTSLLVERLTGTTFEAYVEENIAKPLCIQTFTWHLSHKLYVAEKRMRVSTRKVDGTLEDGPNPFWPEPVKEGGGAGMYSNVHDFTRVLADLLKDSPVLLKKSSVDEMFTPQFTPGSSALRDLHANGAVYQCTLDDSMEGVFANQGLGGLLVKKDVNRENYFRPAETLSWSGLPNLAWSVNRERGLATFFATQVAPWADRKTWDVIARFETATWRNLSA
g54.t1	MPSQSSYLRPGVLALGLAATSSFVAAAPCDIYASGNTPCIAAHSTTRALYSAYTGALYQVKRGSDNTTINIAPKSAGSVANAAAQDTFCSGTTCLITIVYDQSGRENHLTQAPPGGFNGPESKGYDNLAGAIGAPVTLNGQKAYGVFVSPGTGYRNNKVSGSATGDAAQGMYAVLDGTHYNGACCFDYGNAETNNLDTGDGHMEAIYYGDSTGWGSGAGSGPWIMADLENGLFSGQGAKKNTGNPSITSRFVTAVIKGGPGKWAIRGGNGATGALSTFYSGARPSGSGYNPMHKEGAIVLGIGGDNSNGAQGTFYEGVMTSGYPTDATENSVQANIVAAKYATTSLVSGPAYTVGDSVSFKATTAGYTNRYLAHTGATVNIQVVSSSSTTTLKQAASWI…
g55.t1	MRLQSSLLSLAAATTVSLASPLLTYQADQKVGYLFTNFPVNDEQVYMHLSVDNDALSYRQLSYDGTLETARILESTIGTTGVRDHFIINAQDSSKYWLHATDLKVNALGGDFINATRFGSRSIVVWESTDLATWSEPRLSAPLANVSAGNVWAPESYWDHTRNEYIVIFSSRYWDPADVERTGPSPPNKLMYVTTKDFETFSKEQVYFDPGYPVIDCSLIPVPEQGENVWYRWVKSEVDYRIWQQRSSDGILGTWSNVGDAPDGTRVTFADRYSNNEGQLCFRDNQDPGLFHLWIDQSSTETYIPAQARTLDDMAAWQLSDTTSFTKNTKHGWVFPLNQQQYETIQAKYKFI
g56.t1	MKYIAVALALATAVAGHGYVNNATIGNKPYTFYQPYQDPYTSPAPQRISREVQGNGPITDVTSADLQCGGYTEGGIVGSKPAALHAEVAAGSAVDLYWTLWPDSHVGPTVTYMAKCPDAGCNNWMPSATAVWFKVQQTGRTGTSNTWGATPLMKAGGVVTYTVPKCIPSGNYLVRHEIIALHSAYSYPGAQFYPGCHQLKVTGGGSKSPSGLVAFPGAYKGSDAGITYDSYKAQAYTVPGPALFTC
g57.t1	MVINYSKWDALELSDDSDIEVHPNVDKKSFIRAKQAQIHQERDHRRHQIKTLKYERIINDGLTERIDRLLTALKSHKSKLADGANEDQLVFQAMMESMLDMKENAPPPPPEGVHEHIKDKPTYPQMMASMVDIVKKEIDASKSTDSRYDQFIAGLHKEKERVEDLQKQLLAKLAELEKEDKRHITSDDIKDGFSHSSVMKADQKKPASTPSSSTSRTETVELLNAPKRPEATRTDTGDSGADADIEEGTAAHDDDDNDDDVEASPLAKKFAAIKAGDWYACLQFLMQHSEILKESETDGLLVEAFNSELDGKPKHARQCVHQGLLLQYCRQLGGRQGVELFFKRIQSKDHQASKMFNDDVDSTYHRIRTRAAEILKERAENPAGAEGVEQIQLHAVDPG…
g58.t1	MAFTEDSLKAKLSSLNETQDSISTVGQWILFHRRHAERIAAVWLQRMKESPPNKKLVLIYLANEIAQTSKMRKKEEFLRAYEPIITEAATVAYKGSPHDIQNKIRRVVEVWRQRQIFNQAVQQSIEKSMNDLDSSRSVGRKPALGGSLFSSSTIPAELAPVAPLATSVNKADLAAKPAVATANQEYEKVTNPNYTIPSAPVHAAGLSTLVKKLAVAEGAAAESIKARQALIAGLEQLLATNKSKLEQDQTQVDDLKTRKDAIESRKRQVEDAILQGLSAIETNRISAAPLPAVTTSPTGQDRPRVEELTPPPMESFTPVGSPQQGPAQVVEPVPDIGDDVMPEPVSNPVIPETAPAPQGHTTMPGFATSMGDTNVPHDLLKSLQHARPGHEGGVYGQHS…
g59.t1	MADRFPSLDEFDAGQSEARGDATNFDALGDDANDDFLSRERAILGDDADQFASENDKLATVEDGDDDLLGGDFGGQANVGAQEIGGFESSFPAIDTTNEHMAPGGTITGPTLPFLPGQPAPSFTPQRSDSPEPDVIREWRERRELQIQHRDEVSAERKSKTIQEAQQNIDDFYENYNNKKDKEIAKTRKEAEEFLANRDDTTAGGTSWERIAKLVDLSGKGTKGGASGSEKARFRELLLSLRKDDKAPGSTGY
g60.t1	MSEKKDDMSPVVLAPSVDEGQMAVEKQMHDIGADLYLEVRQYTREELDAERKIVLRKIDWVIMPMICMTYMIQFLDKLSLNYASAYTLIPDLGLEGQRYSWVAAIFNFGYLFWALPANYLIQRLPVSKYTGSMILLWSILLCCHVAAKNYAGMLVLRFLLGMFEASISPAIMNIVSMFYTRSEQPLRMCVFLAFNGMATMVGALLGYGLGHVHSPHITTWQLIFLVIGLVNFVWAWVFLWMMPDSPATAKFLTHKQRIVAIDRIAGNMIGVKTKQFHKSQALEAFMDFKVHCLVLIGLGCGVINGGVSNFASSLIRGFGFSGIYATLLQLPTGAIEFLVVPVCGLAAGYFKDSRCLILALICLPPLGGLLGIRLAPLSQRWSLVGCTWLQYIVGAPVIL…
g61.t1	MPETTKVVPLTCHGHSRPVPHIHFSSIVDEDQFYIISACKDGNPMLRDGVTGDWIGTFLGHKGAVWQARLSSDASLAATASADFSAKVWDTHTGEALHTLSHNHIVRAVAFPNQPNPQILATGGMEKKLRIFDLSQGDSAPSYEIGAGVHTGTIKSIVWTSDPNILITAAEDKKIRWWDLRTQSMIGEYAVEGVVGTCELDNTSPDGILSVAAGNSVYFFNSLQPGSLIKTIKTPYEIASVALHSGARRFITGGSNQNDTWVRLWDFDEEKELETNKGHHGPVWSASFSPDGKLYATGSEDGTVKLWKYTAGAYGLWR
g62.t1	MFNTVRLTTSLLRSLRPATLNSTKYFSTTTRTMDAYKKAGNRKDEPPQHEMVHFAGLLSSKREFGDFRTVLHTGLFSQIVAMEVPVGGDIGDEVHTVDQILMFTSGRGLATVNGKDQEVKAGDVVVVPAGTQHQFVTKGDTPLELITVYAPGEHLPTSVHKTKEIGDKEEEDGIDEAPEWSQKSKKENVDKGLVNESGKY
g63.t1	MRGTAAFVAKAWHGPGPLFSSLQPPRITTTSPISVLSRALNTKPTPAHIATPQARCASRCASSLFPSSAALRFAPVGATRRNVFQQPMRMLTASRTLAEAQVKTPTRQRKSYKKEMEEKGAVDLEENDGEPEESQGFVKSEKATAARQVNLSAKLSKEGSSKASGGMGEIWRLIKIARPEMGTLSWAFVFLLFSSAISMSIPFSIGRILDAATQAEKTDGLLFGMDMTTFYIALASVLCAGAAANFGRIVILRIVGERIVARLRSQLYRKTFVQNAEFFDANRVGDLISRLGSDTIIVGKSITQNLSDGLRSLVSGAAGFVMMGYVSLKLTGILALIGPPVAVVAFLSGRSLRTLSRKIQKNLGTLTKIAEERLGNVRTSQAFVGEVQEAARYNRQIKR…
g64.t1	MQHKLPHTATSHPNDPIPREPRELPQLALKPAPPSAQPEHPSPKSSGESMLWSQNSSDDSEAPMTPNTEPDHAVEELVDKLQDLPAAAVNFNGQTRPRRASTTLISDSPTDIRRILGDGETATKLISQCCGGGCCLLKTLQPDTSSSSSVPVVVPDNVAFSSLHLKLGPLALDSELTDTTPLPPLTMSFEPLPSKDIKHVSEVHKTPPKFVQPHPPYDVYSAPLYHARELTKPGAEKRTIHFDIDVTDYPDEGGVDFKVGGAVGICPPNAPHMVDDMFDLLGVPKFLRDKPVTLKTKTGRWPTIWGEDQPRELLTTRRELLTWCVDIQSNPPTKNLLRVMAEYADAPNEKKILEYLCSAQGQAAFCDLRTTSHLTVPQILSAFPSSKPPLPSLLSVLTQ…
g65.t1	MVHQRGLLDLPAELQVHIAAYLVAGVEYAESAPNLLHLALTCRRLAPVVREVLCLAPVLQSSKAHLLLYFLFKYPNLAKTIKSLTIETRETWEAKTYPVPIPRLEPDVLDHCKRHLRTLPIRKWTQDTIIASLDAAHFKDHGLLLSLILTLVPGLKKLYLGGSILLNFPIFHAMIFSEPEAPTKPDWTEGPDLSWVVALIGPKLTALELPIDFRRTVEDSIWWPSSISQIPEFFPNLRWLSLPHMAATKRARGSCCDMIPRSLEALVLTDARCTCFEPWSTRLVDEATATSLFPALARISLYHRYATAPTHDTVTTSLAHAGIEVREYVPDCCLRSGAEFHHPWKYTPAELDALSDARHAGYAVERDRAALQCGSDEE
g66.t1	MSATHHTPRSSPLLALPAELRNVIYGYVLAASKRIICAQFEIEEDHAHKYYEKGVQVRTSGIGASPHNSKATVESNQLQHVCRLLRRETSSFVPSSHIVFLRRSDKHSIKTASVTCSRWLDTLARSHIDALRTITIHEGIPWGVADHDFAACSGIFDLNAVEHLARFCSSSPHIQVKIYLARFDKQLKGFCRRSLIGYIVSMAVRKEDCCAAYGCTSGEARAVEDAVERMSSVWGGYAKDKPPLPENLRLFPVGQFQCDDWPTNKSRPELRSRIKRWYEEGI
g67.t1	MEDNGKAPMPVIGTNGAGVRRAVDEPIVKVQPPRREDLQPSYARVIEPDDADADNHGWYGGMVNALGGIVGTLGAIPCCFCCPNPYQPVSQGNVGLVTKFGRFARAVDPGLVYINPLSEKLLQVDVKIQIVEVPKQVCMTKDNVSLQLTSVIYYRITSPHKAAFSISNIRQALIERTQTTLRHVVGARVLQDVIERREEIAQSIREIIEETTAGWGVEVESMLIKDLIFNQDLQDSLSMAAQSKRTGEAKVIAARAEVEAAKLMRLAADVLSSAPAMQIRYLETMQSMAKSANSKVIFMPGPASVGDLATAMDAAGPSGQQTDPIQHTVNARVLEEM
g68.t1	MPPRDANWIDGLRGIASFMVVCGHLCTALVPWLHSPAPDAKTAPHLFQLPFFRLAVGGRSAVAIFFLVTGYVNSIGPISKSRAGNHDAAFTGIARSALARSGRLVLPTMAATFVTWFMANTNAYHMTKHVDSTWIRQGWHRQEPTLWAAFTSLVKVETETWTVGWNEYDGTQWTLHLFLEGSMLVYTTMFATVMVKPKARMLIYAVLYIYFWQMGEGLAIGALKGLNIVTGMFVAELHNHYKDSATSVLPAPIPAMMIVFGMFLAGYPQDSPQNAHWSHIMQKIMHSITCDKADVRRYWDHLGASTVLLGIFFSARARKVLTSPVFNFLGRVSFPVYLLHNTFIKSVLTWMIYLPSAMNPPRNEKGEQLDLQRGSTTHIFIAVVVFFYLLYRCAALWIK…
g69.t1	MGVSSSQPFPSSQDPVLSSNTAKNVTTPSLAERVPRCTPTMDDEAASQQLMSEARALHTTDHDGPAIPLLLDGASQDTITKTPGSSAKKAKKPRRKPPTASHNNLQDAFPGSSLPSYSLKELQAFVGPSPSKKKTSASTIPSTQIEVPATQTESQLNTAPSTTPLTTSQAATTSSSKKKKSGKGKENTQAQTNLHNDMQEEKTQPDVGSPSAGVKARNPRRKRQALNSQAELADTLIEQDTIPATPYEKTTEEPIAPPSNPIEGQTSQKRRRKNKPHSSVNSPDFDSNKIVETSIAEQEEAPGATAEGSRDHVGASNAEEQPLIPMALLDNLKAERLQSSPAGSALRKTQKLPENKSDAEAEADLPDAVETTTPIKTPGTAQSTKKRKRSRKDKQAPKT…
g70.t1	MASATGIPPNAAAARGQSEEEPLLGRRGDASQPDGQPLYQNLWTGTAAIAQGGIWILAAIVWGSILSQKLIFFSAHPLLNSAGFLLAIQAALVLQPTHTPEQKRSGTLAHVLFHVGGASALTAGLVIIELNKAGPGHEHFKSPHAILGLTFYILVYIQAIVGFTQYYTPSLYGGVDKAKSIYKYHRISGYVIATLGLATICAATWTTYNLNLAHMQHWAVIVASVLVLAGTVPRIRLSKFGLKKDEGQIRLQS
g71.t1	MRTYTHNPTPNPSQRPSNMCTSYEFNYLRCQREVKRNCKHTDHFRCESGMCKDDDHVHATLTRAEKCPVHAMGEEKKSKRAAHKDRERCEWPETNCRPM
g72.t1	MFGKAAILNALVSAVSAGTILWDGRFNDFTSSSDLNKWSWANQVGPYQYYIHGSGPVTSYVNLSPSYKNAGDTNSKQGAKITIDSTAKWNSDMWRTELIPQTKAAINSGTVYYHFSIKRGSTNVPSATNEHQICFFESHFTELKYGWISGEQGTSNTNLQWMVGGQSKWKVELKADEWHNVVYEINFSSQQVTFWHSTGNNTLVKTAGPFSASTSSNGADWHLGVLRLPRQGNDGTGAEDWYFSGVYVESGSLTTSIVSPK
g73.t1	MPIFGSHSCAVTQPKSRLISGPMHARHVGGVSITGGTGGNTLLDSYFAPSSLEPDELPSHTYAASGRIEVPRRSNTFTDAVRRPSLSLKRSISRLRTGSHTRSSEGHKRSQSDHHATTATTRSDPTSTQLVQRKPSPIPARPNLSLDWGIQDSASSSESPELFVAPEPPPKDIPRVNPKISMYSMSANSVVTDYETPPRKEVPPPLPGRPRRADSVTTIGFDKVPAEERPMGFKEIAAVQNYKDRMVLYEKTRDYWANAEHGLAEWTGRTGGPRTTQLRREEKRTGYDCFPIVETRR
g74.t1	MLRGAANQGARWAPSRNAMRRCLHSGLPLDLAAQAGSSAASRQQAGRWTSWEYRSLDRSLDRLQHAACRALGPGSNEARCSTLDGGRWQPERKRSTGADAQTLARLSRRGRVSDNNNSNSNSNSNSNSNRNATATATEQSSGAASRDSRRRPTQKNVLATARTTGSAPAKCWQRADGGLVQRAFLDDWDAAPVVWIRVQSSQCLVAVVAVVAVVAVVPGVAAR
g75.t1	MDSERPHLSITLPRNFMFHFRDGAAPQTPEPEPQVADLQPPPPPRQTLKVRRRRATLVQHQVELDLSMQEKPIPTIEATDFHFCSSNALPSPPSALDNAYLSPPTSFGRLVSPPKTPAHQVRTIDIFDGPQHWDDLETNRSETSSRPTSSSGFSDSSISSRGSMYSYLSRGGSCTSPEEEMCDPFSFDSLEMKYNQPSSPLAAHQQPRSAKKLKLRATFTEEMDFHLWRTYMNYLQDPTVTPFKAVPLTTPPNGVCHRVARMARKTWKAPSVSRTAGVRAAVHFGSHSGTPDTVKALKSGSTTPIARPNKSYLRYPTEKQCRKRLRDLARQRPTLSAYYQRLLHRSPSPLQSSPPSDKSEEPCEPQPQPHQKPLSSPFGQDTSSFTFSTRDMNVSLATS…
g76.t1	MPSIALTLRTARTFSRSSTKTYLNLARNFSSSLRRNEINKVFPSAQAAIEDMKSDSTLLCGGFGLSGVPDTLIEAVKSNSSITGLTAVSNNAGVVGGGLGLLLESKQVQKMIASYVGENKVLEQMYLNGELELELTPQGTLAERCRAGGAGIPAFYTPAAFGTVVQTGELALRHNSDGSVAQYSTPRDVKVFDGKSFVMEEAIKGDYAFIKAYKADRLGNVQFRFSAQNFNGAMARNAKVTIVEAEHIVEVGDIEPNAVHVPGIYVDRVIQSTAEKKIEKTVNAKDPADAVNALGSGDAANKRERIVRRAAKEFKNGMYANLGIGMPMLAPSFVDASVEVQLQSENGILGLGPYPKKGLEDPDLINAGKETVTLLPGASCFGSEESFGMIRAGKINLTI…
g77.t1	MADARGEYWYFEPGVDSSKITVPELRSILLKHGVGYPSSAKKPQLVALFNESVAPQAAQVQRTHARTKRTTRGIVDVPSSSNSTVDDAEDDTLVAPTPATRRTARRTTRGATEDAEDAAPASRAKTPSRAVPAKHSRALEPEVDERPAARRTRKSITPAYKEPTPDPEAWHRSGPESPFTQENPFQSGSSPAVPDATSRDKSRRRTLGSELKTRRKSDAHRRRTVEPSADQYDEGIVVPSRKTFDVAAPHAKEEEHESTDAGEEFTPEEQLELVRDRAKSGQVDILPPRRRKQPSKATGTLKAFSATLLLTTAAVFGGVWRQEKVEVGFCGIGREATSLAGVEVPEWASDILPQCEPCPPHAQCYRALELTCDRDFIRKDHPLSLGGLIPLPPTCEPDS…
g78.t1	MTDTKKKSVLVVGAGSVGAIAALNLQVGGLALVTVALRSNYNAVKEQGYTIESCDHGSLKGFKPSVVRNTIPDIVAENLPPYDYIVLCTKSVPDVGPTSVDLIAPALLRNNTHTALILLQNGLNIEKPFLESHPKTIVISGVSLIGSAEPTSGHIVQNEPDRLLIGAFPHPSICIDNASKKAQGFVAMYSAGGKTDCKYSPDVLHDRWRKLVYNACLNPICAITGVDSGRIRLADGGLEGLVRPAMGEIVAAAKAVANVELEEDVIDKVIDTDPMESWAKPSMQQDLEKGNFIELENLLGEPLREGKKAGVPMPTLEVLYQVARAIQWRTKERKGLVKLPGQ
g79.t1	MKLSTFLITVFAAAAVAEPCTSKAPVSTPTERVEMCTKICAFRPIQDCGRGGYTKQQGKCWSCCKK
g80.t1	MLDPTFHITTPRLHLSYLDPSNDAHMEYIARLKNSPEMRAMEAQTPARFNPQPLTLSTARAAQAAGAERLERTGTGRYIISLRDPDRAFTEQQEREYVGTVSMQLQRFPDAVCPAVPDVGFALLAAYQGRGFAREACTALMRYFSEVKGHVRFAGFTHPENLASQKLFTRLGFENRGVRLVDGVVVSDGVGVEVAVWVKGVPEDVDLASLNIGSRRAVGLVAGCRGEEADDLAVAGL
g81.t1	MRSPEGSRQTWAAIWKSLFAVGIFAQVTILLAFLGSYLGFYTHETLPSSIRAFTSTSNNDGLTLRHIIHHGAGQPGPRARRLDVTSDRMVQAEAVGEFGPFVVKKASITIEKPSKIYKYDGQRPMWSTMSPLWVAEDVAGPDVEDKDTVISLASMSEDAYKPGPEDPEWMDVDENYNSSVPFGWDDSGIRGHVFTDDTNSTIILSVKGTTVAMFEGNGTSGHDKENDNLFGSCCCGQGGSYWWKQSCDCMTGTYSCDDKCVREELRKPNRYYLATVELYEEVLRIYPDANIITTGHSLGGVLASLIGLQHGIPAVSFEAYPQAMAAKRLGLPVAGDVAPLRKNTGGFHFGHTADPVYMGTCNGFSSFCSIGGYAFETICHTGKRCAYDVVKDWGWRQST…
g82.t1	MSATRHAGYHSGGRRSTELDVFSPNDAPDRASTLQPESETPTSQYPRGIRLILITVGLVLSIFLSALDSTIIATAIPSITTEFGSISNIAWYGSAYIITNAALQSCWGKAYNYFPLKTTFLLSILVFEAGNVICALAPSSVVLIFGRVIAGCGGGGIMTGAFIIIALTAGPEYRAAYMGVLGVTFGCASVVGPLMGGALTDGPGWRFCFWISLPIGFAAASTMFICFTSPLRPREASLREKLVQLDLNGGVLVSTSLSCFVLAMHWLGIHSSNSPRVIGSFIGFASLLVCFVINEWMMGDKAMIQSHLLKNKMVLANACYIFFLAGAYFPLLYTLPIQFQSVNNVTASQSGVRLIPLVLGISAFTMIANGLLTFWRHYKPFLLVGAIFAIAGNARIYTS…
g83.t1	MPTTPVVAMVMAPIHLLTYSALLGTELYQSFIMTKVAFQALPRSAFTSLQKRVFPIYFKSQSLLLILVALTLPPYGPASVVHNKSDWVPLVIAGGTAALNLSVYGPRTLRFMVERVHQTTRDSKPLTDSKEISVEMKRLNRLFSKAHAMSIHLNLISIIATLCYGWRLSSKLSFEAA
g84.t1	MRLTLLSFLPATLALPAILQSRADEPVYWLLAGDSTTATNGGWGDAFLATTVAEGSSGVNYGHSGSTTKSFRAGGDWDKVINEIGSNKEDYRVYVTLQWGHNDQKPTSGVTITDYKTNLATFASEASSAGATPILVTPLTRRTFSGGKVVENLVNETAAVIEVAEANSLHWINLNEASTKYVNAIGSAAADKYNLASGDRTHVNEWGGVVFARIMSDLLVGKYPEEFESVTKKNETLTALIAAGTVA
g85.t1	MDKLDISHSNLAWTPDMFSFIYNSNPGRVVFKPGALSDISAELDRLGCKAALILSTPQQVNAAEQVTTLLGSSAVGIFSNATMHTPIAITLQALAQAEDKHADCVISVGGGSTTGLGKAISVRTGLPHISVPTTYAGSEMTPVLGETVDGVKTTRTDPKILPNTVIYDVNLTLSLPQNLSATSGINAIAHAVEALYAPDTNPVIRLLAKEGIHALAKSLPVIVADGANLSARSTALYGAWLCGQCLGSTTMSLHHKLCHVLGGLFNLPHAETHTIMLPHTVAYNAPAIPEASRDMIDVLPGADGDCVRGLNKLIDGLGMGKALRDYGMKEEDVEKAADYALRNPYANPRPIVLEKIRELIRRAWAGEEARSDL
g86.t1	MGSKNPATSVPQPSLKDLNTDNITANVNLVNSSNPSPRFRFLLERLVVHLHDFARETRLSQDEWLKAIQFLTATGQICSDVRQEFVLLSDILGLSLLVDSIDHPKPAGSTEGTVLGPFHTHDAEHMEHGDNMSHDQNGEPLLVVCTVKDKEGNPISDVKIDIWETDSSGMYDVQHAGRDRPDGRCIITSDQDGEFWFKGIVPVPYPIPHDGPVGKLLDVLKRHPMRPSHMHFMFEKPGWDKLITALYLRGDPYETSDAVFGVKESLVVDLGEVDETTAQHYSGTHKGMKMLTYHFVLVTEEEAAQLRLEKTREATHKLNPTAEVENGFIGF
g87.t1	MWNATYAESHQYYTLPELVPIVLKVLSLQHTSKVSLAKESTNSSAAFDGKSTIPIWLDGKEVVTADTFDVYSPLNQSKLYSCSSANEDDVSLEIQSAQKAFLTWSQTKPHIRRDIFLRAADEYKRRKDELRNYSLTETRASDAMFNVEHEAAYQACKDVAGLIQIASTGKMPIVSAEGGSSAVLNEPFGVVLGIAPWNTPNILGIRACLQPLAMGNTLILKGPEAAPATYWGIASLLHAAGLPAGCLNTLYHRTQDASKITNALISNPMIKKINFTGLTAVGSIIASLAGKHLKPLVLELGGKASAIICEDADLGLAAV
g88.t1	MPLNIIIVGAGLGGLAAAISVKQEKPDHRVQVIESAPALAEVGAGLQVTPNATRLLKRWGLMRSLEKLASSPQEFTIHRYSDGALIGKRDNFGEEMLAKYKSPFWDMHRADLQIGMYERARELGVEFRFGALVKSTELETPSVTLSNGDCVEGDIIIAADGCPSPPIPTGDLAYRVILRVEEIENDELRRYFETPRVVLWAGPDCHAICYPLKGGSLINIVLLVPDTLPEGVARAAGGLDEMLEIFQDWDPRLKSLLTMVPKVEKWKLMHLDELQHWSNAEATIAFLGDACHPMLPYLAQGAGSSLEDGAALGVLLSRADHRQDLPEILKLYEQLRKPRSSALQKRSMIQVFSFCPLRCAVRPLIERRGTSITCLTGLNNEQGTIY
g89.t1	MLHLLPSGLLGFGQGAAFLGICLTSYWIIPFLHGLTISSTRNVPGPFLARFTRWYEYFALLRGKSHVEYMQLHDKFGAVLRIGPNRYSFSDPSDVKIIYELGSKFTKTEYYHPLLAPNPDDQNIFAIRDPAFHKMRRRKIANLYSMSTIVSYEGAVDRMNKICMDKLKKYAIEDRELSLPDFLQWYAFDVIGDITVGSDIHAAYLQDLPDQFNESFRMMENEGDVTGMISGVHMANNYLAHAGIIPDVHPWVMRLQSLIGNKGAAMFLDFTFRQINKYRASNTKDTVTVGSDSFLGKLIYLQKEGKVSMSNILDACGSNIGAGSDTTAIGLSSIIYYLYNNADVLAKLREEIDKMAQQGLISDPITFQEAQSMPYLQAVIKESLRLHPAVGTILPRKVP…
g90.t1	MTTPSKSLTGKVAVVSGSSAGLGAAIVHELAQRGASVAINYPYPSEKTNAENVAKRLGRDTKAIIVEADMSTMEGPRILADKTAEAFGKIDILINCAGINRPMSLDHPDEASIEASWHEVVHTNGRGTFLLTRAALKHLSYGESRIINIGSGVSRAPGSDSSIYAGSKGMTESYTQCWAVELPRKYGCTVNGVAPGIVGTDAFYAAPQSLRDFLQPIIDATPVAPRIATPAEVAWTVAMLCEKEAAWLNGLYIPVAGGALIF
g91.t1	MASEILSLPFAFGAILLYTLYRIFCYIQFHSKYRFPNHVSGRLPLLGNMLQIPKHPSDQRPYFASLARKYGEMFTLKLGSQYWVFLNSHRVVGELLDKRGALYVSRPSLPMVGDVASGGKRVVFLPYGETWKWQRKVIHEILGPAEKSVYGPFQDVESRALLHGYLTQPDDWHLSNAQYSSSVIMSMVFGRRTTLNDETTSRIVAVNDELTKAFEPGSNLIDAFPILGQIPFAKSLQPWRWWGDNLYKTALRNFNSEFDHLVERQKSGKVPKCFASEFLRLGRDKNVSHEDMVFLFGSLIEAGSDTTRVSLNQLAAAAALFPDWVARAREDLDKICGSNAERLPNADDAPDLPYIKAAAKETVRWNPSFGEIAHSLTKDDEFEGYRFPAGTTFSWNHWG…
g92.t1	MHITPSTLFPRNYQMSAWNYDHTRFEAEVFELEVLGQVPADLHGAYYRVQPDHAFPPMFGEDEVPLNGDGNVCVFNFQNGHVDFKNRYVRTPKFEAERAARRALFGRYRNKYTDDPRVRDVLTRTTANTHVIYHANKIMALKEDAPPFEIDAATLETIGMVNYNGTFKCPTHTAHPKADSTTGELVGFGYEAKGDASPDICSFTVDKSGYLTEEVWFKAPWACMIHDFWVTENYVVFPINGLKASLEQMQQGGEHFFWDENLDHQLLGVLPRRGAKPEDVKWFKTAKGCYSHTINSYEEDGKLVLDANVWTDCVFPFFPNSKGKKFHYDPRNVRSPILRYRFDPKGSSEEMVHPENVIVEGVNEFGRVDDRLLGKKYNRYWILTIDPTKQVYTNGTAAQ…
g93.t1	MVQFYADSTLQKHHNHAFQTVPITNQDTVLPPGLDTKTFERVLVKLREVVGDDNVAVGEGLRDFRDPYPLQVDENQPSAAACPISVEQIQGILRIANDFSVPIWVCSQGKNFGYGGPAPRQSGSLVVSLHRMNRILEVNEKFAYVLVEPGVTFFELHGYLKARKIPLWVGAPALGWGSVLGNTVDRGIGYTISGDRHRDIRSLEAVLPSGEILRTGQWAVNNSPSAHVCNNNFGPQIDGLFLQTNLGIVTKLAVGVDLAPPAFMNIKLHGPQVEDLGPIVDSMQQLWLEGVLQNHGMITNINHFASHDLPKHAHQKEEGPLLPDTITKLKEKYRTGYWRASFDLYGTPEIINARLARVKAVFATHTPDLDLETTFFEGKDGGPVDALDVGTLSAGVPTM…
g94.t1	MSCSACYSGHDHAGPTTGSEATMFELDVYITEPPESSAERSQNVIVLFSDAFGWSTTNLRRLADSYARRTGCRVYLPDFMYGGALPAWVKSHMDRITGKSSGIRDYMMKPILMIQAAYYIIPFFIRNPAHKRYGLAVDFVSRLRAQLPTGAKIGAAGFCWGAYATTHLARCDNISNGNLPLIDAAFTAHPSEVKVDDFSGIKVPYSLIIGDIDFAMKIEDVKKVSEILASDTTLASEVVVLPGARHGFAVRGNPNDASEREMADQAEDQLVRWFSKHLH
g95.t1	MTDRTPTTNRALWLHSFSSPLKMVDLPVPHATAGSAVIKVLNTVIVPYTEEIHSGRLPIFNLSLPLVPHPSHIGRVHAVGPDAVSLRPGDLVYFSPFITARDDEDLFVIQGHHGGEDPMAKQLMDGEWRNGSLQQFQKIPLENAFVLNTERLCDFLGYTPADLHEISFYAMGVGAISEAARVCASETVLIGPATGTFGGVSSEVALALGANVIAIGRSESKLERLRNQLGNHERLRTIVMTGNAEADTAAIRAATPGGRGVDVYNDWASGGLEGSPFFAAAIRAVKRRGRVVLSGGPAGTINVPYAFVMHQDISISGKLGVGRIGIKLTISMVESKLLLLGTRGGATHNLYSLDDHKAAIHAAKESGGFKVYHDVMPNSW
g96.t1	MSSTGEWLTPNLRDYEEPTTTAQVAAITRAASTADFKIRVRSGGLLFVCASLVEDGLPIITSRLNKSVVYDSATNVVALSPGYRIQDLATLLRCLERFLSWGHNQDVGAGAFLLAGGPGVRSSRQGAEVSCDDLVDTIAPALYELPTRLTTGNIRPLDCYPGEADQALGLPQKCYVSVTKWWEGPKHDARNVAWMRRIFDRVVPRSFSDPCEATFSRSAHLRRHQKTHRAEKPFVCQFCPVVSSRRDVIVRHTRNFHPDAVPNARRQTRTAAKTDDTHRPSAASSLSSERSVGSVPARQPMHQSQGHTLRQSYSPERSPARSQAELRTTDVHEQLTIALSQSETAVLDQIEGPPQEVSLHIEPEQCELLVQDQAADPDRSQHDGLECHQEQPEKLPSIP…
g97.t1	MSNPVRNVILIGASGNIGVWVLKQLLAHPNHPEVTVLTRENSTAEFPEGVKVFRSDYSPASLEQGFKGQDVALSFLNYDIPFEQIKVIIDAAVKAGVDRFIPSDYGIRTYHKRYEVSISAYKRGIVQYLEAKCGLISWTSIICNPWIEYVCPTSHELNCKSLTSYKCLLDGLLGFDLGKHEATIVDDGNSPISGSTRSYVAQGVAALLSDPAAYHDSKNQYVHIAGHSYTPNKILSILEKLSGEQWKTEYVKAEDMKAEGRKLIAAGNPWGMALFVRAVTCSRSPDGEIVGDLRSLSPWDERLGLKLHDLEDDIKGTLAGQFPMIHQPPVIIP
g98.t1	MSSHSVVQAISPSEENKKGMTDHNECDTSSHEHGYEDAELEPEIHWRTYVALLAMGLINYVAVVSLQAPPAVLSFIGNSLNAPDTQTWIPNAPNLVCGAIGPILSSASDIFQARKNILLIGCMMGVIGCAIVPGSSSISRVIVGQTIKGFGYATTPLLYAIPSEILPNKWRPMAQGIVNMAASCASVSGPLIIGALVEADPVRGWRKYWWIEMALWAASLISIFFGYNPPKRKTQDDSLSWVQKLRKLDILGSLLLTAAVTLILVGLNLGGGQYSWDNSRVIATIVVGGVLVIAFGVYEWKGTNSGILHHDLFLPGKPNGRTFAICTGLFAVEAIIFISFTIFYPILTQALYESDPLKIVARGTPYWVAMVICTPIWAALSSYYRDVRWPMFGGFMIWT…
g99.t1	MRCDVAITAFLASGATAAAVKKGFVTTKGTAFKLDGKDFYFAGANAYYFPFNDLAADVEKGMAAGKKAGLNVFRTWGFNDRNRTTVAGGLPQYGGEGAGPSPNVLQWWNNGTAEINLAPFDKVITAAEKTGMKLIIALTNNWADYGGMDVYTTNLGGRYHDDFYRDPKIKAAFKKYVKAIVQRFKSSNAIMAWELANEPRCGADGVRNLPRSESCTPATITAWIDEMSTYIKSVDREHLVTWGGEGGFHVASDDWAYNGADGGDFDRELALGNIDFGVFHSYPDWWSKTVPWTVQWIKDHAAAGRRAKKPVVHEEYGWLTDDKRLEYLGKSDNQTRADVLGLWQKTSLKEKMSDMYWQFGYSGFSYGRNHDDGFTIFLEDAEATSLVYEHAKKVNALN
g100.t1	MCRYTRIVWNSCDHSVLSSSPEHTLLCPQATQFKLKQGVHRAPASCFPLGDDLENLTGGDCNGAVVHTNAVFDFCDTCKENLDLDAALPDSTASLVEEVGEYAEDDLQQLAIQRDCLLACEQESLTAMAAFDTLSTHRSSHLKSALGAIRNSYIRTLLLSHGTTKYSTFFIRAFSACAQLLHTLDLYIALRVPTPLFSELFGLVGTKLQQAAKRLRTFTKLTNCLDKYEPATNAYEAAVNKYADKLAVRLGQPAVPDVCAFAHLVRDVPVYVQRALQTRECVGRHVIRELEARADRVCTPKAFSARERNTKGLRVNIEIAENPQPDTKDVPRLRNAGDTLEVMYMPGLETRGRLSPLGVGRGPWWVRGVLEQHGDGEIAREEVTVLSRGQTAQEPHISK…
g101.t1	MSSVKSRRFLPRFLRRSSATSTATRSNASGGNDASPRTPSTLRKSLSLSKLAAHSATELRGEALHADAERDPRLARSEVQKPEGRAEHLHSHPHPRSQPSHHTNTNTNTTTNTNTATNTATATTTITTATTTATSSSSPSPARTRTSTTASTDAALPTACPQVTLEAPTPIHPPPVAAAVVADDASALSALASNAAPTACPQVTLEAPTPTHPPPVAAAAPVADDASALSASASTAAPPPASPLRRQSLVAPPPPADHAAAAQPALPALSALSAAMLHRKIWVKRPNASATLVQIGEDDLVDDVRDMILRKYANSLGRSFDSPDVTLGIVPRDAGPGHERTLGPEEHMCRTLDAYFPGGQSVAEALIIDVPVRRTPKPSPRVPLYYAHHDDAQHAQTEY…
g102.t1	MQLWEVGFKRRGEADVSVLADRGGICLKPPQQRLQPPAGTLLKQKEAEEDEDEDDEEEEEEEEEEEEEEEEEEEEEEEKEQKTVCRLGQQQ
g103.t1	MDPREVAIQSAIADLNSGVFTSQRQAAKAYGVPRSTIQERLSGRQPNAIAHHQQQRLTPEQEQFLVNWILEEDSRAQPPSHPRVREMATLILHMNGDYEPLGHKWVTHFITRNPRVASIVGRKIESARTTAANYETIRAFLELFERTRIELGIQYEDIWNMDETGVGLGVCSNSRVVASLSKKKAYVKSPEDREWVSIIESISAVGKKLQCLVIFKGKHLQSTWFLAQGSKVYLLYLPPHASHVLQPLDLAPFLVLKSRYRSGIRALSALDDAAPIKKERFVTSYNKARDEGLSERVIRAGWKAAGLCPYNPDLVLLSSQVSGRPITPPPSTQALDDVFATPQSSQALYKAQQLILSESHSRSTRLMLGKAGKAIARANTRAARLEFENQRLKYQLDSA…
g104.t1	MPLDDRHASRRPPCLSTTTKSTVCGSPTGAASDPPSFFGHGQARANEDVVRISFTSVKGNLITALGFVHAYVQLHL
g105.t1	MTTMMTMMTMMMTMMMMMKMMIMKMMKRKKTREKEEDGEEEEEEEGEEEEGEEEEGEEEEGEEEEGEEEEGEEEEGEEEEEEEEEDGEA
g106.t1	MATVNRLLHPIEHHREKKSGARQPSIPLHDRNDSAMDKPREAEKHTLAQWEAQRSALTPDEIDKDPEHKPVGHSSKVLRQEDFELIKTLGTGTFARVWLVRLKDAQQGDQDKVFALKILRKTDVIRLKQVEHVRNERNVLAKVAGHPFITTMVASFQSMDALYMVLDYCPGGEVFSYLRRARRFNEPTSQFYAAEIVLILEFLHEREGVAYRDLKPENILIDAEGHLKLVDFGFAKKVENRETYTLCGTPEYLAPEVIRNTGHGTAVDWWAFGILVYEFLVGQPPFWDQNPMKIYEQIVEGKVRFPSAMSAPARDLISGLCTVDVSKRLGNIAGGASRVRQHEWFQDIDWDKMYRREVQGPIVPHLRGPADTRNFDDYEDESGNRDPYTKELSDRWDEY…
g107.t1	MSGEIENLAPSFAPFFGMSGIFFAMTFGCMGAAYGTAKAGVGIAGIGTYRPDLIMKSLIPIVMSGILAVYALVISVLIASDIKPPPEKAYSLFAGFMHMGAGLSVGLSGLAAGYAIGIVGDAGVRSFMRQSRIFVGMVLILIFAEVLGLYGLIVALIMNTRAAG
g108.t1	MGDGRWVMGCRRRADDSLADDDDLVRGAMEPRPSTAARSPPHSGTAAERLVCSPPAANSTSSPSCRLPALARPHTTPCSPPPRSTTRPPGPRGPLAGETAPAPAPAPAPAPARILAPRAPGPAPRAPGPAPRAPGPAPRQHLASTSPAPRQHLASTSPAPRQHLASTSPAPRQHLASTSPAPRQHLASTSPAPRQHLASTTAAAASSSASAASTSSSRPAARLRCKLSTPAPAPAPAPRVSVPLALRPLHATRTPSVFLGEPADAHHAGGPPQHAQPTGGARDAAFANIFGASPAMAGRSQTMTSHSHARIPDRAATMSAQTADMMQRAPPMRQPVNGYGYDRRPPAPYDQRTPSAYDQRTPSAYDPHRPQTHDQPLQGHQRPMLPPNGYHPDPRSSQP…
g109.t1	MPPRIVYGKKATARPVSASYIKFLSPGEDQLFSSTNKEEVQTQTNKGSSQSARTTEERIQDELVALEAQLGGLAIDNDIIKQDGLPVEKKLTSRSRKVLEDRDANTVPKKTSEHIEKPDKAELKGTTQPTELATPPQTPVARPRKKRSKPTTTKKRAQPPTPESTPEHDDVHVRYISPLFSFSDGKRITTFEQWSSELEPHFKITKIAEASFSEVYRLSAISATAGLGEESVLKVVALKTPPEAPLPCQTLERAIRDRKGQMAKELEEREEKDAYKSHVADVLSEVKLLQNLNQIPGFTNFRALTVLQGRPSSSFNNAWKVWNKARPRGKKSYFPDPSKKTSYEDTQLWAVIEMQDAGMDCEKLMESEGLGTIWEVWDVFWGVCMSVAKAEEACQFEHR…
g110.t1	MKGFSALLLLVFAPLSYAQSQNGTDVLAFAVKNLPPCALNCTLTIVKSSTCALTDIECIKGNQKLIDNLTTCVKASCRPKDALTARRFLTKLMDAPVRNKTMQGTLTSLIVGGMAVLAYILRIVARLTWFGGNWGFDDWVMTAAIIITIPLTACAILLNELGMGTDMWLVSFENITKILQIFYYTELLYLASIALTKISVLLFYLRIFPHQGLRRIIYVTIVICAMYIIAFVTATALQCLPIRFAWERWDGEHHGKCVNLNADAWASAAVNIILDLVVIIIPMRELSKLAMSRWRKIGVMLMFLGGGFVTIVSILRLKYMIQFAHTDNVTWDYLPIGYWSAVEAHVGVIVACLPAIRQLQRSICERIWPKQDTARRLYYEENSRDSNKKNGSKYFKSRI…
g111.t1	MGPMKRHHLLPASVLQPILAVDPTAFPTGMAKKAPFQHIANAANLGCRFCSIVRDGILSFADGEEVETVALAQNMESRSGNDMKKLGHLYPLSVKFQTLNRSTELIFYTNDGFVTKLMPHFTTAAHVSADPSSPECFLKAREWLNCCLQNHGSLQCPSVERATLPTRVICVGDEVNQPYLYESKPGEEGVWAALSYCWGKTKVVTTTMASLPRHKSGIVLEDLPKTCRDAVLAARALSIPYLWIDALCIVQDSSSDWQREAARMCYVYENANVTLAAPQSASSEIGLFLANPNRGTTRVKIDIDGRIGTVYVRKDLSLPMFPMHRHRGDPFNTVTNNTGILETRAWTLQELLLSPRTLWFGSAELGWSCRSSTACECEPEQTSEHMQNDEEFGAHQTLR…
g112.t1	MPIRSEWSLAREGVTGDTLTRLLQLTAFNPLITLPLFLAGKYTFDGGRVVAGHATAWKHLKTLVALGLLDRLSRWLDNAVTNNWSNDTYVWSQEVVVVTGGSDGIGKIVVHLLAEKGIKVAVLDVQEPTYEAPPSVRFFQCDLTSPSSIGSAASSIRSTLGNPTILINNAGVARGKTILDTTEKDLSLTFKVNTFAHYYLTQQFLPHMVANNHGMVVTVASLAGYVTAPSMVDYAASKSAAIAFHEGLAAELVTHYKAPRVRTVLMCPGYTRTKLFEGFNSKALFPETVAEEIVKAVLGGRSKHMVLPELSWAIAPKLRSFPLWAQYGARKKMDNMMRGWKGRQVVQPSEKEEVGEKKVEDSTVLVEGE
g113.t1	MWSRFTGKTDGGSSAPKKDDDEARRRRSDTARSKRDRGSDMRSVVSSASTRKPSSRRTDSTPSTIASYATAFDDTPRARAPTNDHLYHDPRDERYARRDDDDDDDDDDDDDDDDNDGGRGGRDRRSSYAESSVSLARDGKERKKEKEKEKEKEKEKERGSKDGKKSEKRKSMRSDRSSVSQSQSQSHSRSQSQSQSQAGGYRGEIVNEPRALNRSFSGQIGSEGFSQFPGQAGAPMMSGALPVGHQYPASPHMSSHVQDQFPGQDPVQYASGAMPGHNVFGAAAEFYNDQGQSVNNQPGVRPQPPSVIIGQDTPHLVAASAQANPVADTGTGSAADFYGGSTNPPASAPKPPRPTSMPGAFVDDGIATQNPPRPDGSKPSKTNSFPTTAAGLAGGAALG…
g114.t1	MVPTSSPRLPEASLTVYTGGTEELIIETLGRVGQVLNFRLVYDKETGRPKGFGFAEFADADAAASAVRNLNDYEIMGRKLRVDWSNDNGSGDNAPSNQSAPPPMNGQAPEVAQAQPSSTLGPLPPGVDLPPNLTCPDAISRTLSTLPAPQLLDILSQMKGLVMTDPAKATELLRQAPQLAYAIFQSLLLLNLVDPSMLGALVETAPAAAAPPVHALPQPQPQPQPQPTPLARPPTSYAMPPGYPPQAAPTPPQPQPYAQPPPQAQAQAMNNDALYAQVMALQPEHIAQLPPDQRNQIMQIRQMLMAGQRP
g115.t1	MSTGVATDTAPQAMKAVSSHPLAPLSASEITAAASIIRASWPAHTDLHFKVVTLQEPPKAQVLRYLEAEHAGESRPHLARKAFLNYYIRNTNKFHEAVVDLTSRRVEHNVLLGPFIHANGDGDEIVAIEKIVLADENVQAEIAKLQLPEGTVVISDPWIYGSDGVNDEDRLYQCFLYLRDPNNAAEADSNHYAMPIPISPVLSTESMKVIRIDIMPTGADNTIKPVEKYKVQPPNEYIPEAQALRTDLKPLNVVQPEGASFKVQQEGTSSVLSWQKWNFRVGFNQREGMVLYDVRYDSRPLFYRLSLSDMNIPYADPRAFDLGDAGAGIMANNLKLGCDCLGSIFYLSSVLSDDKGGVIDMPNVVCIHEQDAGIGWKHTNYRTGRAAVVRSRELVLQSI…
g116.t1	MKSFAAITLLCAALAEVAHGHYIFQYLTANGVKGAQYQNIRRNTNNNSPVTDLASTDLRCNVGGGSGASTTTVSVAAGSSVTFTADQAVYHQGPVSFYLTKVASAAAADGSSDWVKIKEIGPTFSGGQSTWDLKDNYSVTIPTCVAAGEYLLRIEQLAIHNPGSPPQFYISCAQIKVTGGGSKTLTPTTKIPGHVKATDPGFTANIYSGFTSYAVPGPKVATC
g117.t1	MSLLNTNTSIFTLHYSRSVASSLTLFMSAGPPLGQPWCANIGSNPNINRDPPPPPLNVVQGSAPPASGGQAFIERQQSPIYGPPVPIGVAPSFGIAPPFGAGIGLGMLPPMPFMDPFMYGGGGPLAPIRSGNFIPGAQGGIGFGLHAAGGMPFPPPPPGALATGVVPAFAPAAPLWAGGGLAYGNVPTVAGGAMGGMMGGMISPMVGMGGMGIPGYRPAPMAMDGNGGAPPQPEQGDITQIPGGVPPGITHVEAGEHTIFIQIKGNVCPWLSPGAQFLTEVLNISSSTGLNRLIQICNNNAGSDDCENLAITECIELGNGLWEKGQTFKYGDAVARVLTMKDAGWDNKRNRTGGQSLHIWLHRI
g118.t1	MFMLRNLSKFVFGDSSKETIVEISQGQLYLVRPRSVKGYSELIFKDAAATVRRTGQEFQYQLVVQRAYEEGEEDLLAEEGGEDAGLDALAGDKDEKTFLLDEGLQFRTDVRSTGEKIFAWRDLSGDVDDLWEFVCDPSVKPETAALFERVALQCQYERKFRRSHEHATDDDLEALAYYEDSIPDASPVPSPTRKALELPPTHEDLFPNTTKEVMVKKTTSKAAAPQQEEEATAAPLSAAQPKALDLLAEENAELHLFDFPTGTFKLQDANVTATVTEIGDWQYWLHIVGDEREWLGQPIVDDINPVFNYEFKSFIFNHYLEDGSAYSWLLRFKNQENLESIQNGVMQALWEHLNQVKWQKAKDTDREYVLEAFQDMTMEDAPEEEEEEDEEEFEDANDQ…
g119.t1	MAVNRIRGAFAPPKKGETFELRAGLVSQYAYERKEAIQKTIMSMTLGKDVSSLFPDVLKNIATGDLDQKKLVYLYLMNYAKSHPDLCILAVNTFVQDSEDPNPLVRALAIRTMGCIRVDKMVDYMEEPLRKTLRDESPYVRKTAALCVAKLFDLSPSMCLENGFLEQLQELVGDPNPMVVANSVTALVEIMEAAPETKAMVITAQTLKKMLLALNECTEWGRVTILTTLADYKAVDIKEAEHICERVVPQFQHVNPSVVLAAVKVVFLHMKNISPELLKSYMKKMAPPLVTLVSSAYEVQYVALRNIDLLLQKQPDILSKEMRVFFCKYNDPNYLKMEKLEIMVRIANDKNVDQLLAELKEYALEVDMDFVRRAVKAIGQVAIKIESASEKCVNTLLDL…
g120.t1	MTHTSTAKHDASQAITCIPPLPTEIWLQILEHDDPKHMWLSVRNSSSMYRDCVERLFTSKYLPKLSIALSLPRRDPATGKMRWRGDPIPGSQLKMTYSRLSEDGKHLRLESPAVVKDRSSERTLEELKDAGTLPKERLEEAPAYVSMSSLSFAGLTVDVPVQVDWDEARKIWVWDIEWSKLLSRFYDAKEKQAKRWPSTSREITKHERRTR
g121.t1	MRFSTLFPMLLVAGVAKAQFGGFGGGGFGGGFGGVNPGQQGQQGQQGQQGQQGQQGQQGQQGQQGQQNQQNQAQNGQNNNNNNNNNNNNNGGGGGGGGGGGGGGGNANLALDPNNVQANSAATGLEAGAEAGQAASDTDNANFINVCSGKTLTNGLQVREGSCNGIPMGEIPAANQMVSAVFTSPQNGDVVPPNTAMKFSVQIANLQAGTFTNPDNTYYAAPQTLSGGQVVGHTHITVQDLGNDPNPTQPLDAETFAFFKGINDKGNGNGLLSADLADGLPEGFYRVCSMTSSSNHQPVLMPVAQRGAQDDCVRTIKVNRANKVNKDSSKVNKGSSKVNKGSSKVNKDSSKGSKVQVVVDVDVSGGPDLLPVGLSPRETYSHGMARVVVRGNTSTASVL…
g122.t1	MTPNMASPLRLDFVTVDVFTGKQYEGNPLAIVRIPQSASVTQEQKQRIAREFNLSETTFLHENKPDAKDDKWRVDIFMTSKELPFAGHPTVGTACYVLSRIAEERGITKGVIEANFTLKAGPVGLRYDIARKRAKAAIPHDVHVHTKRWSKDDLFKLQPGLAAAYEQSQIKTQDDCPIVSIVKGMTFILVELESVEILAKVSLAGQSIEIDGLDQGWDDTFIGTYFYVRTGKSDGGATQLRTRMIEGPLEDPATGSAASDLVAYLSLNEGKAGETLKYELVQGVEMGRRSEIFIDVVMAKNGEIETVYLEGGAIQVMEGRLTV
g123.t1	MSSTHSRSGSDDTNATSISYILEHVLQYPGSYEIPLRTMYTLNCVPRAQPLPKDLARGHTPSNSNGGASPTSPQFAWNSTESATMSFTSELMTHLNKLPLQPSSLPPTFIVNFVSRCFHPDLNLVDFPQALTALDYLRDLENRRRKEMVAAFERLHIHPDTYENDMESMAETFPGIALWVRNVEAKNRKAESYYAQIWIGVRRWIMINELSIQPFNKLNCMGMLNTLLPPLHDSSKLPSPVLNCEVLKEERDSFFDYIRLVQKNGPDVLKPIMNHAKDPGDETSWSAIQRTVDKYLRVTKNMIDDCLATTGPESFKAYAEERKGKKTDSGVSFGAERRPSVGSTSHEQHEEEPMPSYASAPKSASKLERITREFKRMRVKPRPSVEEIVQVNSRTDTDY…
g124.t1	MSTSRAANPLQQMHDDDDRLAPPSSAQSNIASKRAAKLHPLALSTAAAPVRRTFFAPWNSSSTGHQRAENRLSGSTSWRASRSLKLGEQYKGGLAGGKRIADAVGAGSEDFGKDGRKANGCWEKGAQGLRTDGQQSLADIWSSSKAGKKSVSEKKILLAESRLDLDQDTLDATLEPQETPIFEGLCFYVNGSTAPLVSDHRLKHLLAAHGARHSIALGRRTVTHVILGTANANGGAGGGLAATKIQKEIARTGGKAVKYVTVNWVLESIKTGRRLPESRFAPLKLAHQNQGSVLGMMNRSNATRITHG
g125.t1	MGIKHLFQLIQEHSPGAVKTGEIKNQFGRKVAIDASMSIYSFLIAVRSDGQQLMSDTGETTSHLMGLFYRTLRMVDNGIKPLYVFDGAPPKLKSGELAKRFQRKTEAQAGMEEAKETGTAEDVEKFSRRTVRVTREHNQECQQLLKLMGIPFIIAPTEAEAQCAVLARGGKVYAAASEDMDTLTFDSPILLRHLTFSEQRKEPILEIHLDKVLEGLNMERKQFIDLCILLGCDYLDPIKGIGPSTALKMIRDHKDLEGVVEHIKNNTKLTIPEDWPFADARTLFLEPDVRPADAPECDFKWEAPDVEGLVKFLVEEKHFNEDRVRNGAAKLSKNMKTAQQSRLEGFFKPVEKTAEEKASLKRKADEKLEAKKKKQKEDAKAKKQAKAKPRTAA
g126.t1	MTTPVSFDWKDPLNANSLLTEEEQAISETAESYCQERMLPRVLDAYRNEDFDRKIIEEMGGLGLLGASIQGYECAGVSSVAAGLITRAVERVDSGYRSGYSVQSSLAMGGIEEFGSEELKERLLPQMAKGKLLGCFGLTEPNHGSDPGSMESVAKPHPFKEGYYSLSGSKTWITNSPIADVFVVWAKLQETGKIRGFAIERKDCPPGTLETPAIKNKNGLRASITGMIQMDEVPVPKENMFPDVEGLRGPFSCLNSARYGIAWGTMGALEDAIARTREYALDRKQFKGNPIAKYQLVQKKLADATTDAAYGILAAYQVGRLKDEGKAAPEMISMIKRQNCDRALINARTLQEVFGGNAVSDEYGIGRHVANLFVTQTYEGQSDIHSLILGRAITGIQAFC
g127.t1	MALKRINKELTDLGRDPPSSCSAGPIGDDLFHWQATIMGPSDSPYSGGVFFLAIHFPTDYPFKPPKVNFTTRIYHPNINSNGSICLDILRDQWSPALTISKVLLSICSMLTDPNPDDPLVPEIAHVYKTDRSRYESTAREWTRKYAI
g128.t1	MHAIRPRPTCRAHNNFSPSIALWQHFIAPNERLQPWQLKSPFATEAPRSHDDGVLVPDRGVGASELKDASGSILIKRFKTDRGNWRSRDLSPKPGELGEQKQGVSRRGHIPGTRQDAEKLLIYAKEAYEKASDYQGVTVQPIRPHGLFKESHLPWASSNKGAKSGEDRLELEIQAFHEYVRPNRAESIARKHVIEQVRRHVQKILPEYVLEVFGSERTGVAFAGSDIDLRLVPKHIMADTAQAKLPPTPEDRAKRRRDLKRLHRALLHKHKHDYMLPTVRWARYPLITLQDRASGLDVQLVLSNDTSVSRELMQRYMTEYSYLPQLYSVVKAILDIRGLSDVFRGGIGSYSLFMMVVASLKHKPYPGNRVGGALTFFLRFWSSFKTKGLGVSIEPPEFF…
g129.t1	MAPTPRPTNDGAESFEPQESEHPALHPSITNVPVTPGFGLNEEKELARQTNNNNNNNNLPFDPETATPGPVWGDKGSYFPKHQEKDRASSTEQAEGARTGEELLRRLSVVSDSSKKNDLVDIDPRAAHPGLNLSGRLISATFAVPYNLGYSKGNDWEMNPRHGTSALFDSFSYLASSSSPWNHTLVGWTGEISNAKAAVETPIQPTVNKAAAPIPVDSKKPAQTPQQPSGIRVGREDRERLEKQLERDHGGKIVPVWLVDEVDDGKDEYVMKDQSRWRTYAEHELYTILHYKQNEPADGRAARKSWADYYRMNKLFADRILEIYSPGDIIMVHDYQLMLLPSLLRQRLPNIYIGFFLHVPFPSSEFYRCLSRRKEILEGVLGANMIGFQSFSYSRHFSS…
g130.t1	MGGVLVMAAVGGGGGGGGGRAVEQGGGVLVMAAVGGGGGGGGGGRAVKQGAGCHGDANHVSYLLDEGWGGRSVGRRLAEQGAPSDNSERDGWDGGAAASRARGVRALEARGEAAERLAERLAWAFAASRMSQAV
g131.t1	MGLFEKMQARLELYRLEQRYTRRDKRSTFISEAQYVDGEYVYASSPSPSSSTKSAGTTSSRRFSKMPTLPAVRIRELARAGTSRS
g132.t1	MSFNTESESAKSASHSIHGVSTEPAVSQDAKATPQTGNQNQNIMATIENDDDRLLVKIGYTPVLQRHFSRWSTVSYAISILGVLGSVPATFGVPMSSGGPATFAELVSAYPTAGGMYYVTKHVVPPEHVAAWAWIIGWCNFLGQAAGVASLAYTISQMILATAVMHTFDGGEATFTPNAHQTVLLAIFVLCLFGAICSFPTNWLHRIILWFAPINIIASICICIALLILTPNKQSASWVFTTVTDGSGWGSKGFSFLLGFLSVAWTMTDYDGTTHMSEETHDAAIRGPVAIRAAILVSGITGWMLTVTFCFCMSDYEGIMSTPTGLPVAQIFFNAGGKTGGTIMWFFVMLVQFFTGCSAMLANARMAWAFSRDAAFPFSGYVMTILFWSKVNSRTHTPV…
g133.t1	MLILESSETHERCLALAIFMSGIPIGPAPNPTFTVTLYRLRRIVRIIGAFFVGVFLIFLCNITLYKITLEENIQSCSDLLRLEFSQNTEWKRLISCEHHPKSMANGEISLAGAALAVALTALAIAVGQLLQQVFSTAEGYRRCQHSVLGPWARKTRLTWRRSQFRFEVKFTTPDIILQTNVPMPVSRKMLPRLPVKREVVAVDHSGANATSIPVEGREETSTDQVGVGSTETSHSGSIAHPSKILSDPSLAMIRGSLESIGVSEEIIESITSKDGNFELMCDLRSMFCPFLPLRGSSVTTMSNVLCTDVETFATHWARILLRRHLEQYILQEFQSTHLKSLLGHLVTYAARWPHFFYESLHFQMSQQSRCPADLIEFAHDVFDETTAYFVDVRKRCGIE…
g134.t1	MAYKTTKYSRQTSCYISAALFWGPENSSSGSCATIWPNLRVLDVSTGLERSTGDYWLRSAAEYPYRERYDFPEPEDSDSDHPDSEMWRLAGRWPSRQFRTRPEPKFFDELAISIAHAAANMPKLEYLDLEFNASHQSLLDPSITSFHQGMRRTGGPPIRGLGILLSCV
g135.t1	MDDKAQQSQSQSQSQAQSQSQSQSQAHAPSSLMPDMQDTPPRADVDEILRRKRKAREYKACYPCRQRKVKCDQTVPCKTCVVREHPELCTYHPPSESHPPAKRISMGLGQNGHDFNVNGLVHIHGGTVTLPREDWEHICAKLQTAEKSLNELKNSISSVSEVAPPLNGFSPSTSTALAAAAPIDGEQSHVRTQGIHTRNDITGQTIHIGPSSVPALVMALGRGEDAQWAPGLQDLLGKKSMLPIFGLDNESATYPFVDLWGLPHGSISRATELANALPSDSECLSFFRCYRETAHAVYPAVADIEGVESDLLLFLINRASSQGASGVTDQQIYGKDFHWIGLVFAVLASGCQCSTLSRRERELTSQVYICCSFECLRFTNFLSHANIENIQTLLILGNV…
g136.t1	MAEEGLVQPKTRDFSSSSNPARTSSDTSASEHTHVDHEKHRPVVRETTHDGADVVNLPIRTLSNDANLEEYTQETLDGQIARIHTNKTGKIERYELVTWKVDDPENPKNWSKAYKWWCTMCVAITCFVVAFNSAVITADLEGVSETFHVSEEVSLLTITLFVVGFGVGPMAFAPFSEIWGRRPIYGVTLFFAVVFTIPGAVAQNIGTLLVTRFIAGVAFSAPMSLVGGTLADLWKNEERGVPMAAFSAAPFIGPGIGPLCGGFLGDAAGWRWLYWIQLILSAIVWILITFTVPETYTPTLLARRAKKMRKETGEDKYVTEQDIDTRPFSQRLTLFLIRPFQLLFRELIVFFISLYMSVLYGLLYMFFVAFPIVYQKGKGYSASSTGLMFIPLIVGVLLS…
g137.t1	MSYETDNYEQRDRSPRRRSRSPRRSRRSYSPRSRSRSRDDYRRSERRSRSPTGGAQGSGNYQSYGASRGGAPRSTENKDNMMQSIRDSSQQDRRVYVGNLSYDVKWHHLKDFMRQAGEVLFADVLLLPNGMSKGCGIVEYATREQAQNAVATLSNQNLMGRLVYVREDREAEPRFTNPSTSRGGFEGGIGGRGGFQGGFGGPPGGAPGGGGRQVYVANLPYNVGWQDLKDLFRQAAHTGSVLRADVHIAPDGRPKGSGIVAFETVDDARNAITQFNGYEWQGRNLEVREDRFAGNAGGFGGRGGFGGRGGFAGGFGARGGFGARGGFGGPGFGGRGGFGGGFGGGPGGSPAGPGFDPNGPSNPPNPFTDFAASGGEPSNLIYVRNLPWSTSNEDLVELF…
g138.t1	MSADFCAGYVSGAVGIIIGNPLDLVKTRLQAGSKSAADASTSTSTAAVAVPRGFGWHFENAGTVGATAPILGYGALNALLFMTYNRTLTLLSESPAAPDSFAKVFLAGATGGLASFVVSAPTELIKCRAQVSTEKHATSWSIAKQIWMRDGIRGLYYGGGITSIRDAVGYGFYFWSYEWSKQAWTSPDDTGRETAMKVLMCGGFAGIVTWATIFPLDVVKTRVQTQLLQPAPGQRGEQQTLLHAEGRGPRMGAMQIARRAYQTEGAGVFFRGLGICSVRAFIVNAVQWAVYEWMMRLLQHP
g139.t1	MPSQPTAQGWDFGSVFDLIDSGDVHDVGSPKLETRTPLVRPSLAAPDGGIRLGSFVKLFEDLGIAEDAPLPPLSPLDPDSGISNAGDVLLPSPQFELDVSLSEPTTSTDDSQTVLTKKQRKRARQQAEKEQEQKQQESRQQEQKHQAKGPFKEAQRKQLQKRLESVFEARPVIATAAPTPTPSLPLKITQIEQTPSKKSRSRSPSKQLQSESPTKPASSNSSIKPSRPTSPVKQLRAQSRSNVGAKIRPATPVPVMEVQQPIASPQKKAPETPAPVKSQRSAPKERLSSTTQPATPQVQPTQSHHAHIAPSATPTPFEYGSGHGLVPRTVRPVTLPRSSQSTVIAQPTTPTRVPVPTPARNFTTPYNAPEAITVRPSVERHLHFHAKLLNTFPEDAKYI…
g140.t1	MLSPTKVAGLSAYIPHRVRRKWRATKSRIHSRQSVTSSIASLETSWSPSDTIKALRTHPWSIYDAQYLFLAIVAIFSLSVSEAPGPFAKTFAATALLTGILVPATRQFLLPLLPTLTWLFLFNSCKYVSPEYRPAIWVRVLPALENILYGANLSNIISAHQHTVLDVLAWFPYGLVHYVSPVIVCGCMFIWGPPGTLPTFARAFGYMNITAVLIQLVFPCSPPWYENTYGLAPANYSIHGDAAGLKAMDRILGFDMYTSAFQASPVVFGAFPSLHSGWATLETLFMGHVFPKLFPVYVFYTMWLWWSTMYLQHHYAVDLVAGSLLAGVCYFFGRANFLPRIQPDKEFRWDYDYVEIGDPQDGAGYSMLDIYEEFQPQSDSDDWASGSSSSYSTGGRSPV…
g141.t1	MRLAVRWFPLLLCCWVGRAGAAVDCAPSSGTFAINSPDDVATLNQCTAFTGNVTVAAKQIEDITLNGLKAVTGTLQITDVEGVLSISSTTLESVSTLILKDLPKLMTLTLPALSNFSKLDFTGLTALKGCEIATGAVQRDVHEVNIVNTALETMDWLKWPVASTLTIAANTKLTDFKLPYDRIAAGSSYQISINSALTNLDFSQLTGIYGSLMINGNKDSQLGFDKLETIDGYVRLSGPFTNITMPALTDINGALRAESSKNILSFCNWLSVQNRLFGHYDCTANGTNPPTASKTTVTTSRPTSAVTTTSASDGDNTSYNDESSLSTGVIIGIAVAMVVLISITLTASALFFRRRSRHKAQATAISEKGKTRSSSTLGEETNAPGVRYELGGRKSAREL…
g142.t1	MEIINVFLALMSFLAVALAGQDRACKEGSLKCDGGSPGGAVFVCNDGVWIVLMACRSYENCVKKPVPHCTWASADAGSADSDPVPGFEGLPAEVSAAADDLKNATVADTVESSTAANNGSPNWNVCTPCMRHNDNCRQSCTFQGDECDIACGWKTSSVNLTTGDLRQPTVSCGDFCKWPYQ
g143.t1	MKTFTTILAFTGLSILAAAAPPGTQGSCGNCDTLPGPQTGGNAQIPLRSSANKSDGKAYKCTTFGNEVRISSCTNQMCGLCMIFEDNDCQGDILHWGGPGSAFEGKGARSYFCI
g144.t1	MKYLTTIFALMSLTTLAMAAPAEPAHNSQLIARETQPWAPGSYCGKCVLQEGGQLRELRTSVPVNKCNTLAEDEHYSSCTNQYCGVCVVFKNNDCQGDVVHSGGPGAGSFDAKSARSYYCM
g145.t1	MKFLGVTLASLGLASAASVSNKQKVSYDDWKVFRVNGPSNTAKFQEVVNKLQLDVWKGKPSSGDVVDVSVAPEQLSAFEAATKDFETKIMHENLGASISEENTFSTYAAGAAPSATWFNSYHALADHYQWISDLAAAYPSNSEVISAGKSLEGRDIKGIHIWGSGGKGSQKAVVWHSTVHAREWITTMVNEYAAYQLLTSTDATTAAFKNKYDFYIFPVVNPDGFYFSQNSNRLWRKNRQTTPTASCVGRDINRNWPHKSWSQAQGASSSPCDEDYKGPAAGDGVETKALKAQLDSLAAGKGIQLYMDIHSYSQLWMYPYGYTCSGTLPNSASYASLTKGAIAAVKAVHGTTFTGGPICNTIYQVSGDSVDYAIENAKAKYAMTVELRDTGTYGFVLPA…
g146.t1	MGEIEEVKDGRVVRETSSSSPSDLSPQPTIDEGEAQKKKTLWQKFITPGSVLQIIAAALFAIAIGLIVTTQVSDIPDAAVALLAIPGQLWLRALRAVVLPMIVTAMIMAVQRLRTMTQGGGKAGKLARWTIGYYLLTTILAVAHSCLLVGLVWSKLMTVVGGEQLQVDEADQETIDEREAFAIHEVVVDMFYSLVPNNVVNAMATDSLLAVLVTAVVLGYCIKPGSALIRAIEEIEQIIMEIITVLICLAPIGVFFLIMPNLFRLDIAEIGINLGILIGGTLCGMILHLFVLIPIIFFAMTRKNPYTLWIRCSPAWITAWGTASSAATLPVTIRCVLAQGVPVTVTKFAVPLGCLINMDGTAIYFPIVVVFLAAMQGITLNAADYIVVVLLSTLASIGT…
g147.t1	MFAKSIVTVLTLAVAATATLDPATSNTKGKYPSSPSCSVTKTSKAIQAAECSHNTRVSGKQTFAVFTQDHQYDGNHGYPYGTCEAYTCAPGTAMKSSKDKWTFFWSNAGESSGDGAGCIKSPKDGTCGCENSDGTFVYGASNCK
g148.t1	MELPALAPSPQPSVRDTLKTSSGLEDDPARAKRAHQACLNCRKRKSRCLLEEQGTIPCLRCKRDGLDCVLGGSNRGGRRVRRKRVDETRPGLPSLTAAAPDDGSFHALGNLGTWSHDAHDTGAQQQQQQQQQHSQQQQHSQQQQQQNQHQHQHQHQHQNQHQHQHQHQQYGDNVQATSSNSSNTDELPFNNLQNPSDALGILARVAGESSSHDEHSHAHHPGAEAGVGRAAAAPGELSSMNAPPPPLSFSYPLLDRGILTVHALCQLLLRYQANYHPFYPLAPAHAFDTTRLSDTVRKEPHLLTALLLIASKDLVNEPHIYEACTEHMKGLVANLAAGGDAGIEAVEALLLLAEWAPYTQRGSAKVGKGEEDKESWMHVGIALRIAYFLALDKYSFRFV…
g149.t1	MRALTRAFSSLSHSFPHPFITPSTTTAAASPRFSSRTKPLPHAHHYLQPSPRAYPGRGLHDAGTARRYYSRIDARPFGPFAGLDASTRPAPNMEELSKTLKGIGLESVPQEPNTYPDLNPFDIYRSHITELLAEVSGVDRKIIYPTLAWTAKPENGDLQLAVPALRLKGKDLKAYAQELADKFPESPLVKKPVVTGTFVGFFFKPESLTSIVLPLIFKAGQSYGFNKSFGLKEDGSKKKMVIDFSSPNIAKPFHAGHLRSTIIGGFLSNLYEGMGWDVVRLNYLGDWGKQYGVLAIGFDYFGSEEELVKNPIGHLYDIYVRVSNIQKEEADKVKLLKTEVTKDKEEGKDTSAKEAEITKIETEGIDEQARKYFKGMVDGEPKAIGIWKRFRDLSIEKYK…
g150.t1	MKWTHKVKTAKEWRKPHALYRIPWNYKSLALGIGGRSGKRDTVTMLWDPPDMWELLRSVIVQPPLQDDRAPVLRAAEAKAASFREKASNCGSAPPALDRNGDNQGGGPPSDSPRMLVWTEACGGSVRIRRMMLRPIAEGGTPWKQLQPMPGQARALLMPAI
g151.t1	MADVARLQAVGGAARSSSRHQNGHTPTPRRSRSGHYSNDIQYAMDFIVQPPRSARVGHTIPGSIIVRLRTTNTYPDDAVVDSPNLMAVAALVPGPSSTASSDPNVLNTLLAGHRIDSIHPFADDEADGSIASMDMAGSQGVGYMRFPDLAVRQAGTYRIRITLLRFGSAVQVVDSSPVVVQNAGPATAYASYNGRYPVASY
g152.t1	MRYSIILGAAALVAASPAPQAFDPNGLDAVATLTQGPPVGVGPAQETAYQPGAAQSQAAAAATATAIAQSAKRSINEKSLKARTFWWSWHSLKQISPAPAPVPSVTSTTSTSTVVPTTTSAPVVAAQTTKAPSTTDGVVPSSCTPVSWTNTYAFTSDSACPTAIEVGTYCGFINPDDPCAPQPAGKGVPPTDDTVNGFLNNDAYKQLAVGAQTPSGYMQSFVNLQGATTGNGYLSYKTLDSYDVATCSKFCDDSDTCTGFNIYIERDPKWNPHQCSCDNPPSTINYKCSIWGQKLTKDTATNTGSGRDSFQVVITGSNGYNKATYTPPTPPSCSRPQNCGKKLLNQAPYCMGQKTFPGPFDPSLCAAYAQAQNAINRKFGIIGAFLSLFGMNKGACIQF…
g153.t1	MSAPPKCIVAYSRRIAVHTRGSHGGLKPCAPFFGLRAAPVLQHAFHSRRVEQLDTGVRSLTRLRPLSLQQRITKVQSTAITRYASHAAAEPHDEETPTSPPFSAGPYSNLTIGVPKESYPGERRVAITPQNVKLLLKKGFSRVLIERGAGVEAEFTDEAYEQAGAETVDRRNVFSEADILLKVRALSVEGEDSEVDALREGATVISFIYPMQNKHVVDRIASRRATSFAMDMVPRISRAQVFDALSSMANIAGYKAVLEASNHFGRFLTGQTTAAGKIPPCKVLVIGAGVAGLSAIATARRMGAIVRGFDTRSAAREQVQSLGAEFIEVEINEDGSGAGGYAKVMSKEFIEAEMKLFYEQCREVDIVITTALIPGKPAPKLITKSMIAAMKPGSVIVDL…
g154.t1	MSLPILFTIPPSNRHEFLVLDGTSKPTLKALNKQVTSTLASSPNCAEFMGKYKASGGASQEVIQEFRVHWSSKEYDYKVWPEFTVVTEENLGAVLELLQREPKSGVLEIKVGKAE
g155.t1	MSPQANGNGTNGTNGSAHAPTENKNGDLYRDYADDRNATSEEVTYTTSNGVPYPHPYEAQRAGENGPLLLQDFHLVDLLSHFDRERIPERVVHAKGAGAHGYYTTTDSLEDLCLADIFKQGKTCPISVRFSTVGGESGSHDCARDPRGFSVKFRSDEGNWDVVANNTPVFFLRDPAKFPHFIHTQKRHPSTHLTHADDSTNFWNYASQNPESIHQFMILFGDRGIPDGYRKMHGYIGHTHKLVNSKGEWVYMQLHFKSKQGTGFITQEDSANYSPDYSTKDLYQAIEKGDFPGWDVMVQTMTAKEAEELWENQKINVFDMTHVWPQDQFKLRKVGEFFLNENPQNYFAEIEQIAFNPAHLVPGIEPSADPVLQSRLFSYPDTHRHRIGANYQQLPVNAP…
g156.t1	MFATPVIAPMNVIPSSYSKHGSRRPEHSLSTYSTGSHFSADSSPATSTLNLTRSRASSDASNSSSSAYSAFSLRSSKHSRNTSTSTTASSTPSVGSTKRTGPFRALSDSLHVKRRLQKKPSSQQVPQCQSDPVSVPTSMLTPVTILGPERVTNLQRADLLIRCRDDDYHVDRSIMCHHSQWFAKVYSKVNSPKMAKRIVDLSADDPGAVAAMIQYCYQLDYGDTRSDSNPALYSVVTLRPHLDTYLLAERYGMPGLKNLAAQKFEKLSIAVLTTVGNEDEFPQSIRDLYAPSRRTRGNELRRTAVKLCADHLGSAVLGIGKEVSGILALIDEIPEFRSDLFKEIAKRWK
g157.t1	MDRQVKRKRAFSQAFQLMAQARHGENNDQTAKRILSYSLGSAASHFQDPYEENKIPSILDYSSVPESIPGTQIRYPPPVNLRYANSALYNYASLQFELYGNGPGPELESSIGVIPSYVEPKRQFEGPVLREAALPTPQIVRGKSIFGPSPYIRPSPYIRPSPYIRPDYNFSSNDLIESYAKPGPAIYGDADSPMSDATTAVGPLTPSALKFSDLSLNSQGYSLPSSSLRDENQVNRATVRVVPTSSFASLFPEIKPNEVIILFDKGIETRKVDKYPLCSASRFFANLLDGPFLDPCLTLCIRLRDDFPYAITTLLHFVETGSYVWDPQAFRKYPRLTTLDFNVHSYLVGSKYGISALRDRAIHAYLSIADHEMKLGFSALSGDCFPDAQIPLSGTSDVS…
g158.t1	MDAASTNTSGQRAFLRTCSKTISPPKNLKHETEEVHDGPRKRRRHAADLDNETSTKTDNFYSPVNHAFYAEHPYRSLDASKRGIRLLKVSRNAMTGERNFTLTEEIPLAVARDTYTAISYCAGDPKDTRKLLVNGLEFNAFASLARAIDETCHYCEVEHDEAHPVLWTDQICINQSNLAERSHQVSMMYDVYENARAVAICLSTSDTGNTESPAIRWLKDIHNHIPALLEFEEDVESSAWPLKWNPDVPENKFESNLEENAPGHEIFREFTQLFRSKANDREFSRGQLGFFDLLQARWWSRAWVVQEFVACRNATFITGYEHTPWMSLATVVSALAALQFATSPKSWSLYSPSTSVDGAKREFKLLDSEVVASSTISLKMCSNPGQPKSTLGSMLHLLD…
g159.t1	MGNGAKAQQKRDRKGDAGPKEAKSQLKSNSAAQTVKCKTCFQTFQSTTNRKLLTEHASNKHSKQFADCFNETDGVAK
g160.t1	MGHHHVQVSRKTRLRAVIAISFCFFVAEISVGFYTHSLALVSDAFHYLNDLIGFIVALVAVQVTERKDAPQDLTFGWTRAQLLGAFFNGAFLLALGLSIALQSIERFIFLQHVEDPKLVLIVGCIGLTLNLISAAFLHEHDHGDGHGHSHAHSHGQPAHNHDDVESLSTVSMQDHHLEHLHLSLAPSKHGMDLGILGVLIHILGDAINNIGVIISALIIWFTHSPSRFYADPAVSMWIAIMILISAIPLTKRSGKILLQSAPLGVKIEDVKHDLESIPGVLSVHELHVWRLDQRKAIASAHVVVSNPDVESFMGKAKVISECLHAYGIHSVTLQPELSVQRVSDDEATEVGSAMTTARLSSEKCGVPCGSVCEELKCCK
g161.t1	MIMRWLLSFVVLAIAAVVKAASFTGNRLLVVLDEQAEREKYSVFLEDLTARGFHTTVESPKGDKVALFKHDERTYDHVLLLPAKSKGLGPALTANSLLEFVKKDGNILVALSSEQATPTAVQSLLLELDINIPSDKGALIVDHFNYDSVSAADKHDVLLLPFPAALRSGVQNYFGGEGHIAVPRAVGQVLGNDSPLLSPILRAPSTAYSYNPKDEAEAVEDPFAVGQQLSIVSAIQAHNSARLTVLGSAELLQNKWFAEKAKLGDKAVTTANREFATKLSAWAFKETGVLKVGKVIHYQDDGASKKLNSSIPESNPTIYRVKSDVHYQVEISEYSNDRLIPFVPAVNDNIQLEFSMLSPFHRLNLSPISQTANSTVFGVAFKTPDQHGIFNFRVNYRRP…
g162.t1	MSGIPPSPRFYQQPLRYLKWASFNKPAYFYSIVVGCAGPILVFTVPSIRRYLGEEPIPKIPLTYPIPKGQRPRPTGFDDE
g163.t1	MNQAEDVEIILGHKRRYKFHSGTLARNSTLFAEMLSERNAAKLSSRARSAGVKIRWMVELTRLPDEQFPAGHLELVELTSTGERADGRSGLVVNENGRIPQANQAFANYESILYAFYNKELAVDDTDMSAALFDCYQLLQISDYLGCTGLISKPIEVALFKHGQDLFRAIQGVPYAWIELAYRIRSELIFRECVVHLVGNWKVFKTKYNMIDRLRDIPSVRGLVENYHHILLEKCKSLELSVLSHYPQVIRLPSEDLPIKRESYGKDILVWMALTFFRHWVSQRLITGKGRDAPDCGYELFFALGNGGDAYMDKSVINQFHTRFPMTKKAMNVLENHLYEFKECIKKVVDDSKVLRSHCQLDVHRFPVKYLTCTEFARDDFPWLKEERETRVMPAKRTY…
g164.t1	MASFAYKTLFEASILAARASDNDRSAIQDYRSHCTYDTCPLSASYWGYRPSLGANLAFLILLGISTLGYIGQGFLNKAWLGFTIAMVCGCALEVIGYVGRVLAYNDGFTENPFLIQIICLTIAPAFLAAGIYLCLSRIVSTFGSENSRIKPLSYPRIFIPCDVASLVLQALGGGIASAKTHQNEDPTLGNNIMIAGLAFQVVTLLIFIVLALDFATRTIGRIRKLGQDALDPRHAKLRNSWHFKGFLIALSFATLCIFTRCVYRVAELSEGWNGHLIKTQRYFIGLEGAVIVAAVLALNIFHPGLCFREALDARTEPKKRSNKTWYGRKRNVATEQSSEEGIRIEK
g165.t1	MNPLKVEDLGGIQGDILLNGLPKKAEIFCFFTIRAAQGFCQNIQKVANSNIATGKDIKDLREQISKLDKGNIIDVAKTNIAFTSRGLTKLANVQTSLQNGISGLQNSAPSFVGGMQKDSERTALGDPVFNNWNLNQNGGGPIDGVLIVAGISMPTVENELKNVLRSLNTGGEVVAELFREVGFEREKLPGHEHFGFNDGISHPQVFGINDSPSLTFKLDDVVQSSDTSNFVDPGVIVVGRHGDENNPKPQWMTDGSFLVFRKLEQHVGKWNDFVVNKWQEAGSRGPDQFGAQLMGRWQSGCPIQLQDQRDDKSLALRNDFDYGGVTQPGVCPLAAHIRKAHIRNHFNPSRIMRRGIPYGQDFKNGGADEGRGLLFAAYQSTIENGYRFIQTAWANQPGF…
g166.t1	MFRSGLVPALCTYLTSLFPYAGYEWNRSSPLRSSPNTSSSMYPDRPIRPLPARSLRARLSPEQADSIVFPTNPPSTGPLFNFPYTSSERGNRALRTGENDHHACHCGHTHSEVESEEDEDERGAPLPSSPSYHYSRSAPGRTAIAASGYHKPGSASSSVDGYESFENTNNKKKRKIPNMGSNSSHHTTLSADVASMSIAHAHENGEVDDGTARYGPAPSTPQHNNSGTGIAGAGRGRFGRSGSGRSERRVLGNSTNLANAKASKRPSEQSGIISTAIANAQATPPPQGNENVSLLQQEAAKNSATKTQFTFTCGSDSANKMVWPGQENGPYPQPPGAYPTTTAPPPPQPQTARARPPVRPDAHVVSTQGTQTSPNMNGVHPPSNRGAPPPKAGQAPQQA…
g167.t1	MVANETLHKYGSDDGWHGVIEEGAEFPPEKDRYHLYIGLFCPFAHRANLVRHIKRLDSFLPISIVKPYPKGEPGWRFDETYPNATPDHIFNSRFMHQLYFRDDPSYTGKYSVPLLWDKKTNRIVNNESIEMLKWLPHAFDSLIKDDKIKGIDFYPQELQGKIDEITPWLTSLICIGVYKAGFNPTQEGYNEHVVSLFAALNKLEKLVHSNGGPYVLGGKLTELDILTYPTVVRFDTVYVQHFKTNLGTIRHDYPVLNNWLKNLYHNVEGFKESTDFQHIKENYTKSHKDINPLSITPMGPYPEVEEGYESDWSKLKPGEVKHPLVVEAGSKL
g168.t1	MASSKTALTMVRSLALVGAIIVFAFGIWSLVIIRDIDNRGENVLDSFQTRLVGDATSWSQFIAAAAHGVARTWILVVASSITTLAILLVTMSNRHYWLRIPSAIVVFVEFTATISSIAISSCSLSVALSIRAFSTPPYVTLDSADLAFFALLDPLSRTLAITSALTSAFLIITCTGGLISLHKRHRQKKDVRSFEPTISALGMNRGFYAVYPPPNPTHDAIPTMYDPYRAFRKEPRGPPNAKQVAFTSEGAWMSRKHSRWSASTTSPSGTEGDTMRLLELKRARRAVPVRPERPWSKSWSGREGTHAVL
g169.t1	MSLCVACNKPLVVEIEADDEEQCEMAGSSSGKAPAAAPETVPDDVQLSCECHFHWDCLLEAYHVTECPSCGKNIASVSLSGEQQVLCNLNNEGGLQENLDLLPLLTEESYLKAYPEDRKCRAFLEFCREGDYKAIIDMLQDDEVDEVDEDEDEEMGDDDQPDKEVGIDRLLRYQDPIGEMQSGLHAAVQAQSREVAWLLLLLASNLDLMQFPPEVFQEAAAMGIMRGLTEDKVDIRSLKDANGKFAEDYANEIGGVWNGWTGNGRLSI
g170.t1	MAGGSKRGGFRGAGTGGYKRGYTKKRSPNDEDEAPRASKKSKGDEDEEEDTAPLVPKLQIDDDNNPFVAINNSSKRRVTVSDFKGTTLISIREYWTNEGGELKPGKKGISLSVEQYNALLAAAPILESVLRKKDIEVARPDYEAKLDATAPVEEAKEGQQTTAKADDDDNDHEGDDKEE
g171.t1	MGSTLKVFHALSILSLVTPGINAAPAGAKLELKAFKNVENKIYKRQDAGGLLDTCSYCPVIRRLSSYLPEEVQEQADNLNNQLRDLIAAVGPQLPGGIPALDSLLNPQQGGLPTDILGGGLSGLGGLPIVGGLTSALPTNILGDLPVPTDILGGILPGAGQGGLPTDILGGLATGLPTDILGGLATGLPTDVLGGLVPTDVLGGLLPTDILGGLATGLPTGLPTDILGGLVPTDILDGLATGLPTGLPTDILGGLVPTDVLGGLVPTDILGGLATGLPTGLPTDILGDLVPTDVLGGLVPTNVLGDLATGLPTDILGGLATGLPTDILGGLVPTDVLGGLATGLPTGLPTDILGDLVPTDVLGGLVPTNVLGDLATGLPTDILGGLATGLPTDILGDLV…
g172.t1	MSTATANKPPATGTPARSTPSRVSPSSPAAANRTPARSSTPTTNGTATGVNRTRSVRSGANGAPVSARAAVKKPAPPSALRRNSSQVDSPTEEDSAAADEQAAFLQNLKERLLKAETEAEERQKQIEVLNARLDDAHAEQSKLEERAHEEEEKVESLENEKREITRQHRELEGIYEAERAQAMKEKESTQTREEELQQTIQRLKETMATKNVQGVDDGEAPLSRASSFRNNPSRTNSSQNLENFAPPNSVQRSNSRNNSKLIHQKDKIIEDLRLELAEYQVKMLEVENAGGGRTRELEKQLLETRMTNARLMEDNESFQLLLGEKTLNGDLSRGDFLRESSHTEDRAPSRNGPSTSLADELESAEEAPDVELVRKLEAEVNSMKDQNKALTLYINKIIG…
g173.t1	MSRVSTPSLPTFHASNGGSTSSRPGSPRLQPPAEHKRSGTPSPKQSITASYSILSRQETAQRLQTSETHGLASSDASARIHAHGRNELPHEEPEPLWLRFVKQFKETLILLLLGSAAVSLMLGNLEDAISITAAVTIVVTVGFVQEYRSEKSLEALNSLVPHSAHIVRAGQEHSRATGTATEEIELDHLKDTTAALAAAKRKSTTISATLLVPGDLVLFHTGDRIPADIRITHAADLSIDESNLTGENEPVGKTPDTITPPSGTQRAPSPFYASEGAGTVGADIRLNDQKNIAFMGTLVRSGYGQGIVIGTGGNTEFGAISASLQEIESPRTPLQLSMDQLGKDLSYMSFVVIAFIGLVGLWRGWKFLEVFQIGVSLAVAAIPEGLPIIVTVTLALGVL…
g174.t1	MFLPEDLLFKSGQLARVWLAANQHKKLTKAQVLQDKIDEDIQVIIRPEGAAGGPLALRLNGQLLLGVVRIYHRKAHYLHDDCNDALWKIKMAFRPGNIDLPAQTHVANPTSLTLPDMITDLDLLAPMPDPALLLSQTLDGDLAFGNTTLSDWDASQFLSHSVEQPRQPEMELDDEDQLRLDIGEDFEPLHLPFDEGTSIEVARRESLQRPREEEFGTELKDLRDDMEFQVDTGEDMTDLAHGTELNLGLDTEMGGMAGTELPLPLPSSVAGDDVPQLTREDSPLSELGEEEATRLAQEVAEQDPTVFEPEQEEESIHQARAKRRKVITQDAETMISTAQLRDQQTNRDKILKQASFLPRDPLLMALLNMQRSGGFVSSILGDGRSQGWAPELRGILSLE…
g175.t1	MLTRHPRIPNVKSAQFSLYPFRTRALVQLAASGFRRTLATTLNTPPTPRFTDSPAPKTSSVLYARTVTNMDTNILAVDPQRLGGITFTESTTDLIEEWHIDYAEGKDYQSLKRAAEEITNTDTPVAFPTETVYGLGADATRSSAVKAIFAAKGRPSDNPLIVHIHSLPQLRELLSDNGASQTEVDPIPAIYRPLIERFWPGPLTIILPVPEKTVLAPEVTAGLTTFGARMPRSILALSLLRLCGRPLAGPSANASTRPSPTAAEHVFDDLQGRIRTIVDGGPCEVGVESTVVDGLSSPPSILRPGGVTVEQLRQCPGWENVTIAYKDKQEGGASKPRAPGMKYRHYSPKAEVILFEAGAARPGTEEVTRKSKVGIIRTKSWKPALGLTAQDTSVRDANG…
g176.t1	MHFPSTLAFLSSALALALPTSAHGSLTGPSISPSLSTATTTTTDPYMNTETRTARSAKKTKTAFATVTRIMATSAYVTTSATASHLADPPCTKGECEEEGNGNGRTSATVEMGTEIHADTDLDASAAPTTTATTTTTRPSSSRAISRLTRAANSTGRLGAMGIVSVNNAAMGTLDTAVTGGVPGGSFKPTAPDRESSAWDAERTSLLSTTPPATATAAAAAAAAGGTTTSRSASHAAGGDGDGWGLGGFEWPGFGAAETTPSTSAATSIAPASAATLTTHPGDGIAWSGTDNAIRLQLHDRALLGPGGMGKGELRRGLRRHGGNGGDVRQRECRVCGTEGKVLCRGDVAVGVCEEGCLVMKMLGKGRGNGCEDE
g177.t1	MENIADRPTSELDHIPTAWLLTGLVVFPFVIYQLLGFLSPLIHNLTAMRISEIYVYPIKSLRAVPLNEAVATQYGFEHDRQSGYRSSPDTEKLEHFGVDLLSSATDAFNMGEKYSRWFSECLGYEAVFLYVGDNKRAVIFQDMQPLTPDPLTAFFKKNIPFLGRYVEQLMGIRQTEPWRIKFHDCAPFLITSKTSLDDVSARLEGEKMDMTKFRPNIVIEGANEPWQEDYWGKIKINQKTEMIMAHNCIRCQSVNVDYNTGKPGLGPSGQVLKRLAKDRRIDQGAKWSSVFGRYTFWAPNAPKSQTIKVGDKVHVTKVNEGTTIWSWPGLGSIPKPS
g178.t1	MPKDSRVSASFNTTCAVSAALYWLLCACIPSTNSLRHLVTLVERSQARAEAKILTTCHQTTATVQLSKQDHALKNARPTSSAQATQSLSLVLLTWKPASSVAHRAHPPLCACSPRLPYKATLQGYRLRAQNPPTMANTQIRRKDTTKGPPLRILSLDGGGVRGYSMLIILQELMHRTFVESEGRAPKRHEIPKPCEHFDLIAGTGTGGLIAIMLGRLRMDVETCKDVYVRMTRKVFETDKTFAGIPYRSTLFKASKLEEAIMECVREHTIYDDEGNDNHDGLASSADLGAPMTPGSALHQGRIHRSASNASRYSQIGMAPVNMRVAAMKWGNPHALLYDNREERTKTAVTAVYKGTKKAGTGQIWLRSYDSRKVGNEWPGREIGVFLSIGTGKRPDGTS…
g179.t1	MAVRFIPADQIDETFKSKYTDLISAPLGSKIVSFSDEWFAAASNLTTKTAPISRPGVFVHSGAWYDGWETRRHNSAPFDWVVIRLGTASGRVAGVEVDTAFFNGNHAPEIAVEATFADSDEDVKTEAYAAWEPVLAKQECGPSQRHGWLLPAVTDKAYTHVRLLMYPDGGIARFRLYGHAVPVFPAAASAVFELSATVSGGVATSCSDQHFGTKDNLLLPGRGHDMGDGWETKRTRGDHVDWVIVRLGCSGQIDHLVVDTAHFRGNFPQRVQVFAGRFDADPAHDDGAWVEVLAPQKERAGCRDGVPCRAGQCPGPDVFARQAGDYPPTAG
g180.t1	MDITDREHGFQDDPPPARQLPADLPTSLNDRRPVSAYLPEETEMYDAWQGQSFLTTPMPARPLSFNLSLDDPSFGDEDMQQLEDSDSRLVQMLAHQARLKNDNAGDEAKVVADDKLSHQEKREALQGLFTLATSNGELERVKRLLQGKAREYIDTDAVDAEGTPPLVYASCFGHDDVAAILIQEGAKVDIQDKNRWTPLMWAMTNRHKGIVKLLLDHGASTDVKSSGGRTAFDFVEPNSEISDYLHESGYAIGNAGVDDFYNAGLENDRFEQEMQENDMKRRMMMESAFNLEVDIGNLGLDEQPESPEEPEEGQDFIWDRCLNDQMFVFQESELERILDIIITNMTPQRSPSQKPVPANILFLAARYAHYHASADLLETLLVSAMGKINQVVDKYQWDM…
g181.t1	MPMSEAPHMSPETRFSAIFARLSELPNYVWDSDIEPFHSSYDNWHFFGHQTASYANERPPSRGRSAIASSPASHSPDAHRPSVVLRHRSSGSDASSTTAKTHATATSVHKEGRPVVCRVSNHTLRLEREYQLSKLVVTKSDPACRHFVRPIEFIRLPTKPGEEPLVASIFEAPGQNYLKDLVTFGPNWYNLTNHDKTSEPTSHQPSTGVPLLTFLDFAVGATECLEILHHGHEMVHGELRGDAFHFAENGHVKMINFGSGARSFENGLTSAGWNTLSREVGIELKLAFIAPEQTGRMPAEPDSRTDIYSLGILFYTMLCGSTPFDGTTALDVMQNVLSKRIPPASSGRIDIPEALSLVIQRMTQRNIEERYHSTSGLKFDLTRIRELLSEGDGEGLKAF…
g182.t1	MSTSTPKPSTGSGWTDRERLAYLLSLLEHSGAKPNIKTAPLPSGRSVIACERMLSRLKAALKGELDALRDGAAMRGCTNGDATNATTARDSEGSGSQASKATRGAAARKRKGGDGAAAAAYADADADADADVEVDGGVKKRSRNAKAGAKARARAKDSTIEGRGEVEWEGGVKKEEDEAEAEEVDTKEEEV
g183.t1	MASAETNKPKSWSDRELLVYILSVIEHSKVTINYANAPAPAGRNSSGCAQKMGKLKKALRKEIDAVKNGGLAGDAKAKGKRKADFEEGEVEEKARKRGRARKIAEAESEEVAEVSEEEVEV
g184.t1	MTQSTSNTQRPVATRQLTTTSGDFCQSNSPDVRKHLGTYGLTPPAVESYDVQAQRCLRLLAMKATPLEKFQYLTHLKASNVHLFYRLLSQNIKELTPLIYTPTVGEACVRWHEIWTQPEGMYLSFSDRGNLRQILDNWPHDVDITVLTDGSRILGLGDLGVNGMGIPVGKLSLYTACAGIRPEATLPLTLDLGTNNKALREDPLYMGSRLPKVTAEEEKEFLDELMAALTDKWPNIVIQFEDFKNPFPALERYQNTYSMFNDDVQGTGAVIVGGFINAVKASGVPVKDHKAIFLGAGSAGVGVAKQIVEFFKKEGLTEEEARRKFWFVDSNGLVTHDRGDKLAEHKVYFARDDNNGRQYQSLARLIDYVQPTILMGLSTIGGAFNKEILQKMAKLNNHP…
g185.t1	MSSCFGFRGRSDDQQPLLPQYRDDTTLQRELHQKLHSYQMIRALGKGFMPSNEQLIINLRTLLAADILNPDNPELSDSGRLLVKFTKQWLHQFIDLLLHKNSEDQIQDFLWYLSKARVEVDVADIARSATRSKAKADTFAAYQSLQTVGSLLLTNSDFRIFLSDLNTVGREVFKDTAFTISDVAKEVGKKVEPSEAEQKALKEPGADAGNGKAVSSEELNGEVTEVAKAVGSGVVEVAQETGNSIVDKLQGAEGDSLSYRLKKTVTNLRQKRDYSDSVSTLSLLLQRYARTYSRMAEEAVGTVQNDVDTNREMDKAVKNFWLLMSSFGDRNEWKELETRFHKLLEHSKRDPAFEDLLMDIGNSLQKLLTDPDFFDHVDEKFQELRKKSSSVGNESSLRK…
g186.t1	MAVAVDSDIDNSYEIKDLQHSLRSANLELSLARSKHSVEAVVKDEDIRKLRVRQCLLEGDNSDLHEQLEEEQARADELEHALDDALLNLDEQKAEGEAAQNQIRTQSREIANLKAELKAMENVTSDSNKILSEKLALSREISSLRPEVEHLRAQVESNQGLLSEKLSLQRQFTTLQVELENEKRTSARTISKQGKKMEQDDDLRNELEEVRNELATEKKDRIKAEAAVAKAEKAVEKVQADLESQQRATEKLEAKLEKLAKKDTKASKRDDANDAALQELRQELDHEKALRIKAEKALKNASSESAEVERLREELELEKKARHKEEKAAKKNSQQTGQTGNAQEELEEEKRERKKQEKEYTKTLAELQGRNTVLDEKLSAFREKLRTTKEKLKEKEAQL…
g187.t1	MRWFQVLTASLLPFTALAAKKTGDKYTDARAKSLEIGRPLKLDDGGYASLTKGQRDFSVAVLLTALETRFACVLCREFQPEWDLLGKTWIKGDKEGKTRTLFGTLDFIDGKNTFQSLQLKTAPVLLFFPPTVGPNAKVDAQPVRYDFTSGSQSAEQIHAWVSRHLPADVPKPKISRPINWVKIISVTTAVLGGITVIAIASPYILPLLQNRNLWAAFSLITVLLFTSGHMFNHIRKTPYVQGNGKGGISYFAGGFSNQFGLESQIVAAIYGVLAFATISLAIKVPRIADSRTQQFAVFLWSGVLLCMYSFLLSVFRQKNGGYQFWLPPF
g188.t1	MLYLVGLGLADERDITVRGLEIVKKAERVYLEAYTAVLLVDKEVLESFYGREVIIADREMVESSSDDILADADKVDVAFLVVGDPFGATTHTDLVLRARELSIPTRSVPNASILTSIGTTGLQLYNFGQTVSMVFFLDNWKPASFYDRIAENVTIGLHTLVLLDIKVKEQSLENMARGRKIYEPPRYMTVAQCAQQMLEIEEDVKKEGVYSRESLAVGVARVGAADEKIVAGTLEQLTEADLGAPLHSLVLLGRRTHDLERDFLLEFAVDKEKFKSVWARDYEGKQ
g189.t1	MMFVSGETGEPSPETTTLIESIVQDQVQHMLRECTSLATRRGSKSISTDDLFMLIRHDRAKISRLRHFLQWKDVRRSVKDSDDKGGDAGADVGTGDADLAAGVMGGGTSGPGPEAGKKAKRAKVDLVWDVHSFFTEFPPLKDDVEDEEEEEMNFATLQRLKNADERTKNMTREEYVHWSDCRQASFTYRKGKRFKEWAGFGLITDSKPSDDIIDILGFLTFEIVQTLTEEALKVKDAEDAFKKSSGGEQNRLKRKRERGLFDPPEEAREPVQPAHVQEGYRRLQRGNNKSRAMLNFTRNVHRAALKLI
g190.t1	MSETLQTPAERRYLRPSLRSVTMIQPKTGERVKRSFTLRRSSHRNTESTEFLLAPGQFDPARHADLGRMERLWEDFKSRMWQAIAYATSPTGVGILKCSLAYILGSLATFVPQIAGLLGKNDGKHMVATITVYFHPARSAGSMIEAVILAFAAFTYAAFVSFSSMAVSAWFGYQHHLIIGHVIVLIVFCGAGLGLVGWTKHKLGSPLVNVACSLTSLALITVLTKEGAVQNATFSYVKIWQVLKMIIMGCTASAAVALLVRPTSARTEYRNTFIQSTDAMAENLNAIARSFLSGAEQDLRNESFVKTSNKSQSTYKTLVKNLGEAKFEHYVLGTEQEYKISARLVKCLEKLIQSIGGLRSAAETQFTLLAQSNTNVGTPSDGVHANGTVASSIFSEHTL…
g191.t1	MEDFGENDEMAAMMGFSSFGAKKRKFDQANSPKAQDGYSASGANSTELGVRTKASSDEQQGSEDPLGAVSSVQQTPKPPAPASGLASFLARGQALPEKPTKPTRFPREAPTEADPSASETVSFGGPSISRGELNTLKFGIKNESGDAAYFLPSFVEDPWERLLSNR
g192.t1	MSTTHAYYPSYPSTSYPINVPQKPGYYYPPQQHFGRISASPPEAPDSTTTSGVPSYEVSASSSHYAGSHSDYDSSSGAASVDLLDYMGNRLNGSFDPLPLDRSLAKQAQTSGELNAKHRELLELQALAQRRLAGAQASFSSGMRAAKEVQKDLQWTQKRVDSLNNRAAQKYPDQYRTAQRRYPAPVDY
g193.t1	MFNRDRLPGLPGSSPRPPPRNDGYGQPPQQQPRQPPPQPGYDSRMGGYDDRQQQGYGAPQQRMPARAPPGGSGSARQLRPIKSPGGNAYAFGNLVAVSPQDYPPTPDGSDIYILLNGNYVLSARPTQGCQPGEIGLTDAQRTWAGITLGPQDMVTVQPYDAFSQAGGQSYLGGVEVEVGFAARKTTDVPYDQDELATQFKKNFENQLLAPGQQLLLDVKNIPLRMSIRTVQLVDLSMEKSDTSAPPLTDPRARGILTAHTQVDFFKDARTDIKLKASNRRPAANSIIQPGFKFEDMGIGGLDTEFSAIFRRAFASRIFPPGLVEKLGIQHVRGILLYGPPGTGKTLIARQIGKMLNAREPKVINGPEVLNKYVGQSEENIRKLFADAEKEYKEKGDESG…
g194.t1	MSSGNTFEDLSGISTSSFSNPYQALIAACEDDPAQIQKKYAFHRAARNSQQKAKMLDASFPGVSIDPILLRLSDPTIEPGYVDPRHCLVFWVRPTQKIKDLINRVQQELLTVAPNLWLMPRDCQHITALEVTHSKTAEEIQKLVNQMRDKVPAITDYTSRHRVRLIKPTIGYDASALALSFVPAAGEGLHSGRSSKDDQFTYHHLRRDLYDLCKDTGVVVDSRYVVPSSHLTIGRFISTKDLADEMGSPDPKKMETFITKIEEINRWLEEEFWPEHNDGKIPEGGEFNLGEETGLDYRMGTLWYGGGESVHRGEGF
g195.t1	MCEPCIKWDKQCGAPTKRRLNTNTRSFLGLSTPEYDRPTPTQELVRGNGRRRSTNQASRRASTPAPQTTTLPSRSRATARKSTAATSHSYESEILNEPTAPYSDTSSSVGQQPGRNGPKGETRTNNRLSQVQSKRSAPGINSVTPEHAAALLNSTLIRSSSRTSTRNNIVASRAIVQEATPDDSAEEEAEHTAIDYDMVKVESAGSQLITEINNAARPSPSPAIETEIEDIHMVYAPAPVTEILAAGPTSSPRRHAQVIIPQTTRPRRSRGRPSYVDLISSDGSDQESEDNGKHDNEDYDEDDDDVWDPLDADDESDVDEEVESNATIESSGDESGDDEDLDAVIIDPEPSSALRRRALLGSSRSQYSSAPKLGKGIDLNLPPLSNIHDISVDMASKAR…
g196.t1	MATDAKPHQATVEDYFSDDGRGNGVRIEAFTPDPSPGKANVRTKRSNPEELGLDKTPTGRVPSNSDVKSDSGYSSQSVAGMSSADSAASAMSSQRSQPVVPAPAAPAAPAVPAAPSPTPAQRAPRPPQPRQQSTQSIPSAQPAARQPLSRRDSQASRRPPTADRRPTITQPTPKRRDSRNLDDCTVPGCTKCGPDAIEARPRQPRRPSMLHTQPAESAPDVSYPHPYDTRSQLSDPAQYQNASSRENRAPRTYHAQGGPVVQPAISRRLSVNARRPTSYHGDIPYNWPQPGMHASHPSPPQEHGPPLSRSAVYGNMPYGQPPMPSPHMQPYPNPNPNPPPQAFYQAQQMQPVYDQQRPPLQARASASSGYGYPTTPVLQVERTDRHMPSARYHTNPPPP…
g197.t1	MLNVQIQVSSALRAMLVTGIILAPAVMATPAVQDLVDLRVVINAAANTIGDLNNPNRGWGLFGDSSQMGTANLINNVTSTILQSKFQIDTNKTAWLDSMNVTNATDPSVNTTLPSAWTPTLPLSSSMALPSTLPTSTPTLENTTTDLSTPYTDYVSSIPNLSTSLTSLGRAWHREMNSPVSEAIGVLQESITTLQTTMLQNELIDSSAILRTIRASGSLESAQQAWSRFLNLPGRAGGSDLSEDDTLAPGKRSVQRLAPANGKQYTHKELWGRKELSKIGEPNQDDAIVEWEAKAEDLKRGTAQPFSA
g198.t1	MSSMAVEAKSLSSLTALASNPPAYPRNPTHVKHEPLILYIARVPGSKDVFLSPMKPREKVVTAEDIQSSLYFVHVEHPQDVNLIGLPDYEYSNSSETRPNAANRLSTPVIQRKAVANTPTAAPSRKPVPGTLTPIPNFESRQNVSAGHYAQRPGMLTPGYEPRRSYDSSRSETENDTSTFQPRPDVNTCPTGISLTLIRRDPASGAQWNVARIDDPTITEVSSAGLAESATRRKPGAPLYIAISNPGYSKFLHSDYEQRPSLPARASDLSIRSHQTSNAPPRSSMDHHLETSSKDDNVFRRRLWMEGLQHGGGFGHRKNGSHDYNSSRPTSRSNYDDRSSADQPLPSPSFLTREDQAYGTLQVSERQSSFRGYVFTSPWNGRCEFITGASGGSLKCRHI…
g199.t1	MPDDLESRLKSHARAFEGLMSLIPAKEYYGKDESITSTQWQKKKKQTTEERQAAKRAKLDPASHKTAQDVLDENARKRKRELEGEAEDDAVSEAPSSDLDMDIVKETPLEGIKKAKKQKTKKDAEAEPAEVVREGRTLTKAEIKAEKKKEKKKEKQTQKKNKEEARKASQAEFKEGLTAPKETKKPKEVDVDEEEDDESDGLEDSEDRVEALDVSGLVDAEEGQSTAPTSTANSNTSTAASDASSSTSPEEAPSKNAKKEKKPLQIDEKSQEEFRTRLNAKLEAMRAARKADGPDGRPAKNRAELIEARRKKEAARQAAKKAGRQEAKEDEARQKAEEQLARIRGGSGSPSIFPARSPEHERSFNFGKVAWEDGQELEGGLSKFLESRKKKGKSDTKTA…
g200.t1	MASTKPLTMLARGPSATALLRHSQFSPRFASPATVALFSTTFARAATPAGPPPPGFRLPPQKKWDEGESALDKAGKYFLLMEMFRGMYVSLEQFFRPPFTIYYPFEKGPVSPRFRGEHALRRYPTGEERCIACKLCEAICPAQAITIEAEERMDGSRRTTRYDIDMTKCIYCGLCQESCPVDAIVEGPNTEYATETREELLYNKEKLLANGDKWEPEIAAAARADAPYR
g201.t1	MFRTALLRSARSAVRAAPRCQASIARPARAFVQPKQITPAAYFQAVRSYASSAGLSQEEVVGRIMDLLKNFDKVQDASKLNGESHFHNDLGLDSLDTVEVVMAIEEEFSIEIPDKQADAIHSVKQAVEYILAQPDAH
g202.t1	MASTSGVVRRRGAGAATGSAEDEGARVASPAPRNDRDRAPETSYEDSENGHKIAFDPRDISENAERSKQPKLTLMEEIILMGLKDKQGYLSFWNDNISYALRGCIVIELAFRGRISMQKDSSRRRFPLADRVIEVIDDTLTGEVLLDEALKMMKSSEKMSVNSWIDLMSGETWNLMKIGYQLKQVRERLCKGLVDKGILRTEKKNFLLFDMATHPVAEGAAKDEIRRRVRNLLTNRTVVLPGSQFLPEELEFRTLRTVAMVCAAYAANVLENALTTLGHEARERAFAQVDELLAEYSQWPFARRAGGGQGVGANLGQLINDEINSGKDKELQIEVVAACLSVFTRLDSLL
g203.t1	MPSPTGADAHAHTHAHAPTPQDSSHSQNGASLQNGAVQQPTNASSAASSFDAPGDNNAIRDGKQKAKAVLAASGLNMESPTADAANGASRKRSHSGSRKPSAAAHELTDGQKTRQTALLNRYIARDLLDSVNKYERSKYSEQVYGELNDLRDFYREEVFPVRRQHPGAIFGYGYGGYGNGITDTQTNPRDPRSQLPQLLYPNQAKRAGRRAAPQLKVDREKGTQQAEQVEELVPVRLDIELDRLKLRDTFTWNLHDRVTDPLLVARTLVEDFQIPPELHQSVIHQVDREIREQIQDYYPHAFFDDEPLDPQQSYSAYKNDEMRILIKLNITIGQHTLVDQFEWEINNVLNSPEAFARQMAADLSLSGEFITAIAHSIREQCQMFTKSLYITGHPFDGRP…
g204.t1	MAEAQVVDYTLANPDTLTKYKVAADISQKVLKEVSGWISEGASIVELCERGDKLLEEEVGKVYRGKKIPKGVGHCTTISPSSYVTPYTPLKSDAEESGATLKAGEVVKIQLGAQIDGFAAIVCDNVVVGASGEITGAEADLLLGTYYANELLLRLMVPPGLVAHGDEEEQKKNAARKPYTQGQMTQMLEKVAKAYGCNVVESTTIWQFEHNEIESKKKIILSPGEGVRGEGLPEVGEVWGVEVGLSLGSGKIKNNGQRTTLHRRTANTFGLKRPTSRQLLSEVVKRFGTFPFSLRQIEDEKVAKVGVVECVRGGVLRQYEVVVEKDSKPVARLFSTVAVTKNGLQRLAQPPALDLEKVKSDKKIEDEEILKILEQPIGKTSIKKNKKKKKKPAKKAAAG…
g205.t1	MPLRKSARGPRSSTTPYASPTGTPSDSAKEKHQRSIIEWTEPAIQNPTPSFEEHGFARHGVLEQMGALGMPPSSKVKQRTRAMGGDTAARKSLAGKGNICSDEVGSTPEVTPAPELEPDDSERQEEEELPLELLPQDEDEDDDYVPSKTKKKMPASKTPVRGKTPVQGKTPVQAGTPVKADTPKAASTPTSPAVQTVEKPRDSETTQRAKIALLAAAESAHRNRKPRLGEALKQLMRMSSSDPSIAYVVDAVVHQHQTTEQWSTFRENIKALKKSVKCEAKKKRKHDQRNGSLVDSPRISQQPSPRPSSEVAPNDSVSFDHDNEEGTHVMRSTDCTMEDAYPAAASTAQALPSPHPLSTAPALSAVEPSVETAPQMPSKSPRKKHVSNDYLAPGSEMDV…
g206.t1	MTPNTIISRDSNAIDTLTHSTYPIAATMADATYYIDEDVGHDSPEQTGDESLPYKSLGYAIYQKGEAAKFKTRKSVTGELAAGADPSSRMEWKDAAKSALKKAVNYAKTLKKKAEKEGEQLALRAKEQAARNEVLEEAKKVVLDEDRSLPAPIKIKLDDTDASKITLGDGKDVKGTRVRVFGRVHRERKQSKVLFITLRDGYGYMQVVLTGKLAETYDALTLTRETSMEILGELRQVPAGAHAPNDRELHADFYRVPSIWKAAGGDDAITNRVSKDTEHATLLDLRHLTLRGETASKVMIVRDAVEFAFNQVYKELRLRKVSPPALVQTQVEGGATLFKFGYYNEEAYLTQSSQLYLETCLPSMGDVYCIEKSFRAEKSLTRRHLAEYTHIEAELDYIN…
g207.t1	MADPTLYTFPSPLEGYQNLEPLPQHKAADGKSYVNPPAEKKSEAYTSFVSPITNSKRGGFEYGYHSMSKAEELKFATELWERIRREFPELRIYQIWDRPLGPHPMGMFEVNIFTPEQFGAFIPWLVINRGPLSALVHPNTDQEERDHTQRATWMGQPLPLNLRLFKKMSKA
g208.t1	MGREHLTNDEFFTQLGNLFEHNRKKGHGSVYLTQKRLTVDSTSTPPTPTKVADDPLWDTHPENPLPVLVRASNNRSDKKAGTDRQDVAKIVLSTIVKPDDIDTFYIRYAEACKTGMSSLKKRDRKKGKKDKKKKKGAETK
g209.t1	MRQQYGGPKLPADLRNQFGDPANRGKSSGGRNGQVNRKDRRKAERDQKKSQKTRLKKAPPSSASHVQNGKRQQAVQEEESEVDWEDSEDEPTSVKKEAAPKSILKRKVQPDKDDSPVPAKVSRAVQDRLDQDDKEIRALEKKLGKKKKSAGGGGDDGLDDLFGDLGDFSDEDTLENPNAKRKRTEDDDWLASKRRKALGTAAPSAPEPDSEDEEDDLENPFSEDDDLDSEDMDGEDDEDLEEGDLDDGMDDEEDDEEDDIENPFSEDELSDDEEPAPRVRENPYVAPVAANAAPTTKYVPPALRGPPSSDAEALSRLKRQVQGLINRLSEANILTILKDIEKIYANNPRGYVNTTLINLLIDMLSDPSALLESFIILHAGFIAAVYKVIGPDFGAQIVE…
g210.t1	MFRSLAPRAVQRATRPVSNSTFCASNIYFQNRLRRGYASEAEEKDLVIIGGGVAGYVAAIKAGQAGLKVACVEKRGSLGGTCLNVGCIPSKSLLNNSHLYHQILHDTKGRGIEVGDVKLNLPAMMKAKDTSVASLTKGIEFLFKKNNVEYIKGTGAFQDEHTVAVNLVEGGETTVRGKNILIATGSEATPFPGLTIDEQRVITSTGAIALQEVPKKMVVIGGGIIGLEMASVWSRLGSDVTVVEFLGQIGGPGMDQEIAKSTQKILKKQGLNFKLNTKVIAGEVSEQGIKVNVEAAKGGKAESLDADVVLVAIGRRPYTAGLGLDNISLETDDRGRLIIDQEYRTKIQHIRAIGDCTFGPMLAHKAEEEAVAAIEYITKGHGHVNYGAIPSVMYTHPEV…
g211.t1	MSTAELDQRCNGLRNDLKAWEKQFAAQHNGKRAGREDIKADAVISQKYKEYNRLRTQPPTKAAPQTPSKRTASRKHISEVERTPIAPPRAPVLTPLKRKREEEIAEEEADAASERLSPQGPAFIGPTPQRDGIVLGLFDNLAAETPSKRRIIFGEIEPNIFQTPTKNLEVASEASLESRARGDRTPLSVSKRNLFNQFITPKKRKLDEEGTPSSALKGLATPAFLRRDNALDRIEEADETTPRPAPWKRRVLGRSLSAMIQAMRKDEDDRLDEEADIMRELEMEEEGIPAPARQRASQMLVEDSQVAMPLGPDRGLESGEDEEDEEELGRDGKPRKPWKKKGLKRQTRRVIMRPNAVKPKPVPQFQHDDRDSDAEPTSVPETQAQANDDPAISEEDNSD…
g212.t1	MADKELQSALQQLHQTLKSRNYQQATTLLSKAKMALLQLNALIPQENTTKKQLQAARETLELGAIISIRLKDTVSFTRYFQQLQPFYALPASTLPKDGSQASKVTGLYLLLLLSEGDYAGFHTLLETLEVAAAQEGKGLEDDQFIQYPIRLEQALMEGSYDRVWGDTKSERVPSEEFGMFSEILIGTIRKEIASCSERAYPSIPISDAKSLLFLDSEGSVVNFARESGWVVKDGRIYFPQQEDDYQSKDILVTSDQVIENTLGYARELEMIV
g213.t1	MKPEALDAFATQSIRPGTLEAAAASPGETGRSMTEASVTQQEKVHLPEQRRPPLNRLNTPLGQRIDGTEAAAKVVEEAAQVVEGVVQGVKAAIHEAVLWAEKKAEVLAHSEDHAGPYDSPATCAGGVSDLDVMATGVLPATIPVQEDGKDRELDGGHKSGGRDSRL
g214.t1	MASSNHPLLLAATVAHGLLALGHMSKGLEQFKHASINALPTTLRGAVKAGWYEGGGFLLIMAILNYKWAQTGLLDVYDKSIAGLLVAILAGAAASYFQSGDKPTATALSVVAILQGLGAKGASP
g215.t1	MASAAPIQNRPYRSHKVPACTRCRSRKIRCHIDIPGEPCLSCRERRLKCQYVESSTSSPTEENGDRKPAKRRRVSNAEMAEGPMRPQSAPVLHKATTNPSASIIMASHLAEDLDIFNRHLAKHRKPGGEASETSNYQTLNHDAEDPIVYLTVPRFRTGLPPGSGCGRSQLEILEQIMGPFKREVIELYFKNLHYHFPVLDEEMCALLRNGQLGKVPNNLLCVIYATGSPLWPRSETLKMHPKPDAHFVWNKAISATLEDFLSPGMSTISTAILDQIGRPSVSIVGNITLCGKTVSLAQTFGLHRDPSQWRITENERSVRIRLWWCVLITDTWASVAYGAPPHITKGYYDVPRPTVSSLVSHKATQQQKQATVCFVHFCALTELVGLILPLIYQIEPDRM…
g216.t1	MTIPDEVDIIVCGGGSCGCVVAGRLANLDHNLQVLLIEAGESNLNNPWVFRPGIYPRNMKLDSKTASFYYSRPSEWLDGRRAVVPCAHILGGGSSINFMMYTRASASDYDDFQAKGWTTKELIPLMKKHETYQRSCGNRDLHGFEGPIKVSFGNYTYPIKDDFLRATESQGIPFTDDLQDLTTAHGAEHWLKWINRDTGRRSDSAHGYIHSTRAVHQNLHLMTNNKVEKVVLEGDRAVGVKVVPTKPLSPGQLTSRVIKARKQIIVSGGTLSSPLILQRSGIGDPEKLRKAGVKPLVDLPGVGLNFQDHYLTFSAFRAKPGVESFDDFVRGDPAVQKQVFDQWNLNGTGPLATNGIEAGVKIRPTEEELTMMDKWPCPEFRSGWDSYFKDKPDKPVMHY…
g217.t1	MITTRLAIRGSVASRRATAQLLKSLNTSSVRPAFMVVQHIQAPAYQRQFSSSESPKIQKFFEKKETEMVRRTPAAWPHPEFSENQMDGVQIAHREPQTASDKAALLATRVLRWGLDKATGYKHKEGAMTEEKYMIRNVFLESVAGVPGMVAGMLRHLNSMRRMKRDNGWIETLLEESYNERMHLLTFLKLSKPGPFMRLMVLGAQGVWCNALFFAYLISPRTVHRFVGYLEEEAVFTYTRQLQDLDAGRLPKWEKLMAPDIAIDYWKMPEGHRTMRDLLLYIRADESKHREVNHTLGNLNQKEDPNPYASEYKDLSKPHPSKDLAHQKPTGWERHEVI
g218.t1	MSDKRISFKVDGEVQGVNFRSFTQKQAKSIGVTGFVSNASDGTVQGEAQGSEDKIKEFIQHLNKGPSAASVSGVEHNDISSKSGESGFNVQ
g219.t1	MDSMPTPPPERGSSPEPWATPALALNAVPQLDRSVSTASSVSSHSGRSVSSRLSESGIPGKRRGYMRPEGTQFSDSAKNRESVMNLGTIAHLQYYFARTGLLDTATGRVAKSRKPGSRSPGGTEAEVDMSILSPVSPSLAAYDFGDSLVESPQDETASMDWEGGEPMMLPPTVSTYKQNPVYVPPPPDMTVLRRELRESLDEASKHLQELEKRFTGDDPLESGGSGPRSADAAGWHEIQGLNLLDVTTLAIRAAKNYYTAHEEPQRLYAIKTERDIRKELYEVLEVLKRLAIRNFANGVQPYEVAQIRQWIASISDLLDAEEEKERLEHAQRESWAWREGDWSGRERERELLFLKSFDNTTDSLPDWTEPTESEPQTPFLLALQNGLRLVHLHNSLVRK…
g220.t1	MTQNSFRGPAAAAAPAAAAENDSMSSLRTPHLVDSPASSEVAATPPDQPAPASSSTASSSPRTQLRRTASLNNSSSSILDSTTKLARNVSPALLARMKFLNQASSTDSPSKNAPSPGAIGRIAEHKIKQLDDFHSTKRTFSIERRGTAWSSGTGSQLGTPLIPQLTGESVPALVMERDLESDISSVISTSDRVLPSESEAETDDVLDMQKYRLPDITKTKSLSQTIAESDTTPVADLTRPPTPPPKDTPPLRIEDEVSVLDNHNDMDVASHFARRHLHRTNSIYTLSKASFSNQIQQLTSMKLPPTTIASEITALPSSTLAGRALHSSANDIRLWMAKATEVLNGLDADDDVEWAAAAGREGLADVDAAIGKFEGLITVYITAIEDLQSRPDIALLPLK…
g221.t1	MSSIYFGFPQCYDSQPVSSVMQKATAFDQIQHMLANLAISNYGEPNIYNPHTDTLHEANSKPAYERSPCAPTKSFPHPSTSGYTELDTTINTTTHHRLPTPATPVPSHAPWTRDLKELADPLTYEELSHLAHLKTARHESAFTLMQARREVEIETEKLNRLDAEVSAMQCGRRC
g222.t1	MGNHSSKPSCSTASNQYALRTQPRLCMWIMPLTHFDYHVHRNCDRFSRTAEYFPKHHTFIRELQKVLKREGVQPRELEFLKSFPENNSTIRCLAFFDKQPTPEDCCIILEHCPVGDLHTFYWNRAASINNGAFSEAFMWSIFSQLANAAAFLHEGIGCKNAGDANLWRPIIHRDIKLKNILVRSLGSNDDFSEITIKLSDFGVAAYYDPKAASDLNFAGIPAYGRQKLPGTRESALQQAISGPLKQCKEKWLEENAGKKPYHGDLSRADQAFWWAREAAPEAIPTNLAIDDQVKDDPQVFKRAEQLSWNGAEDESR
g223.t1	MTSLKRSRSDPPPPITIEDTASGEPPQPSPSPTAERARTFDVRPTYQHEESQSTAQQRRNSTFGHRRKHSPNLQWHEEWTDESWKHGRVLLVDYVGKEHAPEGKRKVVSKEFCDVDSLRRFYRKKSVSDQAALRVIHVQNAPWATRFLLGKFNIDGSHDLVGTTFGKWAQYERPLVRNNKPVPNGRTFRAQRDPWRGISRASFSCDYLKHFPRGKIQKPKKGTKMMELNGYDADDQPCYAYDALVQRLSVYVQLSNGTPGSATDPDIPNPYNEEEFEDYQRLKKSYGDVNANEHREKYIPKLNTLDNGSTIIVFESSQSGDVKDTLIGARQEIESRWRRLTFYLSREETSSDEALTVECMDYILKDIFKALAYNWDRFLATCEAHVGILEDKIYENPAD…
g224.t1	MFIRIAQLALLLCFALLVLGAEDYYKLLGLKKDASERELKKAYRSLSKKFHPDKNPGDESANQKFVAVAEAYDILSVEETRKIYDQYGHDGIEQHKKGNGPGQRHDPFDLFSRFFGGSGHFGHHGGERRGPSMEVRVAIPLRDFYNGRKTEFTIEKQAICSACEGSGSADGHVETCDTCGGRGAVIRRQQLAPGLFQQVQMQCDACNGKGKTIKNPCPICHGSRVVRESETHELDIEKGMPDGVRITYENEADESPDYVAGDLIVHLVEADAALGAQDHERTDGTFFRRRGPDLFWREVLSLREAWMGDWTRNVTHLDGHIVKLSRKRGEVVQPNTVEILKEEGMPVWHQQLENNDGLQYGNLHVEYVVVLPDQMEKGMEKDFWGVWDKYRKKSGVVLD…
g225.t1	MATKATTVAPLVQQYITSQKVGVVVSAGKMSRAVKVRVAGQEWNKTFRKHFPSHKHYTVSDPNNSLVEGDVVRITSGHRTSSTIRHVVTAIVAPFGEPVENRPRVLNADELDTLRTQERLLKDVRAAERGREASVQRLAQAAKQGVRIPTLEEAVEKLRVHEETEKTRAANKGGKEAHRGQGGQTETKRERRKAEKVKSRAERHAAERAESAKKQVV
g226.t1	MAKARVSLQRHAEQINVHEDGQNEEEVHSELGESMDPLDESGHTVDSSDEEIEDAVAEDMSRFEETFVGINKRFRLINRIGEGTFSTVYKAEDLEYNKFDNSWDIEERENKKWSSPGSRKRSKRPHYVAIKKIYVTSSPIRIFNELELLYDLRDSDSVCPLITAFRHLDQVVAVLPYFQHRDFRDYYRDMKISEMRLYFRSLFTALRAVHQKKIIHRDVKPTNFLYNPALQRGVLVDFGLAEREGTDWHPCACHLSDEDRRHRVTHSVYAQTQSSGHNTSSYPKNDTRNSRRANRAGTRGFRAPEVLLKCTQQTCSIDMWSVGVILLTMLSRRFPFFHSADDIDALLEITTIFGRKKMRETSLLHGQVFETNIPSYSESGHSLEKIILWCTGRTGDKTA…
g227.t1	MEARVDFDINEAIKLFDSDPATIPAPEAPRALQECEDDPEALSSLALINSELNPVVDAVAESPDAITRSSVFDTLQFLLKCVPARPACASNKTTAHESDLTVQSRNSAQIPPAALGKILDLIVSALSTQADIVHADLEAEDQDAIPHHKTLLEMYAFLFRWTISAVETRALEKSASAPAARGRGKTGKSKAGSSKDGTWDAAAQLETALDRVSKVLKLKLGRIFVTTSERDTFVGLFTKPVYHILENEARVKNAAIRNHCFRVLCIAVKHHGHAYTAQTSINQCLTYFEHLSEPMAEFLHTLADAYDYSQLAEDVLKDISTKEYSATDLKGPKSVSTFLIKISELLPNLIIKQGALLNNLLDSEAYTLRCAMIEVCGNLINMLSKLSQDDRSEAHKRNI…
g228.t1	MGKRSISEVGDAELSRKKSKKDKSEKSKKSVAVDAVEANGDNVDASEAERKAAKKAKKEAKEAKKAKKVEPAPAVEEDEDAVKAARKAARKAEKKKAKEAASANTTAPTSVATSAVASRVESSVTSPEPPASGEYQEDKELSQLPQSEIDAFLTKHVVTIDDPKPGHKLRPIINFKYLPIKNEAFAKFTTPTPIQAAVWPSLFAGRDAIGVAETGSGKTLAFGVPCVRYIQSLPKNKRRGVKAVIVSPTRELAVQIHDQLVTLAGPAGLGVVCVYGGVPKPPQIEACRTASIVVATPGRLNDLIGEGSCDLSSTEYVVLDEADRMLDKGFEEPIRQIITQCPKKRQTLMFTATWPPSVRELASTFMVSPVKITIGDNVSGELRANIRIKQEVEVVDPRA…
g229.t1	MADVTELRCWPSCVDALDWSQDNIIALASDERVELLFPNTVSYERDNEVPQWQHVPLQVPWFSNDELPVKDTAPLPNYSIGEEISPSVPTAIAWSPSGLAKHRRCALAVLTSNLVLSIWSAEGKLQAESSWNRRLLLNDALADFFSNSVTAQTSRVASDAEEQTRLRTRIRAFTWAPALPSASNTMGTQTSYGQEYLVIANDDNQLLFLGVDSPTSTLGLSQSWKATVLTHMSLELEEDCIFTGPLFFDDLMKQQRFISHVAWSPWLMQHDCYHSVVVYATNEEVRGRLVVHSNDRITLGAEVVYSGTSLRHSGPISWCPRIDEDGKLTLALFTNSGLVYLTISGNDASIVDEISHDLDGRWDQVSGAVWDYEKLPSPRLHFSSLLSTVQSPTAVLEKS…
g230.t1	MYEDNGLVGTHHPPSRQRLITVHRPAWKQKAQYIEVGGVRGKVEHALAEARQDHVRSGLRRRKRSPTTPRAKSVKMGIDLDRHHVRDGHRKVPKSTNPYVKLLVRLYKFLARRTDAPFNKVVLRRLMMSKINRPPVSLSKIIATAANKANAKTNEGKTVVVVGTVTDDNRLLDLPKLSVAAMRFTASARARIEKAGGEVLTIDEVATRFPTGANTLLLRGPKNARESVKHFGFGPHSNKKPYVESKGRKFERARGRRRSRGFKV
g231.t1	MADKRKVGVLGGGQLGRMLIEAANRLNIQVNVLDVNNSPAKQISAHDGHIEGSFKDAAKVKELAQKCDVVTVEIEHVDTQMLEEVVGQVVVEPSWKTLRIIKDKYAQKQHIKEHGVDVAESIDLEGKGAEGLKEVGAKYGYPYMLKSKTEAYDGKGNFVVKSEDGIDAAIKALGGRPLYAEKWADFSMELAVMVVKTKDGVLTFPTVETVHEDSICKLTYTPPRNVAATTAQRAQDLAKKAIAAFEGKGVFGVEMFLLKDDSLLINEIAPRPHNSGHYTIEGCDMSQYEAHLRAILDIPISQEDLRLKEPSIMLNILGAQSPDSHEKTAQRAYTVPGAKVHLYGKGDARPGRKMGHITLTAPTLREAERKIQPLIDFVDEQKGKALGPRTEGPKEEPLV…
g232.t1	MSQEEKVRSSVDAARDTALPVLPTINPDAPTPKPNAPASFHPAVYVATWITLSSSTIVFNKYILDTAKFQFPIFLTTWHLIFATIMTQILARFTTILDSRKKVPMTGKVYLRAIVPIGLFFSLSLICGNQAYLYLSVAFIQMLKATTPVAVLLATWSMGIAPVNLKVLGNVSFIVLGVVIASFGELQFVMIGFLFQVAGIVFEAVRLVMVERILSSKEFKMDPLVSLYYYAPACAVMNSIVLLFTELPTLTMNDINRVGGLTLFANAGVAFLLNVSVVFLIGKTSSLVLTLSGVLKDILLVLASMFLFRDPVTLLQAFGYSIALGGLVYYKLGGDKMKEALSAGSMKWAEFGQTRPALRKLMVFGAVVVSMFFILGSLGPRYAPDQTGKLYNGVQNGIG…
g233.t1	MGFAPSQIVMDEGKMGSSMALCPEMHQQPSNTATQSVNEYASSAGLQHIIMRRNVPWKKRLFGALCLAGPEMASNPPLCVYLPVLYRSQALQQQQHVLPGMDSVDSALANARMR
g234.t1	MLNYARQTLKRVPSFQELLQGTMGSNKEEINVDVLVIGAGPTGLGAAKRLHQIDGPSWLIVDSNETPGGLASTDTTPEGFLYDVGGHVIFSHYKYFDDVIDEALPRDDDWFTHQRISYVRCKEQWVPYPFQNNLSMLNKDDQAKCVDGLIDAALEARVANTKPKDFDEWILRQMGVGIADLFMRPYNYKVWAVPTTKMQCAWLGERVAAPNVKGVINNIIHNKTAGNWGPNATFKFPAKDGTGGIWIAVANTLPKEKTSYGKNSTVTKVEADNKRVTLKDGRVVKYNKLINTMAVDALVDTMGDKELQTLSKDLFYSSTHVIGVGLRGERPERIGDKCWLYFPEDDCPFYRATIFSNYSPYNQPQKDVKLATQQLADGSKPESTEPQEGPYWSIMLEVS…
g235.t1	MSLTNGTPLDIAQSAREGSRALAVLKTEERNAALITIHKALADGKEEVLAANAKDLEAANKAAAGGTLSASLVKRLNLGGPGKYEDMLQGILDVVELEDPINKTTAKTLLDDNLTLSRITCPIGVLLIIFEARPEVIANISALAIKSGNAAILKGGRESSHSFAAIASIISKALSSTAVPSSCLQLVQTHDVIADLLKLDTYIDLCIPRGGNKLVRYVKDSTSIPVLGHADGICSIFLTNDYPAEKAVKIIVDAKCSYPAGCNSTEQLLVEESALNTTLPVVAEALLKKGVSLRCDPSSLSALQSKLDSHSSALLQAAGPEDFDTEFLDFIIAIKAVPSIAEAISHINAHGSHHTDVILTNSESTARSFLAAVDSASVYWNTSTRMADGQRYGFGTEVG…
g236.t1	MRSTMRALAALASAASLFAPSIAQTYTNCNPTVRTDCPPDSALARTVNIDLSSASDSFTPQSNPTYGNDGVSFTISKSGDAPQLTSKWYIMFGKVDVVLKAAPGAGIVSSFVMQSDTLDEIDWEWLGADPDEVQTNFFGKGQTTSYNRGAFHADAGSQSGFKTYTIEWTPEQIVWQIDGVTVRTLEPANAENQYPQTPMQIKFGAWAGGDPANAAGTIEWARGPTDYSKGPFTMQVKSLKVADYSTGSTYSYGDTSGTWKSIKSNGGVIYSGGDRPVNSDSPQITATATGAPLPFSPSRTSSDYERPSVYPWIPGTSSATPEPTFGNYPGLPSGWTVSDSGKVLPPSSAPPSPLASSTASPAASQSASSGDSKPIVWTGYDDRGFTTIYTSYPGTTQAP…
g237.t1	MFKLTLLTLLLTSTLSFTSATFPSHKIRGVNLGSLFIVEPWMSRRTWRDMGCGDAASEWDCVVALGQDKANTVFQKHWDTFITADDFDKMKEYGLNTVRIPVGHWFVEDTIAPGESWPRDGMKYLDNVVGIAASKNISVILDLHGAPGVQVPNSAFTGHTLPGAGFYSPPNYDRAHTFLRNMTERAHTHASYASTFMFQVLNEPEHNHDSLVTDYYPKAYQTIRDAEADLKTPSLDRLTVQMMDSSWGAGNPRRNLPKGATDLAFDIHRYLTYSSTPATKADYLRASCTDAFDSSDNDNDNDNDNDNNDNDNDNDNDNDNDKPLVIGEWSLAIKQDSEWSNEFSPTKEENHDWYRKWWAAQVQAYEKHKGWVMWSWKTELGGDWRWSYSGAVEAGIIPK…
g238.t1	MADYQEEDLFDDLYDDEPASKPTPAAAAPPPPPPPPAEPEPKTEPQSAPPQETTQDAAPSWPESAVGGNDTNMDASAYDNAQNDDDNYGPINVKEDGKMFIGGLNWETTEDSLKGYFTQFGEVSECTVMRDSATGRSRGFGFLTFKDPKCVNTVMVKEHYLDGKIIDPKRAIPREEQERTSKIFVGGVSQEATEEDFTNFFKQFGRVVDATLMMDKETGRPRGFGFVTFDGDAAVDATLKQPLQILGKPIEVKRAQPRGNMRDGEDDKKFGRNNKFGNRDGGNNGNSGYDNQNQQQQGGTAGMTPAMMAQYWQRMQQYFQQMQQQLAAGGGGMPNAMGMGGMNPMQMQQMQNMQQMMGGGMNRGNGSPNPQNMGGGMNPMQMQQMQQMQQMQQQQMMQQ…
g239.t1	MKKQQQEMVPEMVQLDRSASHSPFWRTTSNTSNASTQSKKVIGASYSHADILSFGSLSVSGSTSRPRTPPSAGHSRDSSTAPRRTSSNVSPRAARDTYGSFLRQSNNDWGADDQDDGDIMFEDDEDEFGLPSIANARRKGRRKEPSKGREVAGTYAHTRNGLGSAGSTAWRSIDSGDIAEERGIPSYPTAKKREGKILRPQYQEILRDPANSMHLIEHPSLPPNATAKQIEEYSARTTRINKFKRILQASTISLSDLRDSAWSGVPSEVRAMTWQVLLGYLPTSSERRVATLERKRKEYLDGVRQAFEKGTAGSTGAVAAGITRASSFPSTIRGRGRGLDEAIWHQISIDVPRTNPHLELYSYEATQRSLERILYVWAIRHPASGYVQGINDLVTPFWQ…
g240.t1	MEQPTRPPFEELPLDKEGPPGNAWGLYGFDDELGALNMITPATVKAAAQEIRTGERVSLDWNLNLPSHPSFGRPSFGWRMENRTHPDGAKRFVNDDHLDINTQSSSQWDGFRHYGYQQAARYYGGRTQQDIENTEIIGINKIAHSGGITARAVILDYPRYLQKQGKAAIDALSSHAIQAKELKDMLAQTGVQARNGDLLLVRTGFTEQYDKLSEQERKELASKPPTFAGVESTKETLRWIWESGFVAVAGKSLDQDETDDSSDAPSFEMAPLVGDHNKPGGIWKGEAWEDDMQGGGLLHQWLLGGWGVMIGEMWDLERLCEKAEELGRWTCFVSSVPLKVPSGVASPPNAVAIF
g241.t1	MTTVPTFLSLPPEIRNRIYQYALTPATGLVYREDEATRKQKAFFCDSQIHCLSSTVSLDLNSLVELGQSKFHRPYRLRGVLGFVIIIQDTHQRSRNKRFLNDTSGTLLLLDKIRIQYPDLCVIYEPPCWRLDATAALYKACLFLGMLYSTVLRGNGIAPLLNPTGSFSITQLLDKDERDDPSWLKAVRVWRANHTMSLTATNFRFRPLNLDKNMSRSKGLVGLATAFDAESYRMKDAARAQIRQWVEIGL
g242.t1	MSSMTKISLLALIGAAAAHPSYGGHYKFHSHSKPYPTGGWSGNYNSTQVPAGTASYSQDKTSTIDVTSTSTKTIYSTVYPTPTSAVVENVSSKATGQCGPATVTITSTEKATVTVTPGASSAYSASLVSSVVALPSKAGEYDASSYIVVSSTPAAEKPTTSSKPADVTSSKPVVTSSSKAQYEAYTPSASLPAVTSVAQTDYSTAVPTSSVAASSAAASSSAAPKPSGTPTYSGTKRGLAYNDGELCASFGSNFGFAYNWAQTESKDVGAPFIPMMHKISDSTAEAWLANVDKAVKAGSKAVMGFNEPDIVAQANLTPEAACSGWKEYMNPIASSHPDVTILGPSVSNSGNDGQGLSWLSTFHEVCPDAIVHATNIHFYDIYESATIDRFKAQVEKAAA…
g243.t1	MIAGRGRQRIRPPRRGLHGDEIDFENTWATIEAAFREIHTKNASKLSYEELYRHAYRIVLKKKGGDLYQNVHNFERKWLGSEVRAGIQQLLSPNLLVGAQSLGGTTANERRVAGEKFLKGLKQAWGDHQVCMSMLADVLMYMDRVYCADHRRPSIFNAAMVLFRDEILRSPVSDHDARWLLGLLNHVILDQIQMERDGDVIDKHLIKSCVWMLEGLHEDETESEEQRLYNVSFEREYLDTSREFYKRESELLLRDSDAGAYCRHARRRIYEEDERCKQTLLESTGPKIQKVVEDELIKNRIHELVEMESGVRYMIDNDRLEELNVVYDLNRRVDEKKLELTQAIQKRIVDMGTDVNNDAIAASQAPAPVPAPAQAADPADKNKKVAQEKTINQQTVAAI…
g244.t1	MRSSVSFLRSCARTAAPRAAWVQPAEYIPAASKRFVHTPRTSTVTRPSPIILRAGLPSLARFESSSATLPQKNTSTQAPETRLDREQVPSYELTFTCNVCKTRSSHRLSKQGYHKGTILIACPDCKNRHLISDHLKIFSDKSVTIEDLMKEKGNLVKRGSLSAEGDVEFWDDGSSTPRSAHFHTESSPKGEERLTDKNQTSSQTPKE
g245.t1	MSKIFLIGATGYVGGTVLSQSLASTETSLKTLTVDILIRREHQAGRLRETYGERVETVLWAGLDDTVPCFFGEGTGLFNRQALVIPLVLRYVVQHGYGFKLNDQANFDWVYVVDLADYYIPLIRKILERPDRGVGHIPLGKKGILFPTVGRALVAEINQQAVETAFDADILLCEDTTQQREVRCVPIQEIADELIVGRCDIAPRG
g246.t1	MTQFNINIVSDTICPWCYVGKKRLEKGIAAYKQKHPDSDDTFSTQWFPFYLNPDAGKSLDKQETYAKKFGKERTATMNQMLAKVGHDEGINFKFGGNTGNTRDSHRLVQLGKTKGPKLQTRVVEELFAAYFENEKDITTQEVLIESGVRAGLDEKEVKEWLDSGKGGAEVDKEVQDAREQNISGVPNFTINDHFQIGGAQEPAAFVQLFERIKKMDGSL
g247.t1	MRTTASQLLLASLALGSAVTRGDKKHHGISKDDFIKVDGLRLYDSKGALHYLTGMNYWACMNLAADDQSGGNYSRLVTELDQMAAKGINHLRIMAGSEGAPTPQPFRMNPPLMNAPGQYNDEIFKGLDICLAEMSKRGMRATMTLSNEWQWSGGFGQYISWANNNTQIPYPESWNLTASPQRSTPGTGWGNYTKQGVDAAPYSEFTGFANLIYNNSLAEGWYKDHIKTVMTRRNTVTGRLYVEDPTIMTWQPANEPQAANALGYVGIGLLPNPDDLLFPWVDRTTAYIRSLAPKQLISLGFEGKQGEFYFKHAQNFSTIDYATTHCWVQNWGIYDMYNSSEANLKAAQDFAVTFMHNSSKWAADIGKPVFLEEFGMARDNWENKDKDYPYLSSASTTHK…
g248.t1	MRSPIEFEKDHHYDRCRDSIDSDFSSSDNAAEPLAQADDVVPPPPPPPYSAFSLNRRRFMLGVVTAAGFFGPLTGAIYLPSLVLFEEIFRASATAINATVAMYMVVFAIAPLFGAVASDVGGRKLVYMVGLGSFLVANVLLATLPAHIALLFILRIFQAFGSCIVFSVGAGTVADITEPAKRASALAWFLMGPQLGPVFGPVIGGGFADVSRWRWVFGFLALTCLPVYCAIIFCMPETLRSLVGNGAVLAHQPWFSIPKLRTQPNTDIKGPKVPRPSFRKFMRLLKYPPHLIVSFNGAFQFAGLYGLYISLPTVLKDTYNWSTAEVSYAYLAPGISMFIASIIVGRGSDWLRRRSIAKSPDGKVAPERRIAYQIPGFFIAAVGKLMYGWSCQNRVSPAA…
g249.t1	MASYLSLVFVAVFVTIFGVVSFFVYLFTPPSNFPKNIPTIPFYYALLPLFKDVDQAELYRRYMKDPLEKYGAVKLFFGGQWNILVRKPTYIAEVFKYEDVYAKAGNQIKIPHSLVAEYTGENIISSHGEKWKLYHGVLKPALQADQDSTKIWENSRLLRNMFLDSSKQANGAGIPIYVPLHRVALANLSDVMYASSFETMQRPDAPLHALQMKIKPIIFNPIFMNFPFLDHLPLKMRQLGRALNRNFRNTLRTSITKGHNHVCDPNNHKNVACRLIGAHGEGRLSDKDLEDNMVSTFLAGHENPQLALMSLMYLLGAHPEVQDAVRKEIQTLYPAGASGDYEPSYTEIHDLPLLTAIIYEGLRMFPPISQLINRRTTEPVLLGGKISVPKGVFLGYNAY…
g250.t1	MAPFNKGVSTYHCIQGLYWRESNGELLAVEGSNSKSLPEVWPQLKDEILSSTASWARVQLPSGKEIKSLQITSDVPALSNIKSNFPPSYQKEELHTLIAEIEHDNGRVLGMVTSKPKSLASDSFSIWAERFILLETQFQPFANISDSSTPWAAKNREICQTIAEIFERKLKNLSKDDQWNVCGREGFLNRVYGFVDKNLPILLALPAFPCKSPNPNKAGGIMPDLAENIALDVLYDFIKEVNAVYEPGATMWIINDGHVFSDCIGVDDEMIDTYDACMAEIYKERFPGQTAPAPAMDFKGLKNIFNSDSEGFQTLKKVAGNAHKMPHPVKTKMTGEAELCRRLMLGIGGADRAFIRSLIEQQEPETLGLYRGQTRFMLEDLADVPSVKSLSGKQKKKTA…
g251.t1	MRPLDVFRVVMPIITLQFHGAAATTNTTLPRTYGIVLFRMFDLLDVHGPIEILQFLSGLYKIDIALIAETMDPVTSEPLMASMNPFNSSVYPVLPPSHTFATAPELDVLILAGGPGWRNPALNATLDYIARTAPNVKQVLTICTGSALAARAGIMNGRKATTNKTSWPNAVKAGPNTTWVPHARWVEDQSSTPPIWSSSGVTAGLDLMLHFVEQTYSERNATFIANILEHQRITDPSFDPFARKECVSNRAIVRSLHERVFDSRDSVAGITMWNISGTINSPGDQCTCQEDEKSQWSNSFPAPYPYKAYRCATYHLERRPQKEGLLQGVSFVAPICKAPLLGAY
g252.t1	MDHSGHGMVASTTATVMSGMSDMSGMTQTATGTAAMASNTGMSMGGGGMNMGGGCKISMLWNWYTVDSCFVSRSWHITSNGMFAGSCIGVILLVILLEALRRAGKEYDRYIVNQYLASHATVAAAASSASSDDDSRKNPATTAAIAPTAQSFRPSVIQQAIRALLHMLQFAVAYFVMLLAMYYNGYIIICIFIGAYLGYFICGWESFTVGRGGSDRMQENATVCCG
g253.t1	MAGGPSPSSTSPSNLSNSPFLHGSLSSSNSSSPPKLFAQSTMTADVFAPSHTYNMPGAIGERRPMERNGLSMLSFGDADAPPDNRTRHAIFLRKLPSNSDKEAVRNILLFAKDLVDCEMVPQTRFSEDKGFASAIAYFQTYDGAKEARDLLNGKRNATQDATLIVEVLQDGLGGAIGSRRNTVDSGSARHGSIASSTGIAGASSNARQSSRYNGTFQNMEKMSPPNGTPGLGNGEFGVSNLFSPTSPVQTSFASRNLGKSVINDEADDDNDLLNESIGYATGGPPAQSNMSRRATNPNPPVPVSRFASLSLNTNSVNGMGSPPLNSYTSPRSAATMQSPGPALSAMSPHNAPSALNTGPNTGFQQYSSHFARPTYPPVNPADQNPPCNTLYVGNLPMDT…
g254.t1	MPPRMRSSKFSSLPRPSPSQSSTRPQSITQSAQPSRQFSQTPCQQVTLRRRKFYEWLNGPGRQLKEPIPKSTNYLGAYDRYGNLVRAGPWYQRGAAKPQEEGQTKLTETTNEAAASTDEAKTPEGQESLDELESAARQADKKKADAAGKQDNSRLPPETAEDLRPFPLNQYFRSQPVLSEDLREAIYQRVKRDGATVSLASVEFGVSNERVGAVVRLKQMEKEWVAQGKTLAVPYSKAVLNMLPTTPHIDTSDPKNKGMRPVIHEPINDLIVHPATRQQLWVPVAESRHFTREDAGKAFDNNLLPADERIPHPELVKAERELASGLSFEERRKLAEERFVAQSAQKKREEEAKQAEMRAQKVVPQRRWDFVFKDISVESAGRNGRDARGVGWRYGLPHQ…
g255.t1	MAQKATKTLAAANTKRLNTTLYLTLSIHTLFWLLRALVFRSSFTRRSLFLYLILSAPQLLINLQFERLSRPTHLPDGSIKRPGEDLDAPGLTEYMWDVTYWTYGCIALASLFGDWVWWGMMVVPVYSVYSLYGVYRGFRGGGGGYTDAAGVPQPEAAQSKRQAKMEKRGGQRVAYR
g256.t1	MSPPPSAANAQLRQLIHYHLDNGFTENALFLAGRLHALDTRNADAAHLLALCNLRLGRYKAAFEHSKNKAAQAQHLGCVHVFAQACLRLGRFELGATALEKARGLWHGRNHWNKHSETSRRHVPDAAACFCMLGKLWAAHGDTKKAIDYYVEALKLNSFMWDAFTGLCDIGAVVRPQNVFTITPTMLESISHAAVNGHAPQVALPKEDLETNNPFVSRPEDDPFNPPTRQRGDVGLNMGGTNLLSKLNGRNPAPSATRHHNVETPVANGQDPDEDDMMMGEGGGPVMTERGPADIMHAPGRKIRMQPFAAVEDPPRMRPMTSRMRTKTNPSDGEQTDIPRPVNQNGHKRTVSGHSTHTQHTQASQLHAVDPTAAPPRRSARLFNHISSITSTRTTNRPP…
g257.t1	MSPKRKPKTQALPTPAPENISNREYYRASETTDTSPHADELMEFPPGPPAEEQQDGSGERSEVQSREQDDGGFVELSRPGRPSPSPSDIVARCELEDARAMGDLERSTRGLERRERKRLLIALQERRRRDREVQAEEGERRGGEERNAEYDEMQRKGREEV
g258.t1	MADPTYRAAQPGEFFCPAGGKCCETKSSSSVSRKHSSDALSLRPAGRSTALDNQSPGGSCGGQTPFWTCAQAPSFYGCCNEDPCLNNSTCPEGKLEPAFWDRPDQYEYFKDLNILLSSTAPRSTSSPTPTTSSKPSSGSKVSGAVIGGAVGGSLAFIAIITAVVFLLCRRKRRNREQRSRSSSGGPMEENKPEAGELASPLSAAPPTYSWDANGNSPVQQRWVHNHASGHELPGEDSRDPHRSPYSELHSKSSLARIAELPGGTGVKELDTPEITPKPSHKEFENDMVKREYGLGLNTTQKESGEITGKR
g259.t1	MDSSAPADDVAAPANTAAADAAAALAAPANTANTAPANTANTAAADAAAAAAAATAAAATAAAALAAAPALPPLPPAPGPPTAAALLAMPPASRACTRLASRPVQRQLEFRAGYEPSKFNLAVRQQNLESALAQVVGRVAPTECDSCQRAAGPYTTCVVVTGQLLDSCANCHYGSEGARCSFRPTPAPVVPVPAIATPSRSRRQVAAAAPAAAAAPAPAAAPATPSKKRRRTTATPAASPAAAAAAATTATASKKEKKKEKRKRKKKKVRKCVRDVKKSVAALELAMDSSSSEDSDEDDED
g260.t1	MQVPCSACGALHWIDERKSTTSVTDPRFTLCCLDGEVDLPALTPLPSYLYQLLNTNTLAARHFRKELRAYNAAFAFTSVDCTPTSRGAQGPGVQVFQIHGALYHRSGPVEVLKGSLPQYAQLYFYDPQYAANARHQRNSHLQLQILQDLTAMLYEINNPYISIYRTAQDRLNSSAADARVILTSRLTLALETGQDRRRENVPTSDELGLVIPDAAGAETSRPIVLAARNSSALFTISAAHPSYMPLHYVLMFPHGDSGWRPGLTLRNQDGSRLQTSLTQQTYYRYYLHPRPGQTTNPFRFYRLFQQYVVDIWAICDQARLAWIRANQAQLRADLYSGVADAVMGNNDAQAGPVGRRVVLPSSYLGSSRFVSQCYQDSMAIVRRYGRPTLFITFTASPYW…
g261.t1	MPTLNTDMSVKTELSQKDAFISERSQHRNSRITEYQLAVEEEGESIRTASECAEPLTPASHTSGDVPFSHSFHPEDHADELYETSKPAMGFDAVDALHPTVKDETRPELRPTSAHSNGKNATQHKAQASSERRGLGRRVGSFVRSRLHRRNTPQEDPKDLGLEPHISRQAPEARSDINQLLVVDTAEESTNIDSSAISFPRPSSRLSSLSLSRSPPRSSRAVTPPPFSDSPISDTPAEEKKRKSGLERKPMSSTALSSLSPSKPGITWAEKAHGNKRHTWSRRRSASTDQMPRFGQDENKPTAGMLNTFSKPPEKGVGMKARRLSLNLPSDYIIDQCELEKEFKSSSLMPGKRGKVLGKGATAEVRIMARRGVSKDEQLVAVKIFRERNPEETEEDYIM…
g262.t1	MSDQKKYSNKLQGLRILIIGGSSGIGFCTAEACLEYGALVTIASSNSSRVEAAVSKLQSAYPSAKSGVYGLTVDLSKSDTLESELKTLFDQTVKNMGGEKLDHVIFTAGDALATMKLADMTMESILKAGQIRFFAPLLAAKFVPQYVKNSHESSYTITTGSISERPMPDWSVIGSFAGGHHSMVRNLALDMKPIRVNGVSPGVVDTELWKMPKEEKEKLMEQMSKKMATGTPGKPEYVAESFLSCMRDYNMDGAMIRTDGGGLFM
g263.t1	MRLHAALSLAACLAPVSAIFEDDAYHIDFHYALLGLPKRDATFFQKPYGGSKASLLYSISENQTIGAINPKDGALVWRQHPASEPRSKGHLRAADEQDTIVSAAGNRVTAWSSSDGRLVWETNVDGAVVEDLEILEQEDGITKDEAKDAIVLVSGTSHGVKRLDGKTGRVKWTYEDTSSDMPFQVSTSPTTIYYISLHPSIIGAGSKLKVTSLSPITGKKLDQYTLSSDTEITSRDHIVFAGANTAAPILAWTDKTNKVLKVNIIGTKAVTSFNTPGNYAIEKVVLHAPGHVNSQAHFLVEYQTAFGHSAEVYHVDLKKNTVSKAYSLPELQVRGTFATSTSDANVHFVRITEDEVSVVSSTSHGILGRWPTAGSPALAGGYPVHAVSEVVVKSGAATA…
g264.t1	MSQREYHIVVLGSGGVGKSCLTAQFVQNVWIESYDPTIEDSYRKQIEVDGRHVILEILDTAGTEQFTAMRELYMKTGQGFLLVFAITSASSFHELAELREQIRRIKEDDNVPMVLVGNKSDLEEDRAIPRPKAFATSREWNTPYFETSARRRANVDEAFVDLCRQIIRKDANERRHPQAIDPRTGGGPRRGGGRRDRERRPRHRPKCAIL
g265.t1	MSAPNANKPNEGIVGQIGNSIANAANYVSETVQGNAAEASKEGNKQQAKGNVPGQDSISDRVSGAMGAASDKIDQSKHEGSAEANKRSV
g266.t1	MALNFLSRRSLKGEKATLGTSFGSHFTPLGFIQLFLRFFQFVLGITVIALYAIDLDNARKAGKYTDSKWVWAVVCGTLGAIMALVAMLPSVKTWFFFFVDFFVFICYLIAFGIFGKMYIPENAEGNGGITRMKNAVWVLLMNMLLWFITAAWGGIAFWRNRSARTTHTGRANTHV
g267.t1	MADERPTGLKANKGIELLTWGTPNGWKASILLEELKEAYGKDYTWQGINISQNIQKEEWFTKLGPNGRIPVIVDHDKGGFAVQEGLAILTYLTRHYDPEHKFSFDDDLDVSRAEQWMAWQHGGLGPMQGQANHFNRFAKERIAYGMQRYTGETERLVGILDKQLKDNDYLVGNKYSIADVANFGWIHMLRFSGVELDSFPNLKAWWERVLARPAVQRGLSIPSKSGFGNDTYLQKLKDDSEFAQKEHELREKVNAAKEQYGYKYSSP
g268.t1	MYLRTSAVSAALWLAVSATPTYGSSTNTTIEFKHWPANASRALSNMIVQNANQSNYAVFDMDNTSYRYDLEESLLPFLENRGILTRENLDPTLKLIDFKDTANFTETLYSYYLRLCEDDDFVCYPWAAQVWSGFTLRELKGYVDELMALNTTIPTQYWDGDEVVNSTVNSPQVFRGQAELYNALMDNGIAVYVISAAHEELVRMVASDPKYGYNVPPQNVIGVTTMLVNSTSGFLTNARKQIVEGNYDPEANLDLVLGPYLWTPATWFAGKWAAILTYIDQWKRPVLAAGDTPGSDSYMLFHGVDTAKGGIHLWINRRDAYWEEMQGEIRNNTAAQIANGREVTADKNWVVVKPADIL
g269.t1	MAGILVMGVALGLQEGGKKIKEKRDERKAKKAALAAEAYGPAESSSSGAVRGHATHRDSRPGRKSEEARREQQHHSFSSEEAHGEDAPPGYEEVVRPTYEEAMREDLHRN
g270.t1	MPRWAASVNRGGVLDRIEAPVTLRGYLLCVFAAFGGILFGYDSGYISGVLAMNAFKQQFGGPSTAEDAYHGRLYQTWEKSLIVSILSAGTFFGALFAGSLADWIGRRSTIISGCGVFSVGVVLQVASSTVSVLVAGRLIAGIGVGFVSAVIILYMSEVAPKAVRGAIVSGYQFCITIGLLLAAVVDNSTMNRMNSGSYRIAMSLQWAWALILGVGLFFLPESPRYFVKCGRLDDAAKSLSILRGHPADSKFVADELAELEANYQHESKNMQSGWLSCFSGGWRSPSSNLRRVMLGMALQMMQQWTGVNFVFYFGTTFFKTVGLKNAFVISMITTAVNVGSTPISFWTVERFGRRMLLIYGAVGMLVCEFVIAIVGTVSEGSHAASMCLIVFTCFYIFFF…
g271.t1	MSAGPLPHPQPPTTSTPPAPPASSAEPTVTTSNTSTQPHTPHTPQRGDTAQPLHHDETPHPSRHDETPHHVATHDNTTHDNTTHDNTTHDNTTHDNTTHDNTTHDNTTHDNTTHDNTTHDNTTHDNTTHDNTTHDNTTHNNNTHDHGDLQPVTHLEPDSGSDTDSAFDANSSTSTSLASSILSYEYSNGRRYHGYRSGAYVLPNDEQEQDRLDLLHHIFTLILGGNLYDAPIHPPPRRVLDIGTGTGIWAIDFADEYPGSEVLGTDLSPIQPTWIPPNAKFYIDDAESEWVYSLDERFDFIHVRTLSGAIADWPKLTRQAYAHLHPGGWLEFQEPVALCESDDGTIDLAEALLRWQALCNDAAKVFAKDIRVGHTLKQRMLDAGFVDVAEKVVKVPIGP…
g272.t1	MAAALAHLMASAAAALPVLAASLLTYALALAVYRLHLHPLAKFPGPRLAAVTSWYEGYYEIVKIGHYSRKISKLHDEYGPIVRVTPHELHIRDSLFFDDFYAKNLHLDKEGWDVRFGTEGGVLTTVNAAFHKRRRAALSPMFSRRSILDFIHIIYRHIDTFSVRMQEFEARKEPLNLTHAFPALTGDIIMDYFFGFNYAQLKHPEFESFHDAFQKIGGAGHIATQFPFMIPMMNSIPDAVTEWLQPAAKNILKFKRDQWSNIGRTMAGDPVKTNDAKKTVFQEILQSKLPDEDKTQKRLAEEAQIVVGGGVETTAFALCIASFHIINTPRIYERLHADLVAAFPNRSTLELYPLEQMPYLKACITEAVRLSYGLSARNPRTRRTTPLQYKDWLIPPNTN…
g273.t1	MTPEEASSLFQKFMQASPRTHAQFGGSGLGLYISRDLAELHGGRIGLSTQAGFGSNFEFYIKVRRDQTAELAEPPLDLQHMNMASPAMQQHVVPTRLKSEATPENQAAHEQSSSDSKPTILIVEDNLINQRLLRRLITKNGYDTLAANNGEEALGALSTSSWNPLHAKTHGGSAQRLDMVLCDLEMSVMDGKTCVRRVRQLQGAGHLSSAIPMVAITGNARAEQVQEMKACGFDEVITKPYQMGQLLAVVGKYVRQTARQPTRQPTRQST
g274.t1	MVMYEGPLALLLEYLDASLQPTFVLHLLDPDPNLNRETQEVVLQHTNPALQRFRSLHAELVDLSQTTAAFTNSFSSLSHSGRTLHAGLLESLVLFCGAKWTVTIVGDRWLVAVSTEQHGGWTVSTAAPEGRGAETQKSTNAALSIRDIPHRPPLGEILPHGHLGDLDHLKWMREYNWASSPCGLVELWPAELRHACEFALATSDPINIAWGDQYTLLYNQAYSVVVGEKHPRAMGRPFKENFEQWKEHYNLRRILVRDGFSEETFANLYMAPMLAADGSVAGIFTHVHETTHEVISERKTQILTDINKAMAIAFGVLDGASSDVHFSAVYSTGLKNDTLDLTLQATAGLNENHHKTPPRGDPDVPQFGLNRVLLEVCRNYESRILSTYDDSLTQSTLDQ…
g275.t1	MSSPFSTQYVTGIYLPSAVLLIGTAAFKSEWLPYALALTAILTGAVLFSSQGGGRKVLKPDAFQEFELGEKTVLSHNTAIYRFKLPKENDILGLPIGQHISLAANIEGQPKEVVRSYTPTSSDNDKGFFDLLIKSYPTGNISKYVANLKIGDKMKVKGPKGAMVYTPNMVRHFGMIAGGTGITPMLQVVKAIHRGRAAGDKTEVDLIFANVNPEDILLKDDLDALAARDPKFRVHYVLNNPPEGWNGGVGFVTADMIKEKLPAPASDVKILICGPPPMVAAMKKATEGLGFTKARPVSKLEDQVFCF
g276.t1	MATSQLTKSVVEAIKERRTYYQLNKEAPISDSKIKELVEQAVLHVPSSFNSQSTRLVVLLNKDHEQFWDYVVEVLKPLTPEDKFDGTKQRISGFRAAYGTVLFYEAPEPVENLRKQFPIYAHHFGDWSEHTNAMHQYALWVALEAEGFGANLQHYNPVIDQKAAEHWSIPLEWKLRSQLVFGGRAGEPGEKQFQKTFGERLFVHGSKE
g277.t1	MAGFAEPDTVPTQRVFYRPAPVPEREPAPRRALPNGPCNYRDASVGPCGCDQFWDKSSAEIHDGSTHHRPPSERVPWCVCGHHACFHLRTSRAPEQPPSATQTGAKHLEQQVNVEEAPSAHEERIQKSFHGSSQRLQRPAASEANGSGRMLQSRDTPSQVSTTGLPGLPSMCMLPHDRRPAADDEARHAVNRPRGSVAGLGLSMLNMESMRSINRQQSASPTVADDSVPPPLQRAFSEPERASTRDSSMPADSIRLLSDLRGPLEQIKEFNRNLHLDVAGDTIPNTLDPHDFIQSATEAATPSIRGTPDLRAADNAVQQGKKLIDALSRLTSNKPGPNGSPNKPASVTSVPSQRLRQINSPSGQQEEQLQKVLRSASPQDLQKLVSYLAPLHNLLNSIP…
g278.t1	MALDIKELAKEWLELDQDKSTRDEIYQLLHHGNTAELELRLRNRIAFGTAGLRGPMQAGFACMNSLTVIQASQGLAAYLLKTEADVKKRGVVIGRDARHNSEKFAKLTAAAFVAKGIKVWWYETPSHTPLVPFGVRELGAAAGVMVTASHNPAKDNGYKVYWSNGCQIIPPHDTGIAQAILENLKPVTWDTSIVDEPCLMVEGSLDLVRDNYHQAVLCAAQPAHPIKLNPDLKFVYTPMHGVGLPAMKRCAETLGVASQMTVVEAQAQPDPDFPTVKFPNPEEKGALDLAIQTADAASSNLILASDPDADRLAVAEKVGDRWHIFTGNQLGLLLGAYIFERYPASKPREKLAMLASTVSSRSLAALAAKEGFHFTETLTGFKWLGNVARDLEKQGYQVA…
g279.t1	MDVQTQRKARIFSRREIEGQIANGRAIVIVDNRVLNVGAWMPYHPGGDKAMRHMIGRDATDEVTRFHSSQTLELMNRYQIGRIEGRWTNFLPPIQGGKFRTQAELERLSEDEYLESCSSSDHETASSTCSADQSPVFEPADKTSSIRQRTTATIARASSSSSVSSIGLDDASGPPKMSVLDRRTQQELDLDKAKYPSTDPQTQDRITQKYRDLHEEIQARGLYNCNYSSYAVECLRYGTFIALFLYALYSGWYITSAIPLACVWHQLTFTVHDAGHMGITHDFTTDTTMAMFIASYMGGLSACWWKFNHNVHHLVTNDPEHDPDIQYIPIFAVTHRFLEGLTTTYYERVMEYDAAAKLLVRIQHYTYYPIMLFARFNLYRLSLEYLLGGKGPKKGPAWW…
g280.t1	MTSPAAAAALPETEDFESITGAQESAEPASSSSTTPTPTPTAASSRENSTSSQASVVHAPASSTQSSAATQIPSMHRPSLARDRTLNVSGSPSPASSALNSRDASPARSLQRNTNAPPASTARSQSGLRSRKSSTDVSPNRGPGTNSPGLSAAAIQRALSSTSIPQLPPVSSSDSVKAPRPLKSPSALVSGDSTPHWPHSPRLKSPPPPDARSHSRSRRNSLRSQTRRPEAPSTPSIVVQHSSPSPASTSRAPAADEAVTPGDQDEPIMSLSMKAPSRGASGVAPKLATVQESSLPATPGFDGVEPQSFTPTATTHKKFEEDRNDVSSSKVTEDLSSRNNNANNNNMHTGSGSDSGTKNGRKGKMQEQRSSSTHRVSSNVSTKPSLTSLSSRARDPPLR…
g281.t1	MLSRRFLSLAAWLVAFAAAQSCVTDNDCSLNGLCLPSTKTNATSTCRCDPGWFGDDCGRLDLAPAARYTGFNETNATAPNHYSNRGNSSWGGQIVQDRDDPKLFHLIYDQFAYGCGLSGWRPTSFIARAESTSGPQGPYIWRQNITSSFRHNAYVYWSPADRKYLLWSIGVNIPDPKQCGGINKAQWPNNISVSSAPTIRGPWAPFKILINGTNPAPAPLWSPNHPTGETILAAEDLSIFTAPSYDGPYKQVFSAPWNTSNYSPTWAEDPFLWRDKRGHWHALAHWMIDITERGVKYPRVGTHMYSRNLTGPWTFKLQEAFNSTVNFTDGSVETFNRRERPKLFFSDDGEVTPLYMVNGVQRLGSSTESYTLVQPVGNKWRELEAGLGFS
g282.t1	MDAMITAPAPEPERLTEDLDNLSLSPFGVARSSVNETPLSDDEVRLMTDYFHASLYMCLGMIYLRRNPLLRDPLTLDHLKRRLLGHWGSDAGQSFTYIHMNRLIKKYDLDALFISGPGHGAPAVLSNSYLEGVYSEVYPDKKEDEEGLRRFFKYFSFPGGIGSHATPETPGSLHEGGELGYSISHAFGAVFDHPDLIALTMVGDGESETGPLATSWHSTKFLNPITDGAVLPVLHLNGYKINNPTILSRVSHKELEALFVGYGWTPYFVEGSDIPSMHQAMASTMERCITKIREYQKQARDSGKAFRPRWPMIVLRTPKGWTGPRKIGEHYSEGFWRAHQVPITDVLTNNESLKKLEEWMRSYEPEKHFDKDGKLIPELRELAPKGNRRMSANPVANGG…
g283.t1	MSDPVEVKAYGGDHHVEKAYSQVEDAHNLDEKALAAQYKAAAIEAENVEHDMGVLQAIQAYPMAALWAFIMSCTIIMEAYCVFLMGNFIALPAFTKQYGVPDGEKMIIVASWQSALQMGGPVGAIIGVCLAGPLTSRIGYRWATITGLMLLNVFIFVFYFADSLPVMFVSQLLEGIPWGIFIANAPAYCSEITPIQLRAPATQMLQMFWALGAIIVTGVTYFYNTLDDESAYRIPIALQWMFPTPLAILLWMAPESPWWLVRKGRLEEAEHAVARLGRAATLNASEAVAMMRRTIDIEKTVKDPNHLELFKGTDLYRTLIVCGVYAAQNLTGNLIANQAVYFFEQAGMKTNTAFALGLITSALQAVFVMLSWILTSYLGRRTIYVWGSLINVGFLIALG…
g284.t1	MSVRVVARIRPLLKQELDRDTIVTAEALDGDSTATVVRLPSPKNDAESFSFQFSSVYEQEATQQQLFDAEIAPTVKHLFNGFDLSIFAHGCTGTGKTHTMRGGKSLADRGVIPRLLSAIYRRCKKVEKDTAGATNVEVALEYFEIYCDRVYDLFEPPEKRTPSGLPIRDNHGKTVVVGLTEKPCTTLKEFEQLYDQANMNRSTSATKLNAHSSRSHAVLCVKITQTTETTIRISRASCIDLAGSEDNRRTENNKERLVESSAINKSLFVLAQCVEAMNKKQSRIPYRESKMTRILSLGQNKGLTVMILNLAPTRAYHLDTISSLNFASRTKKIEVAEVENDPVYRSMTKPLAVTSSIGGANIKRQPLRALTAAANANVTETGKEKKGEKPVKAFSVYSD…
g285.t1	MINGPSDELDVGAGADGASLGPAGASVGEGSTFVTEYGGPEEAGPLGVGSDEAMGDDDAASVLDEELGASPVLGDRVVADSALVDTEDGAAEITILDDEDAGVENTGGVSAGAEDGDGKTVVYCVTITTGGTCSDVEGRSSAEGDCTTEVWTEEDTGTAGTAANAEVEDMTDTAGALDARVEESAELATNDTCDAAGVGKTVVYSVFVTTRRDEVIKVELVGGRTTELGDGSEDTVELVVLGAKNAAVVLSSGEYVNMGGAKVGTEFDGLVEANVGCDEKTEPSAVARDVDETSSAVLRDRDTSTVEEATDIVFA
g286.t1	MADSQSTTTSAKPRTSSISQVSESSQTAAEFIKEQLSLEAEAREALPYQFDTCTRDLGPLRQSLYACLTCSPPPASAAQVHTPAGVCYSCSISCHGEHTLVELFNKRDFICDCGTTRMPENVPCTLRINAKTGQKGGVTGEEAAKSNKYNQNFKNRFCGCGEDYDAHQEKGTMFQCLGLGTVVEGGCGEDWWHPECLVGFTREEYAKSIEKPEKKDTNGTDVNTDVNVEDKRHEIGIATPILDAAALERSGEDGNDMATAVEQNEDEDTPLPPGFPPEDDFDHFLCYKCVEANPWIKKLAGSPGFLPPVYTQKALNAVQPTETATSALDATNDDSKKRKASDADDDELNNTTLSIPVSAKRQKSENPSTALSSTPEATTVLPTTPKKEDISTCKLVSLP…
g287.t1	MSSPLRSNMSSANRGAGPSRNRNKRSRDDELSSSAALPPSSPMASSPPMLPQDEDADMLDEDDIIRDVDDLDEEAEEAEGIDLFADDFENDYSRRENDAYEGEGIDDEGEYDELTLDQRRELERRLNARDREARRRMPAAFLPDDDDQDGLADLMGQGRRRVRRHRYDEDQDDMDMGDDIMNEELTLEALTDVKANNLTDWVAQPQVARTIAREFKSFLTEYTDENGTSVYGTRIRTLGEVNAESLEVSFDHLAESKATLAYWLANTPTEMLKIFDQVSMEVVLLHYPDYERIHNEIHVRITDVPVQYTLRQLRQSHLNSLVRVSGVVTRRSGVFPQLKYVKFDCTKCGTTLGPFHQDSNVEVKISFCQNCQSRGPFTVNSERTVYRNYQKLTLQESPG…
g288.t1	MPNLRSIYGWRTGDDESEPDPETNVFAKLVSRSCPVEYIELRAPKLNMVNFRLLLGATIPGKLKTFNYEVGCTWAWCLTEHPKIMASLQLHHDTLESLGLSHEYYYPYEMGDESDKPSPCSFTPFVAIKRLKVAPVYVWGHLGFTDKARLKSLEAEEMLWKALPRNLEQL
g289.t1	MAPKKSKRTADSINSRLALVMKSGKVTLGYKSTLKTLRSGKAKLVIIAGNTPPLRKSELEYYAMLSKTSVHHFSGNNIELGTACGKLFRCSTMAILDAGDSDILTTSTEN
g290.t1	MARRPARCYRYCKNKPYPKSRFNRGVPDAKIRIFDLGRKKASVDDFPLCVHLVSNEYEQLSSEALEAARICANKYLVKIAGKEGFHLRVRVHPYHVVRINKMLSCAGADRLQTGMRGAFGKPNGLVARVNIGQILLSVRTRDTHRATALEALRRCQYKFPGRQKIIVSKNWGFTPLKRDEYVEKRREGKIRIDGAYVQFLRTKGPLDYNMRRFPEAFEQEA
g291.t1	MMASNLLSRFLPSATDEPFEDDPLNPQPRRSSASTDGQRDMDIDEENFGAYFEPQDLEHLLEEASGSQMTTDSRAVSPEARRKPNAPPGINTANRAAGWKQPGPARPLPLDDDDDVPQSLLLEGGPLSPHATRRTDGLPPPVPGPSTRQTRAQWNTTQRQQQLHADMAGAPASTWARAAHFNINPKEKALWMWVNQTDLDTYMKDVYEYYRGHGIYSMLLKRILTLLQSAFVVGFMTFMGWCIDYSKLSQSHKTSEVLVPKCTSRIHGFWIFAIWIFSSYWIYSFYTMVTDIPRLRAMHDFYHHLLDIPDRDIQTVEWQQVVSRIMALRDLNLATASNLSPETRKLLDSKSRQRLDAIDIASRLMRRENYLIALFNKEVLDVTVPIPFLGNRYIFSETT…
g292.t1	MSTSYFQERSTPASQTGMSPASPQVGAGSRGVNALSSRITSVLSASYADLEIRGALETIDERNIQNTAETRRQIRLDVQKDVIECNGEIVKDFGQVAEQLRRIGAAITSLNSSCADMRAHISTAARETGPVLEEATSLINQRKQIETKHQILNAFSSHFRITEEQATVLTSTAEPVNEEFFQVLTRVKKIHHDCQVLLGTEDQRLGLEILEQSSKQLNGAFQKLYRWIQHEFKTLDLENPQISASVRRSLRVLAERPTLFQSCLDSFAEAREAILSDSFHAALTGSNSGTSHIATKPIEFYAHDPLRYVGDMLAWAHSATVSEREALEVLFVSDGDEISRSIQAGLESEPWLKGEGEQEVFDGKKALNQLVSRDLTGVARLLRQKTEQVIQSHEDATLA…
g293.t1	MSARVFLAYAHSYPKALADNAWDNTGLLLEAPFVPSRRQSNTVLLTIDLTRAVADEAIALNSSIVIAYHPIIFRGLKSLTLANSQQQTLLRLASHGISVYSPHTAVDAAPGGLGDWLADIVTGTKTSYDASPSAAVTPALQTEGSHDSFVQKGAATLSVQRPTFQLQHHPSQTTLRLSKDPPKTTSIPHTRRPVVPQSPEIKTHPGAGMGRIVEFHDAQALPTLLDRIGKGLNNPKGFPIAIPQDATIADIKIRSVGICAGSGGSLLANLDVDLLFTGEMSHHEALAAIEKGQVVISLFHSNSERGFLAEVLREQLEDTIEGEWQAVRDEDKGDESLEEALADDGFEVAVSQVDRDPYGIVVLKGDAEEDS
g294.t1	MGASQKTAMDPRHKLSKSLDQLFVDPANPTIMSARTDDEAARNAASSGVTPEALKQKLKSSLGATHVEIEDMSGGCGQMFEAIIVSPQFTKKTTLARHRLVNAALKEEIAAIHAWTPKCHTPEEWEKKKPQ
g295.t1	MPWYHVAEPNSYLVVTGVGIEKVKIQKKAFVYPFQKVSKISITPFDFSMSLQAMTLEKLNFSLPAVFTIGPADDMLSLEKYAVLLTGESDGRPTANANKGVVAVAGSEGRSHVQDIVKGIIEGETRGIVSTMTMEELFRERKVFKDKVIQSVQSELDQFGLCIYNANVKELQDTPGSEYFAFLSRKAHEGALNQAKVDVADARMKGEVGEAEKQGKTKQEVAKIHAATAVLETERKAEKATADAKLTNIEIEIGNKLNIARINAKREAEQRDAELNTEVEKAKGYMELEHLRATKVVQARIEKESSQQKADAELYAQQRGAEGLKFSEQADAEAAAYRRLQDAEADFKAKEREAEASFFAETRKAEADYFRREREAQAHLITQQREAEGLSAMAKAYGE…
g296.t1	MSQNEKNERPPSYSEVPNFSRPNAHRGQQILDQLTLTRAHHIQAVIDTHIIPLVEQRASYGIAQTTIAMLPSDIPLPAVREKSEFSFDTDTSKAVEVIGFASEEEPNIVRLEGQMNRTEFWRVQAVIVELERVLRDSLNASPQLRSPLRERSEFETPQKQKRNFLAKFVGKGEEERSPSGNPEVGVKKMDESGLVLVKARLEEISLRTLSDFGLYDTMSKQCVIIRIDARC
g297.t1	MPSVESTPVSRAGITTSATGERHIPSSVRPDGSVRKEIRVRPGYRPPEDVELYKNRTAEGFRNRGKAGVPGAEALKKEEDPAKTGNAANKNAKRREARKKAAADKDEETPAAPAKSAEPVEPVEPAKPVDPEAEKEKEAKKLVKKLRQARELKDKKEKGEGLLPEQFEKVIKINELVRQLEKLGFDAQGEKKPAET
g298.t1	MAGVSQLENPWGHAPANPTVIRSNVTLLGTVFAAAFGMQLAFDTGSERIWDNINRGRQWKDIKQRYIEAAEDDE
g299.t1	MQEAERRKQNAGSRTQEAERRKQNAGSRTQEAERRKQNAGSRTQEAERRKQNAGSRTQEAERRKQNAGSRTQEAERRTWLQNQHRLVVGADVICLSLYKVLRQAGCSYRGRGDFLMHGCYDIALELSPACSPACLPDNATVLRPTPDSTSPKLWQDHDLTNSNCLLLTRITVSLTRTSTASPTTPPPPPPPPPPSTLHPLEFGCAMYISPLEQELCRNLRELPRRHNYRFTPEADRDLRAILFRSLAGHNAHLPLFFPSGLPTDREQPWSLRDAQGAVEGAEYTAAAKGKPCGHIFKNGEATYRCKTCTDDDTCVLCARCFDASDHDGHHVMVSVSPGNSGCCDCGDDEAWKRPVHCNIHSVDAESSNKAAGKAKEGPSLPDELLESMRTTIARALDYL…
g300.t1	MSACSSTLRALSRSRIPTTKTLLPFLYQTATIQQWKPAAQPIARRNISRYSRPDDAAAVEDIPFEDKDDLPPALDDLEPARKTTITGSERAAFEKLYRKFNARGSRQDEKDHEVEIDAIADEYWEPDDEDNPANLDKIFDEALKGNPNLAREWNRSSTEQLKSRKPRQDLQTMAQHILRGTRPPEMKRAEMRAVRKKDVSAKAAKLNEARVRERTRVDDLLKSAKTDRDLWDVLHREVFDLIRQLDLDGTNKPTPRKSRTPKSTNTTTDPKILFANYPHHLLTALTTLRTHFPASPLPLSILPTMKSLGRSSYALGATTALYTQLLRTAWLQQSSYPLLVSLLTDMHNGAIEFSVDTLHLLDQVIKEFDMARSGRLGREMQMVYGMDQFGEGIREVRRW…
g301.t1	MSSFQAVNTTLTVPEPPPARSGEETTPTTPRPDPRFHKDSKRGDETRAEDPSLKTPTRNSFIGIAGQRPLPSSPFTPSRELSETPSTKSNLSRGQSYTSTQSVDAAEDVQMGDGDEDDDKDASDNESATSESGRPSKKKKGQRFFCTEFPPCNLSFTRSEHLARHIRKHTGERPFQCHCSRRFSRLDNLRQHAQTVHVNEDIPAESLAATGTRFQRQIRTDRVRPPGPRSRANTLGSMGGHSRGHSRNLSTSSITSTISAMSVAQSPDSRRRPPPLAMASDDSARARLSLQTMEAYNPPLMGSPGPQIVEYDSQSNAPTTPTSATYSTVAGSPAHFGSAIQSPASTSSRPVSWAGPPPGRRLSNSNPFSGPPGQVPPPYMSPLQSSAASTFSTQSSVYG…
g302.t1	MADRKKRDRYAGAAYEFGANAGLNAGGAAPPPQPAIPGYGATAPGYGAPAPGYGAAPVQGYGQPVPGYQAAPSYGQPAAQDPNALSQQFGQMGLGPQQGQAVPQQQQQQQQQATAASQNQLFPSDLIAQPFHVSELYNPPPPINLPANAAATPSEFANESSKYLRCTLNTIPTNHSLLKKSKLPFALVISPYASLHDSEDPVPVVHDQVISRCRRCRAYINPFVSFLDHGHRWRCNMCNLTNDVPQAFDWDAAQQKSVDRWQRPELNYAVTEFVAPQEYMVRPPQPLCYYILLDCTQASVNSGLLAVVSRVIKEALERIPNADGRTRIGFMAVDSSLHFFSIPPDGSENNDTHQLVVSDLDEPYLPMPTDLLVSLSQCRNNIENFLDRLPAMFQNTHIP…
g303.t1	MASLRGTQQPELSKKLYKIIKTENHVIGAHEVAARERVGVARQLSEWGEATEDETISEVSDKLGVLMAEIAEQEDLYAQALEDYRGVLKQIRNTESSVQPSRDHKAKISDEIAKLKYKEPQSTKIVQLEQELVRAEAQSLVAEAQLTNITRQKFKEAYDHHFAATIERAEKQIILAKHARRLLNLVDDTPVVPGDLHPPFAGTEEARQVLNDAEDDLRNYELHVEPIHSNSGNLGVGAMPGAPIGGAGTTLAQDTTQYQDDVGTVEDGRHAESSVQGTDAGSQPPYPVSEAERLEQRQATEMTSQPQPTAFQHVA
g304.t1	MVKSGLIAAFAAYAHVTQAACPFMDNDARDVPASHPQVKRADGSYDVPSNTNEFMSRFEVNDTGVYMTSNSGTPIEDQESLSAGERGPTLLEDFIFREKIMHFDHERVPERAVHARGAGAHGVFTSYGDWSNITGASFLSTPDKETPVFIRFSTVAGSRGSADTVRDVHGFAVRFYTDEGNFDVVGNNIPVFFIQDAIKFPDLIHAVKPRPDNEIPQAATAHDSAWDFFSQQPSSLHTLFWAMSGHGTIRSFRHTDGWGVHTFRFVTDEGKTKLVKFRFRTLQGKASLLWEEAQVTAGMNADFNRQDLFDSIENGLFPEWVFEAQIMEEDDQLRWGFDLLDPTKIVPEDIVPFTPLGKLTLNRNPRNYFAETEQIMYQVGHVVRGIDFTEDPLLQGRLF…
g305.t1	MATIKQHHSLLHRHHSERSKEHVGPGPNVFDGTDAVTAHKKVAVSRVVEAYDALRAENRSSSPTAEQSTPEDPFAFESLVVSLPNGEVRTFKYLLRKWDSNQHPDPEFEEAVTSWRPQFEEAATKHFFRRIALWNESEEIMLAAKQQKAMELKNGRRRDRAISMSKMWSRERGRALDNEGSVRDELKQVATREGLAQLLWTLLNDQTQPLCPELFEVCKEAVKAKYSIHTIGGTQ
g306.t1	MPFLTISNKKIHYADLKPEGKDVLETFIFMHGLGSSQNYYHAVAERLRANGFRCIIFDNTGAGRSPYTGTGSSIQSLGDDVIGILDALEVPKAVVVGHSMGGIVVAHLAAERSDRVVAAILIGPVYPNEGAVPVFEKRIEAVQKDGMQPMADTVPQAAVGSKASPLASAFIRELLLGQDPAGYCSNCRVIINAKPPSYSKISIPILILAGEEDKSAPLEGCKKMFEEMGTSEKRLEVMKGVGHWHCLEAFEEVAKLIEGFYHEIQ
g307.t1	MNRTDSGFVESLLSQPSNGQTTPLHRSNTAPHRRRTAKAAPSSVETSDVINMSTHRPASEKRPRPSNHRSASSSENSTARSRSKGRGHDSKLSSRRTSFTIVDPSRPARHYRVKSSQPLSPASQDVDDVLALHFRSCSLFSNPSYQTNSALPSPTLSHQDNFGFSNAAPRFSMDEMAMVEEHASPQETESACVQIPTTTTHWISPNTRKRDYERIDRANTGLRGLVRRVVPRCVSGPPERFYEKDQSDAGSVRRYRLDVIESRINEKDIIRLPAHASERPKLKSRWTCF
g308.t1	MSEQLTTKQVAEHNTVEKGLYIIVDQDVYKLDSFVEEHPGGAKILKRVGGKDASKQFWKYHNESVLKKYGPKLKVGTVKEEAKL
g309.t1	MSELKITLIGTGTIGLSFAAFHLAHLASSSQLTIYDTRPDASQYVQNNLPRFFNHQDPSSLPSFSDVKIATSLQDAVKGANIVQESGPENLPFKLDLWSEVEKHAPNDALLWSSTSGIPASQQSGKMQNKSRLLVVHPYNPPHIMPLLELVPSPETSDEVIERTQEFWRAQGRVPIHIKKETTGFVANRLAFALLREAVHLVDQGVVSVEEIDSIVTNSMGPRWAVAGPFKSYHAGGGPTGLEGFFKNIGGTVQECWADAGTPNVGDGWEEKVFRQAKEVYGTVNVGERDRITRRILQVLEEEKKDAGNARSD
g310.t1	MVIFKSRQPPIDLPAHLTDWDWLFDSSYSPLSKFPPNELAGFQNAITKERVNWADVKKYSTFISTALVKKYGLKTGETVSLFGQNTVWYPVAMFAGLRVGAKISGASPAYNVEEMTFALKTADSKFLLTTPGSMEVASASAKAAGLPQSNIFLLEGELPGYTTVQELIRIGQSYGEDGQSPTFKIPPGKKNKDVCGFLSFSSGTTGLPKAVMISHQNVIAQCLQIQQITPETQKKIMAVLPLFHITGLVHQMHLPILLNAEVIMLPQFTMEGMLNTIVEYKLGELLLVPPILIRLVRDPIVDKYDLSHITRFSSGAAPLSEEVIQLLRKKFPSTGFKQGYGMTESCSCITAHPPEKFDYKYAHSGGAIVASTEVKIIKPDGTEAGFNEDGEVLARGPQI…
g311.t1	MSDEKQPSANLIRMWRVWRTTKEMMNDRGYQVLEDDMNMPLDEFASKYGRADGEPDRSRLNFSCQPGEEMLLKYTMPPTKKDPEPRPQIGTIWVEFNSDENVGLKQLRDYMQHLVNGAFYSGIMVTVKPMTGMAIRLLRGSASLSEGPKGGVEVFVEQDLLVNITKHELVPKHVLLSEEEKQQLLKRYRLKATQLPRIQSTDPVAKFLGLKRGSVVKIIRKSETAGRYASYRWVI
g312.t1	MTSSNHIPNLRTLLGPGRGGGLRGRGRGGGGPGSSSDEARDNAVKGTDQDAAGSRLSCVELGYLHDPYARLFAVQPSTRRLPLLNRGSYVRTTAIDMLVAKFLLTHPSAPKQIVSLGAGTDTRFFRLLDAYPDSRLIYHEIDFPTNTLPKIACIQRQPVLHRRLLQIPNTSTSYHSATYNIHALDLRSLAAPSDDAPLPDLPNLDPTLPTLILSEMCLVYLQPSTAQSIISTFTTHYLQPTTPAALVLYEPILPQDAFGRTMISNLQTRNIHLPNLTSYPELGDQRARLTGYGFREGAKAADTNFIWKHWVSEEEKERVASLEMLDELEELELLLKHYCFAWGWRDGQSDVFSKAWADMLEQT
g313.t1	MAFGKANQPSFNLFTGVEESPPPEPLRQTFRTTMRASTMTNAPHTVVPDNPVNEDLRAQLNTLRYELETAKQEKAMLKLELDQEIRDAQSRAEADFRKAQQAEATNSQTAKKYEALSKELSEVQTRAANERQDLERRLRQSQEKAQSLQEDYDEVKDDLATSQRQNEHKYNNLQTEHQRLKDSVEDVQTDLVSKVNALQAAQKKLGEREEEVGQLEAEVLRLKAISGDAETLTIIKRELSDQVAHIQKLEALTREQNAELRNFRKQHKAIEVVEEEKRSLQTKLRMMDDLQRQLGEAEMRRQVLEEERDSWTSYLESEGNEDSELQFETPEDLARAFIQERIDKTDLLNKLGEIKPELTVKEANVQALEDEKAKLQAEIQQLKSSATTNIAPNAKEAQA…
g314.t1	MLIRTLTSLPTFTAVAGALPYSFVLDVDSIDGAAIDGPPSAPLLLTTTEAFGSPTTALSPFPTSIVSMLAYAPVRPAIVTTTGVGNTTLTTCLPTTVITITLPNPTPRPTTGSERSDDRDTSSNDENSLTDNDSDDAATPFDTSTPEPLSAWPHWFTAATFTLVFYDAITLGLFVWLWVFGYLWWFGRGRETRMGGWVRRGAVSESMEMAPTLDRHGRYERTSEWVGSGRSRYGRARSRSWERARSLREAELESEMRRLGMI
g315.t1	MASLRSVCRVPLSQLARRTAATNHPRLLQRQWRGYATSLEAQQKVLSQDLEDADPTVYKIIEQEKKRQKHFINLIPSENFTSQAVLDALGSVMQNKYSEGYPGQRYYGGNEFIDQAERLCQERALKAFNLSPEEWGVNVQPLSGSPANLYAYSAVMNVHDRILALDLPHGGHLSHGYQIPGKKISAISKYFETLPYRLNEKTGIIDYEKMAELAHLYRPKVIVAGTSAYSRLIEYERMRKLADEVGAYLLSDMAHISGLVAAGVIPSPFPHSDIVTTTTHKSLRGPRGAMIFFRKGTRRVDKKGNKELYDLEGPINSSVFPGHQGGPHNHTITALAVALQQAQSKEFKEYQQQVLDNAQAFAKRLGDAKENGGLGYNVVSGGTDNHLVLIDLKDRGVDG…
g316.t1	MADIAFSKIDDSFTDSYKLQALFDADQLDQCIKDATALLDDPAMPRYHQECCVGAKTYWRIERARYNKGQSEVVDKALCELRTILDDLQNALAEEWKVVHKADVPCDPEKKLEKADEDVMEQEVAIRGRWEPPKVELNSPDNKA
g317.t1	MALSTPKKSISAPMPLLARQESSPELGSPSKVTQYNKQTGRPVRRSAGKMKPVAGYVDSSILEEEDFIPCTSGDDSEEEDDETSATPRGRADKTKRKRKRSPSPPSPRLDPIIYSQQLDELTDDETGGAFHRRIPKKPPLTLRFNVPLGYHGPLLIKLDPAMLRLDDETASKKMHQSKKCRADAPVAHAKLSERPKGFTDLPPELRNKVYRYAFVRDKSFQIPACKPWGSANLCQSAQFLGTCKLVHNEGCSVLYGENTFAFERHESTRGTFYEHEPREIGYQDALQFFKMIGPENLQYLRDLKIAFNDARPSDTPRAHSNEDRRYMTDDVLINCLRILRHAKLRKLSLAFMGRRHLHRSDVKFLGYLEQIKTDELEKWSQPRGYHPEQKIRHTVWFEL…
g318.t1	MVEQQSQNAGPVSADLPPAMAEIKSHSVDQVMAEMNRMPLFMTTLDETDGEGGENMMLEALKAIAYEGTRYEIAENFRQQGNECARAKQWTDAKEFYDKAIAALKGPQSKPDPEADAEGGKVIEVQVDEEEEANKEKVVEEACYVNRALCNLEKKNYRSCINDCASTLRLNPSNVKACYRSATACLALDKLTEAKDACEFGLRLDASNAPLVALATKIQKRADYVAAVEKARVAREEKAASERATLALALKARNIAVRTTTDEAPDLEDASIALANPLDPSSPLSFPVLLLYPAHSQSDFVKAFNEHQTLPEHLEYIFPLPWDEENEYTVDGVEAYMETAVGGLIKVGKKMALHKVLGSGKVVISDGLVRISLVPKGKSAAWIEEFKKRRGTAA
g319.t1	MATDYFSDHEAFISSQPLPSPADTPYMSSRRTSRYGTPASEIASSPPPLPPNPYPESEDDVNNEKISILDPRRFTPTLHANLVSEILNLRRELDSKHKFIEDVETNLHTARTENDSLVKQLSSTAKDGRAAKRQLQNYENEMLAALEEIAAERDKVKEANADLRTKLEAAEKRSRSQDDDSTRVHDMWTREKDVWAGEKRILERRVHISESRLKLLLDELAAHETARADANVESEGEDGKDGGAGAESDTASIHSSPQRRSSTHIGRHSRNLSNSSYRSIGRNYRLSLLSNEGHGRGNGLSLADELIFDEEEEEDLDELELDSDDFPEHEMRARRVLESRQSMYPDNKAKRILGLSNDVQQSNKDTSAIAEEHEHVKLSYETTQSAVTITPREITLIFP…
g320.t1	MPSKSPFPDVEIPDLDLWGLIFDSKDRDFSDGKVLYRAIHSNRKYTFADVKAHATAFGEGLCNLWDWQRNEVLALYAPNDIDVPPIIYGTFFAGGIVTPANPGYSADELAYQLENSGARALVTTKAFLKTALEATKKVGIPDDRVIILGAEKDDTHRVKHWTNIRKTSGALRYRRKKAKPEDLAFLAYSSGTTGLPKGVMLTHRNIVADLLQIKGSIGHWYSSKEDRFLGVLPFFHIYGLTGLVRQMLHRGIELVVMPAFDMETFLRTIQEHKITFIYVAPPVIVRLARDKMVDKYDLSSVKMITSGAAPLTKELVDSVHKRLKIRINQAYGLSETSPMTHTQPWDEWYTSVGSVGKMFPNMHAKYMSPDNTELGPGEVGELWLSGPNVFKGYWKNEAA…
g321.t1	MSSKTAPYEGTTSRAQAQQRAPLPEAEDVPIPTYAEANGYAPPPGPPPATASNVTPRTEVALPPAADELPGYDTIDPKNTTFLLYSTFIHTPNGPAYQLSSALNSNNSPLRIRRLQAAEIPLAHELPIRFDRSQTLYEIQDPPFRDNEYYMVGKKPHCHGGALQLTFGWKTWHIRHIAGPNSAPSEIMTCKKVASGGGLFGKGKAKDGVVVKDGLTEPFEWKDTNGRLLATEGLQLLAGGVVPTLHLSADLDSMWRELMISFWMARLWATFR
g322.t1	MAPSSPILERFRTLLRPRKSERSASKPDINMHEPPSSGLQPDPRSAGAVASQPSNAHLEYQAGGLTSIQSLPAESAAPSQTRRESQFSDLEILHTRLSNAHLLAHHQFELHPAGGVSYKPHVTGPARHGRQPSHSLLPHVQSEPLSSDPLTINIQKSVPVELTQAEKEIFRSLDVPSALCCISRGDEDLHQFFINFGPLNEGAANAVFSIQPGHHDNTASGFLFVAVRDLGNTATAIPSHMVADKVLRVSKGLPKSLRSEVIVDGFMADVRPLFVSPSASTATCQTLKEIDLDKHLMAHLPVVLLDKAMSALKELVPAIRLLSSTAQFGILLPNMSTVAGQNITFEIKPKWLAQSPAAPPDAIRCRTCALQFSRGKGVPNDYICPLRLSNESPACKDDI…
g323.t1	MPAPSPLPTYLYKILPSAPPSPLPDRLPLSDLDRQDGFIHLSTSEQVPGTADRFFGNFTELWLLRLKYSVLEAGTDGDGNVNADNKARIQWDEVGHGAFAHFYGGDMGKGNVQEAIKVEKKGTWAESLKLEW
g324.t1	MGGRGRVKRQQVEADDGWTVITHGLSNLTVGNTKGKGKGNGPRHNASQAGAMPAATVDGLTAEKLLLDFNHRTEKWEATACAQHLQDVLAKTEWDVREAVCIGIGSFSRDWEHRHRAMWQLVLFVSVVSHMRKSNVEVKLYAQEPAFTPLDRTFLSLLDVGVCTNDIESHITTHSFVFSPFVDWYILLPMFLKGKEPVLYVGNEILDDYGAFAQSEEKREKLEECNELGKKWLTKRDTVRLRDFEMHPHALNGMVVYWVKDGEGDGVEMEATGQKEAIENEASKTADRTHGKGAEKKPDQETDRKEDAEERSETDD
g325.t1	MASHNSGEFTHGDEKKGAVVHPRDGVQVPIYNDLETASSEDLSIGAILRGTAAKPLNTFEKKAALINVELDKFGLGRYQICIWFLCGFGYFLDLAWSQGVGLVSTAIYQEMNVADADTGTIFACANAGLALGALGFGLAVDIIGRKWAFNLTCLITSIFGLLLAAPKFNYGAICGIYLLASLGLGGNIPIDATIALEFLPQNRRYFVALLSMWQPIGVVAASAIALGTAAKWRCDPKLPSCRAVASGEPCCTVDSNMGWRYNLIILGVMTLVIFCLRYFVFHFHESPKFLLNRGREAEAIEVLHKIAKFNRAPPPTLTIEHLAAIDAMDGVVHQEAPTNLTRAEKNKRVVKGFGTEIARLKGIFTNKLSCLIFVLLGIAYMGDYWSFNLAGSFLPIILL…
g326.t1	MSDYGDDYSDDGEEWFYVEEEFMAADDLAEHAVASPPPTTYADEDAAEDWDRFDYFNDLEYASDGYDDAAFQTHSLKGAKTGEKRKRHVKPTGSKKRQRSLGDTEASALGMAPIVWRSQTDRGLQPKLLGDDAQTYTVLRDWRKKLRDTPLWARGPSPQSPPVQAAREPESIAEGTSTVEPASPPCEIDVEDEGAPEDETDIDPGALMAVLQSRLAEAGGPLSGMDPQQLLDFAMRMAAGKDAGDDIAGEMADAMLDHGEAGDEEDSAAEANLLSWVAQQRNSGTEPPASAPSSTTTIHSVRQPPTLPNEETGTRASSRTLKASQTVTKSRPQNTSALKRKTCDDDEVEASTKPSKKRATRTFDAPTAASQARTAPPKNTKGGRKK
g327.t1	MRALRKSSHLSRQLVAANGARFHSTTAPAAKALTSVLIANRGEIALRVGRTASEYGVRTTTLYTDPDARSQHALSSPFAVNLGDPSAYLDGDRIIQIAKEQGCQGIHPGYGFLSENPHFAKKCTEAGITFIGPPAQAIEAMGSKSESKNIMTKAGVPCVPGYHGAEQDPEHLKSEAAKIGYPVLLKAVKGGGGKGMRIVNTEQDFFDQLSSAKGEARNSFGDEVMLVEKYITTPRHIEVQVFADSHGNCVALGERDCSIQRRHQKILEESPAPHLPEDIRQDLWEKARQAALAVGYEGAGTVEFIFDNDTGEFFFMEMNTRLQVEHPVTEMVTGTDLVHWQLIVAEGGRLPLTQQEIEQRIKERGHAIEARIYAENPDMNFIPDSGLLLHLRTPIPTPT…
g328.t1	MRLHISPPSTTKTAKHHQRRTPDPPPEPHPEPHHPLSTHPPSPLPDATARQAKPALLEQNAPTHPVRAEAHPTTTLPPPHPPRERIGQGSAGTRARSKATGKKHGPVIFPDRGALNTTLVLRMTSSVHALVRSSRRRCGDCVGWVWLLGIEGVFLGSAWVGRD
g329.t1	MSLSHAPDRARKYKEAPAPVASQKMVSRLCFPASSSSHTLASPHPYDRPFCTRPGSGTGTALDRWSLSIARLPRPLLQPLHAASTRLRSPPQPVPASPSQPQPVPAWAPSAYMVCPPAPSPPLPRQAALVHGRAATQVPDPTPPVQPCRTSAGRLAALLPLRRLLSRTATQRNPCEALRPPLPPLHHPHSAQGLPPPNHHPHHPQHPHPRPAQVQQHHHQPHPSSPHQPQPNQSPAQGHYPSPHPSHAQGPPPHQSPYVQQLQGAPPPQQQQQQQQQQQQPQPQQQEVPYYQAHPSPYSTNSAPSNYSSSETPELMAAATMNRTGFPPISYHTPQSNSPASVQSPQHDQHGRPIYGQPPSQMPQSMYYTPYGSAPVPQQSPYNQHPSSTPQQPMASNPL…
g330.t1	MASAPALALALAMLRGHVAETQAPSQAPSQAPSQAPSQAPSQAPSQACINAMGPSLRSLPPPFIPLRLPLHAGTPAQHPAHQPRPKDCLSARDAISLLRQRRKLDQNLPSPCDCLASCGFSCNWPGWPRLVHVANLSACRIA
g331.t1	MSRRTTCSVPTFPSSPRQQTLLPARFATTEPEARLHTTPPNSSEELAHTWPIQDVRMSGCQDRRMSGCQDRKTAAFQRSAPKPSPAQPSPVQSSPGLLFSQPHVSLATLPSIDTATRCDARGLPAAAVYALDDYSRRAA
g332.t1	MSTSSFPPPELREILKEVATLLKDRKETVSVAETAAGGLISASLLSFPGASGFYKGGLTLYTLEARKAFVGWTDADTQNYKGPTPDIVTKLADNTRKVLGSTYTVSESGTAGPTGGNTRNRTPGYVALAVSKETGTVTREVETGSQDREANMVRFAVEGLKLVRDVIRRSVGASAGEGTKDERANTGADVQEEENVKLVPGDQGESGEVAVGALAS
g333.t1	MTRPDTSLNRHGSIESSWSSRSGDTVRPYGRQGSLRGTPVTVKTTKDPNAPVEKEPDISPTTIPPAPPPKDPQHQPRKPPVWEGPISHDFRDYRKDLAVLQTSGGRVPSISRNPPTASSANSNPPWASSAPNGGTNMANNVWSSFFNDSDNDDVAQLSPGFAPSGGNAREDAMGFPRDDRRPSVASAMTVSSTGSKSSFSRGFHKKLQNVFGEDFPGEGRQNSDTSLNNARSNITETQSLHAPRNRGNSLNNTFGSGAYSSRPTSPTSSRPRTPQPSSEVTPWEFQDSQDAASSTENGRRRSSEQTLTKPGHRAHKITSRLPGHRHHRSKEENKTAPDSRGDISATYPLRPATSREDSTYSVRRVQQQQPSALSSAFASKTSLAPRPPSPTPSTYSEMT…
g334.t1	MCTWGGAGQGQDQAGGRAGGGSGAEEAPGSAGGAGGAGGAGGAGGAGGAGSAGGAWRQRSQTAAGSCRRGRAAHSASSSTAAGLRMPTHLPVSSPNAPLAPGDLSSTHRHPRSSPACNTARKCASTVSGAPSWPHTRARHVAGSDSPEAAEQQLSAV
g335.t1	MSDSQEPPAKRARLEADAPFTGVSSLDAPGSPVDDLDDDFYDTTPVKPAALSSAPHDGPSASLTATAPAPSSFSLPGLGSLGDTAVTQPAAEIDADVVMGTAAHDEGELKAEEAFYHDASAVEPPVANQLQALDEAPQHGKPLRPELHAASLTPAQDAAETTSTTAPVLDDGKIPKESAPAVNAPVEQEPSVVAAPATEASEPTADESKAEFLRIGEQNKDNKEAEWQLDSDASDSSSDSSSSDDSSDNDADDGELMDPEEMVRLLMAESADDAGATGKAKVKTLNELDEQYEKPDITVTNETQITELGKVEAVVDNLVLVRAKISGDYQVLESGSALCLQNFTIIGKISEQIGRVEEPRYSIGFNDPAEITALGIAKDTPIYYVDAHSTFVFTEPLRK…
g336.t1	MPPPPPPPPPRQGVPIAPRPPVQAQKPPHELEPIIAFYIFAAANVVAAFFAPIQDCDEVFNYWEPTHYLNHGYGLQTWEYSPEYAIRSWTYTGIHSLVIKLGMMPLRFLGFARSKTAEFYFLRTFLAVVCALCQTRLYSVVAKTFNPRVALFFIFVMVFSPGMYHAAPAYLPSSFAMYMTMLGFSAFMDWTGGIRTAQGIMWFGIGAILGWPFAGALVLPFVAEEVFLVSLTGEVVECITRLADGFVRSLLVLALQMALETFFYKAITCVPWNIVMYNVFSSGSRGPDIYGVEPWHFYIRNLALNFNIWFFLALGALPLVLIQHLLLQNSVSKQTLLRSIVFVSPFYLWLSIFTFQPHKEERFMYPAYPALALNAAIALHILLANLGSTDPSRWVSKVP…
g337.t1	MSISSVQRRRHIDELVDEVKRIGQATLDAAWRDFKIRPKLILYVGIATMIVLWLAATSLNRLRFRKRLSTTTPSTPRLEKRLPLRAVDRAPGVWTPSLFRRPTAKPYPSWSVHTTKPLPYRPFRYGPRYNITMGLRTMEWDEWIELDNGYLKYHSTKASRIAARGEKCCKTAPEAWDAAVELLEELCGYLPERYPTLFEPLQGGGKGVKNAETGEVFDIASCLADEDPMQTCARLVQDDLAIMIERPDGQYYLLAGAILLAGFWRLQDKFGMPLSEIHTSGDVPQYKEKLEKGMLNMFKRLQPEKPVLRNNYFIQVDDNLAWSESLGSEDEEGINWASADTTEGVGNIYFRSERQSLRRLPKSGGIVFTIRTYFHPVTEICKEPYVPGRLASAIRSWGD…
g338.t1	MRLPQRFKRVPNQEPGEEQDIILPAYPSQTKMDVNNNVETYHSSSWEPMRTDTEYTAGAYTTVGLPITHHKTWVEHLEEYEHRRFGTGILSFLYNNFVAGWRAGLLRAFLFSLAALALNISIFLWLFLEYGPVRGNGTINTSNCDEVGNLETGIKVGLNVVSTLILGASTYAMQGTTAPTREEVDSAHSKGKWLEIGTQSWRNLIYVSKRHASIWSILAITSLPLHLVFNAVFFTTTETYQYAVAVVDQGFLQNAEFQATSENSSPTLPQFERFVWNGNCDGNDCSWDINNDGLVRQLLDDVRDSSRAQAYKRLERPECIESYTEGFMQKYSDVVVVSNITQVDTPVLWTRYSQRNLSKDKKDTNQDPFHWVCHDMLKNSVEGPDRCSRGFAKKHIKPE…
g339.t1	MDTDCTIPAPLPVEANKLSGALPKAPFAKVEHSSSPPPLIEDTSDILEDGEIHEQQETVSSLRSELQLSTLEYSALNDRFKRLERQHSDMQDLASAYSEVIRGFSPTEIQNVSIDQLQAEAGHDGLRAKALEADVLRPLIREAGGLQALISQMHATKTLIDKAGGLRELEKFVSDLRTIRDTLDELKGSQGLGGLVSEVRALLAHKQQHVELKSRVDGPNGLRTKAARYEKLIQAVTDVQNDTQPWKQNPTASTVSSVRASSSSTQPARSQQSPAGPAAMNPARARLISATPLEADPDRDLYEPVPPVAEPLNKTGSNNTPLGVSQVQPVASSSTLKRKGVENTAPSVWKRARVDLDRASALVQASLSPSTDKQLGRGSAQSNTAAGTAGPKTRAQPSR…
g340.t1	MTRHKHRRATAPEHLGSAPPSAVRRPPPAARRRPLDSDSEPSGVAAPSLSSRAMAEPSSAGPASSASTELQYAQYDGAKEEHGGICVSWCVYLYLCVYLYLCVYLYLCVYLYLYLYLYLYLYLYLYLYLYLYLYLYLYLYLYLYLYLYLYLYLYLYLYLYLYLYLYLYLYLYLYLYLPPRPCTSSYPPRHTDSLVAHYHKLTSQALDKDQHLIGVIISKLEPHRSGTYRGYIAMLAVQESHRGRGIASQLVTNAMDAMAARDADEIVLETEITNTASLKLYERLGFLRSKKLHRYYLNGNAAYRLILYLKEGTALKRPEAAHGHDMPLGMPIDDAAIS
g341.t1	MRAGGLGGFSRTSASPSPSTTISCAPRRTGELAVMSFFRRRFGGGDTKAPTPTPPPERSSPSTPERPSNLRVITAEQLHTLQQAGKGKGKHGKRKNAWVFGLGGLFGLVIAAFFAGSNDLIDLKSIEGMNLESLMEALPANFVRSAQQLQKQERDAVNYDSFAIGMHAREQGIRAAHPVIMIPGVISTGLESWSTEEGARQYFRKRLWGSWTMMRALVLDKAGWKKHIMLDKDTGLDPPGVKLRAAQGFDAADFFITGYWIWNKILENLATIGYDPSNAFTAAFDWRMTYMNYEVRDQYFTRLKSHIEVANHVSNKKAVLLSHSMGSQVLYYFLHWVEAEGYGNGGSDWVDKHIDSWINISGCMLGALKDLPAVLSGEMKDTAQLNAFAVYGLERFLSR…
g342.t1	MASYTTTRTSSSSSNSSSSTFSSPTLSPTPTYSSPTPHDPTARRLSLTIQNQHIPCTEREAQLLSLLGFAPSDPKTGLRARCMAGLG
g343.t1	MASNTTHTVTTVALDRNRTQPATSPPKRRRTSWRTQHPDPPALATCIDPHSALMQGHDHEHASERSRHLLGDKAEETEHAQASKSRKIEKMITPYLAHHIPHQYNPLGSADAPAGHANTKYCYRHRPDLLCRRQADEPSMEQLQQDIGRESQADQQSIANVWSLFSAAPSRHRNLMLQGILAQCCFPQLSFVSSAVRNLIKIDFIGALPHELGFKILSYLDTTSLCKAAQVSRKWRQLADDDVVWHKMCEQHIDRKCTKCGWGLPLLDRARLRHEKRRIQLRASGRGINEWSPNITPTPDTSAPPTTLVHRPSDASDSATGSKRSAPEDPSSPESSSKRSCTGVAIKGEARDQLASYFDQPKKRPWKDVYKDRFKVGTNWKYGRCSVNILKGHTNGIMS…
g344.t1	MASPRSPASSASSAGSRQSLDPGRHRPQTLEDLVNHFVAAKRALNSQTVLWRANDIVTTARELLEENAILAAKNASIRSLVEQQVDTLEAVRRGVDVVEAEVQVEFKQLLHHVDTSFSGLNSTLAVLRETPIEAALQPPATPQKHLYDFIDSATVSNLEATLRACIDRYNDALATLGDTNDAFDTSLDNLHSSIENVPMTPATTSNPSPIPTLYHALEGHAKEAARAFQGLVQHYDLCVTALQHTEGGSAAATQATGDAPSQSADDFAAPPEPMGEEERQEMLAVLQNDAQEVDEVVSEIRERGAEMTFLLNQIENHINHLRSEASALSSILQMIAHVTADVRSHLLTSRSFHASWLHDTRPTLLNGIEEWENQREFYERFDLAYAELLVEVSSRRRRH…
g345.t1	MFCFRRFVPIWTVVVVVTFLFFVTHMRPGHQHMDQEEAIYYRSIDTLFRSEKDALLQWTRSTKQPLKVETDHWLDWKPTSK
g346.t1	MPASKHPVKINVDLGEGYGNFKCGPDELLLPLIDHANVACGFHAGDPLIMQQTVRECKKHNIAVGAHPGLPDVQGFGRREIKMSPEELTAMTRYQVGALKAFLDAEGMPLHHVKPHGALYGMMCRDKDVCRAVYEGVPKGTVVFGLAGTLQEEVAKELGLPFVAELYGDVKYSKDGTLVIDRKKKSWEREEAQSHIRSQVENGTVTAVTGEEVQLPLGDHPVSLCCHSDSPGAVEIVTAARQIIDDFNKKNFPQS
g347.t1	MDKLQTVLIANRGEIAVRICRTAKKLGVKTIAIYSEADAASQHVRDADEAVLLPGSNATAYTDEDAILKIAKEKSADAVIPGYGFLSENAPFARRVSDAGLVWVGPSPEAIESFGVKHTARDLAAKADVPIVPGTKGLVEDEEEAAKEAERISFPVMLKATGGGGGMGLITCDNVKEMREGFKMVQSRGQTLFKNPGVFIEKYFPASHHIEVQVFGNGLGQAIHFGERECSIQRRHQKVIEECPSPFVERHPELRQKLGAAAVRLSESIKYGSAGTVEYLMDDQTGDFFFLEMNTRLQVEHGITELCYNVDLVELMLRQADAQLTGKGGLDGSELKQMQPSKPSGAAIEARVYAENPLRDYAPSPGLLQKVEWKDVPGSRVDTWVFTGSRITPNYDPLI…
g348.t1	MSSRQKRQSKPKAPATPTTPTTPKETGERSQYLPASTVLKNVARAVALLFVAGVASPVSQLNLTPVFGSIPASLHHQQAMTFSALAGLGVRRLLKGYVSVDVSAWVTVLAYWTPLIQCFLFPRSTQLGIDYGPLIVESLTYFPLLFLSMYAVSDLLDTVDFSRWDLPSALGDAILPMTSYVGVSFVSRFFGALLPAFIGQHVYLTRIGFQMLLASAAAFVTPSKLLVLAFPAILHTLWMNPHHPSDQAFQKANATLVATQNYTILARQESLTGYVSVVENYADNAFRLMRCDHSLLGGEWLVTPDSYKKGQRQKESIFAVFVLLEAVRLIEDPELTPIKSVPRALDIKPVPESEKAALVIGLGIGTAPNALIAHGLNTTIVELDPVVHRYATEYFDLSP…
g349.t1	MAPLALRPATAQDPADSKILPMDADDAAMNVDEIFSRDQRRHQQEEKRKKLNAKNRRKRYLEVHPEYFDDSSLELADPLLYDRLIRRFQTAREREAEGQRKGFSGQMSTDLWRAEAKKDALKHTDPNSLFTYSRGPQGQIVEEDKDEVPMTKEEGKAWWIDEMTQRFLNGADDDFEYKTVDENDTYDDEKERDIQDAYFDSMESDFDSDGEGKEKILTGETGIQDY
g350.t1	MSEKPPQERNSREPDDSPARKELASHSTSSRGGKSRAEEIARINKLATAPGVTAESFAHLDEKKILRKMDLHLIPMLALLYLLSFLDRANIGNAKIEGLVDTLGMSGMQYNLCLTVFFFTYAAFEIPSNLLLKRLRPSIWLPTIMVAWGIVMTLMGIVQNYHSLLIARIFLGATEAGLFPGVAYYITMWYCHHEAQFRQALFFSAASVAGAFSGLLAFGIAHMDGVGNLEGWRWIFILEGILTVIVAILAYFTLYDFPETASFLTEEERTFVVYRLKYQGASNETVNGVRVAEDDSFQWKFVKSAFLDWQIWTSVCIYWGTSTIDIIILELTKLGISCPLYGISLFLPSIIRGLGYTSSTAQLLTVPIYIAASVLAIAVAWCSDRVGKRYPFILVCLCI…
g351.t1	MCSSNSKNYSASSPAVNYNQPADTWYCNECGELNMNWYDVCPVCDRGVRQNAAFQSYAASHTACGSAGSPAPGSWVCSNCGAANSANTPDFCPICGYR
g352.t1	MVFGLGGSQEPTLDQVHDQQTRRPSAVEVVNEDVRRKSVDNRIVTGASQLTTRQSIVPVALVTLLFFLWGFAYGLLDVLNSRFQVALDISQGESSGLQAAYFGAYFIGPLTYSGWFLRKFGYRYTFMLGLGIYCVGALMFWPSAVKRSFGGFCGSMFIVGSGLSTLETSANPYIAVCGPPKWAEFRLELSQSFQAVGSVVAPVLASFVIFKNVGEDGRSLQSVQWVYLGIAVFVGILAGVFYFAPIPEITDSDMADQAEMMTSTTGYVDKPLRKQYTLFWGVAAQFCYVGAQVGIASFFINFFTQAHPNLNITDAHHQGANYYAIAQALFAVGRFSAAGFMYFGVKPRMVLLVYQTLIMVFLAAAIGVNTGSVTAPNWGGLALLMVVLFFESCIFPIIF…
g353.t1	MSYYQGNGQNYYNPSIPHSTQGSQQPYQGPYEQHNGEQENGGAGGYEYTIPVRRNSSANRNDELFIGTNAASPAMSQGPTSPTAGSYGSNYGYQSPQQQYNPQNYNAPAVALPNPQHYGGVNRAFAAPASSHQPYIPAAYADSGLNRNSSVSHPYGFSPTSPTATYPSPTAYQNSQFGRTASLQGRSAYSPPAPPPLPVPPGSAQSPTDDWGSYPARTTSSAHSQSYYQSSHAPLPSLPTHDTGYNAQDRVARYNSTSSLHSNPLPPTPEVPPHASPQRTNTVSSRPLPDPPTESDSDEYFSPHNGPSYNQDQLFDDVMNMTTGSSPRIQVQQPNGAEHYDEMGRRIPGRNGDRTNGDRLAPYPVRDVYTSDESDVEAAAGLAALRMAEEQEQADEARR…
g354.t1	MAIFNRSSSSSDGASPHNSDPEKYGKSEYTTGTSSGPVLDSNGVAVHTDGNHLHRGLKSRHITMIAIGGAIGTGLIIGTGKALAQSGPGSILIAYTSVGFLVYIVMTALGEMAAWIPHSSGFAGYATRFCDPALGFALGWTYWCKYIITTPNQLTASALIIQEWVDPKRVNPGIFILIFLVLICAINYFGIKFFGELEFWLSSIKVLVIVGVILLSFILAVGGGPGPATGFKYYKNPGAFREYIGKGDAGRFYGFWSSLVNAVFAYLGTELIGVTVGEAQNPRKTIPRAIKLTFYRILFFYCLAVFFLGMLVPYNSKDLAFANSQKAKASASPFVVAIRIAGIKALPDILNACFLIFTFSASNSDLYIASRTIYGLAEEGHAPKIFKWTNKRGVPVPAL…
g355.t1	MNKVSTVTTSFYNWKAYSLVGTIPVTAYSFPTITPTPSFTKGLGCASPTPTAFVISSKIHNYEWRMAYMNPGGMNFSPGSFGGCAAACALEDCVAFNSGDAQNFRTMNRVESVTGPFSLSLSARRQSLLVCPPKFPLHPAPPPPPPPPPPRRHPYQFIGTAPLLTTTSTPTPSLSPPITANPYGANACSNPTPTSFTVSNTLYHYNFCMAYMAPGSVNFNPGILQACAAACKGDCIAFNYGDPHNCRTINRVYAITAPFYGWSAYQLIGATPLPTAV
g356.t1	MSKRNPDVEATEPDVSLSGNSSKLDINSAYHTGNATNQGHRGQGGRQASVAAKLRNPLAGLSAQQSSIKTPARPSIERLGSIAAVICTFMAVYSPGEGPVPFAYSAESFPLHLRDIGMSFATATCWGFNTILSLTWPALVKAFTPQGAFGWYTAWNFFGWIYCYFPSPRPRTSR
g357.t1	MQRRRAQQPSGRRRRTCLRTAGEARRRGRELARRGRQRAWVGTAGVVRRAVVALLPGCPAALSLLLLPLLGLGLGDADGVGALPGVRPSFAAADVSDWVSPSPLPRVAGHVRLGFWRALCRSLTSLPHPPHAALLTVHPYALSLPSTTVAKSSLRKEPEVSRRPPRQPFLPLIHGSFNVTPEELFDLFGKFGPVRQIRQGIANNTKGTAFVVYEDVMDAKSACDKLNGFNFQNRYLVVLYHQPDKMIKAANDLAERQENLEKLKQQHGID
g358.t1	MRRITSFKPQYRLPAARSATPPPPSYEPLSPTLPPAARRPADPAGPCRDDAPPHHPHGNGPPAPSAAAAEGSHALGHHGLPPATHAHPPPHDAALPRPQPPPSCSWPPGSPSDALAHAAVTTSQRASPQHVDHTRRASYASSPTALPRPLGERAPKHAYPRDPAYTHDERPPKRARSEFYSASSPTYVHQHSRPATSHNPGWSHNLEHMLDAGMRMYPHSGAAAPKQEHNPDKRLSDAQLLLDFFQVSAHTAQTPPSTAKRLSISQAAPPAYPAQYPPQHAPHHHHHHHPKHQQHSQHPQHQQHSQHPQHPPAPTSPHAVAPQPPFHHAQHPHPSSDIARVPEPPSLPTDATLPTPAVQAPSPPQDHSTAQPPPPMSNTASTEDTKPKKHQGWPKGKPR…
g359.t1	MREGSRNDAAPDCLAVATSSPELQHRRDSDIDINLTPAFPATIDCTQHRLPTQHLIDPQNTAVAAMDSLVAQYSRPIDADECQTEEQQLELYSGAPELSLKFALPPVAQQQSWLRAMTDDYSNPNCPIKIAHGTTTLAFRFKGGIIVATDSRATAGNWIASQTVKKVIEINSCLLGTMAGGAADCQYWLAYLGMQCRLHELRHKRRISVAAASKILANLVYSYKGMGLSMGTMCAGVTPQEGPALYYIDSDGTRLSGNLFCVGSGQTFAYGVLDAEYKYDLEDNDALELGRRSILAATHRDAYSGGYINLYHVKEDGWVKHGFNDTNPIFWETKLNKGEFSNVTSELV
g360.t1	MASPQESITTVNGRRCTRSRARTAATSAPISTPAAPPTAVAPTETTTSTVAEQKPQTKPTAASSPAPQVPPPPPPPPPPLAPPVSSSQAEQSAVVVPLPTSQAAVSSPLGTGKAVLISLATSSSPAVFEPSAPAPMVSTPSVSLQSDGPAIASSQVAAAPTPPPARILPTSSDNNETAVIEPLPSSSLTTSPVAQPIVTETAGVVVSTSVAAVPDVIQTDSSSQTPLPVTSIAELLPQTSSAAISNPTHGPVGVIAPEQGTHTGGDGHTGEDHSSYSDSNPNIGGIIGGVVGGFVALALLSALLFFCLRRRKSKEAGWNEKSEVLSGFLSKAKAVPAGFGVFFARFRNEKTGPLDNPYQRHQPRSSVGSVYSTTSNGRGRSISELQRQPASGGGFVRRM…
g361.t1	MFNFSGYPGHLLAGQHDTQKDRPPPSKPIPVTFPVLDPPEPSIGTPPASWSRANGTGITQHFLGLKKPSDVTKNTLAQLNVTFQSNRDFETLLSSLSNDALSHIPPASWLDAPDKQELPASEPTVTLLSNGRRVPDRKEFFVRARELFFKNEDAFSTLTRKSNGSQAPLRLAHFRKFWEGLDNMAYYWDNSIDDYRSPDPAAVDTIAETVSSPNSTAGAGEQETRAETKTDWVAKMQNSIGSPNGSEPRKKAKTEAVNDQTMAHSVHVNGFGGSLAAQTASMIPSRVLPARIAPSRFPSTINMEPREKPADTSNGSYRGYRIGNGSEMPDQYRIDCVRAFVEPIAWAFGVTLSQHRRPPVLLLEHVRFPVRMSSVAWRGPQDRMKARQGWMEGPVLGIQ…
g362.t1	MYTSIFLASLVSLISLISSVSAAKALNPNLNAMLKMAATNYDRHALLAKDSDWYYDYFNHTDYDNPTGSVITADAATFPALTGFGISFALLKLGPCSMLPPHFHQRAHNLVMGITGNTTSWMINENGVRTVRIDIVPFRVTIFPQGSLHVMQNNGCEPALLISALNSDDSGTLNALNGLMTVPSDMVQASFGDENLDTAQLGKGIPGVGTGAVRGSPECLKRCGIEHGKI
g363.t1	MLRKPTLFDLNLRLPKKKNQVRYVPQQTYVEVSPNSNVSQDETWPTCLNCQKNNKSCPGPPARHTFKDLGPSLVTNTKPVKATKSILSIPDPNQRYLTQVHENFTSNKSVYHKFKISPKGTSNQKGPTLQSASTSTASSNPFRVPFLRQPSPSQHHELSRAFVATINAGSIGLRMSIFGPFIQDVPARLGHNAALDAAVAVLINAHTSLMYKKTSNDVVSINLYLRAIKTLQGCLEDPREGMSTNTLCASVLLGLVEALAGPRKGNRYLAHVGGAGRLMELQGARRFLDPFAKDILRFNRGGIIVAACYERKPCFLAAPEWRDVAFDDSGLGFDEQLHTDLLRAFAQLPDILKDLKDLYQLRTPFSDTVRGTRNDSCIDPSLALNPDFDHSPPETCPSL…
g364.t1	MARKAAEASDSSLSPAPEDISAQLETKATVKAATNGKKRKAETTVKTTNNTKRSKRAPADEIKEEAVETPAKKKVTRAKKSKEPVLPLEERTMDSKLRIGAHVSVAGASMILRPSKTFSSSNLSSTANIPSANAFAMFMKNQRKWDNPDMDPEHAALFINGCQDHNIEVGDCCLPHGSYLVNLAHPDPERKKQAYDCFQNDLVRCEKLGIKLYNFHPGNANATTREEGIKLIAENLNRAHTDPATGSVITVLETMASLGNTIGGTFEDIAAIISHVEKKDRVGVCLDTCHVFAAGYDLRTPNTYAEVMKKFDEVIGLKYLMALHVNDSKAPLASYRDLHARIGTGYLGLRAFHNLVNDTRLHGLPMVLETPVDSVDGNGKKFEDKSIWAREIKMLEKLV…
g365.t1	MPKDKRKRASGAGDSTPYSKPSAKQAAAHSIFKMDKDLGQHILKNPGVASAIVQKAHLKQSDHVLEVGPGTGNLTVLILKAAKAVTAVEMDPRMAAELTKRVQGTAEGKRLKVMLGDVIKTELPRFDVCISNTPYQISSPLVFKLLSLPHPPRSCILMFQREFAMRLFAKPGEKLYSRLSVNVQMWSKVSHIMKVGRNNFNPPPLVESNVVRIEPKNPRPQIAYDEWDGLLRIAFVRKNRTLRAAFLGTTAVLELLTQNYRLFCAQNDIPLDDTPLAADEELSTTEPAETMDVDTNDDFKGFSDPDDPDDELPDFFKQLAAESRAQHEKGMHRKKKGRVSELVREKVRKVLEEETQLADKRPRLCEEGDFLRLLYAFNQEGIHFS
g366.t1	MPTVHLLDYVAGNVRSLVNAIEKVGYTVEWVKSPADVPAAHKLIIPGVGHFGHCLSQLEQAGYVEPIRTHIRSGKPFMGICVGLQALFEGSEEDPNVQGLGVIPSKLRKFNDADKSVPHIGWNSANTSRSGEATDESLFGLRPTSKYYYVHSYAAPYEEGKLEKDGWQVATARYGDEEFIGAVAKDNIMATQFHPEKSGAAGLRVLKAFLEGKRSQKLPETPSAAETKEGLTRRVIACLDVRTNDQGDLVVTKGDQYDVREKDGNAGVRNLGKPVDMAKKYYEQGADEVTFLNITSFRNCPVADTPMLEILRRTSETVFVPLTIGGGIRDTVDTDGSKISALDIATMYFKSGADKVSIGSDAVTAAEEYYARGKKLAGNTAIESISSAYGNQAVVISVD…
g367.t1	MTRKLKHHEQKLLRKVDFNTYKSDNDHRETLVMRRYAIQGRDDYRKYNQLCGSLRQLAHRIANLDPADPFRRKQENLLLEKLFDMGILGTGGGGRGKLSDIEHKVTVSAFARRRLPVVMARLRMSEHLTSAIKMIEQGHVRVGTTVITDPAYLVTRNMEDFVTWVDSSKIKRNIMKYRDKLDDFELEAL
g368.t1	MPPKAKKGQDKGKAGEEEREDPLQAVILADPFETRFSPFTLERPRCLLPLANTPLIEYTFEFLANAGVEEIFVYCGAHRRQVEEYINRSKWSAPSSPFSRLELIQSTSHSIGDAMRDLDSRNLLVGDFLLVYGDVVSNLPLEGALAAHRARRVKDKNAIMTMVLREAGTTHRTKARGTSPVFVIDPEKDRCLHFEQMPNRDQSHFLSIDPELLSDHQEIEIRQDLIDCGIDICTPDVLALWSDNFDFQAPRKGFLHSVLKDYELNGKTFHTHITSDHYAARVRNLHAYDSVSKDIVSRWAYPLCPDSNLVQGQSYRLGKGKIYKEEGVILARDCVINSKTVIGRGTSIGDGSVITNSIIGRHCQIGRNVKIDGAYLWDHASVGDGSVVHKSVIANEASI…
g369.t1	MDSNSAGGSGSSNSSDFVRKLYKMLENPSDESVVRWGNDGDSFVVLENEKFTKHILPKHFKHSNFASFVRQLNKYDFHKVRHNNEENGQSQYGPGAWEFKHPDFKMNNKDALDNIRRKAPAPRKPNQANSDDIGMPSQQMDMVSGQLMATQAQLHTLEQRYNELSIHHSMLLQEVIGLQKTVVNHEHVMQNVMTFLHGIDSQQRRNSKLLFAQNGAPAPGGNAEPPTQANDDDHPASPLQHASKLLSETNADVMLNPRNLEHMNEITMRMNGTLTTPPPDVLRAGTRPTSRGPPSATSTGSMRLENLDNLVYPVGQNNGIDPMYSEHINNIPYAMPPKAPEAGETKPVEVRKKGQFADPGWIRPPQILLVEDDPTCRRIGSKFLYAFHCAIDSALDGLE…
g370.t1	MFAARQLLLARPVAGRRLFHASAPVLVKVGDKLPNVELMENSPGNKVNIADELRTGKGLIIGVPAAYSPACSENHIPGYINSAKLKDAGKVFVVSVNDSFVMKAWGKTLDPSGSSGIRFLADPSLAFTKGLDLSFDAASIFGGDRSKRYALVIEDGAVKEAHVESDNTGLNVSAADKVL
g371.t1	MGKEGLRYAAKVDLDTPAADQKVLHNRWHPDIPSVGTIKNNEVVKIECVDWTGGQIGNNDSADDIRDVDLTKIHYLTGPFDIETAEPGDVLVLEIQDVQPLEEQPWGFTGIFAKDNGGGFLDEIYPEPAKAIWDFEGIFCSSRHIPGVRFAGLIHPGILGCAPSADVLALWNKREGELIEACAHTHDRIVAQPPQPKNAHAGSADADLKEKVGREGARTIPGRPEHGGNCDIKNLSLADGNNSEISFCGAIEMAGVITIKFSVMKGGVKQLDMKSPIYIPGPVEPQFGPGRYIYFEGFSVDEHGKQHYLDATVAYRQTCLRVIEYLRRFGYSDYQIYLLLSCAPVQGHIAGIVDIPNACTTIGLPVDIFDFDISPHLPAEKKDLGSCAFAGK
g372.t1	MSNFDPNAILRGAQLTLVGVNRALQNPGLFTSSHYRQAALAVAAGVAIRILVSVPVVGVRVLLWIISLFVDMNHVTWDESIVDGLHFLEHTVLQVPFFLMTMMRYVTPTLDRMFMDSLQWVDHTYVQKHKSEDPHNLRAMYAQNLEQYPTHAPRDPNEKKKSIKDTVILLAVKQGRKAGISLAVLALSYVPYVGKFVLPAASFYTFNKAVGPQPAVAIFAGSLLLPRRYLVTFLQAYFSSRTLMRELLEPYFARVRYNKEQKQLWFKDRAGVLFGFGLGFYVFVKIPLVGVLIYGLAEASTAYLITKITEPPLPPSEAEKFKEDSLRWKNKHEFLELPWQHMDAHNINMHKPGFKSDVRQTPRKTFS
g373.t1	MSSPVAPSRTAEHAPPPLHNARRSFTVPARLRSSPVPSPASTNSADGIETLVVCPHSRIVSFTAAAAAALAVSDQVGIAWRTPTERTLAVGVLRIYRVTASNVSFLNSGNLLHTIFPRSQCWCVDGQSVFVLRIRQDSYYRMELPFETEEDKEKVSQIKSVLGQVLQYEKTQCPFARNFKVKLPERPKTPPRERPTRRPTQKAKKWTFDKTWMPEDGLRPSTPVLEGSDSANTSSYEEDDRSSIHTDTSDVPVPETPETVFENTPPPKVVRRLSVAERAQLFQSPRSVTAPISTIRNRSASTASSMGCIPETTKEETENKSNVKRAALERKTSTDAASLLSSADSFYSLSAARRSPSPPFVDAEADILNPWVDTPLKQDDTRGRARHRRGVSELTVRAT…
g374.t1	MLLSNLTQTLDERRMTTQGTSPSHADLTSQPASLPDNQLDHGAQSDPQLHLELPAAARTCRLCSRGTFITDLHILHLLIKHVADNLSPIITTQHLVFNLIGIDTLELCAKLTMLPKTLARTYMLLSFDRVVHSCFLART
g375.t1	MDFQSSQYPSSFAGFSTSAAHLSQTTTHSPQNSSFSQYTDPQARFAQSNNAFPYGGLPNGSQGASFPNSMQSGAMMQPGAAMSQSQLHHARAQLQQQQQQQQQQQQQQQQQQHNPYSNAPFSQTLPSPAHQQFAQNRQTASPALSNQGQPYATPLPQQSPTTLPSSNSQQQPMNLNLPSQIKGEPAQAQTPIKTVPQSPVSPVTPARAHERVAVLLEINSLLINEATTLQTQGKGGQIGATEEGKPQPSKEYIDYIRRLQANLSFLAQNAEKIPKPGQPVQPGPAIMSAPATHEELSKLYIKLQGLFPGWKGGQPPARQSPGGPQRMNSNASQPPNSAGLQQNWGQNSMQMQHGQQPKMEPQQ
g376.t1	MYDCIILKSKSKSIIYVVFITLTAVVDETNAPPNTNRHTQYLVRLTSLLTSLSSIYPVLRLGSLNSKSLRLVLLTLRRLARGSS
g377.t1	MSRPAASPWRSFAHRAGAATARRRCINIAATHASTEPALDQQTTIDAAATPVVSPDAHFEVIGSPFSLLSVSLSASQTLFTRRGTLVGLSGKSENTLSTLSFLEPFRRAPVGIPFLYQKLSSTTPLTALVSTKSPISSIVTVNLDGRNDWIISQRQALLAWTGHTLSLKPQYNVKLGLAHWGNTYITGRGLLALAGSGQIYQVQLKAGESYVAHPANVVAYTASATPPMPFRFKSSNFRLQVPDLGFGSFVQNAKFFRVMSQTTTWRAISTTYHTLKTWLRRSIWGDRLFLRFEGPTTMLLQSRASRVSDVLTLKDVNEIAESQPGAVQDAVDRKIKDEIKQIGAGTTAPGVQESSVGAVKYATIRSGKAVFEGPSTPAS
g378.t1	MLIPPLARAASRPGLPPWSLSSLLRPHPLCHSTRVFTSSPLHRKHVHGRRTAPGSQQALQDTSPAKPANSPAQAKVDKSMDPLLGERNLTNKEQRKADWTIIKEMTKYLWPKDNYGTRFRVGLSVALLLSAKLLNVQVPFYFKSIVDSMNIDFAAVGGTATTVAGSMIMAYGLTRIGATVSQELRNAVFASVAQKAIRKVACSVYEHLLRLDLNFHLTRQTGGLTRAIDRGTKAISFLLSSMVFHIFPTALEISLVCGILTYQYGWQFALITSATMATYAAFTILTTSWRTKFRKQANAADNKAATVAVDSLINYEAVKYFNNEKYEVGRYNAALTAYEKASIKVATSLALLNSGQNIIFSSALTAMMYLACNGVATGTMTVGDLVMVNQLVFQLSVPL…
g379.t1	MSDSEASSVSNFSMPPTSLPNGYLVRDFGYQTTSARYRGDHTPENNPDHDIDYDTPEYREIAMENARKSHAIYMGAVPEKKEAKKEGWMRFIPRKEMLPKKGKWMPW
g380.t1	MMSVSHDKDSNSAEGPLRDSRQDPDNGLELYGTQSEREAEKESKSEDTMNPKKERLASVGGQGRTDRRTATGYMPIEDYGLIGNLRTCAMVATDGGLDYMCWPDFDSPSVFCRILDKDKGGHFTISPKHDDLCTTKQQYLPASNVLQTRYLKEEGVMNVVDFLPRPNSKSMDAEYHAQVIASKHTGDVPERSDLKKWLVRRVECMRGEVDVNVEVCPAFNYAQDKHTTEILSYGEQGEHEQRVVFKSKSLSLQLNTTIDCGEDDTSCPSLTFVKKPGTELGNAITTSFRLSEGQAVSFILRDADDHTPDHIETALVDKLQMDTVKYWNRWIGGSCYRGRWDEVVTRSLFILKMLIFEPTGAIIAAPTFSLPEDFGGSRNWDYRYSWVRDSSFTIYIFLR…
g381.t1	MSTAKLPKNFGVILFPGFQLLDVCGPLDALNVLSNSVPLNLSIIAATRNPVGTQHFVQDQQGSRFNLSIVPTHTFADAPQDLEVLLIPGGLGNRSDGNMKPVVDYLSSLGLGVHEESGGEGGGGSKKHLKGNLKWVLTVCTGSEILARTGALNGKRATTNKRAFNHVKEKHPKVNWVAKARWAVDGDIWTSSGISAGIDLTFAWMSEVFGEETAQYVADRSEYERNTDPENDRYAERWGAVQAS
g382.t1	MKHERATLPTPTSSNSFWHSEPNEFLLGHRTTEQLPAEADIVIVGSGITGTSAARYLAEDERAKGKTIVLLEAREACWGATGRNGGHCQPLLFDRSAEVAAFEMKNVHEVRSYIKKHNVPCEWRDVSGCRSFWTEEVMSEAEKEIAHLEKIAPELRSLVTIIRDKEELRKHRVSPNAVGVTLSKGAASLWPYKLVTFILEQLVRAGQLNLQTNTPVNNITSTDGKHTLHTDRGTIDAKTVILATNGYTSALIPHFADLIVPVRGEMSALLPPKGNTILPDSHGMVGALGQPANNDDYLVQRPFEGVPNPRGHLMFGGGRGAGHLPTVGVSDDSIIDQDSAAYLRSALLKILELDGETEGLTELEAVGQWTGIMGYSRDDHPWVGKVPDREGLWLSGGYT…
g383.t1	MASGDTTSFQPTQPVRTSTIDSQKSINSSCQMSPTSAPTSPASRAFFGAITERLRERSRSRTHADASRKRAKSPMAMPPEQLPVAQPQPARQVSQVAAAQAPAKATRPALQHDGRRSTSSSSSSDPWRGRHSNEWLFNGFSVRDTAKGYFERRK
g384.t1	MHTAGTLLARANQLYAANDIHGLHELYSRSGGFGGDPSSRPGSYKIIGICLAIASGLFIGVSFVIKKHGLLQANKKYNEEAGEGYAYLKNAWWWLGMTLMIMGEVCNLVAYAFTDAILVTPMGALSVVICAILSGIFLKERLSFVGKVGCFNCIIGSVIIALSAPEQSAVASIQDMKKWVIAPGFLSFAGVIIVACVIIAFYFGPRYGKKSMMIYLTVCSLIGGLSVVATQGLGAAVVAQASGSHGGQFKEWFLYVLLVFVVITLLTEIIYLNKALNIFNAALVTPTYYVFFTSSTIITSAVLFQGFKGTAIQIISVIMGFLQICSGVVLLQLSKSAKDVPDAAVFKGDLDQVRTVAEQEEPEYEPRADAIRGGSAILRSLSSARSHRELQEAKRIKEE…
g385.t1	MTDHGADLDVFTADIFTATSLADIHAGLAQLHRHEATVTQRLNDLVASQKDLSRDLARLDLLRAHLGSQAINTRAISNGMLADAASTANRISAAVKRLDQEQSNVKATLDVVDQVAELKACVLGVHGSMGAPQDWETAAAYIHRASKIPHDVVNGAFAEEIVPTAEVPDPPRVTLHAAAESLCALFLREFDKAAKDRDGSKVTRFFKLFPLVGRTDTGLDAYGRYVCTGVASRARTTFNSAAPAQRAEAFFYASTLTKLFEHIAQIVDSHEPLVEQHYGPGMMAKVIERLQIEADVQGGIVLDTWHEERNIDRKLTDIKSYAFSFLVQSFLAAQKPSSGTPRSSSPAGPPARTSEDEGVDMKEVDVLLGESALMLGRYALYSRFISDKCAPSQPEERID…
g386.t1	MRFQLSFTLLALLGLSGAQCPLYQQYSSQVHEPFSTGTHNLSYARPIPSCRTFISQEVEDEIKRMKTVIADPDLFRLFENTWPSTLDTTIAWRGWSNTTVEETELGTSEEAPQELTFVITGDIYAMWLRDSANQLQAYVSLLKPDSGFNSLASLFRGAINLQARYILESPFCNAFQTPDESGVVRLSSMNSDRITPPFDYFKVFSCQWELDSVASFLQLSVDYATATKDYDFFKKGNWSRAVETILHTAESMTMDSYDELGNWQRTPYTYCAPYGGTPINECAGSPHKGHIGLIRSYHRPSDDACTYQYLIPSNMMFSAALNASSLIMQQVTPPASTSNLTTWMQQMSTGIRNGIEQHAIVNDPKFGKIYAYEIDGYGSANIMDDPNVPSLLSAPFLSY…
g387.t1	MDIESSARQLDDENGWSGRETFASSVKIGSKKPILNLEEIEHHLQDVQCGDQRMRLHFVDASSARDARAACHGGHGGLGGLIITSHEGCNKDGERAVYRVDDISYAEEGVALDLAVTEALWQDAFDNIDINFGHSQYDHIYRRHSDFSRARRKRQDNLTVEIPTDTPDDVTDVTFDLSSELLDTTFSATDFLTGIDSLVPVSGVAVPDPPIEIGCKNCSTRGQIILTQGAININTKQIDLVPDIFEGGDDGKEINSIITGGYMDLAVTGVGARLEMFAHPVSSGSYEIALFPLPILGFVIPGIGQAGASFEPKISVDFEIDGELAVNYGFDVAIPDGAGIKVELGDLTNTTITGIKGTTLNALPFTSSATDVDLSLSLAFAPTIPIGFDFSDKLSALVT…
g388.t1	MKFAAATTLFLATLALASPAPAPGPAVPETIPEFRAALTHLDARASKPKGSSGSSNTTNSAAVSVSASGALQLVVLGMGVVEAVRLWS
g389.t1	MAPYPDTTPTETVPPEVVATAPPEDSALPGMKRGIAIGVAFSVGIIMAALLAFFVYRRRKQRAAKHTKLSAEEPVEMDAGGLWPQEKKRHVRVAPIEADAYSIHELDGSEIPELPGHYEGQELNANKKTPRASYGDDDTYGQKLKQWNDWSVALDSSHPQPAEEPLRHSNPYLEVSPSQSQQTSISPMGDTLLDAPSQNLSYNCVSPLALSPLEDAHLTPTYGRPTRQQRYYDQARTSA
g390.t1	MASTTDPTVALPTATDTDDDDDDDDVISSLLPSQPPAATPPPAQPTAAPVPTPSLVETAIPGAPSAAPAPTAIPAPAPADPPASASASTSNSILPSSATEHADSLPSSSPTALRPDDPANDVGGGGISAGASAGIGVGVALMVCLVAFGMWFFLRRHKVRRTKTQSTSGHSTDEEHAQKAQKSEVYAYRAGGPAEVPGDEKPRRWSELESPTYVTEVGDGQVIRAELPGSTVPMATTGKEVDDRLFTDPPIDEVDEPVDVHETAIDKKDERLFSDPPIDDAIDMLDAEPRELEKQSG
g391.t1	MQYFTILALAAAAFAAPLEERQAGLCSSGSPLCCATSVLNLAILDCQTPPTTPTGINNFIDICAAEGQQAKCCLIPILEQALLCTDVQPQAAAPAVSAA
g392.t1	MAATQGHDDIVPKMDYHSSKSVAHSASDLEKQDAPQSDELQRKLSSRHLQFVAIGGTVGTGVFIASGSSINTAGPAGALLAYVFVGTLVYSVMMSLAEMATYLPIAGAFTQYASRFVDPSLGFAMGWIYWFSWSITYALELSAAGLIIQWWNQDLNIAIFITIFWIPISAVNFLPVDVFGEFEFWFASIKVVALFGFWIFAIIMNAGGVGPQGYIGFKYWDSPGAFAPYLADAPAVAKFVGFWAVLIKAGFAFQGTELCAIGAGESANPRVTMPKAIRNTFWSIFTLFIFTIFFVGILVPYDNESIAIGNTNAGSSPLVIAIQLAGVTALPDIFNAILLTVVLSAASSNVYSGSRILVGLAENGCGPAFLKKTTKRGVPYWSTAITALMGLLGYMNCSA…
g393.t1	MISEGVQKLHWTQRIALVRHNLHAARRTGDFSFFKSLQAHALIEGTDHVALLNQTLGDSADGVLATLDNLNAGIAYVHQDAFKAIYDNAKNNMHVGEGTLASRRSLLRVDICQQRDMADHAIDKTTNSAINLIQAQPAHCQDAVANAWITGATIMADAVCVCLNEMNSLEDHLDDFISLEYSWNSIQNSVDAAISALRGIFSLMTTTSQPAAPHRNRNLSVSSASSQDHGSAASIRSRNSSTASAFSMIKRAFSVSAPSGPPPSKSARSSVNSGSLPLPDPNSRGFRASISAACPTKMPNFGDHPHTVLTTIPPTPAVIDMGSPDVMNPFKENPDYFAFDMGSSRKKEPEQGSADEMLHIEDLDPLYSPAVIEMPQPLKSRRLSESFDMSNPDGITV
g394.t1	MISTLALALQLLITLRTISASPLPHHHKHAKRVTKGQDVGSGFAIAICVVILAGVFYYLGMRHERTRLWFSRRSSSATSTPVENDSTTPEGHGMKTRISCPLAVSSSAPIKPCDSPVEAPTQSLRYFELPIKEIHEMGQPSPRKPPPRASWLSLDRKPWWLRYPDDEEQKRSARTSRSKSMRSWFKSDRSTENVQVEVPSPSPVQVEVIRVGADSMKEDDKERRSDGSTLMDWAGLDYVRRIYVGRKSRVGL
g395.t1	MTGNTQPNVLLFGAGGVGTVYLWLLSKSSTTTAVCRSNYDVAKEDGFIINSSIFGQGIHFRPNVVRSCEEAASANETPYDYIVVCSKAIPDTVPKWIAPVVTPGHTTIVLLQNGVGIEEEYRVAFPSNPIVSTVLYFPATQRPAGVIKHGEVERLEIGAYPSSASAEHAKAFAQLVQSAGATAILHEDIQLIRWTKLLINASWNPICALSFSKDTDVLESYDGAPDIIEAVMLEIRDIAVAYGYNITEEKVKFELNRAKARIPIHAGIEPSMLQDVQTGRRIEVEAIVGNPVRMGRAKGVKCDRLELLIQAALVFDIGPFPALLSWLNYTFLIALLLTTTPKLPNGPPITATSSKQLRFPAKMTTDSSLSLLFSIVAFLFECVVLLCMSPLIGSGPLQA…
g396.t1	MPVPSLYELARQRLIKNIDMLTDIGDIPFSFLEPVLRHIQNPTQLQELEEACPQIQGETKEIWKRYIRRDVPDWDKKPHTPRDDMNWSKVYRKLMRDAEKEKLDQENQLKEQMKALQAGRDVNKTVIMNTNKAYGARSSNFWASAGGSRGFGQPAPPTKTGKVAMDKLKRGMFDRNQARTKATQTPQHQLAMRRNMVAQIPERLVRMAQLEAPKTMVLSKQASASAAERRVPKPTTNQQHIKQRPAQMPQQSVAPPRTSLPAGQQFNAPKLKPTANGVGAAAAPKRKREGSSMFQPTKRRM
g397.t1	MAVTDWSLLPQADEDALHNVSRLLAVEARPYQQVASRLLKENFFDHVRPKQLPSPPPDASAVEEAAASVFEREQQARKIETWRENIMNELSMLDYAILRFEFTTNSNHTERERYAVEKDGITAKQQHVRDTIEELRVNLVDAKETLAVRKTYDELTEKITSSKMLKPRDEQALAHAKLDEEIAELEHEVQSAKNTWEERRIQFGRIEEEAREMLRMIKDEKEEAERKEGMMKDGDEDGEGEGSTSRGDASHVGTPRPDGGMTPIHVGQSGEGSQSLKVPPQDRLKALSRDASVAPSPARSPGHEDTPMADSGVPSGEAQAEDSDGIDEGEDLEEGEEGEDEGEALSDKMDES
g398.t1	MAPPSKLAVAIGSVTRLVKEEASYHKELVQQEERIKKLEASEGDENKEYTMRQEKQALQETRNVLPAIRTRIEQAVEKLEEQLESRKEADGDASSEEIKKAEDAIAAGKKVVAEGS
g399.t1	MSSPTKRRTQRSSASATPRRTARNSQIPSSPAPMGAEDQLQTEASQASSRGLLATPSGSRLQAGSTQSQSPLFFRSSPVIGSAEDANGAGESNGGATPKASAMNIGDSSPIHYASSSSPGRARNAQNTDLRSSSSALFVRGSESAARHRRSDIHSDVFGASSAGGQRRRLFVDEHGMPVGDASDAATFSNMNPDTSDADALGGNTSRIIWGTNVSLVDARHAMKDFLMNFQRKYRLIQEGELEEGMSLPAEHPAMAREYVDMMKMMLELGITPLNLDARNLKSYPPTRKLWHQLQAYPNEIIPIMDVAIKDVMLELAEKRMAEMRVQLSQQQRGGQPRARDSSSLPPMLSSDAPTPGAPSPAPFADTTNLVSEVDQKTYNVRPFGLDNTINLRELNPGD…
g400.t1	MSDSEQRSEAAIAKKLQDVVISLHKAGNTDDLTVKRVRTRAEEQLGLPAGFLKAADWKQKSQDAIMEAVDKYCGDEPEPEPVKAAPKASKPKVPAKKPAPAGDSKQGAKRKAPAPKKQPQKRRKTTSSEVELSDELSDADSEPEKKPARRAKNVVEEDSDEEEAAPKRPIKKTKPVVDDEDDSDAEPTTTPPRAANKDDVSESELSSLLDESPAKSKRQKKAPAAKKKEPAKPKPKAASKAADDPDQAEIKRLQSWLVKCGIRKVWSKELAKFDTSKEKIRQLKEMLSDAGMDGRFSDEKAAKIKEKREFAKDLEAIQEGEASWGNTEDTGGRPRRRAAARPAAPVQKIEFSDDSEESEENNDDGDDSSEDDLTDDDGDDGKGASEDDAGDDSAADDSE
g401.t1	MSSDTPTKLVREKQNEGRLLLVSNRLPITIKRADEAKYEMSMSSGGLVSGLSGLSKTTTFQWYGWPGLEVPENEVAGLKDQLKSEYNAVPIMLDDELADRHYNGFSNAIMWPLFHYHPGEITFDESAWEGYTEANRLFAKAVAKDVQDNDMVWVHDYHLMLMPAMLREEIGNTKKNVKIGFFLHTPFPSSEIYRILPVRNEILLGVLHCDLIGFHTYDYARHFLSSCSRILGLATTPNGVEFQGKVVTVGAFPIGIDPEKFDEGLQKPKVQERIAALEKKFQGVKLIVGVDRLDYIKGVPQKLHALEVFLTEHPEWIGKVVLVQVAVPSRQDVEEYQNLRAVVNELVGRINGKFGTVEFMPIHFMHKSVSFDELIALYSVSDVCLVSSTRDGMNLVSYE…
g402.t1	MPTLTRIPLAAVVCPSAPFLAPRLLRATVPLAVPLAAAVAPLAVAALQSSQQQRGFASTPRCHANAAKGKKSGRSYFLEMRKREQQQARRRERGDKDPAELSPEVVQLALQLQQACEARHVQQLVDLYPVALAAGIVDSSCTRIICQALHAAVRRSAAKKDSSKPSELLPFVELLIADLRRGALPPHPYAYVHLLGIYKHTKRFHDGRALWLWLAEQDDAHVSQAAYGAAIELMAYGGLMSLPELELLYQEGLKRFPGTYAEYHLSPDAIIPDRTQPVHILGLPTTLLQGIITARLMSRDWRKAYLGLDTVLRLYPGQTPHRIFELFITERPLSEAYTAYLLACRSGVQISGGQVTNLLNRLRVLMPQAHAQADRFTILRAMANALYAYQQCGAGLSSV…
g403.t1	MSRPLSLFSIQAILILAIDDGSRILTKYYSNPHPPQGNQGDYPGQIAYKTVKDQKAFEKGLLDKTAKQTTDIILYDQKVVVFKMESDVMLYVVGSAEENEILLYSVVLALRDSLNILLKNSVDKRTVIENYDLVSLAVDELVDDGIILETDPVIVASRVSKPPAQDMTSMKNIDLSEQGLMNMWDFGKRQLAERIRQGL
g404.t1	MKQRFSSLDVKVIAHELSKALTSLRVTNVYDLSSRIFLIKFHKPDHREQLLIDSGFRCHLTEYARTTAAAPSAFVAKLRRYLKTRRVTSIAQVGTDRILEFQFSDGLYRLYLEFYAGGNIVLTDGDLNILALLRNVEEGEEHEKLRVGLQYNLSLRQNYSGVPELTKERIRQGLQKAVDRQQEQPAGNAKKAKKAGKDALRKALATSITELPPLLVDHALHVASYDSTLKPEQVLADEGLLDGLLKVLQDALRMTKEITEPDQVKGYILAKSNPAAPSAEEEGSEKGRLLYDDFHPFRPAQFENTDLTFLEFDAFGKAVDEFFSSIEGQKLESKLQEREQHAKKKLEKARKEHEERIGGLQKAQELDFRKAEAILANVHRVTEATDAINGLITQGMDWV…
g405.t1	MPSATFNPRQRLSILTNSTLGHDVSAAFKASSESLTQARSNQYGETAAPPPSPIDFSFPSTPKEDRRGSESN
g406.t1	MIDKISQLQGNWLDTQHKYSGADMSELKPFDPNVPQEEVDRLFRKLRDTRPSLEWINKLKNFWQDKYSWPDAQKQISEWHHFTTEMDNLKVHFIHEKARKRQKDAIPLLLVHGWPGTFFEFQNVMHPLLDPKDDAAPVFDLVVPSLPGFCWSQGPPRGWTLQDTARIFDVLMKRLGYNSYAAQAGDWGHWVVRELGSGRYNACKAVHTNMCPGAPPKGYKMNEKEQAAMDRAKWWMGEHLYEGHMGYAIEMRTRPQTIGVAFNDNPVGIMMFIGEKYDELADPTIGTATLDKEEYVRDVCTTLSLYFFTPPSIMTSMLCYYNNVRHEVYTEFNAKEENLIRVPLGVSTFPYDAFPVPKAGVETTATNLKFFREREHGGHFACMEMHEEMVTDMRDFFGE…
g407.t1	MRDDAAELSGSALLTTTSAPSAPHTPSSATVPALKSPTTRAWLSSVRRPRTSPGPGASALKRTLLAEDDDRRDSALASSNCTATSNELSSPASLRRTPSLPAIVVQDEHVVGSRSQSPRHSTSAGESPFHGIDLVIPTGNFDDFTSPAQVSFSKRGSMMLGGRKANRRSQQTNLLLEGASVPTPTPSTPPRTERQEPSNEQQHALSPPAAIPNATHLSPTPRSPSRFSARGRAGHRVLSTDEMMLSRKVRSMYKHGNESDVNWETDTSSLPDTSVDNSIAAETPANASTLTVNRKRDDSSSLMSAARDDNIPKEPTERAGGLEDWADLEGAEVDRYGFIVAKKPGSREGANGEGVDGPDEPRIQRVSTALQLVSEEPRRRGIGRSISRAPSSRSANPRG…
g408.t1	MLTLSKPPKWDFDVKTHDYPPPFSASSTTIRHSPKLNGGPSPSHLAGPNYAMSTSHRGLPPPSAMTLPDPGRGPPPIQSSMGSSSLGALPSAPTQWQGSEDGMKNWLAAKAEEEKRRQEEEKTRQENLKLEQRKIEHSMLRESMQGGIPPHLVPIIFAGIGGGNLANISAEWIQQYTAQVQVAHQQAQAQAQSQAQLSPELRRDTRLLGQQAQTVYAGQPPVSQTILPPTAVLPGQPLPTQSQHTSAAYAGERTAPAPGQAGPPTSGSRPLHQSQLPKLTTNEMHIQQPPSAQSSVQHLQNQGGQEQSSPSIYFHHWVPPASQQEKSSSGHPPATPSGKCKSSPSTSYQSRQRATSHASDREYISSPNKKRKAQGPHAAPPPPTSAPQSYTSPSFSHVS…
g409.t1	MPATDADTGAEYELLPARRSSSTSNLSTRYAAFHRLASPTMSHALRTPPLANTRTQNRSGKATLADGKQVSRIKERVEEKEGIPPAQQRLIYGGKQMYIYTQCAQRSREADTSIRADDKTAADYQLEGGATLHLVLALRGGC
g410.t1	MISWKARRPRQRRPQMLGRMTRDHRRPSAVEKKEKGPGLAERVIDVRSELDSWTGFAHLIPPYSSSKLDARDVHQIADTRVRKKTRCTGRCPCTLCLRAGLSCEYTAQYTRGRLPSVMVDEAAMTAASKAGNTMLNTVPVEDNPLRDLPSFQYAGNGLSTPSAHDRPILERVNRVNGNHEDSNRDPPSRTSPEPAQAQTDSQGHYVGSSSGVSFLIRIQKRLHQNTPTPQDSSIFAWGDSPLPEFDPTFFVLPPKPDAQRLVERYFDYAAPTHRFIHRPTIERWVHEFYETRGDMHAKEDAAAKTALLLIVFAQAQAYMPPGSTTRENSARYFFAAEHQLSKERGAVRLASVQARLLQCFYLLTQSRINHCWSLFGTTAHLALAIGLNRGRRYDPSGTV…
g411.t1	MPAVIREAGLGGFLTLEARRWNQHDNKSLLSPTTLAFLIPVLIVLFAAPFLCVFCIRRRQADRPVRRHGAVKAPALQRSEARERLELVTEVLTVIQNDEKAACVDRLEKKAHSDSPSILEKECAICLSTLHAPSPPEPAKVSNGNGLVDEAKVETPKLVAEREEILRLKECGHEFHAECLVSWVVLHKKSCPICRTVYYHDEPEKPTDIEAQTQASVREQPATIEPVSSTQPPVSNWHYFWTGRNLSQQHTQPGVRSSWQQFRRFRS
g412.t1	MGEKQPSLEGHKSGQSNEPLSAPAHALSFQQVIEETKCNPDDGLTTSEAKSRLEKFGSNDLGDDGGVQPAKILLRQVANSMTLVLIAAMAVSFAIESWIEGGVVTAIILLNVVIGFIQEFNAEKTMDSLRSLSSPTATAVRDGKTVTVPTIEVVVGDLVELKTGDTIPADIRIIEALNFETDEALLTGESLPVNKEAEEIFSEDTGPGDRLNVAFSSATVTKGRARGVVFATGMYTEIGSIAMSLRQKGSRVRPVKRKEDGSRPKPHRYAQAWGLTVGDVVGAFLGVNVGTPLQKKLARLAILLFCTAVVCAIIVLGANSFSNNREVIIYAVATGLSMIPASLTVVLTITMAAGTKRMVQRHVIVRNLKSLEALGGVTDICSDKTGTLTQGKMVAKRAW…
g413.t1	MILLTSLCLLSSLVAAQMIGRYNASDDQNSSVISLVNGRIFTPGLAIIASPQPNTPMGGDFLHIALDISGDGALPFPPSSNPSASTRFHNVNLFLTSTTIDKNFTISNGTTSTPPLSNILEQETGSTVKHVNFEWPLCLVGNGKDAKGTARGAYNISIHQSFRLNGSDFYTIFNLPIEVTNNIEQFPGARQLLTYPKPGPLSANGGRMECGTLANKVRAEDELKGSVANPESQPFGDSGKLDVGNTGNGGGQSTGNGGGQSTGNGGGQIGGSSGGPSGGSNDGQGQIGLSVGSAVRVGVVWTMLLAALVACSQS
g414.t1	MAPFDSTTPETRFDSFDVYRTSYKKVNEQDVEVGILVPKSLRPGTHPVLVKFHGGGLVTGDCLYAPWFAAYFVPLIHRTNAIVVSPNYRLVPEHSGADILEDLADFWTWFRSGGLASYLASQGVAAELDFDRVLASGDSAGGYMALMSGLLQPKGSIKAVLAQYPMTDSLRREPSELFVDLPSPPAGLVDEHVAAIKPGIVVSSCVPPARMNLSYVLSAYGRYLEFFGKDKAMWPLYLVDEKRWLPPTWIHHGDVDTAVSIEDTKAFVGKCEKIEGVEIRLKIIKGQDHGFDTQAKEEEEPWLKEGLQWVEGKWLQ
g415.t1	MTSASTSPPNGVFVPVPTFFKAAAESKTLQATVDVQTQAEHSVFLAKNGVRGLVLLGSTGEAIHMNRQERIDLISGVRKGLNDAGFPDYPIMAGTLINSVDETLEQLEDYKKAGAQWGLVLAPGYFGAAASQEGIREWYTVVADASPLPILIYNYPGVTNGVMVTPETYRILAQHPNIVGCKMSHAVVSWHNQVSLDPKIDHSKFKVYSGLGQQLGPIVIFDAAGVIDGLAAIYPKTVCSLYKLAEARPISNENLEKIKKLQYIVSTTEEYIGKYGIVGIKEAVKRVTGYGTLEGGRLPIKGKLPEGEWEKWSEAWERIQQAEDSLSEKDFK
g416.t1	MGKIAKIEYFRVPPRWLFVKITDEEGNFGWGEASLEGHTQAVEGCLDAWGERYTGFEADEIEHIWQMSWRTSFYRGGPVFMSALAGIDIALWDLKARKLNVPIYQLLGGKVREKLKVYAWIGGDRPDDVKAQAQARKDQGFTAVKMNATEDLHWLDSPRALESAVARLKTVKDLGMDAGMDFHGRVHKPMAKQLARALEPHHPLFIEEPLLSEHIGGIKQLSQTTTCPIALGERLHSRWDVRPFLEENCVDILQPDISHVGGISEMKRIASMAETYDVALAPHCPLGPIALAACVQVDATVANFAIQEMSLGIHYNAGSQDLTSYTKNPEVWSVKEGYIELMKGPGLGIEIDEEQVRRLSKDAVAWVSPGFIGPGGEVREW
g417.t1	MSQPPPIDPRWVAMREKHQEEVGAFARSVATAHKDLNDYVEAAHKSLLKRHSQQERELYGLASSISSRDISVTHSVAYKTQPTASKMSLAPAYTSQKPLPMPGPERKQHSSGQSTALSTAQGSQRQKDQATPSAAAPQQLVKQQMKLLPQSLQAQPQKNEQAPSVSPKGQLFKPGQYKPSVTSLRRQPGRTNKYEIIDLCSDNENDDDDMIVEVRRDAVQKSTAVSTPVLPSIPTATVQLFGESSKKKHPMSKPPHIKRENGEAGRSTQGQPRLPHHARVSNHRPVTNLAPVRLPHSDQSRDSTALNSLSSPISRCTVSSQHQAQAPPQPAHENALSSFDRKNKTTPTNVVVQDMNNLTVHQVVVPGNKDLLALHHHKQDERTKSIAPSSSDMFARKDS…
g418.t1	MFGPFRLTNPLSGGLLWKIPWRLSRHQKYRQRERLRNVDGIVATLDNALARTGLSMKKVDRWKMEMPTEQEMLPKDKYTVFDRKVKRYRKGIHKVPKWTRVSQRLNPPGF
g419.t1	MSYTFSILSPLDVPLFTHDFGTSRSGGDGVARFTPSERALVPFILHSALDIVEEVQWGPSTSSGSAPMYLKHIDKYQNCYISCWITGANTRFLLLTRPRDESLGLTGSGGGARGSLAGGRAALGGGQGLYNPTSPATEEAVKNFFVDVYEAWMKTIMNPFFQVGNGDVVKSPVFRQRVAAAAKKYL
g420.t1	MASHDLSDIKTPPSCTADFCLIPLGTPTASVSKEVAEVQRILKRSGLSYSMHSAGTTLEGSWDDCMRVIGQCHALLHQNGVVRIQSDIRIGTRTDKKQGFKDKVAAVEKLLEGDN
g421.t1	MAFNFNWSPLLADTSRARDMLTTALNKSPKPPIIVDDIIVTELNLGSTPPELEILEIGDLAEDRFRGIFKMSYTGDAFLTLKTKVQVNPLKTHLSTRPDFASPQPLAAASGLTIPLSITLSNFRLSGFVILVFSKQKGLTLVFRNDPLESLKVSSTFDSIPFVRDYLQKEIEGQLRVLFTEDLPAIIHRLSLRLCSPEFQEIETEERLDSTKDSATAVDPLATPPQDAVDAFGNPLDESQISEIALDPVGEIHASFSQKNILRLAALSESQRTLSLFTPGIRDAVFRAWAGPDRDASGTAMPALTRGSLSRIQSTFGSMRSGASSVASGSQGTHDTHDTHDSRPTVSSTYSMSGLTLGAGRSRAGGMRKRKKRVVDLRKKPDGATGEMASTDAHSEMAS…
g422.t1	MAASHFEAKVKSVLSGDTVVLHNIGNPKQERILSLAFVTAPRLKREGDEQFAFESRDYLRRLLVGKVVRFQVLYKIPTGANREYGIVALPDRTVLPEQAVAEGWLKLRDDAGRKGDSDEDAQLLEKLQVLEARARADSKGLWAETGGRINSSNELSNPQQFVDENKGKELDAIVEKVLSGDRLIVRFVLSPTEHIQTMILLAGIRAPSTQRTNPSTGEVQTAEPFGDDAQLFVETRLLQRNTAVSVLGLTPNGQIVADVKHPTQGSITPHILKAGLAKCTDHHTTLLGAQMASLRQAEKFARDRRQGVYQGHVAPKANAPGELEAVVSRVQSADTIFLRNKAGAEKRINLSSVRQPKPTDPKQSPWAAEAKEFLRKKLIGKHVKFHIDGKRPGTEGYDE…
g423.t1	MVPNMETISRLPRRLTQLYSDTKIHCDAVVEQDVQDTQSHVLHRKLRIQKDRLITWGVDWSDNAKGKNGDIDESVEQAGLTETVTSVLGTIKNILDEAEHMHPGGAPAAGKTLSEEKGRLPASDTSAWAAADRSRYEDLISDLTTSIDILYDLSRSRRAQRGPAADVKAGPEPPRPSAAAAIFSKPEYSASDLTLVNPATFPLNAHALHAAARFHLPPKLNTSDLVLPEEEPPPYESVGASSIRVIGRLRSRNSSTNPWRTDGSRNIEQPVLIEYATYDPTYRFTEVSPPTDRLDTLLSILSKLSNDHPHMATLRCLGYFEDPKQPRFGLVFELPSSTYAGASDAHKTIDELRPVTLLSVLQTGSKSLNNSNSATPPLEDRFRLAHSLAITFSKIHGNN…
g424.t1	MAPKRSLQCALLLSTTLGLAHAVSLPEPTAAPAKVEVRAPIVTPAAVRFDGKYSYVQKRDILEDIKNGVEGVAKSWGSVLGTDLPSFFTDGIPGWFENLPTGTDVMSSLGIGDDDLAVIPTQVLNVPPYANWTDQGWNVRLHGNVYKIPNISQSKIDDLANIFLIDTSVDKLPDDQKANARNLTRSIFIVQQGDENVTMTLEPAPMQGGDGEPGGGNAITAPGGNQTITLPYETTAEGDFDVFVPIKSNGLLNGNETENVQRLNVHTNGTDSGNATAFLVPPTGITFVSDIDDILRVTKIYDPKEGLLNSFARNFTQWMNMPDIYRNWSQSLPNNTHFHYLTTTPEQATRNYMDFIYKTYPGGSFDTRPLNFSDVKATLSIRMYLLQKVFQTFPQRKFV…
g425.t1	MSAPFVRPYDPARDFENGLHVFFSTIEPKLDWEPTRTIGSYLWYRVYVSLTPNTCFVLDDGSGRAAGYCIGTADTASFAQRWRDEFAPSVNSKSVPKPEIRTADPLMEREDTKGFRHALHHAECSALQTWPEELEKYPAHMHIDILPEFQRKGWGSVLVNTLFEAVKREGASGIHLGMVRWNTTGRSFYEKIGFQVCSLVLDNGESGETGVDGVALTMVKTL
g426.t1	MQAAFSVRQRSAAQVRERLRRQHIRELDSGSLNKDRAKDRQKLSFHSNRYDKIKPQDPRSPGCVPALEAWLKDKFQDTKAGNAQRELAGASQAEMEKLREELVESEAQPIPMNVEVVAPITRILAAYQKGIADFLTKVNECLRPALAQIDPRRFWTEQLPQSLELIAKFMEQPGITAQAAVCLSHVTEAHRVDTFLITQHIMAMPEQPASFLDELQARLASTAIQRHYQLNSTNVPDCCPVAIYGREFASLNMAAFAAASMDLHPGWDCETNLTAPSFDLQRYVSIPVDFISRTPSSAPLQISAPSSPQVLGCSLCPLCEP
g427.t1	MMPNCGRCVKRGKTEKCIYHPAPLTKPATKRSLNPDPGSFSMEGDDASHWLISGTKPASEAYLNHLERTNRSKSFTPLPRSVRSEGNYAVATSMRTQSHRPDSPLSPQILEEDPKPVLNQIVGTDALEFDKGAAFINHSAVLAENESIVGLSPPGWTGGSRILQSHIDRGVRVLVLLKDLSSIQKYIDKWFSFAGGVVIIEPMVKIYLEGLWSTWHKILESSKAADLQAMSAQIWENTSKPLSRLLKRDTTPREFCSSVTGPDLRWEVIGILASLVSLVAQSLKDGDPVFCSHDAAPVHRVSLAASMHNVSEECTNFCDTLGVLNDLYLWLLYENSVAYCSLRTRGSYDNWKKTSALAAALQCANLHQEITADEHTPFFIAELRKRLFICAYNNDKTSA…
g428.t1	MADPDPDAGKRRGLTCWLLDTRTLWPGSRIAESAKEALALISPEERELILRKYHVADAKMSLASALLKRLFVHKTLGIPWQSISFGRKRDPKHGKPCALLPPPLHGPAPIEFNVSHQAGLVVLVGCKTQDLDAELGVDVVCVNERNEGTMIESEGFEAWVDMYAEIFSHEETFDMKYNAPPFPLLDGTTVTPDMLGRHDRCCSKGQQLSITLPDGSERKFSSDLLIDAKLRRFYTFWCYKEAYIKLDGEALLATWIPQLEFKHVRAPNPGTPARRSTHGVWGERVSDAEVWFKHSRMGECRLEIQAFEENFMIGVAAKERRWGSEDAGLPDILTEFKGLHLEEDVMAIARKG
g429.t1	MTVTIPDFTVGVLALQGAFSEHVQLLRQAAKELKQRKGANTKWEFIEVRTPHELARCEGLIIPGGESTTMSLVAARSGILEPLRGFVKVQRKPTWGTCAGLILLAESANRTKRGGQELIGGLDVRVNRNHFGRQQESFQAHLNLPFLGHTADKSADQPYRCVFIRAPVVEKILPHANGVQATEEERDETVVAPSKTPVDELAKEQLTKEVEVMATLSMKAPALQQNQEHDHAGKEDIIAVRQGNVFGCSFHPELTDDPRIHVWWLEEVLKAAERRQTFELADRAK
g430.t1	MPAIRSTIDRLDKPSSYATAKKRRRNRDDDERGPTPEPEDKLKDATTLYVGNLSFYTTEEQIHELFSKCGEIKRLVMGLDRFQKTPCGFCFVEYYTHQDALDCMKYIGGTKLDERVIRTDLDEGFAEGRQYGRGKSGGQVRDEYRNEYDPGRGGYGRVYADEYDER
g431.t1	MPKVLSYTPEWLSRPSPGYHLFAPKQSNGNGAAARSKDLGPRKTIATRGSEIFVAVGHEIRWADLVNLKEGASPAYRSLRVSIPLPITRLTISPAGDYLAVSTSHTVHVVSLPDPSLLESGSDDSPIKPKTFQVGPTAHVLEESPIATTLWHPLGYHGRCLVTITKAGVVRLWEVNRADRSTFSEPTLSIDLVKLANAQRDQDDLGASKYGASKGFSPDSVELEVASACFGDFPEQEGVHGWAPMTLWIATVFGDVYALCPVLPSRWQLVETPGAFTFLQTLSSSININYTELSEDNDAPKEDVKTSEKQVSWLSDILYEEPFTEALPNGDSVKVFNRPSSTPAVPLLQGPFMVAPQVEDFELSDMIVYSLKTFSDGSEEEAAEGLPAAVVCLLTDSCK…
g432.t1	MFRFTELVYLIASWSSLAAAHTVIVYPGWRGNNIHTNGTASPTDPNIIPGSLGINYDNGTLGFPYGMQWMYPCGGMPTSQNRTKWPLKGGAISIQPGWFPGHANAQFYINMGYGNEPLNYSHNMLPVFQITGPSNLQYDGTFCLPQVPLPANFTPQVGDNATIQVIETAQHGAALYNCADITFAEPEDVPEVNASNCFNSTQPGQEIGFQVVYATTSSPAPHTLVVNGYASIAVPLMLAAASYLTWT
g433.t1	MATDAGPLDAAPLAQAHDLAHEADHEAFHDTQSTTSNMADRDEADTCRICRGEGTDDEPLFYPCKCSGSIKYVHQECLMEWLSHTQKKHCELCKTSFRFTKLYHPGMPSRIPTAVFLRRAALHVLHMFLTWCRGILVASVWLVLLPWCMRVVWRSLFWVGDGGWAGDMYTELPEATNRLQPIMSDPAHLETIHSTLDAARAANTTQNLTLSKLLMPISTTAQHQNAIANEPILWTFAKRLLLGWPHSAITFVPASLNSTDYNSTSDSLGFRSPSLLSDISWFRWFKSQTANRFLVDVFEGQIITMLVVVAFILIFLIREWVVQQQPVINMVALGGDGAPRVDRVAVQVQEEQAENVREQADNVAQHGEGTGRDEPVIARTEPELDANTAARAVELGAGR…
g434.t1	MAAPQSNGRAKKVSKPKASGYLNGSANGHLNGHADKSKSSSVAVRPRKQRRTFTGAVTSILLRLSVWYVILTAAFRCPSSVTQLNDSSPRVCTPYLQVRSYVTPHLDPYYQAYLAPHVEKAKPYVDRFERQVYTPAASFTKKQYTTYGAHRVEQARKQAEAGWDKTVRPHLQNAQNAAQAQYDVYLGHHVKRASDAASPYYDQIKTGSSSAYHKSLLPAYEASRPYLRKARVQGRHVIVDVVFPHVRSAKDITWAFLVRNIWPQLRVLYGDNVEPQLVRISERLGRYRDQQRVESVVDAVESETSTAATDATKIVPTVAASSSSSIASVASASISSASKAASSVVDSILGGDSSSAASGEAQSEASIDPKDSGLSPEELKEKLNEDLRKWQTKFAAAAD…
g435.t1	MAPHPELDANTQAQARSPLAVRALHLAKSLTKRDDYKVIAAAGSRPAQDLSGPGFQVLFALIAVGMTLTAIWFFFWAKNGGFKWRKDDWEDYKSTVLRRKGPDGKTLSNATKSTRLGGGSVVHGGSYGAESSVGYTDETGTSADMSEIRDAEEGKSRHGLRGGDGRRHKKHRRDHTNDYNDPDLDGYRHEKAARVGGLNRQADGMYTDYSPTEPSDLGSNVSGKPLVKKDKRDPKKEAKEKERRARERMKNARAAEKEALKTAAAQAKARKEAEKAEAKREKADQKKAKKTRSEVGSEMPEMAEARTEYTRAFTEYTAPSEYDHSEARDFAPAPPKSPVKASSPVKSPPPVKASAPAKAPSNARRAPPSAAYSFTTGDDDANTVYTGAYTEDSRTNARS…
g436.t1	MSTTMATVIEAVQLQTISKANFQEPSVRTPRPSADSVRTLGAGRTGGIFESEFSSLSASKTPNLHIFLAIFTPSFVGFLSSFTNGVITIGLPEIARSLSLDRSLYLWPSSVYGLTSGACLLIAGSIADIVGARPVELLGITLIGAFTLACGFSTTGEQLVVFRALQGVALAMHLPASVALISGAVPSGRARNLGFACLGFSQPLGFAVGLVISGILIEKAGWRSGFYLSGGALLATAIAAVWSLPKLKTGAHDGVITLAKKVGKEVDWVGGMISGGGLAILAYVLAILSADLATIRSAETATLLALSIVLLLAFPAWMYYRERVNKPALVPNKLWRNIPFTSTCIMVALSYGVMNSIETFSSLYFQEIQQATPLTTSLYLLPNLATGVLLNVLVGTFVH…
g437.t1	MAGTRSSTRNGSNNSSPTKNDAVVGSKRKPEADHDAETSPKRGRKASKNQPTIDSMLDPKPEDQKTKDDTEMQEAAQDVVKDAEKDTPEEKLTEQTAKGKDKDATKKESTGTANGAETKATDGQDAVSKTDGSTNNKAEDATNTEVNGDGAIEESSQREKKMPSNILEKGVIYFFTRNRVSVDEAESVGDLQRTFFVLRPLLTGAKLGDGAVQDLKNNRLFALPKKVFPKSHNDRFMAFVEKANTSIQDLKDNFFKGADYDTQTQGTRHTDPVTPVAEGVYLITRTEDATTHLVYSTTIPSDIGEVQEDLGIKDQGSFIISVKSPERSGPASASLPQKPDFSKEIIEEFRGLAWTEVKPKYLDHEYCQILLIGENMDKAVEPTKKNEKHDKETPKEEIE…
g438.t1	MAEHSRGKTPILLLKTKSAPTDTYEELFSTCDNSRFAPVFVPVLEHRFKRDALATVRQHIVNRGFVPTSQNGLATYGALIFTSQRAVEAFHEVVEDIRKEGSFVVDELLPESLPLYVVGPATARGLRALNLRCPILGEETGNGEALAGFILDHYNALYPGVLNPPILFMVGDKRRDIIPKTLQSEALAVDRRAKVDELVIYETGELRSFKTDFTTVWRGNVDSGSKRQWVVVFSPTGCQAMLESLGLLDVETGKAKKVEGSRDTLIVTIGPTTRDYLINEFAFTPDVVAEKPSPEGIAEGIRAFSKLSS
g439.t1	MAELATPSAAQVATADATAPQEKQQTVRPEKPDEDQFKEDLAKAEKEHQAAQDKLNAAKAKLDTARPNNKDSPNAKRQQELKTELNAIRQAQQGNKTGRNAIFEKMKKLDEQLKSRQNELKTNKSRVNFRSAEDVDQEIARLQKQVDSGMMKLVDEKKALSEISSLHKARKNFSGFDSQQKGIDEIKAQIAEQKKLLDDPEQKALSEKYTKLQTELDGLKAEQDEAFKSLKALREQTDKARAEQQEKYLARKELKDKFYQQKRAFQEYDFQARKARNERRKQEQVQYLAGKRKQAAEQRLEEASAPAYQDEIFATEGLIRHFDPSALPAKETASTSKFAASAQRTVDDSAIKGTRISKKDTEEESYFMGTGGKKGKKGKKGGAAPAAAKFNLNIGIIEE…
g440.t1	MASFSNTDTGSKPADPYTQKNKDEVSLKEKVEDLFTFIDKTKFCLFTTHAGDTDLLASRAMALAAKEGNGFDLLFHTNTESGKTDDIKEDSSVNIGFINPSGEWASISGHASVETNREVVRKHYSPALKAWIGDLGDGKHDGGPEDPRIAVIRVKAKTAQYAISSRTSIGGFVELAKGIATGEAPSVNKLRHLDASEIAQWKSQ
g441.t1	MENPVKEIAGVIHLLTQSPPSTQRQTIETYFTPNASFTHPFCRTGKWPNSRWLIAAIYRWYKIMSPSIDITVQSVAFDESNSILYVSIFQIFRIWLIPFYYAPVFLTSVIKLEYNDDDEKYYIKSQDDLYAVDQWIRFIAPGGWILVHLWQFWATFFCVIGATVLHPITLLEERSNQEGSEVEWQRKRKQFGQLDGMRAEELLQRTELKGK
g442.t1	MSLKYLTLALAATACAAPGSPFQALEAQASSDNPCEPCQPSGATGSDPPAVGSDLSSLYVNVLNSVQGISFSKRGLTARAATSGFCCVASLNCVNVQSLNIPMCYDKFTTNFKFPDGSYGSLTTGDYHSNGQDINLLSGNYSGGNIYSAAPQDKPNTSALSVPAQYTGTGVGAAIPASELGSVIVYTTTVPGTTFTAPTTVPGTIRAATVNGVEVSTSIAPQTITQATTVAPQTTVVTTQVPDATAAASSKGAAGAVGVDSSKSFGVSVLGALMYFLM
g443.t1	MDADGRKVCWSTQLIPQIIINYRRHNAVGLQPTMMMLWAWAGVPLGVYNIVEEFNIALRIQPQILTLLSLLTWIQCYYYEKSWSVLRSLALVIPVACLMGGVQAALIIALRHAKERDLEWPLILMAVLAATLLAAGVGRHYVDIYLHRTVRGISFIFVGLDALGDVFSLLSVIFHSKLDILGMVIYATELVLWTGIFACGAYYNLVPWVKEKRNRGSSSSAANSGPQTGERATGTANTTGITLHDMPSSTSVFRTTSAEIEMHRQRSVSSRISGVAHLPSRPAPSVDCYCCFFVTWQAHRPQFMLTSTPRKSFPTIAQALPSLVFPSSSTSIVGEPFSPRAPTTKDSFYSMATNSVTPTKVTSLGSQYSVSASDDVTVPNPTPRTEALDDEVVDPPPEI…
g444.t1	MASRPSEAPEKQDTEKLLPGGRKIVNGIVYDADGKPCRNCNDMSALFAMGKKTKKLAAPPALPSNCPPDVAQLGRSSWTLLHSITATYPENPPPTLQSETSAFLRTFGKLYPCWVCAEDFQDWMKLNTPRVSSRSEFGQWMCEAHNAVNVKLGKKEFDCNKWEERWRTGWKDGRCDP
g445.t1	MPPAGSGSSRKISFNVSEQYDIQDVVGEGAYGVVCSALHKPSGQKVAIKKITPFDHSMFCLRTLREMKLLRYFNHENIISILDIQKPRNYETFTEVYLIQELMETDMHRVIRTQELSDDHCQYFIYQTLRALKAMHSANVLHRDLKPSNLLLNANCDLKVCDFGLARSAASTEDNSGFMTEYVATRWYRAPEIMLTFKEYTKAIDVWSVGCILAEMLSGKPLFPGKDYHHQLTLILDVLGTPTMEDYYGIKSRRAREYIRSLPFKKKIPWKAMFPKTNDLALDLLERLLAFNPVKRITVEEALKHPYLEPYHDPDDEPTADPIPEEFFDFDKNKDNLTKEQLKLLIYQEIMR
g446.t1	MMPASIIEGHESVSWPLESFTVGRDINSSNPTRIFVDHATHEFGIVYYYANSVAAVEQFSDTGEPVYFQAKTALMACWHSRCKKISVLFQHLQVDLKFCSTQEARDFLDAFKDAATITQNNVFYAYEHNSIKTFSSASFDMMKDERASRIAQHRMDAPAPSSEWPSLRKSGEWSDFTIMAGGKSFPVHRVRLCKDSSYFTAVCNRGFAESNDRSIQLPESERTIDTLLDEMYDTYNSTTGSLFTGFALRSEMEKERVLNDLLDLFVASDKYNFERIKTKVARAIIDRMPFVHDSLTIVDSSNYIFDDGCPQVDCGLRKAVVAQIQCRLPAIINDKAAWQEYSNNKALLKAFHIQLAHLDATAWSEDSPTLLSPPPTPTGGKRKRTL
g447.t1	MRSFAVLAMAASASAYAYNPTYNVSSSAVESYAASTPAYAASTPVYAASTPGYAASSAPAYPVASSSTKYEEYPVTSTKVIQETTFVCPEPTVVTYEEKTYSVTKATTLTVSSYTTTVVKTTHTPEAQKPSSKVETPVYSASIPSVAPTHAPYPSSNATVPTAPQGTATGYPTGTKPATPEFTGAAAQAGVGLLAVVGALAAFFSSLPSFESW
g448.t1	MQARTPQEWPEGTTYLRAPSYSKKLTKDKLNLLLLSKADLSSTERVLTTRSPYANVKIKPISNVSHPAHGQHGLYAAQHLPPDSFILPYLGFVHDQTETDETSDYDLSLDREIGISVDASKMGNEARFMNDYRGISTGPNAEFRDVLVDVGFGLVEKRMGVFVFSAGKSGKRAKGIGPGEEILVNYGKGFWTGRQPAPG
g449.t1	MAPSTRPTLNRNESMQKYILLAAQKEAVQRRISMSIPFGLPMSTSSPEFQSLSSSPVSPTDSTSTYPTATEPVPTRSSTAAQMSVDDLNTDESHKLYEINQQIVATLMELLNTDAVKTDPQYRAFIQEKLMESEHHIRQQRRRHSSNAERDHASSIAHHLELGLNASKTWT
g450.t1	MSSDKDSASESTAYINASVYTVNVSSPWASGFIVSNDGFFTHVGSTEEILSEAKRSHLVVVDLRGRFTMPGIHDAHMHLLFSGLGLTSHATIDMDTTHLNIAEKIKHGNCACEYMNAYQDWVLASAYNNQGFPDGVADRKYLDRLFPDQPVVVSGGAAHAMLLNTAALVQAGYDIENEPDTHGAKFFRRADGSLTGELAESAMAKAAISIPAPSRAHVKRALKHAIRLAHKAGVTSTQEASSNTILLQALSEMEREGSLALEISTHIVHENEWLASESKKGLQQLLEVANQYASKHIDTRFVKIMMDGVPLPPLFTQAGMTEQGDIDHSMIVPQDAVEAVLKYDKKGLTVKIHCTGTGATRHALDAIEAARRINFNGPRHEIAHNSGVHDDDFKRYAPL…
g451.t1	MEITGFTENQLMVREAISQVCAKFPNTYWQEHDQDGTDPKDFHAALAADGWLGVALPEAYGGAGLGISEATIMMQTIAESGAGMAGAQAIHANVYATQPLAKFGTKEQLEGTIPKIISGEWRTCFGVTEPNAGLNTLSLATAAKKQDDDTYSITGQKIWITCAQVASKMILLARTKAAEEAPKPSQALSLFCIDVDKSNPGIDIKKIKKMGGRAVDANEVFFDNYRVPASTLVGKEGQGFKIILDGMNAERCLLAGEALGLGYAALARAAGYARERKVFNRPIGMNQGVAHPLADAYMNLEAAKLATYHAARLYDASITDSSIRQDAVGIAANSAKYLAAEAAFKACERAILAHGGMGYAAEYDVERWFRECMVPRIAPVSREMILNYVSEKVLELPRSY
g452.t1	MKFTSALVVPLIPALSSAAALGRRQNQQGDGPQGGADATQGDLSGRPLPRFPFPRVEFPVPTETVVLNQTMYIYPGQIFDGQMKRYERVEGSCNEQAEGTDADAVFNLMSGATIRNVIIGQHQSEGIHALGDAWVENVWWEDVCEDALTSKGLNTQLRVIGGGARNAQDKIFQDNSLGGKFNITGFYAETFGTFYQSCGNCLNQAKRNVTIQNVIAINGTRMGIINPNFGDEYRIKNSQVQDVKFMVDKEIGNNVQTVPYTVGTGPDEKYALYNMTRDHITGFNGTATNVYEPEQPYEWLSEFWPEK
g453.t1	MSANQSPVAQAHLRIVRPTRSISALLPIYTTGLGFQIIGSFEKHAGFNGAMLGHSSLPYHLEFTEEEGHDPGRAPTKENLLVFYLPDIEDWMRAVKKMEKAGFESAESYNPYWDAEGQGKTFEDADGYRVVLWHGGWSPF
g454.t1	MLELACFTASSALTAARAGASRIELCASYTSGGVTPLLSTLHSIRDELQRSSPSTATIPGAPTAEHGQIPIYIMIRPRGGDFSYTPTEFEAMKSSIDGFQAIGDGAVQGFVFGILTADARVDGPRCRELVELAAPLPCTFHRAVDGVADEDLEGAVQTIVECGFESVLTSGGAGSAREGVERVAGLQKKYGERITLILGGGVRSSNVVGLKREAGVRWVHSAAITGPGEEVDEAEARRMVALLQHV
g455.t1	MPPFTSRCPCTNCTTSWPVRKMCPNHIIATNVASCKYLLQRADPTTLDIRSNFALLERAVAQFDSRFALRALRSISSLRKRLTDRVLCSVIILTYSPNNATARTFIEYIGMDGEAIQSVVSQYKEEVQANKTSAKEPLPEIDVYIAILIQVYLYDQKEHDEGAEFSEKLVDKIRDMNRRTLDSLGAKAYFYFSLFHEELDPKPPSKQSPVINIRGKLLAAMRSAVLRKDPDTQASVTTLLLRNYISTADITQADLLVAQTQFPPNAPNNQVARYLYYLGRIRAIQLSYTEAHEHLTSATRKSPSGNVATGFYQASMKLLIVVELLMGDIPDREVFSQPRMERALQPYFRLVQAVRVGDLQGFLKVVQTHSATFHKDQTYTLILRLRQNVIKTGIRMLSL…
g456.t1	MSPVAHHPPPGVTAVTTVTTVTTVTVVTAVTTGITVITVTAVTAVTTLPFHAPPSPPPIAHDTQHGSTATMADSMEGVVTAAEKPTAEQTEQQAIAGEYLEM
g457.t1	MHVMTLLDNHLEQISLCSASIAELHFAPPKIFTNALLQNHDITTLIRDTEAHERALFSVPPPPAAPTHAEPPTSTNRRNTIFNPSGGPGATTSGGGANAVRAPRRNTAVAAVLGNELVERIRRGGGGGAGSGLGYRKYDATNKNDVDVDSLLEGAEKLLGVYRVPGAHEKIAAMRQRHARLESSLEYYESRLAEQTARLGRLKKSRGDYADEDAELDDEPQEDVVLTAEDLRREEEEVKQLESKKRGLEDRVHSMGRDISGLR
g458.t1	MSATKVALITASSAGLGAQIARVFAPDFRVVINYSSNSERAQSLLKELNAIPSTASSSEPRFHLIQADMSSKPSVENLVKEALDKFGRLDVVVSNAGWTRMTTFTDIEQQVNEEDWDKCFVMNVKTHLWLAYAAKNALAETEGTFISTASVAGVKPSGSSVPYAVTKAAQIHLMKSLAVILAPKIRCNSISPGMLLTEWGLKFPETKRNAAINNTKLKRLATVEDCADQVRVLALSRSITGQNISIDGGSSL
g459.t1	MEVFSSFYAFADRFKRPIYIAQAVLVLGAFITGCTLVANTSMPRSPFTTLVLVYAIKSALFLLYQYLSTHMARFRRFASLKANYILYQLDCLLWFTAFFISCMGGGRCGGSSCTLIAVATTIALLLCGTYLFTAIGINWPKWRASMKLPQVEQV
g460.t1	MEKMGTATESSRPPKEGEEEVAATESGSISPGIVKKLDEKIIKHSHDADAAMKAFEGMDGQVFELTPEKNKALLRKIDWHLMPIMCIIYGLNYLDKTTLSYASVMGLRLPPSDNKLASGINLKSDEYQWLGSLFYFGYIAWEYPTTRLLQRLPLGKYSAFNVIMWGLVLSCFAAVENYAGAIAIRFFLGVFESAVTPGFALFTSQWYTKREQGSRTAIWFSFNGWAQIFGGCVAYGIAVGCRKTGTAIEPWKIIFLVTGLLTTCVGFVFLWIMPDNQLNCRWLSKEDQILAIERVRINQQGIGNKHFKLYQLKEALLDPLSWAFFFYALIADIPNGGISNFFSQLIVGFGYTPEQSLLYGTPGGAVEVVFLLACGWAGDRYGYRILISMIGLCTAMIGM…
g461.t1	METYHGHVRTPNDAIILFEACRIGILPRVQRRLSEKERQQIKSGSVFVWDEREAGMRRWTDGKSWSASRVSGSFLTYREMEGKRGGAAPTPPLVKRASGKSPDGSATGDSDGEGPDGYRYKPDGLMKQSFSITTSGGQHLHLISYYSRSNSNNLPQPTNDAQLRHIRPPKNMYPESTVNETQAAPAVTRGPMPGSPHAAAAYSMGPASPYPRPGPVAPMYAIPMYPPTPPNGTPNIHPYHYAQHPGFFYPPGVIYTQPGYHMPPHPQGHVLDRPPQPIGHLHAPPGHPMYAHHPVYAAHAAQAGQYMATPPARAPSSAELAQHQPPPPPTPASSIPEQGPQLPAINGAAASVGIAKPPTPEGDRSPSHIGAESTTAATSRPLPTLTSLLNTSGTDKDNQ…
g462.t1	MLTIMPHNEVQKTTWQNASRAGQQKQEELVRQDFADAGWQAERLLNAMSKAPDFYFQAIQQIKMTEWSNNRVVCLGDTAYAPTPLKGMGTSLALLGGYLLAGELAQLEHAEHPGKALEAYEKAFRPFVEKTQQIPNVVPGIAHPDTAWKRWLLETAISTMVRAVNSPLFVKLIGGAKTAEENDDGFQLPQYESLDRVL
g463.t1	MSLVSDATWAASPTTTRGQPTPLSSDPKGERIAYASGKSIFLRSIDDPSVSKQYTQHTAQTTVARFSPSGFYVASGDVSGAVKVWDCAGEGATKGDYHIIAGRINDIAWDGDSQRIIAVGDGKERYGHCITADSGNSVGEISGHSQQINSVSIRQQRPLRAVTGSDDSSLVFYHGAPFKFNTSLREQHNRFVFGTAFSPDGSVFASVGADKRIWLYDGKTGEAKGQIGEGVHTGSIFGISWAKDSNKFVTASADQTVRIWDPEVGKAIQTWRLGEEGVVSIPDQQVGVVWPTGRSDGLIVSVDLEGNLNYLVDGNPKPTKVVRGHQKNITSAGISGSTFATGSYDGRVLAWDVSTGLADKVGGASHSNYVAGITAADSKGQAELYTVGWDDSLRSISVP…
g464.t1	MGDPYNSGHDQGYLHATGDGNLSNMINSNGYDPFQQQALINRNTHSSTTYSYHDSTNYQLSPQAAQYSPRQHQAKTHPCDAQLTPHTRGTLPYQSETMSRDPSHTSYRSSMSSGQQYGSPHFEQRNSAPGIWSSNRLDMQRSRSMYSDASTLHSQPINPHLDAPEAYQQYVDSYDPEPIYALATNFLTTTRRHSPNMHLDESVIDFFSNTTDVNLSDFGMGDIGRNAGQSSYLTTLTPHIRPRAKSDGHSTQRPRPCTLLSALEDKTAADPSDSVTLQPPLPAQQPKHRVRARTPPSDSESEVITGHVLASGRFKCSDPKCDNLRFGRQADFRRHHINVHALKKKEYFCTVEGCDRSRRPSRKSKGRSFGARKDKMKEHVQTVHFKESKKRKRSSGTAA…
g465.t1	MFNFTPLLGAQSASPASQSLLEFDGGVKVLIDVGWDDSFDVDKLKEIERHVPTLSFILLTHATTAHLGAYVHCCKNIPAFTRIPVYATIPVISLGRTLLQDLYASTPLAASIISIESLSESAYAYPSAFPGGGNPNILLQAPTHDEIANYFGLVNPLKYSQPRQPLASPNSPPLNGLTITAYSAGHTLGGTIWHIQHGMESVVYAVDWNQAREHVLSGAAWLGGPGTGGSEVLEQLRRPTALICSSKGSGKHTNIKGNQRDEALLSMIRDTVAKGGSVLIPSDSSARILELSYLLEETWQNEASRADSTSPLKNAKLYLASRTGGATMRYVRSMVEWMDEGIVKEFGAGGAADGQEQSKGRTGGGKDDRGARPPFDFRHITLLERKTRVTRMLGDAEPR…
g466.t1	MSSSTSIGPSPPGAPIRLSTSSSPPPSMSSASDSPLTTPNFDSNIFSTSDSQSDSRRNSHTSPDDIIPKVEEAELDLADVKEETDDTPISPTEPVRIRRARGRPRIHPPRSPTTLSKQAKARSKTGCTTCRKRKKKCDETKPFCLSCQKNNIHCEGYKPLEIWKSGKERAAEARKRSEDIQFDLPPLMEGVESDLDRSLLQHFANRASAVLTLHGDKATNPFTKILLPMALQHEGLMHSVLCLSASHMYSINPSQEYEDRQAFHRGKALQLLKHDLERQKAGEGGVMVYEDSNVAQILLHLLHSICDGNTSGEYRMHMVAAKQIAMSQKSANPEFQSLFDEFFYYHWIASQITSMDGTDVPMMDDFSLPFKINPETAGLIGVSDGLFGFISKISNLRRR…
g467.t1	MESTGKSRAGVDHRSHELGAEAGVPAKEQGIDKQKQPLPESIHPVRSHASHADNAISLREVDPVSVRLEHLSVSVDESPNALAKAFSKKKAVAGQSHVKKILDDISADLRSGTLTAIIGGSGSGKTSLLNQMSGRMRGNRISTSGRTLFNGSEDTLNIKSAYVIQQDILLPTLTVRETLAYAAQLRLPSSVTLSERKQLVEEVITELGLKEAAETRIGNHAHKGCSGGEKRRTSLGVQLLSNPSLLWLDEPTTGLDSTSAYQVVKTLQNLARKGRTIVVTIHQPRSEIWSLFDNLILLTRGSPAYAGGAEECLNYFAQLGHTMPPFTNPAEYLIDVVSVDNRSEEAEAVAEERVEHIKRAWRLQYDKMSSEKGEQSFLTAPAEPQPTKVLVSRHSSMIQ…
g468.t1	MSPQIPSPDFTTLPTDLKTLVVDHISRPTDLKSLCLTSKQLREITVRRLYRQVTIDVGSSKDTRLGAFLNPKNIGLPHIRKLDLYLTEVLDKCNQIHQANFAVRMILELLPENILDKFSWHPWSPFSADNLVLLYKKQKRLKWAESIALDRHVLDQLQKIPGFKEQFANVRKIGLYPDSREVLEYCHFILKHTSNLDKITLHASFEDSDVPIPDRELNDSSTGPGLITSTIFSHMQPFAKCTPLALKEITLQKLGLRYAADTYCKLIDFRTVKSIRTFTCTGTDALFAELSKSTKLPQKLDTLEVKLADNPENDGLGALDGFLCLVSGIKVLTLDYSGVNSLPASAGIVRHGKTLIQLSIHASRAPEECDDELVYDYASFSQICKDCTLIEQLSAAFPK…
g469.t1	MKISSPSGLHYPIVVLELLKKPDDDVTRSERLFTYTYESTVTETDKWGEDKTLKKKLTAHFDASTEGKISRWYIKAGTVVARSGTEIIEIEEPCTHEIQFGGLCAECGQDMTKVDHLTQSRNTDRATVNMTHDNVALLVSHKEAVRGEEETKKRLLGAKKLTLIVDLDQTVIHTTCERTIAEWKADPENPNHDAVKDVEGFQLADDNVSNVAANWYYVKMRPGLKAFFDRISNKYEMHVYTMATRAYAQAVCKIIDPERKYFGDRILSRDENYTDKLKSLQRLFYQNTAMVVIIDDRADVWQYSPHLVRVPVFNFFPGAGDINASFLPKQQELVTQSRPAPAPTQRTENVPVATPDAGESTEVTPVEGTDGVPDALEQQLLSMASPETLDEQTKEQEKV…
g470.t1	MASQDRGRARSSRRLSKKRRDLDEKPRRRSLDIPERFKDGEDADDDVTAPKKNNTLSMNQSIFSMIARAGQQSHKDLATMHEVDSGDSDEEGKKRQAYHGLDGAARLSRLSSANDFPQPTEELQADQSHQGKQHRRVLSEHKLLRSLPRPKSRKDARSKDHPMEQMSSSQLLPPRPPLPESSPSVSPSERSSMTKPKATADEDTNVENVRSSERSSSYGSSAGMAKTPAVPVTLAQRIRQIFEFEDVEEVISEYPCWLLQSILLQGYMYITQKHICFYAYLPKKHYDVSKTGYLFKRGRSKYNRYWFILRGDILSYYTNPAELYFPRNRINLQYAISAEILEARKKNEEETAFTVTTDEGSFQFKADSAASAKEWVRSIQKVIFRTHNEGNSVKISLPI…
g471.t1	MGKQGSSKRLGAESDWRGPMHDLIRPPSPKPHPQPSLQAAPSATLCPSPSSTSPASFECIPPFYHISTAIMKTAILLAAGALASPAVAGVHKMKLQKVPLSEQLKYANIQEHAKALGQKYMGIKSENHAEQMFKAPYVADGTHPVPVSNFLNAQYFSEISLGTPPQDFKVVLDTGSSNLWVPSSECNSIACYLHSKYDSSSSSTYKKNGTSFEIRYGSGELSGFVSNDVFQIGDLKVKHQDFAEATSEPGLAFAFGRFDGIMGLGYDTISVNKIVPPFYNMLDQGLLDKPVFAFYLGDTNAGQESVATFGGIDESHYTGKLINIPLRRKAYWEVDLDAITFGKETAEMDNTGVILDTGTSLIALPSTIAELLNKEIGAKKSYNGQYTVECDKRDSLPDL…
g472.t1	MAAYANTNTNTNTKMPQQQRQSALGNVPRVVIRPVWDNMVAVSYLPKGIVFFARHPYLYPMLKTRLLPAFLLSAFVLLNLFVWTFLPQVAFLSIFHKGGSAWVNGTFLVLGEGAAAVALLFEAFLVDETQVDIFDAVMIHKGYEHLVRQHRPVSDEQLNDPVRRLGRPTKTSVYAPFSFRQIAEFVILLPLNFVPYVGVPLFLLLTGYRAGPLQHWRYFQLLGFDRKQRDKFVSKQRWQYTWYGTVYLFLQLVPPFSMLFLLTAAASSALWAADLETARREHEERIIAPQYSDEPDAVV
g473.t1	MNNSQFRRLLLSDQAKPQDGSSQSASPASRTPASRTPGGALGARKHSSIPMTPRQVGRGSSVQADFARQLAERNAKAHPQKKARASAPKGTQLAAGYTDRTKERVDDDDSELAKRIKNLDEAMRLGQIDRETFEKLVQDMTGGDVGTTHLVKGLDRKLLERVRRGEDVLAGHKDAAAVGGEEEEEEEEEQVEVASDVEDAFDELAEADVGPLTRQQVEKKGEKLMAPPPPPLPVAGAKRTRADILAELKRQRDEAARAAEAEHAKRFPTLGPGFRKVTPQGERSRIETDDKGREVLIITGPDGKEKRKVRKQKAEPQPAPEIRHDLDDATKPINMHNLPAPKQRDEAKSDDDDIFAGVGSNYNPLANLDDDEGDDDDEYSGEEGKAAPEAIVEKAPSAP…
g474.t1	MFRTLLVAALAAVSACYTTPNATNSTTTTFKNPILDTVAADPWVFRHGDYYYMTYTNNENITLQRSKVLTDWNNAEFKLLFKPPPGMNYSTDLWAPELHGLDGNWYIIFTADPRNDSPPPETDMWCEYNCPAVNHRMYVVEGIGADPWTASYTYKAELNTYDQFSIDGTYFQHNDQLYHIYSCWYRKYDGWPANLCITKMSTPWTVSSPFTDRQIISTPEYAWEKTPFGRASNDRLSSNEGPQQLINPETKQNFLIFSAARSDNRNYCLAQLELVGDDPMNPSDWRKHPYPVLYQNPGAEAYGVGHASFTTSPDGKEDWIVYHGMQDPTNGWGARTIRAQKFTWNEDGTPNFPKPGYGPYQIPSGQ
g475.t1	MARLALATCADTTTAPANAPEYGTMPAPSVPVTYASSYYGSEVDVDVDVLSVASMSDYGSEFDATDINEDALLASTLDSIAQHRPSATDKGVLLPSIEFEQGEVEDEDHDDLVVVHKPSLLRVAKKDRRSARHTNTRRHVQSSPMRDTLEVEYDERSRRAWSVPLEEPQPAPQPSRTRFSRTNSVPASSRTLSVPTAAESDTRPPIERFRTKPKKPLSVTDLVSPAWCELQYFYTLSRFGRKPRTQAMRTGSRIHQKLEDEVHTTVPVQVQSKEDRFGLRMWNAISGLRCLRDSGLTRELEVWGVIDGQVVNGIIDEVSYECPDPALEEHVELSKTQRSGGTVPLPKDQPSIAQAFAKASGADNAGDAWIGRPGPDRQIYIADVKTRGVRTKPTGASLR…
g476.t1	MAPSPSRAMSDRPAVTLSARAPSRLRVQGNRPCHGCSYHGCDIIQSVVFTRKPRSTKSNMTWQQEFWSWMSPSRVPTAEPPAVGEKAPSTHKLTVPKDGKPTIVAFLRHCGCPFAEKTFLNLRDAAAANPNVQFIAVSHSDQDSTDRWLASLPDTSKNTQANLDVVVDAEREAYGAYGLGVSSFMHVVSLAGLSNLNKLGKEEGIWNRPTESGNRWQTGGNYGIDRNGTVQWSGKHERADDMSDFKEGVALVTAH
g477.t1	MARTKQTARKSTGGKAPRKQLASKAARKSAPSTGGVKKPHRYKPGTVALREIRRYQKSTELLIRKLPFQRLVREIAQDFKSDLRFQSSAIGALQESVEAYLVSLFEDTNLCAIHAKRVTIQSKDIQLARRLRGERG
g478.t1	MTGRGKGGKGLGKGGAKRHRKILRDNIQGITKPAIRRLARRGGVKRISAMIYEETRGVLKTFLEGVIRDAVTYTEHAKRKTVTSLDVVYALKRQGRTLYGFGG
g479.t1	MAASPHRPVQNDLSSPTPLPRASARPISGITMALSPPPRALFFDVFGTCVDWRNAVVKELEAQAHVALNSATASLASRVRLTASDMTEQHWASFAQQWRDGYKKFTQRLATDPSVPWKSVDEHHLESLKQLVSDWEIDGLWDEEHLRAISLVWHRLDPWADSAMGVTMLNRLFYTCTLSNGNLSLLSDLRIHSAIPFTHIFSAELFGTYKPSPHVYLGAAHRLQLPPEQCAMVAAHLNDLRAAKDNGLKVIYVERPDEEDWSREQVERARDEGWVDLWISSGNGSKGFITVAEKLGIELNAADQSRRLIRVHQPGVPPSGSTEYKFATVDSILGQQKPEATNPEPQESFVGAATYCRSPWAVEGTSTMSPRHIQDEVYAASMKDPEKFWTRHGENLYWH…
g480.t1	MSRADDVINVAAHRFSTGAIEQAMTTHPSIAEAAVVGIPDALKGHLPFAFVTLATHPHPGRAVPDEKLLSEVQKLVREQIGAIASLGGVIQGKAMIPKTRSGKTLRRVLRELLENATHEDFDKEVNVPSTIEDGEAVKVAREKIREYFEVKGKHLHKATEVKAKL
g481.t1	MAGKMTLYKLVVLGDGGVGKTALTIQLCLNHFVETYDPTIEDSYRKQVQIDGQSCMLEVLDTAGQEEYIALRDQWIRDGEGFVLVYSISSRSSFARIQRFHSQIQRVKETAMAGSPTYPGSPISASAPVFGQAPVMLVGNKCDRVTEREVSTQEGQALAKDLGCDFVEASAKNCVNVEKAFFDVVRQLRRQRHQGSGRHSDRTEKTRGPRGPANDRVRGSGGDRGGNNGRSTKRKDKPKCIIL
g482.t1	MSAYPDPNENAPHPYTTLYPQHPNTQQLDGQTSRGLLGAPGVSGAPGVSYPPPPEPGYPKIENINEVLQAQALHANHALTDQRPLPPPGQGHGQVQIASAQQQSNIDSNNTNHGHGHGHSHSHGHSHGHNHKPNRLRKACDSCSIRKVKCDESGPPCRACLALEIPCTFDRPSRRRGPPNRHAEAIKKRRLDETDPASGQPSPQSPTNAAHALAQLQSSTPTQLSADAICPLNTMNALIDDFFTHIHPLCPFPHEPSFREAWARREDYTNPSFLALLASMIACLVASFPRKPRLHLKTQTRHEYPSHLSLVDKCREVCTQARGPGYLDRPSLNVYDACTSYFLGLTGAYVFQWRQLRLYFAECLTIIRSLGLHKAHDQGYTHLGAVPSAWGSDGPNFDG…
g483.t1	MARKAIAKDQIVKLIVGAGQASPSPPVGPALGSKGVKSMDFCKEFNARTAHYNPGTPIPARITVRPDRSFHFSLRTPPTATLLLSAAGVAPTKSKIRGAGNVPGPMNNHEGQKGKTSTNSPTIGNAVMGTVGTVSLKHVYEIAKIKHSETRLSGLSLEGIARSVVGQAGSLGVVIVP
g484.t1	MGECTPAKPVVRLYGGTPHSTERLHKPFKCPGSAASTRISEKPARKRRKVDYAGADGADGDDKPYSNDDRLALATRDINRFPVFKPKDKDTAFRARFSVPLLNKDATSYNANRPAPLLGMRLGAVFVARPLHDPSGEFAIVLYDPTVDDKPASTEEVVPKMSQEEKKEMDTPVVHKSLAEILGLKKKVDEERPRVPVVIDPRLTKVLRPHQVEGVRFLYRATTGLIDPKANGCIMADEMGLGKTLQCIALMWTLIKQSPDAGKSTIQKCVIACPSSLVRNWANELVKWLGPDAIHPFAIDGKATKEELISQIRQWSIASGRSVVRPVLIVSYETLRLYVDEFGQTPIGLLLCDEGHRLKNGESQTFTALNGLNVQRRVILSGTPIQNDLSEYFALLNFA…
g485.t1	MLSGPPRLVPFLFVAFVLALVVWYRHGVSGTGASASLSPWKLGSALSTERPSSLRPGVDPLDFSIPLRFSEGQPKPAGSNYTFKIVVPKTTKEDLEWMQQEIPHAPLVVYEVDNDKAENKVPKNKGREAMVYLSYIIDHYDDLPDTSLFMHAHRHAWHNNQLMGLDAAQIVNRLNHDRVARLGYMNVRCHHDPGCPDWIHMDRPGGDFDFFHKPEEIYWRKSVWEEIHPGAPIPPSISGICCAQFAVSRDRIRQVPLERFQHYRKWLLTTGMDDQFSGRIFEYIWHYIFTGHEIYCPAMNTCYCDGYGICFGGRQKFDDYIKKQDDRNAKWNQLDEFNKRADKAKEDGKEPDFTDAEKVTMDTLKRTIGDMDVELDKLREDARKRGDDPKLRAEETETY…
g486.t1	MLTATIQLRSAGVGARPEPTSRCKVQVTPSLWDYPRSHAANHSCPEPTTSEKDVLESLKYEWERLEEDKPAPETSGLGRRNVIADLLDFEIYRCPLKDQKRSSELTSLHLFDVKAKNLSFDGYVRLGQVEHYVERIQIQDLSIEGYGSREDPDIVAYIQTRLASIETTHDIWLQLKQPASRYKRFHAPFMWVATLGKHAIDYMDDQKKNTVGLESFKNDFHCWLIQRFGSNKKFTEWFAAFGNVRDFRVALNAYVDFFYNQVVNLSTSKHLISHPVWSHCKCNRTMAIERQPDVVKDTLATPHVFESFKHVYFASKLKPASPSKAVKEMQHLRKQMLGFAEDRTAQTSSEHTVTEFTSDSGARVGDVVSSSRTRLIKPIGESLVLSGLPMSKESNIFAT…
g487.t1	MSQLVTPTIRQGGVNQVYVMPNLVPPVTSVQAALEYRDRLRAIEPNVHYLMSLYLHEDITPEVIREAKKAGITGVKSYPAGVTTNSSSGVLSYEPFYPVFAEMEKQNMILNLHGEVPSTPANTHVSQTGDSASITILNAEPAFLPTFRSLHARFPNLRIILEHCSTAAALDAVRACGPSVSGTITAHHLSLVIDDWAGDPFCFCKPVAKTPEDRDALLKAVVGSQGRFFLGTDSAPHPSTKKRGEDKVAAGVFTQPYALGYVLDALQVGVERGVVKEEEVSQEVLEGFFGGYGRKFYQVRDEKNERIMLKKGGEKIVDVLNKDGVSVEVVPFRKGEQTWSAEWR
g488.t1	MTSHPMQQCCVIGVKHEGTPKGDIKNIGDIRAYITYPENRSTQNAILIMTDVLGFEFPNVQLIADQFAANGYFTIIPDVFNGNTVPLNPGPDFDFPTWKATKMPREAAVDPIYATVIKHLRGELGVKRLGGVGYCFGGKYVCRWLKEGGLDAGYTAHPSFVEVHELKGIKGPLSVAAAETDFIFPAEKRRVTEDVLKEMSVPYQMTLYSDVEHGFGVKGDLSHQRARFAKELAFLQAVLWFDEYVKKETHDTPIPNPSC
g489.t1	MPLHLLGKKSWNVYNPANIARVRADEEAAAARDAAADQRMQDLDAERRAALLRGRTPPPLPEEPATHSDRTRAREGGHDTKRRKLAGEDDTDMDIRLAASVANPTHGDHTDAKLLKLRTPTSDAPLTDHAGNIDLFPVDVKEALKREKNADAEKEKRRRELAFEDQYTMRFSNAGGNNGLQEPWYTARQKIAHPTYATTAAPESSGFDTKNVWGNQDPRRKEREQARISSNDPFAFMQKAQTQLKKSKQDRKKWSDERNRELGELRDAQEKEERVQADIKIVIAIVDTHIVGPLHRDITGVEALVAGHDKTSTLTHDQQVIHELYTSGSFPNHQVKPYPH
g490.t1	MPTWLVHGFRWPRAQVRIHTILQNLDDVAPEWVMAPATQACLTDNFKQQWPDIMARLPTLRFIEQYDPDDLTVKDQPYAYVCDQVHDIKLGIDVDELQQAPALSDEQLAAVAELRDKVTPDAKLGWFVVVNGDVERWAPPLDDDDDDDDGDDGLQHEEDEEEAETKTLSPPARSPGSSVWTGNAQEPVRPSTSRSMKNWIGGMLRKTRR
g491.t1	MSRRDFLSMPAPENYVAGLGRGATGFTTRSDLGPAREGPSEEQMKEMLAKRAASLGQAAPSAYGVTEKKEEEDDEADRFQDPDNEVGLFSSGMNYDKDDDEADRIYQEVDEKMDKRRRVRREAREQQERDEYEKNNPKIQLQFADLKRALGAVSEEEWAALPEVGDMTGKAKRAREARMANARSYAVPDSVLSAASKSGELETSISTGDSDSGTMTNFASIGAAQLSALTVRLDSAASSNPGTQTTTTSGTATSVDPKGYITALDKKEMQGGEVPVEDINRARVLLESAVKTNVNNGPGYVALARLEEVAGKIHTAKKVIQKGCDMCPKSIVVWEEAIRLNRENLHNAKIIAANGIKLNPKAIVLWKAAIDLEQTPAARKKVTRQALDHNPQSVELWKT…
g492.t1	MAAPGGKFFIQDDMSKPAAHHESYAQLWETKWKKPAEMGVYPFMFGTAKDFEPIVSELTKGNFKEPYNWDEYAKVYFPQAEHLKSIAKEAEATGEKEKASEYYLRASAVYRISRFPAPRSGVQREAWKLGKECCIKGLGMREHPVHEVEIPHKHRSNNEGEIIPVYLLIPNTATKDKPVPTVIIFTGLDGYRAELAVWMEGWRRVGVATIVLEIPGTGDCPATASDAKSPDRLYSSLFDWIDEQPLLDNKKTAIWAFSTGGFYAMRVAHTHADRLAGVVALGGGCHHMFDREWLDNVNHLEYPFDLANTLAYKWGYGDDVETFKKEAKSKFSLLEDGTLDMPECARLLLVNGTEDEIFPIDDYYLALQHGAPKEARFVTGIKHMGEPISFFIIIRWLYK…
g493.t1	MQIQSSSPSGIGKALQQLDGKLEANSIVYAGEARHMPLLGSFDLTVSEARMFAHLDLGPDGATETTPDSSVKGIGVPKRRDTVSTFNNDLRNFCTGQPPKQSFLAPGGRTPPRFRMSRRSTLADKPELDSLLKTVMITYKGKEFLPLDENTVHRLSQYLNGSKPLAPTCLFTRLMITSDANKIRADRFVATLEQVGVYCKHLAIISPFHAIEFGNVFACEVDTLESGSDWERILQCFPNLQTVIFEYPAGEPTILTRDTFYALNCALANSTTLKKIEKVQLDVPPRVLFDYHCDYHYGQRQCHGPSPHAFSATSLPLTMVGSDMVYADDVEASDLLDVDVVFGKVETTDEVDAINKFKTETIPL
g494.t1	MVTGARKPPSRKGSMADMPRDLKEQIEKLEELFVVPTQKLKEITDHFVKELEKGLTKEGGSIPMNPTWCMAFPDGNETGRYLALDMGGTNLRVCEVTLTDEKGEFEIIQSKYRMPEELKTGTADELWGYVADCLQQFVEYHHEDEQLEDLPLGFTFSYPATQDYIDHGVLQRWTKGFDIDGVEGHDVVPPFNKALAERGVPIKLAALVNDTTGTMIASAYTDAEIKIGCIFGTGCNAAYMEECGAIPKIAHLNLDPKLPMAVNCEWGAFDNEHQVLPRTQYDVIIDKESPRPGQQSFEKMVAGLYLGEIFRLVLLDLHKGHECAIFEGQDASKLERPYSLDAGFLSAIEEDPFENLLETGDLFQNKLGITCSKPELELIRRLAELIGTRAARLTACGVA…
g495.t1	MPQHQRAYGQPSESIGGLVALEWRVDVLERSIAQGSSGRHDEYVSISISKRNRWGEGHRELDTDDEDEQ
g496.t1	MQGLSRGGVDKDEGNGDGKGKGKQLASDGETLGALLLLRSESTDGEGKWEKARTRTRRATGLAGYWAGGLLGYGATGLRGYWPIGLLAYWATDLLACWPAGETADACARERERPCACCLFRGTSPPLQVQPAVATLLCACVAAPVGQSTTPRQAHDEAAAFDALDALGPVGALDPRDT
g497.t1	MAFASYSPHREAGTMHLDLPSPTYRLDGTHFAHLQQLRRSLSRSPSKPSRFQLHKSDSPRSPISPLALARAFSPKAHKPTSPIKTFFESPLAQAVPAKKKFTLRRPTANFKASPRARQNSKSPRRVLGDSPTGANSTTPFYTRPTVGQENDTPARPSSSDSLESMDTDCRKFGLNDKPIKFEFAHRRPDLSPGPPVKSSPLKRNDGVMNLSGTPTGFSPVAKRRSLHSVSNLGTDFESIFDRNSMHAVQSPMEEEETQNEFDFSTPANPSQSPMRRATSLRKSTVMQRNANSPRPKPAFDGEFAMPGLAASKSRNRMSLDSSLGQSTTPTQTPFRKSTFDAGRMGLPTPFVRSTAGASQPHPLSHAHTPSSTTSGLGGMTPMAPPRAPHFAAPPGRPNQ…
g498.t1	MSALVSRSRAEAVRKRRAHAKSRKGCGNCKLRHVKCDEARPLCKNCKLYGVSCDYSGLQSSSFLNTPGSFQVHFASNYPDKTKPNNLIEGNALKMWMPPLKSISIHSGLPTIVNDSLNFNVRSLGWLTGSQHFTADQLMIVSRFRNRTSITIGNPQMAPLYRDLVCQLACKHAFLMHMLLSVTLMHDAHLANPSAVASKSSQEALRHWNTASKLFNEILSRPIPPSYQDAIWTTGVFLGAASFWSIGSTNPYEVWPLKPAEPDDLSWLKVGEGKKHLWRLAQPKRPDGIFYELVKNYNCHSVPEWMAMDSELHISDRMKRIFDITASSDEHDNIYYRPILTLSKCPNIQLTYENALKFLYILAVLTPDFFALLEAKDVRAVFIMGWWYMLLRTGDLWWM…
g499.t1	MANCSLVAPGLVSQYGGQAPTFSYRQTSHSGDYFGIQMTYMNGASTCYSGKPNFTPVIQNPAQGFSVDCTFVISSSYSGIYCPSAPVTRIPNGVLTVSYKNWVNNQPTPIAFPATFGPSPAPRAVTATAGAVATSTATQTSTVSPGFASTVTVYAAGATQTYTNTIIVTQTRTTTNTNYVSSCAAPSVVSSSSRSPASSSGTSSSTASAFPTPSGLSNSCPEDDGKYVYTSAGTFQITCSYDRDGTTTGLFHPGNGLLGCVDLCANTRGCVWSTYYSAQDACYLKFGTGVPNYSTAAWSANLITASSSSTPVPSTSPAISSPISSQVATSSSRASSSSAAAPAPSPSSSSLSSPSPSPSRSSSSSAAPSPSLSSPAASPSSPAASSSSPTASSSSSVVS…
g500.t1	MKQSLPVVGGTDVPVDVGKLQVDTADNYAEDVVQGTTVKGLPEVDLQSRQVEQSLPVVGGVDVPLDAGKIQVGTVDKYVEDVVKGTTGL
g501.t1	MANKRKLNEHDVPEEESPQLTKRRASDASQSDVPTTPSKPTTAPAASFAEFELEPRLLRGIRDQRWSAPTAVQSKAIPLALQGRDILARSGTGTGKTAAYLLPVLHNALRQKGKTSLILVPTKELALQITKVAKALSTHCGQDIRIQNIAGKESEVVTKAKLADNPDVVIATPARASANINNGALSVAELAHLVVDEGDLVMGYGFKEDLDQIAQSIPKGVQIFLMSATLNTEVESLGSLLCTDPVVLKLDDLDKDAQKVKQYVIKCAEEEKFLLIYAMFKLRLIKGKTIVFVGDTDRSYRVKLFLEQFGIKSCVLNSELPLASRLHIVEEFNKNIYNILIASDETEILGLRKDDGTSRPRKKSKTEKKAADTDSGVSRGIDFLNVSCVLNFDFPSSYK…
g502.t1	MASNGTWQWDGRYQKFYLFVGNDANGNPVYEWADTVPQPSNAQLPSGNTTQAQPGYEQSRARSDSVVIDPNMIPGASEHVRTQLYFTGTPERGWYELDSSYRMRTRAEAHRFFQKGRVLAMLYAETQSETSARNYRNGTDNTAITVGRFGQGVFSQIRRFVIVKVKRAEHFFYACAITTYGRRGVTKPGCNAADHSVVYLNGKLPIMYSGEAEQGLVKDPIMIMPTDANEAMDPSSRLRYGKMYPIEWNVKFRDVGMVSPRDRTKLMRYFKESQQAGFDSDTDDDTEDGADEPQPYRQASSQYSYSHGPHSGHGHY
g503.t1	MPVSSSIPSALAGYKANTQTSFSSDLNARQVQTRLKSLIRRQEDLQETREEALINREVLSESRQHMREQRARTAKVEVTLMNAFRQHYNQISQSIPERLAVAYRAVDEERNKLGYLEDEYLQAEEEQGALEWNFMDLESDLYQYGLRDIFPESNLEGHSVPALEDHIPAPRLPKPMSPSTAIQYQVLTKELEGLVQRFMKLRQQISDRLISATNLSVEDADLIDLGSIEFVQSFLDLLDQITNAEVRVQHLKATMIQHGTEPVATTRSFSEPTILSRDRISLKMVSHTRSDGSLSQLEDSNFIVHHIRDWLVECLRENVVQRVQYLSTLHKALNFVESLLPDVAQWETLVRQHWASNEMEHLVQSVSVTPSAFEGHDLSLQDNDSNSALHASRSDEAYA…
g504.t1	MAGTIQPNDTNMANTGTLPFSSIPDLDPPLTLKKPTAPRSPRIDVEPLYSAVKGAISDADWTTYKTSLTQFFLGNLNQEELSFKLGKILNTAALEHAHNTLIAAIYANIWRDAPEPGIASWVSSTDKPSSSTVKGQGDESEKRLKYEVMQLSRRERKRLKTIPAAETGVQDAIGGGAGTGALGLVNELAEMRRGKQPEIGPVGPTGGYKTSTSILNILLLHVCSIDLETLDPRSLGSVILTTRTDWDLEIRKRYTAPLFSETHEFPTSLSISARLLPTCYEFGLPQGHTPECPDLMNLATETYIKEALASFLGKVAVNGVGYVRTGAFKKRVEREENAVERGEAVRDGKGELPVESEERRKRKQLCMEDLRLALQLGDGYLGQTPILAGNITNSTFLDV…
g505.t1	MTVNGEVKSQAIDRDVLRRGLVTSSTKLRIESLGRLEHQVADESLVPADLQALLATLFETYPLYDDRESRRAVEAVLKSLVNGPHGDLVLPVIVKFLKEECQKKGIAHVNAFVLVDWCSTLLVQFAKQPERWSKFGLDLALADARVLETCVAAGSDRRATRISHSALVVTRRALRAILGSKEIGKDALDKLVANLTAKGAAPAAGNAVFLGVIAGVSSRLSDVKLRFEQHKQEYYAFYVREIVGSRSQLPDHISNAFHDFFDTFPTLEELRKEVITPIEKALLRAPEVVLNDIVSPMILALPESMDLSDVFISNLLKPLLSNVKSSNPVIRAGALRTFTALASRSQNEDVIGKVADEVLNPLKQGKVSGVEQKVLHAQMLSAFKESSALSHKIPAGIAP…
g506.t1	MAKKKKPAGNPARGFATTSVASKPKVEKSAVDEAAVNKESVPTSSKDSADVAKTATPAPKVEEVAKQEAAQTPEELEAQLERDELQLLVEKHAAKVRRESRRQVTKFETDRRVLRAQSHAMTVHDWLPSEVLDTIISLAQTESNDSNRRQGQQQSLLKVMSEEDAMSKLWTLNLTLRDLGFSHEQIEPVLKWLCADAGGIDATSTVWGLQEALEWLALDQCKGHAFSYEEPKPKQSAIFTPDVSRPASPVPDTSAVKTNSASAFDRASNKAPAPGPPTLADSDHGDVHVSDIDSDIDLEELVPTYLKIKSKLYEIDPELVEASPRKKGPKGKKAAPVKTVQSPQVRKLLSQLQQLESDTLFDDREAEAQWPTKRNEIAQNQAAKRQQETTPSKSARKQQ…
g507.t1	MANNPNLQPHHSLPARPPPTTYSAPPSRPTNAGARTQPSSAMFAAFTPRSVVAHAPPQVSAAPAMYPQATVSAPYQASAYPTSNTYNSYSYPAYAAGAPAASYPSAAATMNRDAGGTYDPEEEARMAEWNSAYNRDDTNAKKTGNANVGIAQASPPDADAGPTADGKKKTVVREGGGKHWEDETLLEWNPLHPRLFIGNLAGEVTDDSLLKAFSKYPSLSKARVVRDKRSTKSKSYGFVSFADTDDYFRAAKEMNGKYIGSHPVLIKRATSEVKVVTKRDDKHGKHGQNNKNKNKNNGGNKTNTATAAPAMTATLPFIPRGVQKKGKHSGPRVLG
g508.t1	MSEAVGDFGLIGLAVMGQNLILNAADHGFTVVAFNRTVAKVDRFLNDEAKGKSIVGAHSIKEFCAKLKKPRRMMMLVMAGKPVDDFIELLLNEGGIEEGDIIIDGGNSHYPDTNRRTKYLAQKGIRFVGTGVSGGEEGARYGPSIMPGGNEEAWPYIKDVLQSISAKSDGEACCQWVGDEGAGHYVKMVHNGIEYGDMQLICEAYDIMKRGLGLSNKEIGDVFAKWNGGVLDSFLIEITRDIMYKNDDDGVAIVEKIMDSAGQKGTGKWTAINALDLGMPVTLIGEAVFARCLSSLKSERGRAAGLLDGPSPSFSGDRQAFIDNLEQALYASKIISYAQGFMLIQNAAKEYNWKLNKPEIALMWRGGCIIRSVFLKDITKAYRANPDLENLLFDDFFNK…
g509.t1	MADNKRQSMAGKVATPTLKAGSSKDVGDADSNLYKAVGSRIKITCAPNDNVLEGTLFTACNTTNAIAINTAPAPPNPSASLATQPGDYHIIPFAHILSFELVGRATESNAGFDGAIPSIAKVDMAALIAREEQTIREMKKKDAQKGKGVSREAQEIYDTISRTLPTRWADSQIVVNDAVLVQPPYTLDSIRAPAGKEQSAAQVKKIIERYYQQKRATDGATKAPITTPIAPRKGG
g510.t1	MVTELKKLELVGTVGTDVEFGTVNNGRMPESLRNLSKEIAALNRKLVRKIDLIVLPVIDILYILNYIDRQNLAAAKLQGIMEDLNMTTQQFATAISILFVGYLPFQIPSNLIIAKVSRPGLYICAAVVIWGSISAATAAVKTYGQLLAVRAVLGAAEAVFSLGAIYHLSAWYNKTELGKRIAALYIAQQFGNAFGGLFAAAVFKLDRSHGIRAWQWLFTIEGSATVVIGSICAFLMPEFPHNSKTFSPIQYDLAVWRIESESGAAEGTEDESVLKGSKMEIAAAKVDAHPINVPNAV
g511.t1	MAPDVSMEDGTSLSPAPHTVEKPTAIPNVDEVVFGSLLIRPWYPSFYPEELVGRKVERLYVCQWCFKYAKELTGFIKHLRACPLRSTEPPGNHVYTSNGYSLYEIDGEKNKLYAQNLCLFAKLFLDTKSVFYDVTTFLYYLLVAHDPTPNIPNTQLDGDAPVGQNQVVGFFSKEKMSWDNNNLACILVFPPWQKQGLGQILMGASYEMSKREGRLGGPEKPLSDLGHLAYVHYWSQTLARTLLSSPSKKTLTVHDLGQRTFIVPDDIIATLQAMDVLEHKKRGGAEALINKAKVRAWVEQHKVSLKSPVDSEAFSLRERSRSESEE
g512.t1	MQSEHRKIELQAPGDLIHLTSQIRAAARSKLDLHLPAQPSDAHSPDDLRAATETLVDAFVAQVLAGLKSNITINGIDVVSAAGGGGFGIDGHDGHDGHDGHAGHADAMDGVQQSAAVPGVEEVEFEPFDDKLRARLAEHVARRDRLVADISRHRRETAAASARRFEEVFESEARLWDAQSRVAEDKAGGVALELLEGGRAVGIAREDEVRRNWERAVEGLGRLNKGLPETRARLERCGDVVGYLAADKK
g513.t1	MSSSIAIPKRKSKALERATESGSVGSSASSPSSYQPSSYGSFEAPSPRQGSKARRPSLMSATFSKAEHTVVNVGDAEYPRLITCVKASQGFDWNQEMFLPSYADFQFDDLERRQDPVQDIVVTDEEVKNMFPTS
g514.t1	MAVSMLHAPSRASTSSTTSSFVPVSRQNTMSSHDGSRSVRQSKRYSVTALYLSMSAKDKELEIEDDLARAQKILRELKTKISSQSKKNFVLEKDVRYLDSRIALLIQNRMALEEQNEVASHLEDGLELQEGSFPNDEKTQKYGNLLFLLQSEPRHIAHLCRLVSMAEIDALLQTVMFTIYGNQYESREEHLLLTMFQSVLTYQFDNTPDYSSLLRANTPVSRMMTTYTRRGPGQSYLKVVLQDSINSLIELKDLDLEINPLKVYEKMVSELEEQGNLPPHLPKGVTAEQAAENEKVQQIIAPRLNMLMEIANNFLSTIIKGLEETPYGIRWICKQIRSLSRRKYPDAQDQTICTLIGGFFFLRFINPAIVTPRSYMLIDATPAENPKRTLTYVAKMLQN…
g515.t1	MADYEASFEATAPPARRRPSRVKSADDAAHSAPPSSTGTDDSGSKLSKTSRPTLKKTCKNHASAAPAPIYEEESAHWEDDTVGHMPNLGQIPEGHEDTRDRSRDSAVSSAVEPHARRRRHSEDSSSSRLRVRPKHGSLQRRAGSLAKHSNPSLASVLSGLTQPSTASESNTTITEKSHRHERRRKEKSSKGSKAQRRKRAEAPSVADTEATQSDVFQFLSQDAGGQDSQLDAQSVLQASSPSVTSSADSRDKDSKSSDASEGAHDTPRTSPTSTRRSYSQGAPYYGHYQQPSGKPLYQSSFVHGPGDEEAEDSEVYSDEESTYDASHMPHPSQPAPHWNYPPNSQPGNAHATHLRQQQHRFAGHVLQSPQPHHNVPYAGVLSPNVQPAVPFHDPRMYSG…
g516.t1	MDPTVKYLLSLGAIRDRAKVVGQAAKNGNLNHFDVHEDKLDDVADFVTSVIKRDYGPDKFDTIPPHGRWQHFEVGNVPRISDLLEEWKKSGCDDKELTRRLIDLFFVSVLLDAGAGDHWKYIEPKTGGSYERSEGIAVASLYMFLEGGYTAEETDTPLVDGKGLAQLTTETLAKGLQVTESNPMLGVESRANLLRGLGKSLLAHPDIFGAAGRPGNAVGESVRLHSIVPAHHFPDYLLESASDPATLDILVFWDLLQTLLIPIWPQDRTTINGSPIGDAWPLGALANQAGSSHTDKSNPEFIQPFHKLTQWLTYSLMVPFQRILNIKWINAQSLTALPEYRNGGLFVDMGVLSLKKPTLDKGLKASREALPQFAAGDDVIVEWRAMTLVLIDKLYPMIL…
g517.t1	MESYVYEPIDLANASFRLVRPYQDDTGPIRCELFHAQIHDAKDAIEYEALSYTWGGTIKSCNIELNGKNMPVTERLFHALQHLRYTHEDWIFWIDAICLDQQNISERGHQVQQMAPIYGFARQVVFWLGLATPNTDQIFASMQILE
g518.t1	MAHQHGHAHLIRRQRNRQEEEDDDPVATVIQIVTVPNTPTSKAVRVTQQNDAPKTLVPPAVATRPFSTVSDDDDDEKPTSTRPTAASSKRPASTTIHTTESETETAETSTAKSTKGQSTLIVATKSPVASNSASVVGALVSATASATASISATPTSDASESGGMSGGAKAGLALGILLGLAALLAGILFFYRCKKNAMAGEKDNEKIGMHGAPAPLPPQVPTGAAPSMDTNRTMSTAPRLSLRPVTQFDPTFNEQRKSGGLLTVAAAAAPIAASQDRAVSPEERPVSAWERRGAANAAPAAAVAPAANPFNDPQTPANTQPPANPFGNSAALDAAHAAIPDSPPQAFPTHSAAPSADLDARVAPAPAPEVDAVAVANAVTNVPVSGTEFPAPPSLNANT…
g519.t1	MSSSTTEKVADKLPSKEELKEDVKKATKSSVQSLRALVAGGVGGVFAVVVGHPFDLVKVRMQTAEKGVYNGAMDVLRKGIAKDGLVRGLYAGVSAPLVGVTPMFAVSFWGYDLGKQLVTSVSTVENGQFSVAQVSAAGFFSAIPQTLITAPFERVKVLLQIQGQKNLAPGEKHKYNGGVDVVRQLYKEGGIRSVYRGSAMTLARDGPGSAFYFATYETVKRKLTPKDPVTGLPGQLSMPAVMAAGGAAGIAMWIPVFPIDTIKSRLQSAEGRPTISGTIKGIYANGGYKAFFPGIGPAMARAVPANAATFAGVELAQKAMRKMFDKDGD
g520.t1	MDETKPKVSLLKQHPALPLLPLSSGPPSATQTLIVNYPAARLSSSPASSPNIVEPSIERKGSVHPTLGNSMERGVSPGVDFFDDQSSGSEWEDADDEDRTQTLSEDGEVGLGLGSLVHSPVRQHRRSRGRSRERSGLTALPAFNQKHSHGPLDGFGNTHENAGPNKARHVSLTRMEKVNVRVVHNHGSNASTPRGSVMSNRSEDTVTHIPETTKPYSIDARGEAAFLPEYHHGHHRRNTSDSVIADSIINAHLTTMQALKALSPSSSVPEVSGHSFYSATSIEPPKARSFSDARHIKLSPISVKDRDHLPSHFVKTPYPFTAKKEFPKPATRPRHRNADGRLDSGYGGDSGYGGEGSRNEYSNFKGKHVVALMSNDGAYDLHSRLDRNVDARGIFPTQD…
g521.t1	MSEPEDQPQQLINGTLKPLIGMDSKSTIPVIKSKAEYLKAVMYEGISFLSLPTAQVTILEGTATWCQQCKVIAPEVAKLVEEYPDVKFYLYDVEECEDIAHELGVRSMPTFSIFKDGDIQDGVTGAKPKEIRKAIEACL
g522.t1	MADTNPPAQPAAAAESAENLHTDPVTGEKISKSELKRRQKQREVEKKKAEKAEKNANLPERPKKEGKKEEVELNPNQYFEIRSNRINALRASKDPNPYPHKFHTNTRIHEFVEQHKGLTRGEELKDGPEIRIGLRVMAIRSSSSSLRFYVGKAEGVTIQVMCQLQNAKGDVPFEKQHENIQRGDIIGVVGYAGRTAPKKGGDGELSVFAQEVILLTPCLRMLPTEHFGYKDQEQRHRNRFLDLIMNDSTRETFITRSKIVKYIRQYLDERDFLEVQTPMMNKIAGGATARPFKTHHNELDMELFLRIAPELYLKELVVGGLDRVYEIGRQFRNEGIDLTHNPEFTTVEFYMAYADYEDVLQMTEELVSELVFKVKGSYETVYHTQSGEEYKVNWARPWR…
g523.t1	MGNQISQMFPPTAAFTESSLPSGSLKDKVYIVTGASAGVGKELARLLYSLNSTVYLAARSKERANAAIEWIQTSHPDSKGRLEFLHLELADLESIKPAAEEFLSKEKRLDVLFNNAGVMVPPQGSKTKQGYELQLGTNCLGHYAFTKLLTPLLAQTAKSSEAGSVRVVWVSSSAAHLGSPTGGVDLENLDYHRDKFAFHKYAVSKGGNVLHALEMRRLHEQDGIISVSLNPGNLNSELQRHSGWLGGLVISLITYPAVNGAYTEFFAGLAPDVKSIKQNEWVIPFGRITPLRTDLAEAGREGGKAGEFWRWSEEQVKSYL
g524.t1	MATARRPEKPSAVPANPIPSSSPAFGTPVHPIHPRRTAPIRAPPALAPKAKSTVLPILLPPATLRPLAFRTFTKKHNLTLTSSALQALATFIGKHCGSGWREEGLAEKVLEEVAKSWKKCGGQVIVDGDTDVFKGILRTLEGAMEGGRVAQASTLGRQSSFSFGAEHKGVSPWPALDATSSFGMSTLHVQDKDEEEEMLRDPREWIKVIGAFEQPKQVYNVSQRHFEKSASKPSLFPHPAHKTDLFRQRYHIVHQRILRNETFQAPTFSTARSATLNRTGSIATSQTNTITPIANLLGRTGSTHLLLGMLVVSPTGALSLSDLTGTIALDIQHARPIPENGAYFAPGMIVLVDGSYEEDHGAASSNLGGTGGIGGTIGGKFLAFSLGHPPCERRTATLG…
g525.t1	MAEPTDAPLATVAEAEELPKTKEKLDELTQAASLQYSLKNFSAAADHYADAVEIQAELNGEMAPENAELLFYYGRALYKVAVAKSDVLGNKVAQEDQKKKKAKRGVKAEASSSAASGAKTEPPEETTASKPYFQLTGDENWDDSDDDDDEDGDGEGEQDEEEDDFGNAYETFELARVLYQKQLDAQPDASPAEKGKGPATLSPTSRAIKEKLADCHGFLVDISLENERFHDAVADARSSLALQEELNPFEHENVTESHYSLSLALEFASVSKIREDQLAAERQQDSTSPSTTSPAATSDTDGINWPLRKEAAHHTELAIASLRARLSKEEAALAHPTLTAAQKSEKTAIIADKKAMLEELVGRLHDLQRDPTQQHDYDALDPSVVQGLFGSLLGADPAV…
g526.t1	MAVLQPNAHPGSPAPGAGQRDLFAGAQTTDTAPRRADDQRRLRRVKDSKEQLKRRNQARGTSNGTIDTSTSNSTSAGRSYTVANVHNGVIYLRPVVRAGNQRNLPQPDPFIFPPQTPPDSATLDTKLRPTSNEWEQSLYGSRTPRSEPTPPLPPDLLTEYEARQQAHAQHPSTSRPIAHPRAHSFSTLDGHTTTSATTEPGTFKVVIERPPFGARPKTADTSSLPLLQVPIPHYRLGTPRFSTKGTVDLRSSTYTRTSATDEFRNSLLTPQRVASHSFLSSRPQSDAFSPVPARYRATMDRPPLPASAPSSSRVSHAPIGPRLYDALTANPDDRAVVKFSPSGEILAATPSRLVAHITSPSFLDYELLSDFFLTFRAFLSTRDLVAYLIARLRWAVDRQ…
g527.t1	MFIALVLSLLAATALYRGFTLYRSWQSNIAIAKSSGLPVVAIPWNVFGVFWLATFYIWIPILEVILPASWRGLWFDLLDPEWGHRKGHAPFEKLGKDVFIIASATRLSAFVADAEAVTQITTRRNDFPKPLKMYGALDIYGRNLVSSEGSDWRMHRKLTAPSFGEKNNELVFNESLHHARSLLGLWTGPEGQGNETVEDPAVATMSFALFVISSAGFDVRVKWPHEDETRALSVETDESKSMLVGSEKPAGHNMSYREAISELLHNIMWTQIIPPKYLHLSPIKVHRKVGAAVTEWGQYMDELYERKKQQVTSGDSNNPGMDLFDALIRGSGIIDGKRNIQKSDLLGNAFVLMLAGHETTANTLHFSLLFLAMHRDSQKRLQQDIDKVLQGKPVEQWTY…
g528.t1	MADPDAPAQKRPRLDSVNPPLYNHNGHGFPHPPPPPPHTQHTRQSSHPTPAHAAPSPISRHYPAHGLPHPSHSYPPSGQAPHPGPQPSPSLPRSDIRAYSDPRTIPSPSQRPHGLVGPPPAVNISQDNISTYRPPPTPQSATVPEPQSSRSSASADVKPQPPPMDHGGHQSPWGMNPEHRPNGHMSNGYSHSISPTHHNVGQPFHPPPLQAPQYDQGSYAQSPYMGQYAGAAGQQVRRKQCDEARPCQFCRENNFDCQYKDVPPPKQDRSMMQLQDSVNDIGEVLKNLVGEFTSWRQSVETRLPLARGPEHISSVASPEAAFAAPNRDQNSSRFPTPAQGRNQMRRISSMKMESPNVSHSQMSPVAAQAMTPVKQESMFAPPQQPATPADSVRSEHSGA…
g529.t1	MQEVEVEVEVEVEVEVEVEVEVEVEVEVEVEVEVEVEVEVEVEVKAEVKVEVKVEVEVEVKAEVEAEVKVEVEVEWEGIEVAVPVETRLPPAGAHPRPSSPRSPSSSSPPPPPPPRAHARQPAMRLLARAVRRPRRAQQPSAALGRRHLANNGFFRVSDEVREALHAKKAVVALETTIYTHGFPYPENVALASLLESVVRVHGGVPATIGILDGVARVGLDPEELIRLTDSAGQPTTLKLSRRDLSHVCGLRLTGKHFNGGTTIASTMLLAELAGIKIFGTGGLGGVHRGAESSMDISADLTELGRTPVAVVSSGCKSFLDIPRTLEYLETEGVGVATFADGRQGNVDFPAFWSRDSGVRSPTTIQHEAEAAAIIHAQHQMQIRSGLLFANPVPLEAAI…
g530.t1	MRPFSLFTSAMAALSSVARAELNLSEPLRSKQLLPSTFTPPQVFKNAHLVRTSNLDKAYARETVNVLIENIDAKPQSEYYVPFDASLLAKVGGFEVRDKKKAAAGTFRAEVVGLEQGSSTEFYRVHLPEPLAPGAQQTISISYAVLSSLHPVPAELAQTAKQYLQYSFSAYAPSAYPTDKQRTKVKFPSADVTDYTTLPAELNDEGKTDPQKQGSTFTYGPYANVPAGAHQPVSVRYEFTKPVVHSTLLERDIEVSHWGGNLATEERYWLVNQGAGLKNHFSRVEWQKQSYMNPPTFALKGLNLPLAPGAVDPYFTDDIGNVSTSRFRPGNKENLLELKPRYPVFGTWKYSFRVGWNADLSTYLRKLAKADTYVLKVPFLEGPRAVEGISYGRVILRVI…
g531.t1	MSRTYGAAELHMLLPGPGSGHACLALYDVCPHTTHSSVSHARDPYVHQTLLFAPPPARSLERRDEAEGGIHTRRLSSTFSQHPLASIPTSPLARLVLSKHSPVTRSLRATAAFPPPPPPPPPAIYLLTFATDRSPSTRSFAHLLNTHLPAHIPLLYTIDARTLPVPPARLCAAYSGVAAAVQDFVLRDEGARDAVRRAVEELVRAACVDGSGGGTGGREVALAVCCTAGTHRSVAIAELVALGVRREVRRVGSKDGVKIVVRHVHRVRGVEDPY
g532.t1	MASSPSMLTKFESKSSRAKGIAFHPKRPWILVSLHSSTIQLWDYRMGTLIDRFEEHDGPVRGVDFHKTQPLFVSGGDDYKIKVWSYQTRRCLFTLNGHLDYVRTVFFHHELPWILSSSDDQTIRIWNWQNRSLICTMTGHNHYTMCAQFHPKEDLIVSASLDQSVRVWDISGLRKKHSAPTSTSFEDQMARSNQNQADMFGNTDAVVKFVLEGHDRGVNWVAFHPTLPLIISAGDDRLVKLWRMSETKAWEVDTCRGHFQNASACLFHPHQDLILSVGEDKTIRVWDLNRRTSVQSFKRENDRFWVIAAHPEINLFAAGHDNGVMVFKLERERPASAVYQNNLFYITKEKHIRSYDFQKNLESPSMLSLKKLGSPWTPPRTISYNPAERSILVTSPADS…
g533.t1	MATHERPPHFERLHGCPTPPPTASSIHAPPRFLSQANHTPPPYKRMEAPKPLHTPPLEFTPIGHNQFRFTRAQSIEQSSRPSSISGHAYAGTTPQETEYEDSSEEESEDEDEDERPVRRVEKPDFELEEVDSNDSEDENIEVVQPDHCEDAKSDRSGAALEDTGVMDRLRELHVEEGSTDEEAKERIYLRKKKRWSAGVFKRTHSQSVEGDSSYSDDDPQDDNNLEARRLRRKLRGPGPWNRRASLIFEDKGFPNTNNIEEVEEPEEGMVKHTKGPPSIPSDDAFTLDELPFWRGAYDSMDVENESE
g534.t1	MISITKIIVVAVAAFGSVQALPQGIAPSSTISPPAAPAPTDKQTYLFRDLFTAPTAIKRFQRLLTQDEKLLTGEDLKKLTVFSFNNGTNSTGGVTKAANIDSFPILTGLGISTTLGFLAPCGINTPHVHPRATEFLTLVEGSNLKFGYVLENNLVKAGQNPEIAGALNKFEGTVFPQGSIHFQFNDNCEAATFVAALNSEDPGTSQVAQNFFALNSGVVNATLGFPKTIDGKNIEEFRNAIPANLALDVKVCMARCKKE
g535.t1	MADSIKDEIATIEKKIEELQAQLVDAKSRLQKSQNESTVSDESAKMSDQDKMDLIKVNLKEVLNPEIMEAALKEGRPLKVYWGTATTGRPHCGYFVPILKLAQFLAAGCHVKILLADIHGFLDNLKAPIELVKFRAEYYRFTITALLKAVNVPIDRLEFVLGSSYELKPDYMMDVLRLASITSEHDAKKAGAEVVKQTENAPLSGLLYPLMQALDEQYLDVDMQFGGVDQRKIFALAKDILPKIGYKERAHCMNPMVPGLQGGKMSASDPDSKIDVLDSEEVVKRKLKKAHAAPKVIEENGILSFVEYVLLPASYLRHGTPKFVVERRDAEPLEYTTIEQMHADYKADILSPQILKPAVVEALNALLAPVQQEFQNSAEWKEIEQKAYPPPPTEKKKEK…
g536.t1	MAPAAAKKQPQWSTDFDTKRRQHLFRNPPKDKTAYPTLAAAVDPHINSFNAIFAPGGQIEEGIKDIGIKSFTDGDPYAQPENIGRRNRLSVRIQDVFLDKAVLPPSNKVALKNRNILPAECRERHATYRGKLRARLEYRVNNEDWQEEVCDLGTVPIMLRSNRCHLQNMSPDQLVKAKEETEELGGYFIVNGIEKIIRMLQVNRRNYPMAIKRGAFTNRGPGYTPYGIQIRSIRTDQSSQTNALHYLSDGNVNFRFSWRKAEYLVPVMMVMKALVETNDRDIFEGIVGAAGSKGLAEKQFVTDRVELLLRTYKVYGLHSQAKTRAYLGSKFKVVLQLPDDASDDEAGVEFLRRIVLPHLGAYNVTPAQNADKFQMILFMIRKLYSLVEGECAVDNPDAV…
g537.t1	MASIFRRIYDWLLRLFWATEMDITMIGLQNAGKTSLLRVLAGGEFTVDSIPTVGFNMKRVQKGHVTLKCWDLGGQPRFRSMWERYCRGVNAIVFIVDSADKGALPVAREELKLLLEKPALEGIPLLVLGNKSDLAGKLSVDELIDALNLKEVSHREVSCYGISAKEETNLDAVLQWLIARASK
g538.t1	MLSTSPTTARLLLFAALSTQITNAMAQSRCYYDRYNVRRCYPQSAWNSWVRWVVLAVVVGGFLLLFFLCSCITARRRRKAGRTPFYGTGWAARPGNSNAQPYYNNQTQAPAPPYSAATNNNNGYYGGGANQSYYGQQNGVELQSPQPTYGGNQQYAPPPGPPPGKDGMIR
g539.t1	MEKFKTKLQHLRRKPLPDHLMEPKLNLPNGFSHWAVAFIVCNFNVDVGPEIEILYPPTAAFSTADLTAICFNSFPEQQNTETAEDLAFNFTVTNNSPDIKLNSPNTPHGSADLLFASCVFRQEFDDTMKRSFNQRTLVLVSHHNFTSFNNRIVQVMTESGVISDPTTLEGAHAQMNNWSPPSIGRHELPFLGRVLTLDIAPHPSFPLQGLAGPTPLVADPHPSIYAYEPVGSWDTIMNFMPCITDLYVLYEKLVLCESVIVVAKSPQLASESVSSLLDIIKPVPYAGVVKPYMTMQADFSSIGIDGGTPRPFIIGITNPFLLKRIVAAAEKTQGMRPHILYLQNFDGPVPTRRHHSLHHKSSRNVLLDLPGGGIEVHTPSKRFLKSDSAVINQIESVLK…
g540.t1	MDPNITKALNDKLYDKRKSGALELEGLIRDALVAQDHDRIAKIVHELCHHYAYAVHQPHARNGGLIGLAAASIALGPEVARYLEEIVPPVLACFSDSDARVRYYACESMYNIAKVAKGEILVYFNQVFDALCKLAADSELSVKNGAELLDRLVKDIVSESAASYISVLHHSDEPLGHPDESPEHPPSEVETAFNLERFLPLLEERINVINPFTRSFLVAWVTLLDSIPDLELIAHLPRFLGGLFKFLSDSNQDVYTMTQVALERFLNEIRKIARIKKGIAESKKSQSKDGRRQSTSSSACSDVGDESEVAENTPLEHRTSVDEGDQVSGESGSLSGDSGKSVNGDGDWIPGQDVHVDHPKILEILVGFLSSPSDMEEEQTEILLTALRWIDAFFEICPE…
g541.t1	MVLLTMTPAIVRALSRAEQLSPSEHARLQTPGDPTLASPVPGNPISHRQLLALSKLSHQLPCDTDRAEQGRRAPTALDALVRNTAVYVAPPPPRKQQTPAYLALMARLRAQEEARAYQRMLHPPPTRETFSQRFPASRAHLPDPFSIGVDEVDEVDDVSYEEVHRQIILIINVLVSVVCVAVFVWVAARRWSVGKRLGLSMVSALAVAVAEVVVYSGYVRKVQEAKLAEKKKPEIKEMVASWVLHRDGHGEEAVLSTSKEKPDDGPRYRKGKHR
g542.t1	MMRRSSRLATSFARTSTSTSTSTSTSTSTSTSTSTSTSTSTLTSTSTSTLTSTSTLTSTPTPTSRLSIATCPHHTAAFRAHEAHVSSHHAARRRSQSSWAAAAQAASVAQHIRAAPPPDAPLKMDPFQTVAREMKFLTGNIRSLLGSGHPTLDTVAKYYTQSEGKYVRPMLVLLMSRATALTPKAARRASGSSCVDHPITSPSTLNDDNPDASLSSLAHDTAYTANDSDILPSQRRLAEITELIHTASLLHDDVIDHSVARRGAASANTEFGNKMAVLAGDFLLGRASVALARLRDPEVTELLATVIANLVEGEFMQLKNTARDEKKPVWTEDTVTYYLQKTYLKSASLISKSCRAAAVLGGSTPDVVEASYQYGKNLGMAFQLVDDMLDYTISSEELG…
g543.t1	MDSLPKRSREETEDEYDDAPARKRSNSGSPRRLAERPARRYSRDHERDHDRDRDREHDDSADDQRYYDRRTPSQSRSQSSSRSRSRSRTPPPRKPTSLNYTPHLILRGHKRAVSCLKFSPNGLRIASASADATIKIWSASTGQLEHTLEGHLAGVNTLTWSPDSTTLASGSDDKSIRLWDISTGLAHPTPLIGHHNYVYSIAFSPKGNMLVSGSYDEAVFLWDVRAARVMRSLPAHSDPVSAVDFVCDGTLIVSCSHDGLIRVWDTSTGQCLRTLVHEDNAPVTSVRFSPNGKYILAHTLDSCLRLWDYTNGKGRCVKTYQGHSNGRFSLAGAFGTYSSPADPAQRFAFVASGSEDGTLVLWDVSSKDILQRLRGHDDAVLAVDTHPHGPVLATAGLDC…
g544.t1	MPDQKPTSLRVLSLNCWGLKYIATLRHERLTEIGRQIAAADPRPDIVGLQECWTQQDYDAIRELTKGILPYGKFYYSGCFGGGLAILSRWPIEESNMVRYPLNGRPAAFYRGDWFVGKGVACARIRIGPAPKDVAEVFTTHLHAPYEAEPHDSYICHRTAQAWEIAKLMRAASERGHLVIGMGDFNMIPMSLAHRIIETHAPVRDVWRILHPHSSHGAAKDKVEQLRGLPMPSAEFNVSVNGTTCDSAFNSWRWNEAHKKRLKKGENVQIDPAVDDPSAKRLDYIFFSSARHHDPKTGEETAEWELKEANVGMTMRHPTLHCSLSDHFSVECTLTRKHNAHAAHASDVVNRYLPIETYEEIIATLVKYMDRQRIQRKLRIGHFFFQLALWTACMIGVWW…
g545.t1	MRASTPLLSAKTLLALSAFTQIGVIADSSINVALRASFDPAPYLVELLETAAEENATAYFPLLDRISEGYLDELDTERQLYEKFVELLKSDGHITDPETLASFNLALSVRSAAPRIEAHYQFYKTSVEPSLESEQGKNCQLWVSLGSQQYCTPHIDDGEPIGSIKNERTHELPFDRVLGNSSALPTIVYADISAPRFKKFHKTVSKTAKEGKTSYRVRHKPSLKGPQTPLVVNGYGVELQLKRTDYIVIDDRQAAQDEKPADQKPIGTELDEEAADLKPLAKDDVAGLAEKAASFVLQSDQPMDTLLKLVRDFPKYTTTVAAANATADFLTEHYSNRELLLPTGYNVIWINGVQIPARDVNPYALLVHLRREKRLINGIRSQGLSGPDTISLLSHSAIA…
g546.t1	MSRTSTSIELQEYPRTPHTITQPSSIHQKENDALSLTEEVQPINTLRNAVSAELLGEPDKKTTAIVLLTVVCVTMISSMLSGVVAVALPSIAKELELGPDVLLWPISIYALTCGCTLLLLGSIADVVGSRPMYLIGCFLQSGFTLACGLAETSTQIIVFRGFAGIAISFCLPSAVRIITSTFPQGKSRNIAFASMGGGQPIGFSVGLVLGGVFAETIGWRWAFHISAIINSAVFVIALFGLPKVKDKKENVWSRIRNDIDWVGIVIGSASVALLSYCFSVISKSTGKIKEPETLSLLVLGFALIPSFILWVGRQEKLGRPAVIPNSLWRNRIFSVICIGVFVVWGVFNAIESWQTLFFQDVQEISPLQTSLRFLPTPIGGALSNVVMGLVAHRVRADWA…
g547.t1	MRGIVRYNGAPTGSLTTFAWDANSKDACVNVDYSLLKPHFKHSIFSPELQNPDLAVSIAKDSSNLFKWDIGLSSMHVIWDKPSLLQIAEGNATWESAENVYLLPDANKWVYWVIDTKLPVPYPIHLHGHDFYFLAQAASATYDSSVELNLNNPPRRDVATLLASGYLVIAFYTDNPGTWLHVAEGLALQFVEREGEICALFDTAALESTCKLWEDFNVEKFHIEQDDSGV
g548.t1	MSDPKRRRTGDEDISELRRNARQTYLAQREAQQLALLRRQVAEEAEEEERLGSKLSIEERKDFARNRETLRLAEARNAIDEHLDGYLLPDADLSRNTALTKRHNEREKGYDKSEVQLWEDEQLSKIKSQVKKAERVSADDYEFVFSNDMAINFQSDGMPDPDKALLEKQLKEAEQKVKTMEDVRKSLPIYAYRDELLSAAESHPVLIIVAETGSGKTTQVPQYLHESGFTKNGKIGCTQPRRVAAMSVAKRVSEEMGVRLGRECGYSVRFDSKITPEVTKVEYLTDGLMLKQLMSDPLLSEYTAVVLDEAHERSLATDLLMSLLKELVAVRPEFRLLVTSATLNATKFSEYFGGAPLFNIPGRTHPIERLYSSSPEANYLNAAVTTVFQIHLSQGPGDI…
g549.t1	MSALFPRAASRALRSSVRPALRAQRPTATFRRGLAVPAEQPRLRIGSIAPDFDAQTTHGKIKFHEFLNGKWTILFSHPADFTPVCTTELGAFAKLKDEFDARGVQMLGLSANDLSSHDQWVDDINETQNTTVKFPIIADADRKVAFLYDMIAQDDLDNIKEKGIAFTIRSVFIIDPAKKIRLKMDYPASTGRNTTEVLRVIDSLQTGDKKGVVTPINWTVGDDVIVPPSVSTEDARKKFGDVKEVKPYLRFTNVGK
g550.t1	MSVASSAPGTGGFLKFNNGPPKIFMTDSTPHPPEKALLSWKEEGYDVTYIQYEPSTQPAYIRTIKTLNDNLELGEHYALIAYGAAASVVLKTAMKPLNKCCAIVAFYPPVLPSAKASFPESSNPQVHVAGKSQTSPHPEMCQWKLYRYDNCATGFADPSSTAYSEVEANLAWSRALACVRKGFKKEVDLEPVVQSFWTAKYEDDVPERASMGVVKNMTQNSPHITILPTLQGGVGRKKLEEFYREFFVPSLVDDFRIRLVSRTMGVERIVDEMVVSFTHSDEVDWILPGVQPTDKFIEIPMVSIVAIRGGKLVSEHMYWDQASVLVQVGLLDPKLVPKKFKSEGTKQLPVAGAEAAKQLVEPQQGRYNKLLQMHGLFDGINGN
g551.t1	MDDSAFEVETDLSTQSILLAAAHHDIPALRNLLRNTSANVQDAETGFTPLHAAIAACEFDEDETPAAQENGESSDTKSGRKQDIEAAIKTIKLLFENGAIWNDLDSNGETPGCIAQRLGLTELYELCVDAGVRAELLLSRLDQYQLLGGDDSDEDEDEEEAEEEAQETAEDVEIIDMDISEEVAQGDESTENPNYLASNLTFDRDRLTDDAGNGVMMEWETTLMQRSAERLAPAPGLRVLNVGHGMGIIDGILQEKQPKAHHIIEAHPDVLKRMKEQAWDKKPGVVIHEGRWQDIVPGLVEKGELFDGIYFDTFAEEYKDLREFFTEYVIGLLDPSGGPDGGGGKFGFFNGMGADRQIVYDVYGKIVEMDLFEAGFDTEWETIQVPYLDEQGEWEGVRR…
g552.t1	MMAEQIRTGACLCKKITFRVEGEELNFAICHCTNCRRNCGATYTANAWFPDKVLFFSSLEVSTLTRLKQFEWTTGEDLLKQYDDRDTETSEVVHRWFCTDCGSPMMTKSPRMPGITIVPSGVFDGQHNWKPSYEQWRQSKVCFVEPIRAVKDKSRYDQHPDLNEFEDIWGKSGARPAQEFIDR
g553.t1	MPIKTWLTETLGIRVPLVQGGMMWVGKAEMISAVANAGALGFLTALTQPTPEALRQEIRRTKSMLKPSAVQFGVNITLLPSMNAPDYAAYARVVVEEGIKIVETAGDPTPVLKYLKDNGVTVFHKCVTLKHALRAEKLGVDCISIDGIECAGHGGEYDTTSLMLLSLCKEQLKIPYLASGGFANGRQLAAALVLGAVGVNMGTRWMCTVESPIHHNVKEAIVKASENDTVLVLRKFRNTSRLHKNKVSLEVHKIENEKKDVEFKDVAHLMSGKRGQGVYETGDVDAGVWSLGMCAGLIHDIPTCEELAKTMERDAIETLTQSNALIVKSAKL
g554.t1	MKCLISLLSLVAVLPAVQGIVFGGPAPTAATLKRALDSALPKPTIAPTNDELKKRQTNLHPETCGWVDGIYSSGVTCPGSRTCMLYTSAASGMAGCCDGANTIDCGWASSCVDAKAYRSEGCGSDCLLNSFIRKCTATTAPYCVTWLYPSNGVHDYGCAANSDSSVSTIFETATDAFGATTSMHLPTVTANAVSTDVPGSTTRKTAKKVAIGLIIGVVVAVLFVLFCVVIGIVFCIKKKKKQRQIAASTQAMAAVHATRPQSQYPPNQQQYPYLPTQQQQQAPVQTQMQQPSPFHPLIDPQSPASATTSYFAHGAHEEKPNAHTSVQEYAMTPISSPSTPAPVYTQPHVVPPPMPVPVVSQYRAPTEAHEVDAISVPHAPNQAGPVHEMGNGK
g555.t1	MAVAPAQPGTGASLQPLGAPDPTKLQRVREVFAQPVLASFVAGGVAGAVSRTVVSPLERLKILFQVQSVGREEYKMSVPKALAKMWREEGWRGFMAGNGTNCIRIVPYSAVQFSAYNVYKRFFESEPGAPLGAYQRLLCGGLAGVTSVSFTYPLDIVRTRLSIQSASFSSLQREEGKKLPGMWTLLTNMYKTEGGLPALYRGIIPTVAGVAPYVGLNFMVYEIARTQFTHEGDKDPGALGKLGAGAVSGAVAQTITYPFDVLRRRFQINTMSGMGYKYAGIGDAIKQIVMTEGIKGLYKGIVPNLLKVAPSMASSWLSFEMTRDMLMGSWNSGFL
g556.t1	MACVHVDAPELRPPGANQSVYREDCTQCFDSIDDPTGLDVCLYCFNGGCTADRSHSILHVSATNHPLVLNIKRTRKQVARDEPPAKMTKLSIAAETETDRYDTTTTVKCYECGVDEVDKSSGKLPGLVDAVLKANTFARQEEVKAWEQEMTACEHTLCLEQQEARQIESGALGHCSECELNENLWLCLSCGNLGCGRQQFGGVGGNSHAVGHTKSTGHPVAVKLGSLTADGTADIYCYACDEERVDPELPNHLAHWGINIKDRVKTEKSLTEMQVEQNLRWEFSMTTEDGRELKPLFGSDFTGLKNLGNSCYLNSTLQALFAIPEFRDRYYLPEQGPPDAPLPAEDLETQLRKVADGLISGRYSKPDSDVIASEDTPEVPHQRGLAPAMLKHLIGRGHA…
g557.t1	MFRRVAAAVPAQAGRVLATAARPSITSPIRTAAPALSAAGRRQYHEKDKSLFCATRPRNVGSMSKTDTDVGTGLVGAPACGDVMKLQIRVDPNNNTISDVKFKTFGCGSAIASSSYLTELVRGMTLEDASRIKNTEIAKELCLPPVKLHCSMLAEDAIKSAISNYYTKNPNARATDLGGKSAPLPKVEVETVSAA
g558.t1	MTTNDTECRQSIIPHALDDLSNTQRLEREDSWTPDDSSDISDIDGATQLRATTGTDTAGNRSGNTTAIPSDGSEDGTYDDRDQDKYKKKESIQVLIDSPGKKTQHRLTAEDFREIVRSGMQKEVEKLSGKSKARLRDLVFTRQFTTFDRQNPSASQSPFHGFFTLFWIAMALLLTRIAAWNYKEQGSVFGNAEILHLMVDRDLFVLLATDATMCAATSFGFFLHKAIAANYLSWSGSGWIIQSVWQAFFTGFVIFWTFWREWPWTHTVFIVLHVFVLLMKQHAYSFYNGYLSRVYCRRNLLDQKIRQLDDLDAHQGPSPTSPSTETLAATGIDHNDNNDMSCRKSRGPKFSTDFSTEESQIASIGQAIETSEPLDAEQISTFRRILTTEVTVLDEELRG…
g559.t1	MARRHGYNRSSTCFRPSIYDDYALSDYACLVVFLAVYLGTLITLCIVRRGTGAGKHLIGLPYMLALSFKFIQQAINFVSSTLQACEVTYGSTDVYSWIIAINVFYGLETIMLLFVVLWTLNTMLRKQLGHNPSALRMGLIAVLTILGILNAVSVILYSYTSWLSRDYRNLVDFNYTAVYYVDLAFWSVYLASILASATLSLLAVRSPKTKRVAGGLLVLWASILYLSLFVYSLIPVIRSSVLFIPQGQISRAGYLAMYWISSLFHALVFISIIGIAKDGTWRPNTFAATGAPVEREHDAYDHQQDPVYDGAGQRA
g560.t1	MDDILQAQFDRVEQALSTLVDSIASYNPNPQAAIDLVAADDELSHGLDQLARHQANHARIQTLRAEADALEEQLKSSVAALAGLRKELSETPATVFPEDSRPVPFDELLGYAKNISKYTVPPTFRERVPEPELESHKDKDAFEGSASAPATNGVNTPTTAAAAVEAPKGNIEPPKEGAGTDAAAPEITAEEEEWLKKLKDSGFAWFPWPDDAKIRRGNLWKVYHYREHGRNLDEFNIEAYEEEEKKKFLDAVQPQQAPEEMQAEPQFQEQRAQQAPQAQAAPAAPAGAGFTLFDDMESDED
g561.t1	MQSQNSRRNTDYQSHNDNMSRHRMPIASHEMHLLEHEHSPLKFARPRHADIPHRTEVGYVHYKAVMGVALANAVCEFRKELASRSAVEYLKLENEKLIVRYYSQSKLSQQELADLQKATHFDKKELQQWYKGFLKDCPSGMLTKEEFQKIYKQFFPFGDPSSFADYVFNVFDADKSGTIDFKEFICALSVTSRGKMEDKLDWAFQLYDIDGDGKISYEEMLAIVEAIYKMVGSMVKLPEDEDTPEKRVRKIFRMMDKDENGSLDMAEFKEGSKRDETIVSALSLYDGLV
g562.t1	MRRLDISVSGTVLASLLTLAPLPAAAFYFPGTAPTSYKVGDAVPLFVNHLTPADSQNDPKLRSVFSFDYYHEPFHFCQPKDGPKYIKESLGSILFGDRIQDSPFELKMGVNETCKALCGPQEYDSRDAVFVNSKIKQGYDLNWLIDGLPAAQLLKDPNSDLPFYSPGFALGLVDGENPIFNNHYDIVIDYHEAGPDNYRVVGVLVDPYSMKDPKQSECQSAQTPVILNEDKGDKVDFTYSVYWRLSPTPFATRWDKYLHVYDPRIHWFSLINSAVIVVFLVGMVSTILVRTLRKDIARYNRLDQFALDDFGDNGDVEDGVAEDSGWKLVHGDVFRPPKSPLFLSVLLGNGAQLFAMTALTIAFALLGFLSPSNRGALGTVIIIFYTLFGFIGGYVSSRI…
g563.t1	MGRITSAVQYALTHPILFIYQILQYILDILLSPTPPPPHAKLSRPKIAIIGAGLTGVSSASHCVGHGFDCRIFEAGSKSSVGGIWSKVNNTSGLQIHSIMYRFHPSVHWKKGYPDRKQIVSQITELWKKYGLEEKTHFDTKVERVYKDDQGRWIINDPSYGHFDGVIAAIGTCGDPKMPTLPGQEHFKGDIWHSSQLDGKSAKGKKVVIIGGGASAVEALEFVAASEAKHTTVLARSEKWIIPRNPLVDALLALNVFGSETIFSWIPEGILRHLFYRDLYDLSPPRDSGKGIFTETPMVNSQIFDLIRDDKASWLRGDTNGYSSSGTGISFTQRSRGVPKNGPGSEKLIDADIVIMATGYKRPSLGFLPDEVFSEPYDPPNWYLQVFPPGHPSICANNC…
g564.t1	MAFSQNNNSVEIRLCTAVNDAVRARNAVELASIVLLEPPFPPIYEELVQSLRNNYPQNANNSDSRLDQLVRKAVTETAEYQDEQGKPVQGWNAMVTFLVGWMTFLRDMDLDNLLHTYQGLKDLQERQANSALTHPIKGVLILPTIVNYARVFSRVALGLDKHPELIQHLLTSNDEGSRESLSEKAANVVRVAFTQCLNDRVGTQDKKLGIYKMANICLKILFQADKPESCETIFKNITNSSPPLHLYPKPEQVTYLYYLGRYHFANTNFYAAQLVLDHAYDLSSQRPQFIKQRRLILIYLIASNLILGRSPKQDIYALPEAQGLHAIFDPIAKAIKSGDLEKFRRITNTDLSDPSAGWLMKFRIFYQLGNYCEVLVWQSLFRTIYRLTGQEGGSTTNSA…
g565.t1	MGDTMKAVDVKNGKGPIDALHITDIPKPQLGKSQALVKVKAFGLNRMDLFQREGKYPVPPGASKILGVEFSGTIAELSAEGGGKEGFKEGDEVFGLAYGGAYAEYIAVSTHMLVRKPKELTWGQCAGIPETWITATQAMYLVGKYSAGKSILWHAAASSVSIAGIQLSLADQASAVYATARQDAKCDFAVKELGATAAFNTTTQDWADEVLKATDGKGVDIIVDFVGASYFQNNLKAVAKDGVIVNLGFMGGTQVPEGTDISAFIMKRCTFVGSSLRSRDEDYQGKLRDQLVEHALPKFKDGSFKLFIEKVLPWEQIQDAHRLMEENKTKGKVICTIS
g566.t1	MAEQAITQGAIKSIFEPSGCFVEHPVLQCVQIKTMEPKAGDANPVQRFRVVLSDVRNFIQTMIATTANEIVTSGRLKKGSIVRLLKYNPQQVKDKNILIIMELDVLEQYGELEKIGQPEALDTKPKQQPAAISGNNFYGNKPAPAPAPAPQQQQRSLPVHQSNPSTSTHPHLYPIESLSPYAHKWTIRARCTHKGEMKEWHNAKGTGKLFSVNLLDDTGEIRATAFTEVAERLYPIFEEGVVYYISAPCRVTLAKKQFSNLPNDYELQFERDTEVEKAEDQDNKPQIRFNFTKIGELNSVEKDTTIDTIGVLKEVGEVTTITSKNTNKDFSKRELTLADDSQTSVRLTIWGKTAESFEAPLESIVAFKGVKVSDFGGRSLSLLSSGSMMLDPDIDEAHK…
g567.t1	MADSEIATRAPESDAQEKSVEKSADQSSERPEGAEQSVFPGDTPAQTGPTMGEHCTTDRPTPAGEVPTGELTTLGGVECYITKPSDYPHAPSKLLLLLTGGTGVKSTNNQLQADKYASEGYLVVMPDQFGGEPATSTVSMEEVTEKTSWLDTIKLRAAEGIKAFTIDMWLARHTPEKVLPILHKVVEGAKEEFADAVANGGGVYGVGYCFGAKYILMLAGELPETVGWGQAASGDEEQGTVKKAPVLKAGAVAHGTMVSKEDLDAVRSPVYIAAVKDDPLFSEDEVLTPGRRALETNHVEHEVQIFDGVPHGFAVYGDYEDPKIKHEQSQAFGQMLSWIQGH
g568.t1	MDIDDLLAEVAVNSTPQESRDLQELTRAWVAERTAPEILTWPEDLMDRVLERIRRQIELVEEQTGSMDPKTNFKLIVIQTELERFKFLVRSFLRARLKKIDQHPLHIRVQHTASLDALQPLLSPAELQYLTSHQALLSQHYTASFLSQFPASLQRLDDTTGGISMVDRPDEDKAVFVRALRDIGTVFIEGTDRRLQVKRGDVWVVRWSAVKKWAVGSGTGDVELI
g569.t1	MEMSSPLAAMHPPAAIPGPWGYRRDLPPSKPLFGAHALGPKNFNFRDMSMRKGGMDYFAIQPMRGSSPTASLAADMSSNLHVDQRYARPCMSNPPIVRLLIFFFVSPQLATPRRSLFTSSLFQQVDAQAAEGVTTPPVRWEGVTTPPIPDSSPSFVPDSMDISPLPHKAPFHYITLPSPSPEVMHGDGDDMLSPSELPQLSANNFDIPRPSSAADRKKSILLRPSLSRTKNFSTNTVSFKQQEQQPCPPFRFGAGCDGFGNIGNTSSPSLDECFAPSPPQERRPCSNGSLFASSKAKPFPFGSNLQSRNNGSPLAAIRKQSAAHSRPRPSKMRRSLSMFEHPGDVMNAKQDGDESHSPSGLSSVMDTEESPLLKLPHFTPSEPESLPRIDHATLIQVLD…
g570.t1	MLEIELRIDIAIATAPFNVISIEVDVDEPMAQFAILALPVCGLIRADNAQLVTMGDLATKTNVDSIWGSGLPVEAVAIAAELKKGRSRTRAFPNPPSKPLHKSLHNGYHHHFQFGPHQPVTPLLWTLRL
g571.t1	MGSKNRKREREPVQAENVEEVPAKRRRQLNEEHLKLSKLYEDLAAESDEVRFEAAKQLIVKFSPESEPAAKDVETAMVRLIKGLCSQRKAARVGFSLTLTELLRQIFGGVKIEGLDHDVTSIVKMVDEKTEIEGNVPGRARRDHLIGKLFGYKAIMQSSVVIEPQLSMECWNKLLDHIYGMARDIPWLREECGMVLVEAVKSLKAQPQFEQCAEEAIKRLTPFKLVSTPQGVAVWLTVRASYEKVLPEGVWHQKDPLSRKERPRLAKLLKEDFHVDSESAKDEKAIKSAAANPNPTFAWDLVFGEILRRDEENKGSAKEPPKAEFPQLWIDIVDNNLFSTTSSHERKSWGFKLFSNMITRVPAWAVPALFSPNLMRTVINQSKKDDRFLHTAALAALKS…
g572.t1	MAELTPSPDISPVSAATTNGLFPQDSFCLNLSALPDTSNFMLKSALRSPYLLDSPNGFYFGGGGLSNSYRKRPRNMSQSSGTDRDMSTNGTPPATNQASTRALSNGTSSEQRPSNKKRPSTDTVDYPRRRATIACEICRSRKSRCDGTRPKCRLCTELNAECIYREPGIKLDAGDKLILEHLSRIEGLLQTNLAGTFSLATHSPTTSNSTSEDFLGRSNGHMPNLAMVQPINGIGTWTNHPSNISTMPKTHNTAALNLLSSPMIRELVSRPYDPKILLQLEMSREPISLGTTRGLDLSNTGPHVQAYFERVNVFYACVNPYTWSSYYQTALAHGFRGGPESCIVLLVLALGHAGSTGSITLQNPEKEPPGLPYFAAAWDLLPSVMTRNNMVAAQCQILA…
g573.t1	MDAFVSQKRKRVEVTQSVAPPQVTPPQRSSTPEQEEESTDIKLALLASLHPAVDEATLLEALLASDGHVDQASASITQSTLASPRKRSANAAIGYQSSLSLYRLNSEGGGPAKKPLVKKGKTLCLFSPEDIEQHTPCSIIHNFLPPQQANALLQQLIDETPTYQRLEFKLFDRVVTSSSTFSFYVNSLAEAEEQKTEYIYDGRKVENVQQSLPEMLRAVPQVEATVNREIERRIRDFYPCSKKLKYQSPHPWKANTAFVNCYDGPQEHVGYHADQLTYLGPRAVIGSLSLGVAREFRVRRIHAEDDKYRKDDGSLADAQGQISIHLPHNSLLVMHAEMQEEWKHSIAPAQAIDPHPLAKNKRLNITYRFYKDSLHPRYTPECRCGVPTVLRCATRKKKS…
g574.t1	MLEFRTQGYNGYSVKYSPFFDSRIAVASSANFGLVGNGRLYILGLTANGIVAEKWFDTQDSLFDIAWSEAHESQILTAGGDGSVKLFDINVAQFPVQSWTEHAREVFSVHWNLVSKDTFLSSSWDGTIKIWNPNHNASITTLPTHSCTYSAQFSPHAPSIVSSVSSDSHLRVFDLRTPASASNHLTLNIPIHTPPKPRMGAAAPVGVPPSEALTHDWNKYRDSIVATAGVDRLIRTFDIRMPGAGPIAVLPGHEYAVRRLTWSPHLSDILLSASYDMTCRVWTDGSAMGAGTMKQENMLDDPMVHGGGREMGRMGRHTEFVTGVDWCLFGAEGWCASTGWDERVMIWDARAIMR
g575.t1	MSVIYKRTERERERDWDTQSQGGARSYTTVRRYKVPEYSLEEDTYEQEMRLVRRPRGEYEERRDVRKELIVERDQPARSEVREYRYSDRSPSPPRREVREYRIEREMDRSPSPARSSAREIRISREYERDLQEQRQDYQPYELERYSRSTEFFRPEPPPQQAPQPIIIRNEAPPAQQPIIIREEVPQPIIIRERIQEPAYELVERAEVYEDRQVARPRVDEDYYYERRVKEVDRGGRRDERYFDEREYGRDRRGEQNYYSDDDAVYVHEEKDTWGRDGSPNGKRSAAAGALAGVAAGQIIRHHRKRKGEEPGGNVGNALGYGALGAVGAVALDRYNNRDRSRSLSSDRGRQRRHRSTSRNRSKSRVKEVVTLAALAGVGLAAYAVGKHSKEKNAPVTTT…
g576.t1	MLSRRIFRQLTDSVLLESSLLPKRSFCPVAVCVSCSFGGRATAPRARHASSSSTRWKTRQGNDHFAREARVQGLKSRAAFKLLELNEKHKLFKPGQTVVDLGFAPGSWSQVAVNRTTPDGRVIGIDLIPAQPPRGVSTIQGNFLSPAIQDEVRAYVRDPNLGRPRKQTISEEPGGLTEEQMDEIERGYIDIERQARMEGVEMEQLRQPTEGSESVPDAKRSLKERDAREGRVVDVVLSDMSEPWDQVAGLYKKSLSDPYFRMMNTSGNPFRDHAGSMDLCMAALTFSFDTLKTGGHFLCKFYQGSEEKAFETKLKRLFAKVSREKPESSRSASKEAYFVALRRKETVTREEVFRE
g577.t1	MYGMNQAYNAGGGDPSAQVPNHLLAHVHLVSSYRFPVLPQLRPEQAVEYLIKGPQIVRDTSPVAWTYFASPPQDGTVVLTWQPPRMGTHFASDGMVWADPESAFDMPVRGYTLQVLVHSTGYHYPHEPFAMHSRFRYRLTAGPGTIDPNLWLVHYKPAEQQNRLAAGQIPVPRETQATLQMRAQLQAAGPLMRKEFMLHDASNWPKVEFGQQAAMRPQQQPYYNPMQPGRPYVAQPPPAKRMRGATPAQPRPQVSGAVLPDTSLEDEENATQDAFDFLTPREISLSRYKQHHEWTEEIFSSPYAVGSIAPIDLGLGLMGELAPLTADILDAAGAENPDTAKENYRIKDYYKLNPEKLKDFEKRVAEYTESEQAEIEKMKADHARKMAQLKRTRTYIKAE…
g578.t1	MAIIAFAQAFQLLLVIGLLCSLTDSKTLVSHPRRHAVTSIQTLSRRQNATADFYPILGVVGLGINTTYARLEIRELQRKPDLFNVYLLGLQRWQNTSQDDKLSYFQVAGIHGRPFSPWDGVPGRTQPPEGYKEGYCHHSSNLFPTWHRPFLALVEERVHHHASEVIAEFPEGDLKTRMTSALPALRLPYWDAAAVPPIGTGSYPWSVQRKTIEVELPDGSGSVKTTISNPLYSYTFHPLPGKDMFGKLPWTQWHTTIRYPSDRTAAAQSQDSKIASQLDLNLVNLRQRTYQMMAMQKDYHNISNNMVSLGGVLDSLESVHDTIHNTVGSSGPGHMTNAAYSAFDPIFWLLHANVDRMTTIWQALNPDSWVTNHSNPTATFTSEAGAYADENTPLHPFHR…
g579.t1	MDRVRPQPAPARGRRRSIFTEVGLIDEHTISKERSPAPILVTEHALRHVRPSRTVRFRSRNSIFGGNDGIDKVDDHDHDHDHDHDHDNDIDDSDGPRPSSTCSITHTSSSSRLYRAGLFTIVLALMLPIIQMISVAPFGVHGISIPWASITALADRSTLVERADSQTDVCKRWSGQSAIVNGTLYMYGFRTTTDAQQKSNTWTNDFLSLDLTKSWQISNPSLTGMPQPSGPPALSLGYLYSSHNSLWLYGGQYSDSPAEKPGPNSVWEYNIGSKSWVEHKDPKSSAGTNAEGDGQSIQRAAEGAGFGVTALGRGWYFGGHLDDFTTEGWSNQIARVYLKSLLEITFPGHSNDAVESLKDGKKAETDPVYRNITTGGIQDTGSFPERADGVLTYVPGFGN…
g580.t1	MKFSATISAALLASGVVAAPTPGLVSSILGLLTNDLNQLLNSLGIKIQVNGYQHGATVKYHSQCPFTINPVPVVNKTNSHDLSFPKSSGFIDWKTFKANGANLGGWLEKEQTHDPIWWSAVGGDGAPDEWTLCQNLGSKCGPALEERYASFLNTTTIDQMAAVGVNTLRIPTTYAAWVQVPGSALYHGNQQQYLKTISDYAINKYGMHIIIGLHSLPGGVNNLDIGEALMHDGWFYNSTNLDYSFRAVDGILNFIKNSGQMSSYTIAPINEASDNLAGFGTPAGLSVNATNWINTYHSGVLKKIAKVDARIPMMIQDCFQGASYWSPFYPDGTNIVFDSHVYYFAAAGAYSQYINPAICGQATYLAEETKFPVFVGEWSLQTMYNNTLASRKALFDTQR…
g581.t1	MRFGQQLKQSLNKDWLFYYIDYEDLKTALRVHHTWDEKSEQSFVEQLEKELDKVYSFVRVKSEEIIRRIAASEKEVNSAVARSQQHLQSQQAAQDEDPFEEDFDLLEEDLSDVIADVHDLAKFTQLNYTGFQKIIKKHDKNTRWMLKPVFAARLKRKPFFQDNYDNYVVKLSKLYDIVRTRGNPVKGDSSAGGKQQNFVRQTTKYWVHPDNIVELKLIILKHLPVLVFNPNKEFNEEDASITSIYFDNTDTWELYEGRLKKTEGAEAIRLRWYGGMNSDTIFIERKTHREDWTGEESVKARFKLKEKNVNDYLKGKLLPSKIFEKERREQKRPEKDIASDEQLAREIQYRVIDRSLVPVTRSFYHRTAFQLPGDARVRISLDTELTMTREDNLDGKKRA…
g582.t1	MSLQLPQESPSRPLSIRTTGTSATMADKTGETWRSAVDKHNCWEDLILTLDGGGIRGYSSLIIIQRLMHEVAQCERRLQEEEGPVPGSNRREFDEDALLPCHYFDYMYGTSTGGLISVMLARLRMTVPQCLEIYRRVGHELFGHRRNTLPLATKYHHKPLEKAVCEIVGQYCKLHPNCDGKDWHPWDWDPVDEEPSRLSAASTVNSSSTFKSSYTDAPIQPVDRICQSICLTATHNGQIDEAYLLRSYNHRYDQDILPPWVRPYNEGADKLKIWQVTRATSAAPFYFDMLVADLGKKRGRKGFKDGGIRENNPSYAAYSEHASLRGDEHEPALLLSIGTGRPNSNNDGFAAVWPGPLGKIPLLQKWSEKFAVFKNVLIKYTEGEARHKTMRSIAKGEHR…
g583.t1	MPVDAVRRRSAPDRSSSILDKEKEGFGQSGTGLAGLAGLAGRVTPAGGVGVTSQQLRALAWLATGQRRGQNQSPGRRRASDAGCCRSSHGVCPSSLHQGGSHAASQHPRQLSMVSGRRDAMPLPTAAAPVLAARVHGESFSRVTSSLDERPNAI
g584.t1	MTFKSTSTSGTTSSKASSLFDLDENSNKSILVYKYRSDAKGLESTTEGALCAELDKHPSLPFMRVTRKPIPRGASRMDIYQEDLYLPEERDQYADKISPKSSVANVGLPTMAKWKHMVMGSYDDLYIVFQTHTLTPESSKNNSPESSQHVTPAGTFPLER
g585.t1	MFESLLSEKFSHGFDIVLGLALLLSSLFTIILLTLPSQYDPYMDRPRKVVDEEGKEVKVNGKDGRDPLDFKQGRTAQIVVLGDIGRSPRMQYHALSIAKHGGRVFLIGYQESEIHPDIVSSPLIEVVPLVPAPSFLRSSSKLLFPILAPLKVLWQVRSLYRALCYRSQPGRWMLVQNPPSIPTLAVASLVCLIRNTELVIDWHNFGYSILALKLGNSHPLVKISALYERVFAKAAKHHFTVTHAMARVLKDSYGVTAQALHDRPGPMFRPIDSQERSEFLSRLPETAQYAEDLTASTKTPWKLIVSSTSWTADEDFSLLLEALCTYSAQVAAKTNLPNILAIITGKGPQKEHYLSKIRALNQEKKLLNVVIQTAWLTTSDYAMLLAAADLGVSLHTSSS…
g586.t1	MASTYALPIAPTSHSHSHGRSQSQSQSQSQSQSQSQSQSPSQSQSQSPSQSQSQSHYFTAPSPNRSGRPKALSPVEEGKNPTSGHQHHRPDMSGQLYGAVRSPYAEYNSNAHNHSHGHSHSHSHAHSNSNGSSHTLASFANGRPNGRLGVDSPQTPRKNAAAAKYGLFSPVQESAPVLPSSSWLDLPEALTALLIPLPYLLATVAYPNAARKLPTTRSEAVVESEPALQVDTATNDAHLLHALFLTSATLLAVGLTARVRSGLDQPLDRRKADSSRSIAAALRDGAGLRQSLTNVSGVLLPFYAAMQIGGAKTALVLLTAVAAGLGATDQRPGKHTRWDDLKRTLRTRRTTVAVLLIGVIVDVTLWGHPACALFGYSALFTSIFAAPPPLPTAGWLLVT…
g587.t1	MDSDSSITTPAVMSLTRFAFRAPAVASRSSLRCFSSGPQKQDTALLSILDGSATRNPPANQQQPGSSSLATRLARDAGLDRPTQTREMIESERRSQFQRQMYRKWQPGDVYSPHDLTGAEQRKWKFGRKKPQSDAFDVLGINPINEYKNYTIMSEYMTEMGRIKHSNDTGLRPKNQRKIAKAIRRAIGLGLMPSVHRHPLVVKKSSPSRFL
g588.t1	MPSHLTRVVFRSIIANEPLLYRGCRHRALRPCAMTHHAARALPQSHRRTFFGGLFKSERKIKKMDMPTGLETMSELSHAQQTSARPPAPKDIAEALKSFFTSKKGAFEDFHVGLAHNAFKYLLENPKEGGDQWFTKRELSALIDELVHFRRRPETGGKPHVQFGSALIDQITKMEDSEMATGAAEATSKGAKISKEDEYDCFIRPKFVHLLALYGATSQAREIAIQFYNDYSTIPEIKKKSRRYVWNQVLAGAARENNTDEMAKTTELFNKSSVPLTDITQSVLVSFFSRKQQLDMAKFWYAQPIVTESGKATNIRSATYTALLIGCALGGDLTFGQEVVSGLTKGKVPDKKGWDAIFLWSAAIGKGVDEVERMMNVMVRRTEEAQSNGSGVHAQYPDV…
g589.t1	MASHENQPLLSPSFSQTDSTKTSVESDDAQLPHEPIRSIEDDVLPETSTLGRTISWSSAYILVISRVIGSGIFATPGVIVKAVGSVGLSLSLWVLGAVIAACGLAVALEYGCMLPRSGGEKVYLEFTYRKPRYLASTLMAVQAVLLGFTASNCIVFAQYTLYAFDIEPTDFLRKSLAVGLLTAITIVHGCFRKTGIAIQNFLGWIKVGLVVFMIFSGLFVVVFKPQGLDGRRSHFPAGADVWKDTEWGWGTISTALFKVFYSYAGLNNVNNVLNEVRNPVRTLKSVSITALVTACILYSLVNIAYFIVIPLDEIKESKELIAALFFEKLFGATIGKVILPLAVALSGVGNVMVVTFALQARLNQEIARQGFLPFPDLLASSKPFNAPLGGLVVHYIPSL…
g590.t1	MNTNADRDFHHPYEPYDIQKQFMNAVYDCLEDSKVGIFESPTGTGKSLSLICGSLTWLRDHKRRNFEDGFEIDTTSIDDPPWMLEHARNQRKQDAFRRRQELNDRLAKIKAKEKRTKERSAAGGSVYKRQKVDSDDASEKGAESQFALEDYDSDTERGSDAKVDMFSSSGLSAETQALMNKLGFDVGEKKAENSDVLDETKIFFCSRTHSQLTQFSNELARVKMPPALLLDDKSDSADVGEFTEDVKHLTLGSRKNLCINPKVSRLGNATAINERCLELQKSTSSESKCPALPTKDNEALLNDFRDHALARIHDIEDLGALGKKLGICPYYASRPATKFCEIITLPYPLLLQRSAREALGLSLKNHVVIIDEAHNLMDAIAGIHSVQVSLSQVQQARTQ…
g591.t1	MASSSSSRRTRDDEQRGAYTTVAQAEETAAELTAHGKELEQDERQDRDLESALYVGSKPTPEDLLFLPRVADKLPYGAFLVAIVELCERFAYYGLAGPFQNYMANSYHDANGLPGALGLSQSRATALSNFFQFWCYVTPILGAVVADQYLGRYLTIKWFSLVYMAGIAVLFVTSLPWSIERGAAFPGLLAAMVIIGLGTGGIKSNVSPLIAEQVRSTSAFVETRRDGEKVIVDPEITVQRIYMIYYMCINFGSVSAIATTLLELHVGFWSAYLLPLIMFCVGYAVLVWGKDRYIIKPPQGGVIGSCFSALWIAARNGFDIDTARPSAPLNRARVVSWDDSFIDELKTALLACKVFLFFPIYWVAYSQMLNNFVSQAGQMQLHGLPNDILPNIDPITIIL…
g592.t1	MANTNILGLTLTLTPAALTALRIAPLIGSTASLTHAYMEWLVTTSFLSPAPIHSATSRFVLGLNALPSPPAVSGQKPNPEEVSQTYAELEHAMQVVVPHWFTTFFNTALYSVVGFNTFTLVSASLNLLVSSSQSGGEESMRFYGIGLVAAATHYAFVPLVGWSVKALIGLCAGRIQGSGEAGREKKAVEWMREWVGWHRIRMATVDTIAWACFAWGVIEALTV
g593.t1	MPAMSRGATGKPSAKPARPGARSSSKPSSKVRAPKRTKGGTQSSRNHRFKGFSQRIAELKIEPVRRGRNAIIDDAELESTFSYFRDSFLEWKELNLSENFVHFSRKVSPLCDSLPQVLHHSDRIIDLLVEFIEKGEKYSEEPLLSLLAHLAHDLGEQFEKHFERVVKTVAHLAATHAEIEVIEWSFTCLAWLFKYLSRLLVPDLRPTFDLISPLLGRAQQKAFVARFAAESLSFLVRKAGAAYHRDKTPLRLIVRRISGQLKELQDNEKDYEFQQGIMFLLADSLKGIHRGIHSSATAILQALLAEAYHDDYVSLQTPPLEPVLVGVVTAVIHHTDAENFNPLLDIILAQIQSASSHHAALSSRLLFIVCGVRRGSRVQDWKPVLASLDHVLSAAKNMA…
g594.t1	MASKIVVIGDVDGQFQPVFQKVNALHAKNNFAFALIVGNLFNSTQSSSDVAEPSVQSLVDGTIEVALPTYFVLGSHALPPAVVQKLQSSDDELCHNLHFLGKRTTMKTSEGIRIVALGGQMDPNIIAGQSKDKYPPFYGETDAKILRGATTADILITSDWPEGIQKRSKVEVGGEASPSTQQCIADLDIVLKPKYHFSASGGSFWEREPFFHTPSDDTDNLYPVTRFISLAAYGNPSKQKWIYAFSLDPAASNPVAPPSGSTVCPLVLSEKKRAAPGPREQALVYDDGNQGGRRSHKRRKGEPRGPLTAAECFFCLANENIAIHLVTSIGDSSYVTTARGPLSTSQTYPKLGFPCHMLIIPFSHQPTLAAMEEEERLATYAEMQKYRVAMNSMLNSVAG…
g595.t1	MKTAILTFALAALVSAAPAPLVPRAPPGVPTTAAAKTQLAGLTVAAQGPQTGYSRDLFPHWITQSGACNTREVVLARDGTNVVQDSSSCAATSGTWKSPYDGATWTAASDVDIDHLVPLSNAWKSGAASWTTARRQAFANDLTNPQLLAVTDEVNQAKGDSGPEEWKPSLTSYYCTYAKMWVRVKSVYSLTITSAEKTALTSMLNTC
g596.t1	MRLLALAAALAALAHAQNLDITVTTPVECVRKTQNGDSVQMKYKGTLTDGTEFDSNYGRGTPFEFKLGAGQVIEGWDKGLLGMCIGEGRKLIIPPGMAYGNQRVGPIPAGSTLVFETELLGIKGVEAEPKPIDAGNEPILPVKPTPTQLDEAPKSSDVAKEENMPTPPAEASSSVAFALPTAEPSNIASATGKHPLDGEDGKGECNLLGDFALIVQGALGLLAVSSLAVKRLREHPRRPMKIWFFDVSKQVFGSVLLHLANVLMSMLSSGQFDVQAQTQAVALTAVATEKGDEPNPCSFYLLNLAIDTTIGIPILVLLLKVLHRAFLLTPLASPPESIRSGNYGYPPRATWWLKQSIIYFLGLIGMKLCVLAIFALLPWIAWVGDWALRWTEGNTALQI…
g597.t1	MTSDSAVARWLDDTASRQPPDTLLHPGDEFPLRTFSNPPSASSLSDISSDDANDNAPRRAPKTTLRPADVAKLIHPPTPTAAAFGGMEPSTRRRSSSITGAAAAATSKKKERSHRRRRDDHIAEEGEDGSANASDSGSRSDSTDFELDDMSADGLEDDEETGLTKKVRRKNARRKRRNTLLDNRIVPDAGLTFTKEEKALADQSLYRSMLVNAVLICLWYLFSISISVYNKWMFKVEKGDGATQNIFPFPLFTTCLHMLVQFSLASLVLFLVPSLRPRHDSLNPHATGARAEPLDPKKPLMTKWFYFSRIGPCGVATGMDIGLGNTSLKFISLTFFTMCKSSALGFVLIFAFLFRLEQPSWRLVLIIAIMTVGVVMMVAGETAFHALGFILVMASACSS…
g598.t1	MAFLFRNKQKSNAELTRSTKDLTVRLSQEDKPNPKLEEELARDLQQMKLRLQGTPDTEVNPELVFQLLSAILSDDLLYTLAINIHKLPFESRKDAQVVFSSAFRYKPAGQTDPQVLHHIVQFRPDIIIALCRGYDRRESAMPCGGVLREALKYDAIAALLLYDEGDEEGKQLDLANVNPDIPATGNGIFWRFFDWIDKGAFELSADAFNTFREILTKHKPLVATFLQTNFELFFSKYNSMLISSESYVTKRQSIKLLGEILLDRANYSVMTQYVDSGEHLKIIMKLLRDDRRMINYEGFHVFKVFVANPNKSMAVQRILISNREKLLRFLPNFLDDRTEDEQFIDEKSFLIRQIEQLPSQPVPPTAAA
g599.t1	MLDCIKLILRRIDACHASNPLLSANDAHREAIVAETRIYDQAHSIDDYESSIDEKVASYPPRFLQFPTPEDTKYVPTPGAISVGMYQNALYYREGLFSAIYKAPALTEDGYFPPGAPSRAKFVALKITSPSMMEPPHDSRREAEILKKAACPNVIPLLDTFREDGSRFVLVFPFVPLDLSVVLREGKFAKTQTKVWLKDLFSALAFIHEQGIIHRDIKPSNILLKTLDGPAYLADFGIAWAPDCSGSEAPDSKITDVGTTCYRPPELLFGNKAYDCSLDLWAAGCTVAEILDPNHATLFDSGELGSDLALLQSIFKKLGTPTLSRWPVSVKPAHQRDEVADTNKEAAKFPDWGKVQFYEYPEEHWGTLLPRVSEEGQDLVSELVRYESGARLTALKVLE…
g600.t1	MELQRKEYPAVLQALSPAQAVDILNGRMRHVNQLNTQIADWLQERRRVEEQYVQSLRKLANRHPPDDASELGIFSVPWQKIVSATGAVAGSHEHLARKIESDVERPLRNFYASNREVQAMGNISGNLAAMAKDIDSARKKSEKLKAKGAKAKPSEVGEAAQEEQNAELQWDSQAPFVFEKLQAVDESRLNHLRDALTQFQTHEVDQVERSRITAEETLNVLLNIETADEIQTWSLRLRSGDIPQPSRKMSNPPASPARNLVPPPVPSAAGPADDARSQKSGSTQEKHSSNPLKRFGTVLGRRRQSAHPYGRASSPEQKSSSNLGSAFGFGKGKNKDRDLPPPSTSDRPRSPLRRLSSRRESESAPSPVHAPPSRDVDEPNGFATAASNEIETIATPVNG…
g601.t1	MTREHQPPPPPPPSQSTDVTASSTSSAANPHHISPNAPPRPLLPRLPRSAAVLRRSPADDPRSPGPRPEDDDDENASATETETDMSEDEIAPGNDTVRVQARSDVVPPGKGSPDEIEIERLRSLQLKILQQQQRARMRNVSGTAGTPGLGARRVSPIKEEPLSAMSPTLEGAFASTPSPLPTGATVSTESTESTESAKTIRGSMPPTPAGHVALRTPSYPFPTVPGTPRWAASFHMPFTSLSPTVSAIYSREWAVPKDRIASESSTPAASTTPFAPGERGAFFSEAEDPRYPSPNLYELVLQLGIEPGLVAWWTAVTTIVREHYGAERATLAVPADASDIENVPWGQKMTYTATLGDHSPRAATYQEAAIKSHPIRVQQPTPQMEERPPPTTIPERRPK…
g602.t1	MAVDNSLISLLATLTTSIQSATEALPRDDEILPPKEGISLLDVKNELLLSYLQNLVFLILLKLRARSSGGSDQLHPQDEVVQKLVELRIYLEKGVRPLENRLKYNIDKIIRSADDATRRTMQATAKPKARKSRNDTGSGSDASDAESAASDQTADSEDEMSFAPNRAAVIRAKAEVTSERARESAKDGIYRPPKITPMAMPTTESREARRDRRPNKSATLDEFIATELSSAPIAEASIGSTITHGGRHTKSEKERREENERREYEESNFTRLAPKSKKEQRKLDRGKTGGFGGEEWRALGAGIDRIERLTKKKGGNTKGSLEKSRKRPVEDGPRGSGSAAGDAFEKRRKIVGRYRK
g603.t1	MHSLRSLCTYLLLIATAAVVMTANPTSSHIFSCTGGSLYFTAHPTDIFLYQNPSLFHELYVYKCVTTVVFTSGDRGIVGNHSRSLEQGMEAAYSWMSGDNETWQTSTLRIGESDLKLSTHSEAFNMQIVYLRLPDGGPAGRGYEVHNRESLRKLYRGDIETIATTDGNATYTLESLKDLVAAILLESNATNVRVLDYKTGVPDDEDARYAGSFARRFDSNLNGLSLDFKRKVAAFFKYAEYDEHMCQSYDECLKYLKDDVQHRLFQDHDVLYAAEALEREYYVS
g604.t1	MCQFTYTHLECGHRKQDHIDTHLCEYFARKGIHCQPDNPKHRERGTTIITRKRNGICDKCIFEGGQKPEEDEKRREWEAKEQAAMLKEQQEAPIRDREAREAAERLQREETARLRKEEAKRKEDRERADHAEKARLAKEKARLAQEEADRKVAERLQKEEYDRERRHIADERAAAAERRRQEEEKQKKQEQAEEVRSRERRRQEKARLQEQLNKDVEAERQRIQREKAQKEAARRKKEEVEHQEELRRIKEEADRKRRQQAEEEEADRIQEEQAAARREKADREERERLSRRQAEDEEVERQRKAQLERNEALKRELQAEKDRKKQQQDAEHAERLAREKAEDDRVKRENEEMEQHLARQRASPERPATSPPPKPPFPTPRSPIDISKIVGNVGSPELS…
g605.t1	MASKLVPFACRSASRALRVQRPQWRAFSIFQPARSDSLMVHRDSPENNPSIPFKFSAQNEQLIKEIVSRYPSNYKKAAVMPLLDLGQRQHGFTSISVMNEVARLLEMPPMRVYEVATFYTMYNRTPVGKYHVQVCTTTPCMLRNSDSVMKACEDTLGIHHGQTTKDGLFTMTEVECLGACANAPMVQINDDFYEDLTYETTQSLLNALKHATETTGAQPGGPGLAGGSGAEQGSKGETALNSQGRGYAAGNVKVPSPGPLSGRQSCEPAGGLTALKGEFWGNETLRKDGALD
g606.t1	MTTADDGNAAPSFRFKRRKTTHTKRARTDDEVTVSLDTQSPDAVTPPIAPEAAQDEDESVPNLKEIIRNRKRPRDRLKDVARRTEAPQTQLVQSEAPRPGQYTSRFIAQTGQVVDSSDKQMTVYVEARLAEQNYRQYGWPIPRHLQSTVAAIAPDLKHTFTLSATQATAASSTKDENIEHNSRVAAGQGKLQEVDLGSHAASRTHKDWKQLEGEMPAPKVRLGRDGKPRRGPKRRTSDDIRRDQMVEAVLHEAKLEFFDEAPVNPRFAGTDDDMVERFRTEYFESIEERQQRKPALPPGAKDQPKGPKLGGSRSARAAMRQQEELAAKTKR
g607.t1	MPASVASAPVNRTSTKSAASRPKKAASTAGKKTQSTTNGASNGIQQHASPYTIMASRIANRVAEMAENMTFVERDRAPPQSEQKQVEKPAPATKKPPRKLEMRLPNSGASPTNITFSAPFLDNTLSKLLTLQNRMLTVSNDIAASEDVDDKTKQEQFAQSAELSRIIALICAEKARQGA
g608.t1	MSPAIKKKKDDLGAGLRVSKDNIAAHPAGPPKYGELTQAERAFTLASTFLSGVLAISASQFLGAPLKLIDPQFYEGYMAYTKECFAILITCLTQWWAPTVVRVSGDSSMVGQLIQKKDGSLQCNFADRMVLMANHQLYTDWLYIWWIAYTNNMHGFIYIILKESLRNIPIIGWSAQFYNFIFLARNWEEDQRRFKKALARLNSATQPMWLIIFPEGTNLSATTREKSKAWAAKNNLQDMKHQLLPRSTGLRFCLNELKDTTEWLYDCTIAYEGVPPGQFGQDIFTLRSTFFEGRPPKSVNMHWRRFHINDIPIQNTKAFEVWLRNRWREKDYMLEYFQKHSRFPAENFWKDHLDMGDRSSQGSQSIRSVPRPAVQIETEVKSGNWNEFVKIFAPISSVM…
g609.t1	MAGFIQNILWNSVEGFVDAAKKTGGEYAGNALIKAGDMIEGGGRSVGNGIEKTATGYGSKLSGQTYQPSSASKALPSTARKPMVKRSNSMPANTRPSGSVAGGRSIAGPTSNVPLGAKKTVGGAKKAVGGVAGGATRTVGGVTGTATKTAGGVTGGATKAIGGVTGGATRGVNGVVRGTSKGVNGIAGGATKTAGGAISRGSKPLGGVVNNATQGVGGIVNGSSKPITSIGSNAQKAVPQGMPKPYDSTSAGSSYTNPYPTAKKAAVKPGMGKPFTPPASISSEPKPYPGTNTLPGQGSKTPVRRTYKPAQTLGSQVAPGQKMTHIGSF
g610.t1	MTKFSRDADTPPASASEQDNEKSVAPSKIEDGTAQATASAASIDPEMEKRVRRKLDRNLIPLVSALYLLAFLDRSNIGNARIAGMEVDLDFQDGHYDWLLTIFYISYIVFGFSAIMWKVVPPHYWAAFCVFTWGLVSTVQAAANSWGAMMALRFIMGASEVAYGPGIPFLLSFFYLRSELGLRSGLFLSAAPLANTFSGALAYAITSGKPALAKWRVLFLVEGLPTVVMAVVAFFFLPDSPEKARFLNEEEKEVARARGVRQAGAATRLGAINIREFSTGLADPKGWILGLMYFSCNVGFSSLPVFLPTILKEMGFSSVHAQGLTAPPFFVSFLTVIATTYVADRTQQRGLMVASLTAIGGIGYIILATSHSVGARYFGIFLAAAGIFPAIGNILPWVM…
g611.t1	MGSDDIVDFEVIENSKENIQAIPSGRSARALAQLYTPPLGAKPGHAPSPLQSQDAHSATRLEFEKELMNIDDSDDPLDIYDRYVKWTLDAYPSAQNDKQSQLCPLLERATKAFQSSTHYKNDPRYLKLWLHYIRLFSDTPQEVFRFLARHSIGDGLALYYEEFAAWLEGAGRFSQAEEIYNMGIEREARPTERLVRKYGEFQHRLESRPQDVPEPSSPALPAIRPALAAKVDPFAPASPEPQAQSQPKAAKPKSGKPKMAIFSDEGEPARTSSSGSGKGWDSIGTVADRKKENAQEARPWAGETLKGGKTNKGAGKMMIFKDEVSSLPACPSSNIYDHRTNWLAFALCIQTKSYLEDETCKSHPLREQLQAVNPKTGRVEVVFVDLEQVYPNHEDPMSV…
g612.t1	MTADLTTILLQFQPEAAELKSRQKYDQAARQFVIQLNGTSASQWLKGADTPQDILNPAVHSIAYAFALRHRIAAAVDKKSPPDSVQPGGALWNKAVLFLETFDPVQMRYAGHEWKRVVDYVEPLARNAGSPSLAIAPIRSAMIRLDPTTGTFTSTHVDLIRLCLETRSYAAAEPILDNYIHSLPSQIPAAVREGLEYSVPCADVARSGEYINRSSGHSGRVVFADVQEYYILGAMAYLGLRQFKKAHHFLEHVLVMPSANVANGLMLEAYKKWVLLSCLVSGEAKQVPRSANATAMKQVRCASKAYEAVAEAYTQLSNPSKLKAQINAGAQTWAEDGNTGLVKAVLDSQTRAYVLRLSRTFSAMPVGNIARSVGGSAEETAQYLETLITDGYLNGRVEQ…
g613.t1	MKLDSSFRRPSRTGSVSSSLRSASLSRSLREGEVADTTPTQPPPALPSAPPSAPPPAQPPAQPPAPPPPTSSPRPRPHSSAAHNGAPQLPSLPPTLLGATVHEPSSPTSASTANSPSTAGLFTPTLFAAVQPTDYFNLKPRTPLTAQRPPSRTTLDRALGPEPLAEPAILAPVDLDARHAPGPRPTRAPSATRPPTASTRPRRSASKDHRRSESRDTHPRSDSRAHHRSTSRDHARTESTSARLDDAHHDALPRSRERREKDKKTMLSRALQKANTAVLLDNAQNFEGAMEAYEDACKLLQQVMIRSSQDDDRRKLDAIRVTYTNRIEELRRLDPGYTHGSGKSLPARPMSGESLDEQRSMLLEDDDDDDQDDDQDDPDPDHDHNDHDDDPAVIQAATT…
g614.t1	MPIALTYNEALLFHHFTTHLGRWMDCTNAARIFTLSVSEKARESPVLCHAVLCFAARHRRDDSTAEASYERCVNLLIGRLDGDSASYDDMLLAAVLLLHFAEQLNGKLPRAGRLDSLHLPLSSPHQLRLARQAPFERDFKYSPCFSEQFG
g615.t1	MASTTSPTPAPAPAPAAVERKQQHVLAANTSGTLQVALQNRTSSSNVFAYITGLSINDGNKPIFIQADGRTVYSPPSPAQPLADVAADVAIPLGAPGSTVAVTIPKIAGGRIWFVVDARLTFFVNPGPNIVNPSVTNPSDPNYNLNWTFAEFTYNDAQLFANISYVDFISIPVALTLTTTNSGTLSVPGMGSDGFQRVVDEMRAQTARDGKPWDQLIHNSTNNTPLRVLNPTNLLATNGNAWSNYWDGYVTAVWNKYRNEDLTINTQAAAGNLTGRVVNNQLQLGAAGSFSAPSSSDIFSCSTGPFQTGQNLARDGVIPRLAAAFNRSQLLNTPGNQFPNGGNPSMYYQDVTTNHYARAVHAVQRDGRGYAFPYDDVVPDGGRDVAGTLHAGDPVVFTV…
g616.t1	MSSSVFYKFKNSKEPERYAFDGNEISVFELKRAIIEASGMAKSTDLNLHIYHEDEPSKEYDDDTTTIPRTSTVIAVRRPAARGFSKIARYVSGKPPARAIKKDAAPVVAPRPSGGATETDAEAAFLAESAQVWDAQKESLSHAKPVYNKKKPVNVPNYDPPSGYVCRRCGVKGHWIQQCPENDNPDFKPVHCPKRTTGIPKSFLKVVDKSEMDEDAKGVMLNADGEYVQVMTDTKTWEKFQEKTQATKVQAANADAASKEVRERGLECPLDNRMFVQPVKTACCEKTYCNDCIESSLADNDLICPNCGEETLIEFTPDKEMEAKIRDYEAEKAKAKAELKAEKEAAAKEEMATAEAAAKAATEVENASANANVPQNETPVVPNEKEEPTSDSESKKRKS…
g617.t1	MNERPGTIPSPATPHHPRRPPAHQSVSLRHSPAAKLDRAASTLTATCHSTTLSTSPNVPASDKANPPSTVSPRLQLNSHSSGESSDAAGWFDRTNNHDHVPHDASFVDNDPPFLLHNSSSSGRTPPEAQYMTAASVPYRPGLMKLGTDASSSEDFRSVIDDLTVANKKLKRRLRKYERVYDAHLQDDKLFEVKFHRLPDHKKKELEETLRKFAAGLDDASDMPEISYAHAPALNKEATGSSISRLAESGYVSMSASGQNSSTPSNNPSNQNTDNRKMTKSAYNRQQQSIQSYLHDIPRGLLSHGNAPLSDKAKKKMIVRRLEQIFAGKRSAPGSHPQPMQQEEVAQSAATADRREREAIGQGFRPEGLRTALIMPEQGDMKEGQSTPILHIPAQQRVNE…
g618.t1	MSATRLPSTLLGTLRASASRTSGPILRQRCTYHSYDYAQPPLFAPAESKILSSAYAHVPHHGFTIDALKLGARDAGYLDASTNLFPRGVFDLINYHLVTQRLALRDSVQFAKEKDGRKLGVGSKVRALTLARLRANEPVLHRWQEALAIMAQPTYVPPSLYELAALADEIWFLAGDGSVDMSWYTKRATLSAIYSATEVFMTQDTSKGFAETEQFLDGRLRDLQTVGGLVGKLGCYPDAAACSRLGLSDHTTQSRTTRRLCTPHHHHHRHTAPCIDVAIDIDIDITIDITIDITIDITIDITIDITIDITIDITIDITIDITIDTAITPPPPPPSHHTSTEQSHTVVSRAAHMDVARTLPS
g619.t1	MVRPKKAEVSDYERKRQENIAKTQALLHNLEMEAAQAGLGPTSKAATSAKPKTKKASAARKVKVEDVGPRRTSSRLKGIEADSEKAKRKAEEEFVAIKEADRAKRQRVSGAFNFGDITVVGKTWDQSGSFLRIVGPANPYERTFDFDDANETTDKDVKELRERMSGLQLWEDFEPNEIKITPERIYAMGLHPTEEKPLVFAGDKLGNLGICDASQKAAEVKVEDDEDADTEGPTITTLKPHTRTIHTFQFSPHDSNALYSASYDSSVRKLDLAKGVAVEVYGPQDPNEDQPLSGLEISKDDANMLYFSTLDGRFGMYDMRTEVMDAQIFQLSDKKIGGFSLHPQQPHLVATASLDRTLKLWDLRKITGKGDERGPALVGEHENHLSVSHAAWNSAGQVA…
g620.t1	MKYAFAFAFAGLVAGALAGECYAPAPPAYSATASAPTPPAYSAPPAPSATPAPGPGYFAVISSRSASPVHLLSLTARGGKFYLGAGPPSSYCPENIGSGCPPGNDTIFAGGDGTLSLGVVVPGGQQVYVAKDGALSYTVPHSAYIPEGSVIDQFSKTAPGSNNLGTLNFETGFVACPVGGTGSGYQVYGQVDGFEASSECLGFSALTSASEQPGAWQY
g621.t1	MPAIRFVASKQVKCRLATGTIQLLCHVKPGASANREGITAVTDEIIDVCVAAQAREGEANTAVRTVMAKTLKVPKSDVEIAKGTKSREKTVAIQVGPNVTPTEEIERIRALLSSSVAQ
g622.t1	MSAAPTIQPKFLPSRQDVGVVAVGFSGGQPKAGVDAAPMALIEAGLIKELEEDLDLKVTFDGQVHNYAELLPAEDPDYRGMKRPKFVSAVTKEVSEQVYNYAKTGKLVLTLGGDHSIAMGTVSGTARAMRERLGREIAVIWVDAHADINTPETSDSGNIHGMPVAFLTGLATETREDVFGWLKAHHMLSTKKLVYIGLRDIDRGEKKILREHGIKAFSMHDVDRHGIGKVMDMALAWIGSDTPIHLSFDIDALDPMWAPSTGTAVRGGLTLREGDFIAECVAETGSLIALDLVEVNPSLDEVGANDTIRAGNSIVRCALGDTLL
g623.t1	MRQLPSSIRQLIVRHAGCTTFPVVTTRQLSHAAPRPQLGALANAHLSRQQRSITIQQLDTGRDNRERVVILGSGWAGFTVARQLDNKKYQTVVVSPRSYFAFTPLLASTAVGTLEFRTALEPVRSRRTKVEFVQGWGDDVDFKNKTLTVEQAVDDPTQGLALTQDRHAGETQEQRALEKKSDVEKGRTFDLTYDKLIVTVGCYSQTFGTPGVKEHAFFLKDVGDARKIRNRLLACFEAAALPTTPDEMKKQLLNFAVVGGGPTGIEFSAELHDLINEDLAKIYPELIKYHKITVYDVAAKVLPMFDEKLAGYAMDKFKREGIDIKTKHHVEELSLGSPFERNNLSSEKDHRMFTLKIKEEGEIGVGMCVWSTGLMQNPFVHHALSNVRAVPDNLRLVES…
g624.t1	MPHHKNLAIHPASFRSSHLSIPPSPFSPRSPLTPVPRPKKHGHATGINTTAISTQPPAPNSPLQWVWTCHACTRAYPLGATRRCLDDGHHFCAGTTTAKSWRKDGSRKQVRRRRACSSEFDYLGWKDWGRWRRSQPARRSVGRPIQPLILDTGDEKEKNCWRNCDFPSQCRWGKQAGIHTPTPTRVEFPASAPSSETWACSAPMTDMPTLADCFAAEDNASNAEHRTGTGTDADADADAGALGRLLRISFKQRKRSGLTPSSPVCISTADEAVDIEMCAIDTTAPIPEPHGSCIDPSLLVLPDPAYTSTSTSTSTYTSTSTSTYTYTSTPTPTYTYTYTYTCTPSPTNTSLAPSTRSTAPPSPSPTAAKPSTTIQRSRARFSSGRTASPRQTVFPPVAD…
g625.t1	MRSTTLSALAGFAALAPFTAAQSTSSKRGLCHVPSQKYPGDDSIWISGGSDLTWYYNYQAEPSDAYKNKNIQFVPMLWGAKDSDTGTPFYDSVKSQIDGGANISYVLGFNEPDGTHTTGGSALPVDLAAARWIAEIEPLKKLGIKLGAPAVTGGASGWAWLQNWFTACNGSCTPDFIPVHWYGNFDGMASHIGNVMATYPNMTVWVTEYALPNQDLKTTQDFYNTSKNSMDSWGNITHYSYFGAFRSDVSNVGPNAAMLDQKGKLTDIGSWYMGGVATNNIPKGAGGRIQTIGLPVASVLALFWACML
g626.t1	MKFHGSYSSMLAPFLLLASAPLGVLAGDVLKTNGYSSCLTGNSDIKVNKLDIEFDRSTKKVKFDVSGTNAKEQKVMATLQVNAYGRSVYSKTFNPCDTDTKVDQLCPVPAGTFGATGEQSIPESYISQIPTIAFNIPDIDSQAKLELKSIDSNEELACITSQVSNGKSLSTTGVQYVAAGIAGAALAVGGLSALASAGQAGVAHSSPTFGDVVFWFQGMAMNGMMSADIPGVYRSWSKNFAFSTGLIYWEGMQSSIDGFREKTGGNLTTDSVKFLSNATLVHVDQNMTVSKRSFDGISDVLLWARDDLSTNINGTEEATGDSKVVHAVKGIQGYVEEYKIPNGNTFMTVLLWFAIVVAAITVGILLLKVILETWALFGTFPKRLTSFRKRYWWILAKTI…
g627.t1	MAKLSLLLAVSQFSLVYSLPANDINRQPEIPDERAITISTNLDATTSYSTAIESLQTATLTTRPSLTGSILTALPTGGGITKDPANLPGITATFEPLCPEETPLVPGPTSPAGLPSADIFVPLATGVPAPSIPFRNDHVVQKQNIVDGNVPIQTNKFYANFFLGSQQSPVWTHPYSLSWAKGRGGSYGMAISHTERSQFAFGPDTNNPQYFISPIGIQQMALSAAELQAGTAMTIENLKAFSVYANFAPSAGSRVVMSVPVVQGMGFITSVYDNCQPMISSGVFFRSLKYAGQVNSVTFKYNTQLEDGSQWLIYVTPLAADGVPPLTLVGGGSIRGPDSFTGLIQVTKNPSGQDGERTFDGSAGSYAINATISGAVNGPSGSYTLSWTKGGVLSQPLVM…
g628.t1	MSGHATATLCWRAASLRAIACSTARQLPPRPIPVSSHIRFDSVMSGTQHPHEPPPSYEAATGPSSSSEPTPGLSRVSTDGPGARTERNGIPMERRRSMEDELRELPPGWVRTFDPESHHQFFVDTTADPPRSIWTHPYDDEQFLSTLSPEERKKHSRMKRTVTLQDLAAEDSDDDDAHAPRAARGKSAEPELKGFHKFSRKLKDKVTGSTHTEREQQRVRRAEQERQAYQAHLRARQALIRAMETGEPQFLCKDHQGKDVYVTPPNGYAPRGAYGYNPYGNPYARGAYANPNVRYMRPAQPYGRPYGYGYGGGAGLPIAAGFLGGALLGGALF
g629.t1	MPTRLSNTRKHRGHVSAGHGRVGKHRKHPGGRGMAGGQHHHRTNIDKYHPGYFGKVGMRYFHKQQNHFWKPVINLDKLWSLVPAEKREEYLAKKSDKAPVLDLLSFGYSKVLGKGRLPEVPIIVRARYFSAEAEKKIKEAGGVVQLVA
g630.t1	MLANNTRNAFAAVSKRLYICQSCLRRSKQLLLAARHLPTRPPARSLQTASQSPAQDDTPFRKALKDAAKQQKKASKGGKKPQKATDPRLDKWELTVGIEIHAELNTARKLFSSAATSISESPNTHASLFDTAFPGSQPRFQTETLLPALRAALAFDCTIQRKSSFDRKHYFYQDQPNGYQITQYYEPFATDGHITLHAHDFPAGSAPQDCPIKIGIKQVQMEQDTAKTVQQPPSTHLLDFNRVSHPLIEIITLPHIHDPLVAAACVRKIQTILKTVDACTAGMEMGGLRADINVSIRERGQPSSEGGLSYSGVTGLGQRTEIKNLASVKAVEDAIIAERDRQIELLENGGAVEGETRGWTVGSKTTKRLRGKEGEIDYRYMPDPDISPVFIAQDLVDHL…
g631.t1	MTASNTAPADRRERQRNARAIRRGLAEITPGNSSLQTQSLLFSKLPAEIRFLIFQFLLSQAHDHNRPISIHSISPLYRPGHAYRTKIDTAILLTCRIVYYEAHAIPIRSATHHFRHLGSTSWLYEGDVWLHHMTKQRGADVYHLHDNLVALNPRNFTKFFLPHLSWKRVTWTICAYLWPPILAGYREIDRLAETLACVGLPVSCQEVNLELEIRKDVPEFRESLQQQANLCQKIGFVTGESTQGQVHTAQPAGLRRSDGSILPFDATNSKQYTWVGSGQARWGTSALIMEKETVKYRTIRLCWRARVPRREYMSYDYMNCLDLNNCEEVEGIKQGGLDDTSLRSPATHH
g632.t1	MQDVVQKHHPEVNNGSLPAELNKANASATQSKMVEHLIEFVKDLRPPKAVEGRSDTKGKSKAASAALLSLGDVRRSRDRTTLISVYLPVSCIDSQIAHFYCVEDGSLACSEVAEVNCSYLTNSTGSISWVLVEREASLLNDINPELGFTRSLFLSPHPRQGNPIYSQGSLLTALDDMGPDRDLVFTTLPVGSVEVIKKEDQQPVPTIEPPRTTGGSQPTASGSQPHASSQLPQFHASSQPPQPTGGSQPHASSPPPLPKRQPTGSSQPLQPTGGSQPPASGSQTFCTRSRMSSSSLPKLRASSWSRPSMMFLPKRAPRAALLTCEPDAGEAGGIVASANPGDWHPTMEGRTYFPVRGAKREEQKAVVEELWEVMGGRRFVYADTKAPKDGGISAAATD
g633.t1	MSYSWIGPPAEFNGTNEITGGDSLTENLNQWYDAGDQAYILVASAMVMVMIPGLAFLYSGLARRKSALSLIWACMFSASVITFQWYFWGYSLAFGPSTNGFIGNLDKFGLKGVLGAPSPGSPLIPELLYSFYQMQFCAVTAAIVVGCVAERGRLIPMMIFIWLWATIVYCPVAYWAWNSNGWFFKWGGLDYAGGGPVEIVSGCSALAYSMILGRRQEKMMLNFRPHNVSLITLGTVFLWFGWLGFNGGSAFGANLRAVMACWNSNLTAMFAAMTWVILDWRLARKWSMVGWCSGVISGLVAATPASGYLTPWGSVILGITTGIVANFATKIKFWIRIDDSLDVFAEHGVAGMWGLFLNGILGADYIIGLDGVNNGLTAGAITGSPEAIYKQIAYIAACT…
g634.t1	MVLSFILIQNRQGKTRLAKWYAPYSDEEKVKLKGEVHRLIAPRDQKHQSNFVEFRNMSKIVYRRYAGLFFCACVDTNDNELAYLEAIHFFVEVLDAFFGNVCELDLVFNFYKVYAILDEVFLAGEIEETNKQVVLTRLAHLDKLEHEIEPPPRPSSATDHQLAADPVDAQPSEAGPAPTRPRHQHPRGAIMSDFSTRPAQAQGPPNPNAPPRTDDPTRWRPPVAASPAGYSQGGSPYTHGGSPYPQGGSPYPHGGSPYTQGGAPQHGSPAQQQQQQQQEGYFPPQASPPSHHGDPNVNQLAAQMGGVGLGLGGDAPPDHRRKKKDRHAYHNLEGPGGSAPAFHGLPQPATPSQYSPQVGGPQWQEPQITPAMSQFPAATPLFTPGAVASPMQHAARAHT…
g635.t1	MVYTGKPSRGCGMCKSRRIKCDEKRPTCGNCRKSGRDCPGYPDEFDLVFRDENKAMARKARKTSGPTPTRCTPDGLSAQASPNQPTFFTFEVSNASTSQEESTTAQATPDSEQQLILIPQYPEALSSQGLFDNWLWNLDRIPQSIAMAPDYEAVTFFFKNFITLPQQAESTRGYLEFLVPLYNQALPSSVLHLATSAVAMAACGQYPGREALVGEAVKTYGKAIRKLNTDLKDPAMSRSNETVLAILMFSLYETIMSTDDTITAWGNHVDGAVALTKLRGTDQFNDPMSHAMFRAVRTMMITSCVQRSKPIDTFPGQKGWVGESDIAEENAANRLTLICIDLPNLRARANKLTSTMYDPAEESEARQIIDFAQLVDGNLEEWYRTLPPEWKHRIIGIES…
g636.t1	MTLFDDHLLSPVGIMYSLGILFASVILYAISTIVYNLLFHPLRHIPGPWLAGSTPIPYGLQMRSGKIVTWIQQLHAQYGDVVRVTPTEVSFISGETAWPEIYGFRTGEYKDTGAYLKDNAWFPKPINGVWSIINSNEADHARLRRNLSHAFSDKALRSQESLITSYVDLLIHKLSEHAENCAPVDIMRWYNYTTFDIIADLSFGEPLYCLRDSEYHMWVNMVFSSLKGIPTIAIRNKYLVFRWLDKLRGLFTDTQVAVRARKQFFDMASARVSTRLEKETSRPDFFTFILQNQSHANRALSRGEMDTNAVVFLVAGSETTATTLSGTTYLLLKNRTAYNRLTTELRTAFPTASSITLDAVNTLPYLLAVLQEGLRYYPPVPTGFPRTVPGAGQVISGHF…
g637.t1	MGAFNLVPLAVLFLVVGGVGWVGYQIYLYSNELAERGVRKMEKKNVVFTKDGARVGVKEVSAEQYADKTQKAFVKTWNAAQDSPQTGNSVRTRRA
g638.t1	MDRLERLLSRPTAKPYKSRDIEASEEVYLNDDGLLEFGPDDIENPKNWSTARRWYITVVSVVLVVNATFASSSPSGTLDGISKDLHVSTEAAGLVITLFLLGYCAGPLIFAPLSEFFGRRWIFYITFTLYLAFNFLCAFTPNFGGLLVGRFLTGTFASAPLSNAPGVLADIWGPLERGNAMAAFSMMTFIGPSLGPVISGFLELKEDWRWCFYVLLWLGGVTELLMFTIPETLPTIVLRNKAKRIRALKIPGHEDVKAPVEVTDRTLASMFRVSLTRPWRILIDPISFAVAIYLAVVYALLYMLFTIYPIIFQQKRGWNSGVGELPLIGTAIGAVIGGGIIFANTARDKKKLESGHKSVPEDRLPVAMLGGVMFPVTMFWFAWSGEYNSVHWIVPVLAG…
g639.t1	MEQNGAQSKRKQPPTPSNERPMKQIKAETDVHSRNGVATSPTPEMDVDDAHSDVSLEPIPIVPVAGAVHDTAEWQKTIEGVVKSVVSIHFCQTCSFDTDPAIASEATGFVVDAERGYIMTNRHVVGAGPFIGYCIFDNHEECDVYPVYRDPVHDFGILRFDPSKIKYMPLTALQLHPDLAKVGVEIRVVGNDAGEKLSILSGVISRLDRNAPEYGEGYSDFNTNYIQAAAAASGGSSGSPVVNRDGFAVALQAGGRSDGAATDYFLPLDRPLRALELVRQGKVVSRGTIQTQWILKPFDECRRLGLSADVEEAVRTRFPKETGMLVAEVVLPQGPASSKIEEGDLLTHVNGELLTQFVRLDAILDDNVGQTISMTIQRAGENMSVELDVGDLHAITPDR…
g640.t1	MSDTEPKTPDKGAATGAAWTDTEREMDQQAPVPGGRNVNACRKIIKKLKEKLKDDIDNIKAGLPVAASAAEGDAATTTPIKATPRKRKTNGGAGGEESLKKATPRKKMKSEAIVRDEEDIKT
g641.t1	MGYDCSIIENISDLSILKDHKPAADDSILNATDGSRSYYLQGNSSMVIVQNQTDPLRTLWATNAYAVLETAQQMWPSRDIFDRFQGSSPNALFTETASCYFNKNESPTGDYPGINQQRIFETLLWQKVLNTSYGDGAPPQYNFSIDHNITELYGAYDDLDLEYNIPANFTDTCPHQPMTATGVQCKSSSSVGTADIEGVHSTYSNFARTDTPINTQRYRRADRFGAKTLTSMNPGRSTDDEWFSNFFTSTAAPPLFYAPYSDDPDSVDEGVGYMLKDGYPQASQLRQSMLRAHAAYAVQLMYNGRQGFTARDDNHVILLNPNITCFNAGTVIKQGIIPAGVLVALFFL
g642.t1	MSISDNSTVAVPHEGEGAYDPLNESDYYSQPRDTVLDKSPYAECEIVLLDAGTSATRFLVHSSMIRKSAPLFALASKGQPVTLSKLDESAAHTLVNYLYTGNFQTLLSHEFSDDDAAYEGFKLPTCVYCAAVRYQLPGLAELSRQKITYAGQRLPIFDILKIARDHAFPLLPEADRWYSEYLENTVHDAMSQDPEPFRRPDFITKVEGNSRLLQIVWKTVMSNCAAVIAQVSGELQLENGAETPMADSPFVESEVATQQSFHQLPSPTESVLDSPLPESAQILLKEPEHLDIVLSASESVRNSTVASSSEADDSNAQIDTASNDNFDLPAIEPTIDHHENMDTVKAKREGVKKYGHVRADSVLGEEAVLDKDSDDAKRGGPVEAIPAAGNGNHDTPKKE…
g643.t1	MSDNIHGVIAGLQTSFPIAMLMAGLLAVSFFSVIELTVWTLSTFQRWKGLYFWSLIVATWGIAFNSLGYTLKFFQVTTANLFSVTLIIIGWICMVTGQSVVLYSRLHLVLHNHKKLRCVLIVIISNFFACHVPVTALVYGVNSSNPSPFLRPYDIYERVQLTIFACQEALISGLYIYYARGFLHTARHSRYQPRNTLMFQLIYLNLILMALDVALLGLQYTGFYEIQTSLKPAIYSLKLKLEFKVLNNLLRSTEDQSQNLEAYTGSNSIPP
g644.t1	MNHSSKTPEEVAHPKALNATTDVNMTEAPVTWKAYLLCAFASFGGIFFGYDSGYINGVLNSPLFIEEVEGPICPQGLATPNGACAISSSNTSLIVSILSAGTFFGALAAGDIADIYGRKWTIVAGCIIYIIGVVLQMAASGRDLLVAGRAIAGIGVGFESAIVILYMSEICPKKVRGALVSGYQFCITIGLLLAACVNYAVKGRGDTGEYRIPIGIQFAWGIILATGVACLPDSPRYFIKRGHTEKAKVALMRVRGVHPTDPASEHLRAMVDFELAEIIANEEYEREQTPAGGWLAGWTNCFKGSLFQSNSNLRKTILGTSLQMMQQWTGVNFIFYYSTPFLQSTGAISNTFLISLIFTLVNVCSTPLSFYGMEKFGRRTLLLYGALGMLICQFLVAII…
g645.t1	MLSLRLLLITSLVWATAALKVSKDARCGRKFDATCQGSIYGGCCSNYGYCGSTKSYCAVENCQPGFGSCNGKQAGTTMNTIVSASCPAAKPTTVTITSTTAKGTITKSLTVTVSGATSTCPAAGKTTITVPTTVTQSAVASTSTTTTTTTVAGADATTTLTLPAVTSTETLPAVTSTQTLPAATSTETLPAVTSTLTLPAVTSTETLPAVTQTMTITSSLTLPASTVTSTSVRVLTVTLIVG
g646.t1	MLIRLLKIPRSLVLLLAILAFFTWQLSQGSSHEPTDASPRAPGKANKKTARIALMTFVTEQRSYLHLSLKNKDHYARRHGYDFVVDYEAHNDRTVMFWKFDMAEKLIKSGKYDWLWWIDFDTLITNTATKVTDIIEDELRNATNPDDIDFLLTHDCNGLNAGSFLVRGHERSLKFMHKSVAVYDEAKRKDVSMSEQDAVVKLLNEDKKSANRARVIPQWKLNAFPSEIACFDEEQKVWEHGMFVLHFAGAWAHVKGEDPTGYLMNKYEGDIMWGDWKEFY
g647.t1	MQICVPCNRSFGSETALKQHQQDSPVHAEACDCKPCNRSFGSGSALEQHQRNSPAHAETFDCKPCDRSFRSTSALEQHQRDAPVHQNAGIPAAVPLPAAPTSPPLLYNNAHSPRHAPSAQTSAHAPGQRSKYKASRTSYTFSELHELIAHAVVPDLPAPHFHPPSARFKNERATNVMGNFLCTYRKCPKQSWGSKIVAIVIRGYANNGYSAEVFGQRCKSCDRLGALTLDVQSYVERVAFRLKTWAGVRMEEPPFEKMKGPPHESAFCEGCARGGKGILCRLPMFIHVDRDHTEGLCDTEPMGVLADCIDLSDSPKLCQAPDQEADRATAPDANNMTFTHFSELTTMPGGRRYICKTKQFLSRLVLGSFGTD
g648.t1	MAEYFKNPPPGLDLTESRTATGNIVGIVLFISAFVFVSLRLFTRLRLKREPLGLDDYLMFVGLALNGANLAFVVAGGRYGLGKHIWSLQPFHMRKISIITFIYVFIYTWSVCIIKFSILALYRRIFGLSWLGYCCFGLTLLYLIVNHVVLPLYTRPLSYYWEQWYGAQGVLLVNEAKFYLGMGIVNLFGDICMLAVPISSVLKLQMERTQKVAICCMFLLGSFVCFASLYRIITILRLVSSRDISWAKSDVFLWSSVEPSIGIISGCLPVLRPLMTYILESWFRFVPEVRTNSSKKSKSSRNFTLNPLETISKKRTRKIKKHDLESTNMTNFTQIDEELEVDAHGAVTYVGKEDKKIKVSVRKGRDETGTWRPDDDEMCLTKTTAHRSLSGAGMEDRSK…
g649.t1	MAPPKETKFKVAAAHAAPVFMDKAATIKKTIKLIEQAASDNVKLLVFPETFIPGYPYWTEAYPPMDQVGAIAKYTEESVVVEPNGEDVSAIQDACRHHSIAINLGISERMANTHTLFNSQVIIDSDGTILGVHRKLQPTFVERMVWAQGNGSTLRTWPLSLGYNLGGLACWEHTMNGARQALIMQNQHIHAGAWPALSTLRDFAGVANTQIEALMKMHALTAQVFVITASDYVNQQALDWMEKNLGKQDHIKAGGGWSSILHPFCMFIAGPHSGAEEKLVTGEINFADLGPVKVWVDAAGHYQRPEILQFGYDSRAHWLDEKVDRFKPRGELKPKEEADEQS
g650.t1	MTSTEDTPASHKFQPDTTAMEAFAPPSASPSHYSPEAIGFLFGAGALVLILIILWVYIAAEGGPSETLRSFRGRREAKRKALDIEMAERTADIDRVLAQGEVDKELEEEQKIARQEALNLLNGLMANNNLVGSTLPARPKAVDFREEQGEEKRLMRLQKSWNPVI
g651.t1	MPSSSSPSVAARSSTGHTMLFRLGSLRIELNPWNPLYAVAPFITILVSIPLAIFAVVTTSIALSLLAFRGFVVYTQLGTAILSAWMSPAPPKPVALQHQPASPKRTSPPRNRNGRSGSNASGASSRNDATTASRLGPKSESSTALFGGSELTRDYEGVGGWRDTGNEDEEALWIGINSRLQLPAATPDRRHQRRHTGGQSPNQRWSRSPEAFRMSPVQSRARTPNRFMGNAGPDNEDYFPIQPTNKARLISTVSDPSKRHNRRLSGSASSVSSLASGIMAAVREVGE
g652.t1	MVSQQLEQAYEKYRYEALFGVWLVVTGATFMRIKRQPYSTRLKVEQYESIFKGTSLGAIVLGVVMSPKRGMKRVP
g653.t1	MAPHCLSQYSSPELCTNYHTGLSTRGKTWRFDSSPRMVSNDLALSIAVPVAVGVVLIVAILLVPKGFFSYVASKIYTASCNSNTSNSTRRWFGRHAQNETSSMNEKSQPTFVEQHLGMLRAWQKPTKYARHLQPVQPTKPGDSHQPFRLTGMSFRYWQEFQRNASVRCNPMHEFKVTGEGVKSPAYWTQVGKEIEARKSWWEIIKA
g654.t1	MLATGKPVWYLPFTILAIIFFVVSIARLGYDRYVFANSRDPGSLTAFLSADTITALKDDARLHHALLGLTESIAQTSSDIGHKYGFEGVKDFGNTLTEGVAEIRKRQEVTGQKRALVDDTTQAIDSLLSGLNVNASGGVSGIIDSLSNSLFSGLATPALFLGVGFGIGASTGLNITDMATAKAQASKVAITFNATATGVNLAFQNIGSGLAGQIAPSLGQFGMTSVLFGPAAYALASGIGNATSRALKLTNQEFRPSDNSGIEAVAGNLGLGITTPIVSNIDFQAVMKSVGGSGLGASLMQQLPQIAAAAGNGLGEGARNGLGFKQAGQTKNQIAKRQTPTDTLKGIDVPGAVNQFTKGLSQSFLTGVDVGNLASSLNITGNLGGMIDPSMFPALAAGA…
g655.t1	MATSASFDVIGTCFEFEVPITAIHDRLGDKLSTARCDPKTLFFAWFYAAQRDFTYVSLAGAYKPIAEILKLTFKRACLIVDLPASAVSDDDVAAIMTAFKSMGPREGLKECFDGLREAGWDVYGVTNGGVETSLAYYHNANIELDEQHLLSCDDLQIAKPDVKVYERAQDHLTKQGLGHKGDGKRWFVAAHAWDLIAARAAGFKTAFLDFEEHDPVTEVFGDFDLYAGSMRELLQKLTEAK
g656.t1	MLTDNIDSLSSVRLVGVSSSLHDLIKSLLFPLPHTRSSAEMPSVGNLLYYSAVVAWSAAVYQFLIKDILTVGLGLGRVIQSIDEFPYSCQRIEHPQLEACEDLWLDGSDRTLYAACAGTRSRMAWSPAISKLDASGRRPSGAEIVALEIDSIAPNGFFSLRSIKPTGSFGAQGNAILDTVGFTGEFIDDTTIHFYFPNVPPYHGTYFDATELGANATVEVFEFKRGNDEMKHVRTIQSTAVWSPNRPAAVGNGDFLVTNDHGAKVGWRKHLEPLIGGGTVAYCSSEGKCHSATPAPGIDIRANLKFPNGLARGEDGLIYVPSSADGTIKVFALQPNRTLTQLHTIRVGMPLDNVSPDARGDLWVPGFPDTRQTYKGVADPYQHVSPATVFRVRKVSGAG…
g657.t1	MASRRSLGGGRVLGSGRNLSSAVSPAASPAASPAPAPPHTLQAPQPQHGHVRNVSLLSPSESSVSLSSQTSVSPASIAETGEDIGSKVLLGPSEHAAARASSRLACPICNEHMVTLLQLNRHLDDNHQNLVEEEQDEVKNWFEEQMVKAKKFQPLAVLNQKLKGLDVFESNSAPTPPPASHTRTAHDTPPAPIIRRDPEEEVTRAHWQRPGYRDVCSDPLCRRPITASGVALGNSQSAVNCRQCGQLFCEDHTLYQMKLSRAAKHEPVRGIWCRVCETCYKSREGYNDHHGLERNHFDEFAKIRRKRLDREHMEVSRLEKRLTKLTQLLADPPPAEGTPTAGRWFGLSTVGISTAKNQRKALEQSIITWEEDAKVSHCPFCQQEFSTYTFRRHHCRMCG…
g658.t1	MAHEQDFPEIQGGGSLILAWQIRNKRVLVVGGGEVAAGRIVNVLNADANITVVSPREGLNPEVAYRIEQKQVDYVDRKFEPSDLEGVDMVMTAVDDPEASSQIWKLCKEKRIAANIADVPPECDFYFGSVHRDGPLQIMVSTNGKGPKLANIVRRQIAANLPPNIGMAITRVGMLRKKLRQVAPDISEGPKRMQWMIKVCEAYSLDDLCSMTERDMEQLLGFYKPNAAPSLDLLRLQEPDDRHIDGLGKRALSRISTPSTHYQAFSTPVVVCIHDLTAFEPINVGWPMRRSLMIPPSLTSNPATPLHLSTALALAPLQSWTMDLAQRPPYSTIDFKTLAKADPDFKQTWQACSGKLDFQDPATLQSLSKAILHVDFDLELALPDNRLCPPIPNRWNYVS…
g659.t1	MNLCSITETIPERRGRIDTPILETLDERRRTWLYLLRNQHYEPLIFDILNDELPKYATSCAIDPAELTILTRECALILASAPRVFFAAVEGSLVGRMISDTELQAEYASIQQRAHHQPSIYAHLLADDRGNAPTPNQCLVIRDMVQDYLSGDPSEHAHTIDNVTPPLVLLEASTKGYRKYLHTPSTDRSPKRVATLQRFCSGITLRYTQTSPHLHNTPLPYPPSEVGYALQAHRRLAQHRAHRSSNHVMNLVEDICTQLFRTNALTQHFEMHQFVIYLIFRPSQAAIAEIFCSGLLQCWVEGGGFNACPAGRSVASSRRVSAGQWRVYEEAAREVSLLDARMEGMKERAEVWREALCWEDEDGDVEKKGVKG
g660.t1	MAEPTAPAPATGEEEKGPSKRALEKAAKKAAAKAKKAEHALRPKEQAKPAAKAEPVSMFAEGWLKRIYEEKPVKDVYTRFPPEPNGYLHIGHCKAIAVNFGFAKHHKGVCYLRYDDTNPEKEEEKYFTSILDIIKWLGFEPWKVTYSSDNFDKLYELAEELIRKDGAYVCHCSREEVNMQRGGPDNRGKRYACEHRTRPIDESITEFRAMRDGKYKAGEAYLRMKQSLTDPNEGNPQMWDLPAYRVVEKNHHHRTGDRWKIYPTYDFTHCICDALEGISHSLCTVEFRQSRISYDWLLEKLEMKVPKSEEKGPMQREYGRLSVNGTILSKRRILMLVEGAKVGDRTIPPSVRGWDDPRLYTMVALRRRGIPAKAMLHFVEELGVTDSFTDIEAPRFEAS…
g661.t1	MAGGEDIWRMSSKVQVQAQLEDTTRHDTHDLAVTTTTMAPLVNQPQIRQASLHNPLPLQLHLYVWPFLIVWPAFSSIYLSSARYEQYIQSQEWTFVWVASIVTLQSLVWLLTQWNINLRTLFTTTKAADIRSARLIKVQPVENAGAAEICELRRDNAGGKPNLSFLFQKRRFLYDAAAGSFAPLAYALDSEPKPQLKTLQQTQGLVSPAEMERIQQHYGDNAFDIPVPTFTELFKEHAVAPFFVFQIFCVGLWMLDDYWYYSLFTLFMLVMFESTVVWQRQRTLTEFRGMSIKPYELLAYRQKKWQDVMSDKLLPGDVVSVGRTKEDSGVACDMVLLEGAAIVNEAMLSGESTPVLKESVQLRPGDARIEPEGLDKNAFLWGGTKVLQVSHGNTADDDA…
g662.t1	MNPSQNFSLATELPRRCQLPEHLYIVVDDVAFPTIGHEDGSVVTPRLGDFHAKLDFACEDVSQDHLRSYLKQKNSLSTQSCFISTFEDEEIALRAPPFCASEMIRSGIYIPHATKLIIDTTRLHAGWIDTSSARVPVWLEHGELPKVPKGVLYMTSEGVEAFDASIWICVAEVRNVLGLKPHHGERGEWLACGHITRSMVEAQVVLHAYQREQIITSQLVPRRSVSIRSISSEEQEKHLNQQIARNKASREDLRLRAVAKNQECEKAASLLRQATENRQAQKQTGRRYATESPCKFPREEKLEQRVFVQSPSEVAGTYSVGHIATRYASVRSPRLREALERNQASKSNENLNSSSCSRLPAPQNFKKELPGHFSFHEARYVTLSDDFYSMSAGESPPSL…
g663.t1	MDAWNDPSDLPASVEPNINDVHANLSPSNSDPFKFSHGLTGVDQPANYLFVNILTATILAPVIATILLRTFVYLRNDRRRVSVITSCRSQNFWRRDRYSCWGPLKRLFLYAPLVGDRHSREIRLTSTVHAGGLPTRPQFLVIVIYVASNIAYCLAVPEQLPDQRFAELRGRCGALAAFNLIFTVLFALRNNPFIWILGISYDTFNLFHRWTARLVILESIAHVAAFVYNTYRVTYKGQDGWANIKWVLGHSVSYQWGLTAFVTFIFLLLQSLGPIRRAFYDTFLSLHRLGVIVAITGVYLHMAKHALPQLPWAVLFIALLALELLIRFGRILYFNFSWRRRNWTRVTVEALPGEATRVTFSTPRSWNHYPGLHTYVYLPRIAPFAVHPFSVAWHTSSGY…
g664.t1	MQEPSTPSSSSETLASQPQRATPPTRHHRNQDSLIFINATIPLSPASSTSNDSSSDTLLDGLAPRKRSGFARLFCCFGREERARRRALRATQFEKVGEKCHWSEY
g665.t1	MFAARNAFAQAQRRAFSASARQSSKVTVLGAAGGIGQPLSLLLKLNPRVSKLSLYDIRLAPGVAADIGHINTKSEVTGHAATPSGLAEALKGAEIVVIPAGVPRKPGMTRDDLFNTNASIVRDLAKAAAEHAPEANILIISNPVNSTVPITAEVFKAKGVYNPKRLFGVTTLDVVRASRFISQLKNNDPASENITVVGGHSGATIVPLLSQSGYNLSGEQLDSYVKRVQFGGDEVVQAKEGAGSATLSMAMAGARFTESLLKAAQGQKNVIEPTFVDSPLYKDQGVEYFASNVELGPNGVEKIHPVGKITEYEQKLLDACLADLKGNITKGVKFAKENP
g666.t1	MARPRKDVKFAHRNASNGRARRASMSMSDISETGSQPGSPSRNGAAHPPPSQPEQSEYEKKKANFIVRTTWTLLMIGGFFFALGAGHLYIIVIITAVQVICFKEVIAIANVPSKARSLRFTKSLNWYFLGTAMYFLYGESVIYYFKHVLLVDRILLPLATHHRFISFMLYIIGFVFFVFSLQKGHYKFQFTQFAWTHMALFLIVGQAHFVINNIFEGFIWFILPISMVITNDIFAYLCGITFGRHQLIQISPKKTWEGFLGAWFFTIIWGVLATHFLAQYKFFICPVNDLGANVLTGLECKPNPVFLSRNYTLPFIPEVIPAYLPIPRTFDIMPVQFHMVILATFASLIAPFGGFFASGLKRTFKIKDFGDSIPGHGGMTDRFDCQFIMGSIAFFYYSS…
g667.t1	MAMSAAAAAAADDDLDFDFSDHDLDDLPANAIQQFEADAIRATQQQTQTRRAAPESDYGLDDGDAVVNLDDADSFAQAQHADAHDAYDTYDAYDTTIDESRHFDHAHDHAHDHAHDHAHAHDHAHDHDHAHPHVQALQQPRPSQADPGQLLSRIKQLEQDKAREKRHADDLKAKLQTKAGEADTLRRRHDADLRRHERQLADQHLFHGGELAKLRAEMETLRREKEQASTNNMFHQHDVRDAAMAPRTRKPMAARPKPSAAVSPAATPRKKARGPLADGFEDDDLLVASPSRARESSKTATPSLASKRKRNVVDASPIPLQLSEPRSAKEPEPVQREAQIDAALLDYFRKDDQRFDLLHRLLAHRSSNGTDRVLEVLAQHAFPSDPSKRLSSIFYDALA…
g668.t1	MDRYFIAKIPAMAPSVLTLGLLALILSYGPHTAAATGINPLVSRQSNGTALNPHFTAISDYIDSITDDLSSINTEIHSNPELGYEEVKAHELLTSFMEEQEGWNVTRSVGNISTAFMAVFEGSSEGPTVGFNAEYDALPELGHACGHNLIATVSLGAALAAADVMRKESLAGRIILFGTPAEESLGGKVKMLEAGIFDDAKMDISLISHPTSNADSPYMLTTSTDRVDVEYYGREAHAAAGPWEGINAQDGLLVANSALSYMRQQMRPSDRVHGFISSAGSRINVISSKASGSYQIRANDETQLANLTARVENCFQAGALATGAQLNFTVRPYGYANHVSNDLLAASYATHFTSLGGALQPAEIDKLKDPSGSTDQGNLSHEWPSLSPFFQITNQDGSV…
g669.t1	MFSRVARARAPASILRRPVTQTPTPTPRRFAMAPARKQSSLPEGYKEDHSKGAMLRFEDSLPRLPVPTLAETARRYLKSVHPLLSAAEFEQTTRAVNDFVAPGGPGETLQQRLEERRARPEIKNWLAEWWNEAAYMGYRDPVVPYVSYFYSHRDDKKRRDPAKRAAALSTAVLEFKRLVDGGQLEPEYMKKLPMAMSSYEWMFNCSRVPKKPADTSVKFPFAQNQHIVAVRKNQFWKIPHEIGGKQLNTSELELQFRRVYDSAVKTDAVGILTSQNRDVWADVYPKLKAASPVNAAAIEAIEAASFVVCLDDASPVTLEERAHQYWHGDGANRWFDKPLQFIVNDNGTSGFMGEHSIMDGTPTHRLNDHANKLIFTNALPFDDPSIRSDLPNPKPLRFE…
g670.t1	MPPRAFVNDALWRCLCPGFPPKALAPKAARIGGSTIVSPRPQRSTRAPQCQKRPYSAAASAPSASPFFTQPHAPPPTSRDQYAPRVPRSAREKTPLVQLPTHVLYESLRHEGFKGHFDEVMRICNVLVKDRGQRPDKDMYAAILHSFTSSVDGTAGKVRKVLEDMGFWADSTSEGGVAEKVELDARGCENVLEALAVHPDYLLRAEVLEYMKERWFTLSDRGHNFVVAGLLRDRLFEQALEMLEDMCAKQVRVEEWVFSEAMWLLLEFGEIEEAFYVLGLKESATSTNTAGAAAGVKLSNALWGAMLDAAAKHHLHDAARLVWTAQVQPGFLKPPTGTCLSVLSLASRHGDVQLATDVFRLLTERETVFTTHHYELLIAAYLKANALSDALSVILIMTD…
g671.t1	MLTGKSLQMTQLLLVVLPSFVLFGYNQSGVGGLLSLSDWNKHFPSIDTVHVSGALKSERSTKQGAVVATFTLGALFGALTCSWIGDVLGRRKVIFVGAICTLIGEILQCTSFGIAQFVVGRFILGWGVGQLSATVPVWQSECSSSANRGKHVVLDGCFIALGYLLEAWINLGFFEQNNLPLQWRIPLAIPTVISLIPMAVVFVIPESPRWLVNKGRVEDARKSLSQFKGLDLHDPEIASEISAIELALEETKGSAVKISDIFTNGKDKLFYRFSLCIFLQFLQQMCGSNLISTYSTIIFQQGLGLSSETSRILSGGALTWKFLSCFVAFFTIDRFGRRKLFMFSGAGMASCMLALAVASSFPKTNNAAQIASALFVFLFNFFIPVGFLGANFLYCTEVA…
g672.t1	MSYPISTTAIVSDAPDGTHPRWRIVKVQLREPNEDELLVRIVASGICHTDIAISTFPEDTPGFQPYPKIMGHEGAGIVERIGSNISHVKKGDKVLLSFDYCGNEQCRACEDETPGYCNEFHVKNLSSVPGVFQVDDGKSAGGLFFGQSSFSSIALVKGASVVNVEQLVKDEEELKLFAPMGCGYQTGAASVTEVVDVGNKDAVVVLGLGGVGMSAIMAANVRGAKTIIAVERIQSRLALAKEMGATHVIDTSNFRNLTADLPIAIREIVPAGANAVFDTTGVVPLIAGAVKALHFKGQIILIGIVNGKTMDLDLGELLNRGTAIRGSVEGNAQPSKFIPQMIDWYRQGNFPIEKLVKYYPSEDFEKALTDMHLGSTIKPVLLW
g673.t1	MERAIRIPFPLPQALHPSDEAPPKSQAGVGLRRFDTSCSAKGVTLGDHDAQLGLDNSSDTMIPRPRTPMLKRVKSNWHGLPSPQTPSYTYDVSSYQSTDVLFDGHCGNKKESPRSPERRGRVRPPGTPDAVVSHFNTPFSPSTSDNAFSFESKEPSVLSQRRLRALPTLIEVDAESALEHSTQSSTRRSSRLKNKMKNQEETNSIFKPTKRVTQAPPISPQEPSQQIFTSAEPATSSFEMAIAHGDELPTLHSTDWQLMYPPGGSSHPSYPWPAADPRLVFEPHYVPLRNGLPDVSYVPGLILPMGWRQVCWSGLHPVVFDPFRQAFKLTPVGPLPLTCEEVHQGGLQNYIPGGKSHPEFGLLPQMSTFSDGSDHEVFNFEGIDWVLPWSHMKGISEID…
g674.t1	MRFVLHLALASLAAGVSIRSPSVSLYEGTKVYHVKTGRHVADVQERLAKLSHNVWESASDHIDVAIPRHEVARFEALGLNSRVLHADLGASIASEAEVRSYWKRQDYNTSGDWFDSYHPYEDHIEYFKQLQESFPENSNWTSSGTSYEGRDIYGIHMWGADGPGKPAVLWHGTVHAREWIVAPTLEYITKQLVDGYKSGDNLTQTFLNSYDFYIFPIVNPDGFVHTQTTDRLWRKNRQPPPATAANQTCYGRDINRNWEHNWDANTRGASDNECSQTYRGVRPRDAPENAAMDDFLRNIRDEQGIKLYIDWHSYSQLILCPFGHNEYLYAPELGRWTRAASLMSQEIAANSTNQTTYTFGPSGAVLYPTTGVGVDHVYAVGRAEWSYTIELPDTGDFGF…
g675.t1	MSQEPNTNALTFGNIEDILELAQKQLHGRFSDPEYSYVHNALDHLFYLGILECRAHRGNPAQILKECLQDERIVLDRHNRLQGKILLQQEMIYDVSESPENFPLRHLILEKGISLPANNFRPIYHLVDDPEKLQAAHNARRNIAGATTRSDSSSPRTMTGYAPKQHANKSGSNHDKLYDAPSPEHSFPDGNITLAEIAAFIPQSIKSWDIIDRIIWNSAKAEDIAKLFNKHRAMPAGAIVNNTVYMMMRGQMYKRSKEDVAYKGWTVGTHQHITKPDEFDPHSISVTGFRRPRIFANRSDNPADPVPFKDLANGVAVWPEHGDALDLTRCVSWCVANPEAQYFYPVDFQKVLHECLGGPVIVKPRNEDAQILSRLRVAGGTYKPRDRVTKDLSDDDTDE…
g676.t1	MQPFRTNKVSTISGDPQSIINTNQDSSDEGHQNGNMQFNRTTYPNAGAFQHLPVRRTLSGAPAQEHPNAYTIFLRDLPAHCYILPPVPLNFTMVELIVLLPNWFKNKSVVTRFMNNNLTAAIHFMILEEHRYLQFPTGKEKEKARKTIADEYRRAMRKMIPSWTKVGHTVPFGWDPNSLAMDGFVPDDVEMPGYRRPASIPFRDLTMGVQKIPEGPHAGDLTSALQFALQRPEIYMFPEDLPVILNHIGPTKITIAHTDRAIVRHYDEIKREGDHAKKYPSRHNGLRPTAEELVARLSPHETFEREKMHTVVQALRQGGRPAATESPEVYDPPFMFQRSGFNVAGMLPRNQKSVVLAQTQPNLAHEVDELFRLPAQVETDAVAYQTVEKSPIVGVERSS…
g677.t1	MASSPQGKQRLKEDKDSIKDENEQKRFDTTSRQSTIAQFIKSGQVAFGGVDPQPLKEKDEKNGEVQTWMLDRICERLADASELNGNDILALRPLLKLEYCKSGLNDCISTGFSCLLPQLLRLMQSNLTCAVNFSNHVLDAPDNEVPREMKEELLCSVAQILGAVSIEKRDSGTIKRQLATLEDAECGSVPEPQPQAKLTATAFGIFTKRLCSLGLFKPIESMLARLRSEMSHVHIVDLHTIYVPFLQELIGLMLVYGIPLKDVTYSSFFEAVLQQYLERFVGQVANGANDVERENWNQRAFAARAMLESFDHSYFRDILGDRYDRGLLPALLRLFEIAPSTTRSQPHNLCTTTSSTQSGEFKETVKTAKDKIDPALTASNVSLHI
g678.t1	MYSFYTSLAKSLFCLVFARVYKRQVVPTRDLKGQTAIVTGANSGIGLSVAVARTSQGATKCLAFRNPDRGAAAVDHVVVKCGDKSRERVTCTILDVGDLGSVHSFCQSWVQEYTKIDMLVHNAGIAAPPAGSSIKTNEGLEIMHTTNFLGSFLMTHLLEPHLSSRARVVITSSTDSYSAIAHFAYDVARTEGITAPGLFTQLIARSKAILGLEAASSAPAYGLSKAQQVLLASLLQQRLTAPATRATGRRMLLLWALRQRQFLANMTLHGRHGQ
g679.t1	MSSHSIGIPTSFDPAFLYSEYDLVQNAPSSISHSDDLEALQACILEDRAKKNVQGVVIQHQSWNLTDIFRSEGEQSIDTPLRNRTYLPIQRTSIDERPFPSSPPTFVMPLVSSPVAYPPSSSMPQATTPKKRKRSIDVRSPLNGAPKKETARRFGGFLDDSDNEDDVAALKEHSMKRIAVTSIRELPAAPEELAHCTLPASQDEIADAEDVPVEALDEYFDLQSQTKRLPLHTAPTYARSVHGSIARNSAGKTIYIPKKAKKEAISFEELIAARSEAVEGKARTSYYGIDIHSLIDEANAEDTAKAASQAQAFQNLTHQSIEQPASKTEKSNRTLMWTEKYRARKFTDLVGDERTHRSVLRWLKGWDSIVFPGSGRTKSRTVKKEFGEEEQKHRKILLL…
g680.t1	MSQHTRTTFPLELLDTIVKMGIQNKLADGIDEVDVIIAGGGTAGCIIAGRLAESNPDLSVLVIEGGANNKDVASIQYPVFYLQNLLPTQKTALFYKGNKSKQLADREPIVPSGGTLGGGSSINFMMYTRAQRDDFESWKSEGWSADEMLHHMKKLETYHGPGEKKNHGFDGPINVSDGGFREKRVEDDFIKAAGEVGYPEIDDLQSLDNNNGVQRWLRYVSPEGKRQDTASRYIHPKLEDEAHSNLHVLVESKVVRVLFDDNKRAVGVEYTPNAEFQAVIGLTAHPVKTIKARKLVVVTCGACGTPPVLERSGVGERSILERAGVPVVEELPGVGKDYQDHHLLLYPYRTSLEPDQTIDGILSGRVDATELVKNNDKTLGWNAIDIASKLRPTEEEVAG…
g681.t1	MVQYANFLFPLYVYPINNAWEPLTSAAAQYPDVTFTAVINPSTGPAPDANGCPNKDYVEGIASLNKYPNIHTMGYVHTANKWDCGDAKKDICFCTAPAADVKANITTYASWKTKGCPGWSTVNPDIHINSIFIDEAPGKDGGSCLSYMTDLTNHAKSSLTTSTGGEVLFNAGAEIELSYFDVADVVIILEDTQDRYEQIPDIGVRNGNGKYARKSSIIIHSASNATNIIQRDTSTVLRVDKDAFHSMFYTDRSTDQYAYFPYDWAEIVKEVNVVAQANKAILGA
g682.t1	METWLTSADISKVTAIQLSTTTATVSSTATLSFTSTLPAVTLPAQSFTITSISTQTLPAQSFTVTSVSTSIQTLPAVTTTATSISVQTLPAVTQSITQTLPAVTQSFTATSISVQTLPEVTQFITQTLPVVTQSFTITSVSTSIQTLPVVPQFITTTSISTSTQTLSAITVTSVPPPGTITITSVSVSIQTPPAPPAIIEIPQAITLTETSLSTLTQVLPAITVVSTSVSVSTFILPASPCPNYCLHLNSPSRYVIGTRAVDSISPRNAQFLDETSLHQNFIISITSLITSFLTLAPVTEIITTTNISPPDFITVVSSDIQTLTATTTLSQTATLTEILQITSTSVDTQIITAVSTTTLVQTERSTELSTISTTQVITTTVVQQLTSTETLLLTQTEQI…
g683.t1	MQLVAFGPRQWKDADVQKLGGSIDFLVGLHSGHVEPQAWPLQSTRTYPSFVDRPIDQSVFYRHGAANRDSNQCLYPDGNDIGDLNINLNSTSYYYYNILGDLNFDLNSISHH
g684.t1	MTERLKSIVAQMSPSTSGLSTITTKNPDDVVITLAIRTPLTKAGKGGFKDTKLDGLLVKTLKQVVAQSKLDPAVVEDICCGNVSDAKAAYYVRAAMLAAGFPNTTAGSSLNRFCSSGLKAVQDIANQIAVGAIECGVAMGAESMTSGGDRLERPFVDEILQNPEACDCMQPMGQTSENVGNDFNISRERQDRYAAESYRRAEVAQKAGWFDDEIAPIKTTIKDPKTGEEKEITLTKDEGIRYGTTFESLQKVKPAFLPHGDKSHAGNSSQLTDGAAAVILMKRSKAEALGQPILAKYVGATVAGLPPRIMGIGPSVAIPKLLSQFKLSLDDVDLIELNEAFASMAVYCLETLKIDHNKLNVRGGAIALGHPLGCTGARQIVTGLSECRRQKKKVLLTSM…
g685.t1	MDILTMVEDQPTPKSVYNWRVYVSAMTASFASCMIGYTTSFIGTTVSLDSFKDEFGLSSMSASHSGLIQANVVSLFQAGTFFGSIFSYGTAYHFGRRITLWAFVTLFIVGVCVTFLPLEDILAPFTLGDLSQGLVKEAVL
g686.t1	MSSTNPTVRHATRKDVPTILGLIQELADYEKASSSVEATVESLTRTLSHADPSDPDNPDKFSKGYAKTLLLTDPDGTIVGMALYFYNYSTWTGVPGIYLEDLFIKDAYRNKGYGTLLLSQLAKETLKVDGKRLEWSCLDWNEPSLSFYQSEKIGAAKKDEWVGLRVEGDKLDALAGSSAS
g687.t1	MSAWPSPTASPSQAKSLRLLRALLREASYLPDAAARDYFRRYAVARFRAYQPADHATASFDVLALAKHRHRAFKRRHLAVIRARTAQQQRQAHKGLNLLRRANQGEGPCLEKVLWFTYGRLGRRKHALLHDLLKPDPAWPEAPPPLQLLYHSTAPCLQYFEAPAAHGTHGTHTIAISKQYPRLRAVLASQSHNALALGRAIKRPYFKAPIRNTWERPMPLERAVNNVRRWYAETMTRLLPALPAAEWDSIHAMSTGKQRIAFARRRTPATLVDLPRALADEDDLPKRLQRNLALDKLSKADRPAGIDRPHALTARYMQRLYAKLLTLSCKLEYDAVHKQWNAIWGEPMKSIRPVSYTAPVDHVLFADVDAKGLRPKAHQTKANTRPLVQPRTEDGDYMR…
g688.t1	MHVGGAAVVGGGCRVGDVAQLARRATRARRRTRSAPQRTAGHRLPASQQQTTTTTTATLETRSATDCDRLTATDCARLRPAATRLRFFAGGSHSASLCPPPTVAHHPPSPTTVAHHRRPPPSPTTVAHRLAHAHQLAQTAHPAHPAHPAPHRTPAMQQVARSFPDPQPVYQQSPAHAPAPSPSHSHSALMAAPGFNRSFSDASGYAQQPHAQPHAQPHAQPHAHAHAHAQAQAHAHAHTHAHAHAMDKPQIYTAVYSGVSVYEMEVNRVAVMRRRSDGWLNATQILKVAGVDKGKRTKVLEKEILTGEHEKVQGGYGKYQGTWINYRRGREFCRQYGVEDLLRPLLDYDISAEGTQGHGLDTPTKEQAMAANRKRFYTQTIDARQPSQSLGGTFFSNIS…
g689.t1	MLENPLVEPARILRHAGRVILGSNASSFTLENQGDISTRAEVVLDYQRCEGGIPVFEIACASGATSIGVNIIYSEGIEGIDHDTGDGPFFLFSNAMDTYRNTFMTVPAETNPQTTRAVYAQRSQRYQKVILTTANASITFTKIAFERIRPSAPPRSTFTCSSELLNRIWQDGVRTVDRCTVAKGETSSAWEVTDEGTRVRGQHWAPCRFGTRWADKTVRFQVQIESGGASWAVHMVANGLIFCLDVVERVLYACEGLSTEATIFPVAEKGRWALGDLDMDAWLEVETATRGSTVIISVQGRQLAFIENLDIRPILGGSPNNTGSVAFGGPCQWVSRYRKLSVHDSQGNALYENDFLRKDEQRTLVDFQVGTNALACTIDGAKRDRACFGGDLYVMGRSI…
g690.t1	MIEENLPDARQPTNIGLHTELDEMLVHSPWPKPVSHYEPYFDYATFARPWNYHLDHTADTSDWFSSQFFAALRETDLACSPLFQTWNNTGYEPTTLDIMGALDRGHDMLPPSVTVDEGAISLQTGDDLLQSSQVRPRPNERPESLPGRASRVASPPNESSHEDRLPFAWDPRSKPIARANPIVLPMNDPIFASINRAVEISQTTLSRVSAFLRPANPVNGEDIFTMPELPLVNVFISLFFGKFLPQVPVLHKPTMKIEAFPPALLSIIIVIGSCYSRLRHTRRFGIIVFDRTRQNLLALIEEDNSLMRDPLSIYAAALVCYMGLWCGNKRAFELSEALRAVVVTYIRRLPNDHNQQVQPFHEMRHTTTRGHTNSVPHLARSNPLQSQWSGWATQESHKR…
g691.t1	MKDELEKQEASSATMIENVANDSDLQFGEGLVENDRDSSLWASAMSHKLILAHSIAAFLAGGVFGYDSVINGASISMPAFLLYFGEHTATGSLFVPSIWASMWTAMSYLLQAIGGFGIGFVSDRIGRKWACVGAACISVVGVGVQFAATSRGMLLGGKMINGLAIGCIFASATSWASEISPLRLRGPIQSGIVLFMVLMQALGLVTIRLYIENISPSAFRSVFALQWIWPVAAGLAFTVMPESPIFLVQKGKITAAKKALTRLYGSNNHIDARLAVLCKQVEQERSQAEGHGNAGYLELFQGTNFKRTFTVLWLFLAAGLNGASLLSQNTYFLIIAGLPAVHAFDVGIGGFGLAIIAIVFSWFYMEKFGRRSIWLAGVAINILVLAIIGSLYYLKSNGS…
g692.t1	MKTSILLTAAALVSGIHGCFLTAHSSTVGDCHGRKSEPKNHGGARQFVNWSKDACNIKGELLNGCTVNVSSTKGCGSVSFSIWKPGRFARGFQATEAEM
g693.t1	MFYFLASLLLSHSLGVNARSQPIPIRSTGNPILADGSYFSADPAPLVVNNTLYILAGHDAAPENENSFIINEWEMFVSTSTPDPAGSEWDFYPGIIQPEDVFAWASPGTAYAAQIVEGPDGRFYLYAPVTEAQSNNADKFAIGVAVADSPLGPFKDAHASGPVLSQSKPAPGNDIQNIDPTILVDDDGKIYVYYGTFGDLRGYQFESDMVTPIGEVTTVSTLTGFFEAPWLMKRNGTYYMLYAANNAGPDSPCTPTSYHACIAYGTASSPLGPWTFRGVLLDIVSSTTSHPGAVEFNGSWFLVYHTADADTGGNFRRSVAFDEMTFDDAQTPPGINKVVQTRRPPRPSRPTRNVAPLAKASSANTTPIQYWIAAVNDEKIPSNPLPPEYWSSYADEQSP…
g694.t1	MIPGLSESDKESKNYTPFQADLSSPDIVKHAVQQSGATSAFAYTIFDSADNMRSIVDALRKAEVEHMIILPSGSVKGPAEDGGNMRNLRPKSH
g695.t1	MQLSILVLSAVGGIVNALPTTLSPIELRSDGRAATLFKHPDLATINADSTFVPANAYCTDISNIFGGFDGNIRSLSVEEGFKCDFYKEAGCGVNDFTSGGAVLEVGFKNKKDERKQLGSWETKIASVICQRL
g696.t1	MSPTERTPLLGGNPLPFLSSDFIGNGSNSKKDIHQQFCLLVGVPPSNGPKDIPRRSDFKRTLYGRAVHKRNTQNATYLFTAALSNTLLLTQVVLGAALTALGASESSHILITVFGALNTIIAGLVAYLKSRGQPMRARMFRDDLDRVVDEMENSEVMWLGIQQGVHGYDEIAIEDTVSVRSEVARLTRLLDKAVRSNTMNDPDMYMNAVGEGANAALRARPIQPEVISAPESSPSATGNASGPANAAAPAPTADPDASPASAPPKQKSQPSSPPPELADEQAEPVKPVKEATTPIPAPSFSSIVAVDAPPKIDAVKLADKSVNGEPVNNENDVEGTQAGEGGETNGEGSQSASTEEGDDRLVKKGEQNLDGV
g697.t1	MRTHRQAAELLFVEHHSASSSKTLAAITSAPRTLHLAPEPPQPLVSTLERRAHGEAATGTGASAAPPLTLNWVFVSCVIQRASRCSNHLLLPAISVLHAPRHACHTLVTSPPLLKSRRLLYLCCPHRYLVSNMPIFHDPHESPPQQSASRQMSSDKAQRGGESTPTHHVAPLDSLRAHGATGSGMICESASHETRPRSRDRNELMERIKRVKSPLWQLGQDQTSSHNHCRYSSRPSSQDRPKTPATPSADRQAPRETTPEHPVDHVSAGLEIARPRSALHAGDFRERSACVGTGQAPPAFLATSPVVPWDRSFPVAAVPPPRNTAHHPFHNALSYDPPPVSRARAISQSPSTSFTLMPPTSPLVQQVNNTDLDSSSRPSSRRGSRSPDRSNRRHTFSPD…
g698.t1	MAEKRARDGDAARAVKKQKKGFQIGPANLPDSTHRRKVKKIKEDIIYKAKLKKQYAKIKSREAQAEDAPRKSVYEREAEVAADTDEPTAPVPEPTLEPHPDRVKMLEEPEKEPVVSSFDRRQRRPRSQPFQKEAEVARKKKDEAEARQKAREDADRERTKKIAERERFRKAMAKARGGPNGQRKLGRESQVLLEKAQRLMGKS
g699.t1	MTNSERQPRRWSLAEDQILREQVEVQQTEGGGKDWCRVASALPGRTNKDCRKRWHNSVAEGLNKGQWSRPEDQLLLNGVHQYGSQWTKVATCVSSRSADQCAKRWQQSLDPRLDRSEWREDEDLVLITAVNRLGRHWKDIQQQHLPYRSKNCVKNRYSVLSRRMATKLVLYDDGLESSSSDPGTPPQTEAEMPLGHTPMILIHQNQQAPYMQGSVLDTSGDELSWTWSGLSNPNVLMTPRHHESLNMHTWPTQYSGGDNSLHPTNHSGWYDAQTNTASQYPAQYSSTSYPSTQGHMTSPRQTHVPPSHFYASTFPPNTPSTRQPTSTANIPWSGYRYRDTAPFG
g700.t1	MESPSFDHLHVDVNDEQDPLPKRYRSRSSGYIDHLEEQARWDRRDREHQLKRYRESKKSPWTNHGSTSQRLVVPVFETARGRGPGRRGSNGTQRNESPRAFHEEEVRPGTRQMRNSDLNQGGSAPPPPPPPPQMSSRPMSQIYGGIGYVPIYIPPAAPVQPSDLVSKAEKSRIKVAILDTGLENTTSDQNDDKDDHGTMLRHLETGNKYGPNLGYDDILEPALNSDLLLLSPRSARSSLTGPSLSTPATLRCPVESCDSEFHGTYRKGNLTEHVRRAHTEFAFKYQCKSPGCEKLYKRQDGLLRHHMRKHPELAVAPVPTRWQFELSPKKDQELDPIPQNDVLDRDMPLEMSKVVEVIEKLTAIGVPDSLFAPSGGKQNSGNVITTEEQDLQGYRDEHD…
g701.t1	MIMRTSQVLLWFGLAELHQSVDGLPATFCIEASRDIYNPGSEAAGYHQHPRAEVKLGRGLGRRAPPKKGGVTPPKAPVVVPVPQTPVGKGNAKSNTPGAPDKDKDGKGKAPSKKGKFRVYKLGKCGSEDARDEIKNIDSEGNSPPKKRKTSKPPKTPKAPKLKNRPDNDGDDDYVKPHVSVTNLLSVFPGGEFHKGEMLLLPGRLNNKKAPLFSVREHNVMSPVDFPNYSLHRKIHELREIVLLIEYLNSSDVAKYFKTLSLRIQDRLAKIDADGNDAFVRDIDDWWFKQKNNRALKDAPGEQYKSLKLGGRKDVCGAAERNREDLQGQLRDSNEGAEKKNIKKAVKVQAYVIGSVSSPNTSNVSDSEPFPEDDGNSDSDALPESPTRPRPAPGQGQPM…
g702.t1	MRLTAAQNEHARFFREVKAIWEELASWGDDLRVEVVFFNVAGFSVYKFVGPDVCSEDFSTLLDFSSLPKSPLLPSVKSLWVREETNEEIDLWPTKVTCSVASSLPTLECLKTVGVDYEVQWPMARRSLRRTLAEQISRLPASLKTLYICLRYGGIENHEVQPPNLLGGNLDSLTMMRLPLLVSQAGPTFESLTLAPALKDHPGIIGSVPPQVILSTSLGAWPVRRFLTRPEPAFFDELAVSMARAVSSMPKLEYLDLEFNASHQGALKPDVTNYNQAPTRYGGFRPHLHQYEGWTFYFCASNEAKFASKYSRPYWFEHKPGLDRTDIERPRTEWVFQCPHGHLEWEEPEVAKVLWREKCPHIDFDVVALDGVGTSWERRRNGNLVPLLGKGFATKFPEM…
g703.t1	MAPLLKVKYIWIDSLCIKQDDLEDWNTKSAKMADIYQGAYITLSATASSGDAYGCFAFTPQSLNDVEIQLPDGLRPIKIAVYKAVIHWDEDTPRAMRDRFLLMTRGWAYQERLLSRRVLHLIKTELVWECRSLVTCECKWLSQRSSPGGNFEQSLEARKGEQRANTGHQLQLNQTSEDWLIIEWIQNATNEKEQERMRRSKKLSQKDKPPKERRRRRKRPFAPQTERSEALSWFDFFTITVEEWGNPKADKLANKLATYLADVRECADYGLHFHRVIETYSGLRLTKRSDRLIALSGVCNFVQGIRGKYAAGLWKHSLCFDLLWRVERLDVDVVENDDSASYHGQSWSWVSVNCTVVYWTVIIDSSMPHDCFDLPVKKKTDDSMHSSRRQLALHGVSQM…
g704.t1	MILAPRFHRIAGSAASRFSKDFISTSSKHICCPSVSRGLTTSSVAFSGLLPSPQPYTFPASSSSRPSIQRQKGGQRLLDSNARCISVEAPHEPKVGSEPGININDKDAWPQWREKVQSQITAVDFSIDRIEKYELDNSTLEDFLAKPREDWVTCRWINVNGLSWDVVRLLGEKQKLHGLAIEDLLHTRNRTKADWYPEHVFGAYIMLDFPTNTCPDEQAVLLTLQRLISKSENSADGKTPRTPQPRYISTSSPAYREKHVPDQYRQAVKTLQAYRTNVDPERTRYMEEHSTLNPKGLMVSVEQVSMFLQSNNTLVSFFEHSADVIEEPILKRLQSSETVLRQSGDASMVMHAIIDGIVDLAIPIATAYEDSIAELELDVLTDPSIAHSKALYILTSELS…
g705.t1	MSSNDYYGGQGHGYDGAHQQQQQGYGGYSQQQQHPPAPAYGQPQHEQYGQSHSPYPQQQGHYPPPAQDQYGQAPQQHGYGAPQGQHDQGHDASRGHSPYPPPAQHQQYHDPNQHYGQQQYGQQQHGYGDQPHQPQGYNQQHGQYAQPGAPGAPGGPADGERGLGSTLMGGAGGAFLGNKMGGGALGTIGGLIAGAVGANVLSDKVEDKKKHKKHKKHSSHGSHHSSSHGGSSAGIGGLYAGSAHGHGHKKHKHRSHSRGGSSSSSSDSD
g706.t1	MGDVLLQFFRKTLPDELAAVLEDVLKATETADLLTLSQLPEVQILLGHKDNDATKDVKREDFTLWSDYIFHRLGLLFPFRTEEEGTPVKETLAYRVHLLWAVAVASLYAFVQSTVTGPPLSYKPAEILFSKGVSGDATAVRKIQQDLIASMTLDGVAAYKLTPNIELLCLADTILINPVFQKFIELSAWARLRVAFTYQRLLSEPAPSLQTIIYEDLKTVEKLVKESANAQGVQDLHPSFLLERAAVHTHHGLDKQARADLDEATAERKFEFALTGLMGKRTKFQQKDTSQLLVLARSAGTKSKAAATEASGPMALDLNDDTLHETIQFTEKVASMDIKDETKLPPSLAELEPANQPLLQPLDSVILLSLAESIKNTNPADGITREQTVPYAERVLEGG…
g707.t1	MSSDSAPRMVRVLAPRMSPIVTDGTVSIVLTDDYRLSPYMRDGDPDTNMPRTIIPEKLTTRSASVPLQYALGINLDAAKIWLEESLPDGFRAMDPNWVLFFDCNPDLMLARSFFPLHHTWHGFMERLLGANYDSALIARLIKNHTNKGRDYKPSSSFGTDSWEVKIGNRKTDDCAHHDWNLVSLAKGVVQLPTGTDRRHRRMAVEHAKAEGNTELMLSKLPAYSISVTQMAKNPPNKFPAAIIALKRVVLKDTNSNVSCAAMESTPTATEGEIVDRGYLYGIARIIRVEKQCQYSNDKIN
g708.t1	MTTKTVPTLTLEGARIALAAAEQRAKEINVPMNIAIVDHATHLLNFARMEGAKFTSINIAIDKAFTAAGHKAPTSVYKENVWPGGPAYGINHTNGGRFNTIGGGLPIVLDGVVVGAIGCSTGTPAQDEDVSTAGKKAVEKSFGLKAKL
g709.t1	MSGIICAWAANMSQSSTQWYEDEYIPSTTSKLAQHALHCELVGTGLGAEVDGIGTQEAPWKWLTLYEVDDANKATAATYDESNRPAMAGGLEHARLDVRTYEELKRWQADDWEGEYADIASVAVMEWQVEEGREKEVLDFYKAEAAPTIASSPEVLRFRMFKIQNATVFKAGLYETLGKETTHTYLTVAELEREEWPWDVVVVLGENPKWREYFDSQKAVKWQSSHYLVKRSYPDPDEDGKDI
g710.t1	MVCRNEHPTDTNSVGLTAMLCELRLERIAQTWRDRCTVKHNIWANEYNRRIEEKKAQEEDDKMFIEKCTVWWKECRELANQLRALFHKFRTNHPVTPADWEALTAGKERKVFAVLSTCYPKETWPRSVPYLNLIAHALYEEEEDDRRLWYMEQYLVAMEDIRRRGEEVLGTKRIMGNSSARISFQAPLTEAQVLENRETLRVKKQQLQADKAQFFAELYDFILARLHGHVVLDGGWDVDVWAESVLEEIGIIATDEVKEHVVHFVHQMSDEPIDESEDMANVAFEQDINCEGEFFLPYDV
g711.t1	MSSNNNLYDPDQDAVNTRWIQPWSEAFRAQRDVGLRIPIDFHTLAAVSLTQACFVDNQFEHNAFQKCFSNLLGVGFPRFEVDVYWDALRSVWSLCPVELPLNDTEVQSDAPVISGPTISVSTGTANARVPETTATMPAPLKVRQGGSASSQSELSSVTVENPLPSSSPGPTSPSAQPTIISFPTVKGPPILQIGRYNCTSQMTLGLLTGLLEDFLDKTSTTTGAFVTFLNLNIHAAATLSNPNGPAPQLTEDQVPKSGDLLSDIVNGNLSSVLYSPKTLAEQRANLNSSWYDVEWENLPAQGYYESSQNSAGNIFTQSGWPTEVLMEFQDLKRLITSYGTVDDQMTAYDISGDLEDIFPPGTITNQRPVLFDTTGQISSGCYFPSVENTITLQTNSSFA…
g712.t1	MKEEAVYPSTSPEASSSSLTPGGGPPKKKQKRNKPTLSCEECVERKTKCDRSRPHCLACIKRQSVCKYSVIANLIATSQDGDGAARNSGRPRKQQQKPAQLQLGSDTQSHPLPLQAHAQVPTPVRAQYRSVSLSSSGSSPFLLSNVPFSSRAPQPFFGLGSEHPFANYWTSRGGIAEVVGVLPAKEQADILVDKYFDAVDPVYPMIHRRNFYADYERFWAMSPEERQVADPVVVALHFVVYAMGTQFIHTPSNHERAQIAEFYVSAAQQALRLSSYLSRASVRTLQAMVLIGYFLMNDNHASDAWAFGGVLVRQAYAMGLHRDPDVIASRCSRSDKQQRRKLWQAIFFQDTFLTVLLKLPPTTTFSDVRPESLGDELDDYAMPNGSSNGSTDTAINPMS…
g713.t1	MNHSESTDSTPKTSSLPRPVEVKLSESLNSSPIVLPTPSVTSEMDHIFLEGSNMETNQDQTEIQVAETTPNSEPESMIAPPPSPPTVNEESKVTIAATGAKKVRTEKNKPAKKSSKTSKPKNTESSDSDTRDAESESENSVDHEKGKRKKKRKAAVKTQETRRSKIKAKLKKRKSKRRIKKADLSDDSSDDTCGTSIESGLDTTSDSETDGNRTRRSSHKTHKAKSKSKRKSKRNETSSDDDESELSSNTSSSSDSDSTSDDVKAERKRAKTKRRVKKLVEFVASASESEDAPLSPGVILEFPVPGDDINTQVAKMDAILRSLKTEQLAATNAATVGITPRLPKSLAKKNAHEFKRIDQVWDTKLRDYKLIESTADQKDEFECVFTVRRRFNWEGKHHE…
g714.t1	MASILRQIVAGPRARHAEAGLDLCYVTDNIIATSGPSGTYPQRAYRNPLDSLVKFLDSKHGDNWAIWEFRAEGTGYPDSEVYNRVYHYPFPDHHPPPFALIPNIMASMRNWLKEKEGRVVVVHCKAGKGRSGTASCSYLMSEEGWPMEKALQRFTERRMRPGMGYKGVSIPSQLRWLTYVDRWAKHGKMYVERQVEVLEVHCWGLRDGVKIQIEGFVEDGKLIKNFHTFTTEEREVVRGEVKTTGMAQAVHEVMYKNGLSGSSGKANAQQDGNKDTSQNASSSSLEVTRDADGTATPQVSSKESLLPGTGDVVFRPSKRVVLPTNDMNIDVERRSKAAFDLTMVTAVAHVWFNTFFEGNGAEKNGMADDSGVFEINWDAMDGIKGSSRKGTQAFEHIAV…
g715.t1	MSSSTKYLVHADASLFQPQHTCMFRYLTKRAMTSAYYLAKPPSSPFSGQSQMASSVPLDEIPTLTLLYKLKKIEPAADSASTYKPNATYNDRISIIRQDITTLAVDSIVNAANTSLLGGGGVDGAIHRAAGPELLDECGTLGGCETGSAKITDGYELPADKIIHAVGPIYWNKSKDEAARLLAKCYTTSLQLAVNNECKSIAFSALSTGVYGYPSGEASLVALETVRKFLEEGEKADKLDRVVFCNFLQKDEDAYFKNIPTFFPPITEVHANADNGCTEDEEEHTTEAITEILSQLPDAPTDEPVDIDDAKLPSQKKQKTEEVLDDDFVVVNKETTDGAKPKAEL
g716.t1	MGCFTTHASGTLDPPQVRNWRLHVIACIASMSALAMGYDTAVIGGTMALDSFRRDFGTVNIPQTQRDTIQGNIVSTFQAGCFFGALLAFPLAEKLGRKKTMIIASSVFLLGGTLMTAARGSLNMIYCGRAVAGLGIGASSMTVPVYIAEIAPPSVRGRLIGIFEIASQGGGMLGFWINYACDRSIDVNSQAQWTVPLAIQLIPGLLLLLGVAWCPESPRWLARGDNFEGAEKILTKLRNLDSSHAYIQHEMSEIRAQVEERSTNRMSKKAQFKKLFQKGVRNRMAIGLALMFLQSFTGVNIITYYAPRIFETLGISGTSLKLFSTGFYGIAKTLGMCTFTFVVVERVGRRKGLIWGAALGCIPMWYIGGYVMKADPAAAAAAGNINRDGWGYLAMVCVY…
g717.t1	MSAEQERVKLFSSASKIASYEAETPENWKARYNDTPLRRILLRQTSGKQHNEHENTIKQDCFTAQRNSTSTPTPRSNTPLRRILSRQVSHHTITTKDDDELSERADSVISPSSLVRSRSTQGPATVHLTSEDQIRAYQEEIWRKSATISSVGNYQKQLQEQEKQGLSAVQIIVTELTADTNRSRRFIVDSKGSPLKRILQRQNSKDWKAPARVAAV
g718.t1	MTSKTALMALRFGARTAQRTAVRTFVLPAKEANMGLRNLTTTPRNIGGFQKQSAINIAGQISQRRYISERPDGRGRLYEFDDILSILENPSDSRLLIDVREPHEFDANTIPTAINLPITSHPDALLLSASEFQDQFGFAKPPTNKEVVFFCKAGVRSRAAAGIARQAGYTNVGEYMGSWNDWEKRGGPGTKSPPEAGGLGERTGPVTETKISGGKTSGEEDIGEQGVPQPPKGGQFGRQ
g719.t1	MHKISNFTGQARHGWEKMTPSAGFPFSRSNHEMPVTASIKRPPTATSAPPVIPPGTQVNLSFNVPFSSNLAGPDPDDMMWASPGAKARWTMPEGTAEATPTHKLPVHAQNVDNLRALCRDVSEQTEGRVSATVVSAESKPLPGLQRGPLRALVTNVCLSGELEIVNSMRCKILNSTPISLRSSFVDIDSDLIIDRPTQNIKAAVLNQLDLISKTTKADIFLLMPKTPDIESASFNGNLDSTMDPRLRCAIYGDLETMEHAKTRVLIMIDQILKRYVDTMKLELTMHTLICGRGRKNIKMIESATGTAIYFPPPFPRLFGYTPPGAQRRPDDLVYITGENSECILRAKQRLHDLVMSTKVFVKPVMVTDTKLDAILLERLDKVRKIIENNGSYILLPPLG…
g720.t1	MSTIATALPHINGTGVVSAEAHREVDFLRQILQIRDDVFASKHPRIHLPPKVIEQVAPRPPQTTPPSRPSTNGIANGTGASQLFPPRPDNSLQQTAQAHEFVSPTQPIQRPYSAKSASSGIDPVLLTKSDHLIRAELQLKRQQIERLLKDQFDKKGRGNDNEEREAHFNVEECLIQAHLRVPPVSGLQPTTNNSDGAESFDENSYYSSKADSWSSEDVDVNQTSIADATGSLVSQGKQLVKHVLDQSRPNEPTVIDLDEEAYEPTDDIEIYEPEQVDLGDDADEEDYSPPPADIGPSEPSRGRARDRGFGNGDANGSRRNSPSGPAPPLQNPRKRRREEKRQEKRREQQANKRVVRSPEPYIKEEPQSPPPLAESQPSKRRALQPLPNDIEMMSPRGDT…
g721.t1	MAQENEKPVFFFDIDNCLYPKNKYFQTHLELSQKEANELHYKYYREYGLAIEGLVRHHRINALDYNKQVDDALPLDDVIKPDLELRKLIEDIDTSKVRLWLFTNAYVTHGKRVVKLLKIDDLFEGMTYCDYSSDRFVCKPQAEMFDEAMEQAGVTDNQKCYFVDDSYINCKAAHERGWKVAHYLDPGMEPPPQQAAKHQIRDLQELRKTFPEVFKGS
g722.t1	MFQTMSPAPTPTSAEPAPHPSALPPSTHDVPSTTQQSNDTHDEELSASKVKPQRKPLLRLELRDLSSDGSRAFLRLVHASSALESAVNTVLRLLYTNVEKSCIPPTRSITLVIRDMDGVAYTTGLDIDDDHKEIHFSTKYIEHVTESRQKEEINGVLLHEMVHCWQHHGGNTAPGGLTEGVADWVRLKAGYAPPHWRRRGDCDWDAGYERTAYFLEWLEREHGEDIVRKINQALRGCRYDAKKLWHDCCGKSIEGLWEEYKKSLDCDDGESKATCTDAGKAEESTHKEEEKQEDEQEGKQAERQQSQEGPTEPAEDHMTPREKARRGGNMMVPVRPGAL
g723.t1	MYRKGWRNEKGKFKRPRKLSSIRRAQYQHQPQHRRHLRLITIVTTKKKKKKKKKKKKKKKKKKKKEEEYMGTSVKGGSRTFCLAPRYRRARAPKPVGERHTANRAVLHSVWTYEKQCRVGLQILLKHVQLSVRSTLISAFLHLTFTFRLIVGEFHKMLGGRPLDWISDKPGQSKMITDIKRLLEQLLTCLGTTQVTNCIEAFNSLTTRR
g724.t1	MVDIKPLPPSATAEGETAALQAQIIDAGTRDKDGVAKTAETSLDVKPESKKASDAGLKNYFRVFKYGTVLDYFLIALCCLTSIGSGVAMPLMNIVFGQLVGNFTNYFIPGTSVTREEFQADINKLSLYILYLFIAKFVLSYVSMLCIRISGLRMSAALRLAYLRALFAQSVAMIDTISPGKVSTRITTSSNTVQLAISQHFAMFFQSLAFTIGLYVVSFVKGWLLTLVASAALPFILVIYGLIVPPFIKIQKVTAKHLEDASAMAFEMFSSVRVVVAFGAEAKLARLHELAVAKAGENEKKAAPLMGLMMAPQMMAMYGTFGLTFWYGIKRASEGHGNVGDITVVLFSVMMAVMNIGRLAAPIMAITKAATAATELFVTIDAPLANISGLREPEITADA…
g725.t1	MTAIPTDDVEVQKPQTSPSNDPTAPQHQQALQIHQPSQETTHKPQHENQQPKRWRIWHKWADGSETSWWFASTGIPLLAATLGPLANVSSIAALVTSWRQNNYLDGQFVSDLFGVPYADPRWCYWLNVVSLICGFLGNVFLLCNFTQKIRYIVALPATILFWYISSGLLTAITASMEIYAPPNRPYEIYTQGYWYAVAAAVFYFVCSVLLMVNMLGYYLGHYPDHFALSDSQRTLILQTMFFFVWIAGGAAMYSKIQTDAGDDQWTFPNSLYFCYVTILTVGFGDLVATTDLGRGLLFPYAVGGIITLGLIVASLYRAARELGENHIVQKDIRRRREHALELTVANSYEYRDRERQLVRKGTLGRLKISGPSAPRPYRTPMGTNGQPNPSFPLKLGVPL…
g726.t1	MFAAARPSVLRSARAQLRQSQTQSQSHAAWARLASTLAVLEAKEGKLNIASLAAITAGTKLGGSVTAFVAGSAGKALAEQAGKAQGIEKVIYVDNAAYDRGLAENWAPLLVDNIKKGGYTHVLTGHSAFGKNLMPRVAALLDVQQISDITAIESEDTFVRPIYAGNAIMTVQSSDTTKIITVRGTAFPAPDPEGGSAAVEEGTDPKAECPTEWVSEDLAKSDRPDLGSATKVVSGGRGLKSKEEFDKLMPPLADALGAAIGASRAAVDSGFADNSLQVGQTGKNVAPQLYLCAGISGAIQHLAGMKDSKVIAAINKDPDAPIFQVADVGLVGDLFDKVPELTEKLKQ
g727.t1	MSDDAAASATAQDPSLAAEGAAQANALDQGTSPSTGHSRPSTVDRPQSTVHTACAHPVHPVHPVHPVHPVHPVHPVHPVHPVHPVHPVHPVGAMRTLHPLDGFDLHEHRGLDDPPADDSSPPADSDLSTPPRLVLTPDADTAMLDEPPAKESSREPSAATPAPASDNPLDAPDGPRPDAEDADGHDDEDMGGLDDAKKEKDPDAAGAEADADAEADAADPEAAAKADLQAAARSHFVAQTYATIIPSYATWFDMRYIDYRERKALPEFFNGRNRSKTPAVYRDYRDFMINTYRLNPSEYLTVTACRRNLAGDVCAIMRVHAFLEQWGLINYQVPTVQSCTPNPKPQTPTHPTNPFQVDPQERPSNIGPPFTGHFRVTVDTPRGLQPFQPGPGAKLTDGK…
g728.t1	MFRSAPGLIARSSALRTLPRAAPPARRFISTAPPAQKSRSWKSLVARLGLAGTIVYYYNTTDVFAEEPRQRAPALPATEVESETLPTIESIAAERAQRKAVQQQLEAQRQKEASAAEEAARAQPSSAEPQEGGIEGLEAEADQQGAFNPETGEINWDCPCLGGMATGPCGDEFKAAFSCFVYSKEEPKGMDCIDKFKDMQNCFRQYPEIYGSEIDTDDDDDMTADAAADVSTPSDSTPQPALSGETNTDAPAPVKKESKSKSVAPSGPHSADKVAENRRELGLVPENYRPEEKEVKKQEPVSESESLVPKAAHDGR
g729.t1	MKFLREEPAMPSQPPSPTDWAAHFKARDAAYHTCTARTVTRYYRFDGRVVVKYGQREYYCVNPDADIDTDTDTDTDTDTDTDTDTDTDTDTDTDTDTDTDTDTDTDTDTDRTPAPPSSSLNSAPANSTPETNDANHPDKRCSSDTPAAASAADDKAHDRANDAADDDNGVGANSNTDSLLTSLALSAHHAFDASMNARDRRNRGRWIGETRLAELKGGRVPVASGGVGHGEVEVETLKLYDLSLQSKDCEDGEGRGNVVGLKGRRDSLAGGDEGRDV
g730.t1	MRPSPPTAPSPGRDLSVSTPDCLAAPPPEHGVAVNDRLQGTAAGTPHWKEAKRRSEQAHVPFQRPATTRRQPSTSAPTDPPTAMALSNEKTCPTAAGPPAKDITSDSMVEGQNGRWRLRLRNPWACSPYTLLTTLLGLAALFLMVQSFLTRQLDTKGCEMSYMRPIFHKFDDFDTEHTRFASKYSLYLYREGGIDDDSRVKGVPVLFIPGNAGSYKQVRPLGAEAAYHYHNALRHDVAASRAGKKPLDFFTVDFNEDFTAFHGQTLLDQAEYLNDAITFILSLYHTPGRSARDSNLPDPTSVVILGHSMGGMVARTMLTMPNYQSNSINTIVTLAAPHARPPVSFDGDIVRLYKGVNDYWRHAYSQKWAIDNPLWHVTLISIAGGGLDTVVSSDYASIA…
g731.t1	MSKQEMQTDGSEKPYSIDHYPIFSYAAKPAVYFPVHYFEKGVYTDKEQYLNLDLYEATLNGLNLSDAHRACVAEKKNAVTAVVIVSEDVGAWALERHKGKRRSLWAHLNHRYEANSLQRKSLNERPNGGVEAWGKPTTTPSHEHIPREVRREQRLAKCNRMRTHRPIDLELEAKFAHLRTDAPKLKSLQQNEAWAHEQLKLSNEARIRDKALGFKYRLRMSLNAEVPESAGMVDERKSCFARRDGERKWKVVRFDDVHMAKKVRWADVEHLQELEEELGQPEYGDTSS
g732.t1	MADQANRPHRKVKEKKAHSGGPNPKAFAYAAPGRLAKQGARSQDVREKRLHVPLVDRLPEEAPPIIVAVVGPSGVGKTTLIKSLIRRYTKQTLSSPSGPLTVVTSKRRRLTFIECPSDSLASMIDIAKVVDICLLMIDGNYGFEMETMEFLNVLSSSGMPGNVFGILTHLDLFRKQETLKLQKKRLKHRFWSELYQGAKLFYLSGVVNGRYPDREVMNLSRFLSVMKNPRPLVWRNTHPYCLADRFLDITPPTDIEQDSKCDRTIALYGYLRGTNFPAGGSRVHVPGVGDLTVTSTEALPDPCPTPYFEKQAEKLTGKKKRTRLGEKQKILYAPMSDVGGVLVDKDAVYIDVKTNTFNPDEEPNQERGLGEQMMIGLQGGRKLLGEDDRGFRLFSGGEL…
g733.t1	MPTTYNVTLKPEASPEELQNAKKEVESKGGKITHEFSLIKGFTAELPDDLVSTFESNDKITVEKDSEVTTQ
g734.t1	MLSADSAQVVLFPRKVRAPRERWGYKLLFEVFNADSCRVRRHGRPPLTTQQLLTSANFTLSILPARLAHRIQSLRNLPFIVVSNPHVSKIHANYIHSLSTLLPWAEHEITSLEDEIKFTEVMADLVQTHANTISILARGFLEARKYISPRDVTRFLDEHLRARIGTRLIAEQHLSLHFSSQPHAEIMHESDEAPGFIGVIDTKLKPARIVDHCANVVGEICELKYGVRPSIVINGEPDYTFAHVPAHLEYIMTELLKNAFRATVESGQEREPIEVTIAPKDLHEEASDHEDYSRINSSLSNTNQGNTDIASQSFTGALTSSSPKSDAQILPLKHSTPGVTIRIRDRGGGISPENLAHIWDYSFTTFNEDKASTTLTGGGSGSGMDALNAMTGPGGDGAH…
g735.t1	MPASLFSMLPSELICRVFESATDFSTVVALAQTARVFYDTWREYPTAICRAVIPHAILNLDDAQQLLDMQQEAEATSEMECDQKQKSIVRAKRLLSNARCASAASKEWVHNSRFGAYFEREVRPREIARFEHAFYCVWAIGIMGTTPHLQHEASAFLDNCSPRELCRLEEQAQFSYAYDKEFFESLGLAFNGEVWECARDLVPERWQEVGRNRWWGSMRVPMRTTFVGFYAFYDETQQYLERIPDEVDSTFWDRTD
g736.t1	MNFSNDALPAHYGLNFTSTFHSKIPANIDPSSVTLPRPFIIVVTGAGKGLGYHISLAFARAGCSGIAISSRTSSDLDTLECEITKIASSKKTAIEVLKMICDVQSSSSVTDLENAVRAKWGRVDVVIANAGVMSKYTEPPSSSSESKSNLPQGLVQDDDWARVMNINLNGVWRVSRAFLPLLSESKDGPQTLISSCSMAAHSVVSELTPVAYNMSKMGVMRLMECVANDHGREGVQAFALHPGAVVTPQTKNHAGDAWSAILADDEGLAGAFCVWLSREKRSWLSGRFVSCNWDVEELQGMRGRIEEYDWLKYRMVV
g737.t1	MVHYAILASALLSIAAAQSLGKGKEVHPKLTTYECTKKGGCKAQDSYIVLDAAVHSIHQKNDTTKGCGDWGKAADPTACPDEKTCAKNCILEPISNYADYGITTKGASLRMDFYGKDKKFQSPRAYLLAKGEKNYEMLKLTGKEFTFDVDVSKLPCGMNGALYLSEMRADGGRSSLNPAGAAYGTGYCDAQCFVTPFVNGVGNIDGSGVCCNEMDIWEANSRSTQIAPHTCSKPSLFKCQGAECGATGLCDKNGCGKNSYRNGVKDFYGLGLKIDTKKPFSVVTQFPAKNGVLQSIERKYIQNGIVFEDQPKNITMNDAYCSTQGADTFMKLGAMKGMGEALSRGMVLAMSVWWDEGGFMQWLDGGEAGPCDATEGDPKNIVKVQPAPSTTFSNIKWGE…
g738.t1	MTPATTTSPSNYASKSIVELRPVPPAALRDSGRLRSEDRSKNTDPAEFLPQPSTTVSVVERWNSSKVNIFRTAATLFAFVIMGANDAAYGAIIPYLEKYYDLSYVIVSLVFLSPLGGYVGAALLNNWIHVRFGQRGVAFLGPFCHLAAYVAISLHPHYPVLVVIFIIAGFGNGIEDAAWNAWAGNMANANEVLGFLHGCYGLGAVLSPLAATTLMTKSGWMWYEFYYIMIGGAAIELATSMTAFWPMSGQTYREANPRINAASESRLREALRSRVTWVSSIFLLGYVGAEVALGGWIVTFMRRERGGGDFESGMVATGFWTGITVGRLVLGFVTPRLGEKFAVLTYIIFAMVCQLMFWLVPSFHVSAIFVALQGFFLGPLFPAIIVAATKVLPAYLHVS…
g739.t1	MNALFNSALRQSTSIRKDLDQFADSASPSPQLQAQLNASLATFTRTVDDYGKLAKQEPVQTKQEKAFERLKNFRAELEEYRESFKRIKSANEDVRTTEARTELLGRRPHHTATPENPYAQSNINASAHSAFAPSQPFNPNAPYRPNPYSAGASQGGDYDREGHVLRENTFFNQTSNQLDEFLDRGRSVLGDLGQQREMLKGTQKRLYSVANTLGISGDTIRMVERRAKQDKWIFYGGVVVFFLFCWLVIHYLR
g740.t1	MPSSRLSGYEDWNDWVDEIDNGDIINYITHELRSREIYLSESDIRQGLEELNSLSLSRASHHFGDAREDQLMNIMKRALAKDLDSNGSQGLYRSRSRFLTFCFVARRLGSKELAGVLLRFFVRAESNILDGEKSFLLTEWCLALQQLESLVSDDRLNDAFGRIAKLGPPLFEEWRRPGPHHSWIMDMLRFFNEMNRHDHGRGRDQLQVIAPHDLPPRRLSVPPLRRPFTVDIPPYPRTVYNTPMISPRHGVAGLHLQQQMHAFELNRLRRDMDDIRYRQ
g741.t1	MASHVAQPKAFTFQHAELGEMTGLITPDNVVQFRAIPYATIPARFKQSIPLNDLGHTNRRFTEHGFACPQTFPDRAADGGRFVNEGSPPPSDEFHCLVLHVNVPLVALQHPPRARLPVLLYIHGGGFVLGAIDEQHNTALLVEQSLLDARPVVGVAIQYRLGALGYLHVPERGGANLALNDQRNALVWVQRFVGGFGGDREAVTVFGESAGAVSICAHLLSEPPELGPLFRRAVVMSGVIGPVTAPVGVGEAEGQYEALLEILGIHEEGEAGLERLRGVDVEQLVAATSALTEDGSMLLSVRDRAWFGEDAETVTWDRIPELIGKCEWVDAIVLGTTSFEGTMTATRYASITPSAFLSSIEAQLGAPAASTISRAYGITASMDQNLFLTSMLRWVGDAL…
g742.t1	MHFSTAVLSTILATACAHDVHERDLPPPVAVNDMSYTSCANAAWPPSTVGTELVPQKPDDDLKAMLDELSPENIENTITKLVSFGTRHTLSTQNSTTRGIGAARDWIASEMRKYANESSGRMTVTVPSYTQGVASRIPFPVKISNILATIKGSETPDKVYIMTGHYDSRVTDVLNYEADAPGANDDASGVAIAMELARILATRQPRSTIILGAVAGEEQNLYGSTFFANTLRNASVNVEGMLNCDIVGSSTGDRGQKDPFTIRAFAQGPPSYENATVAARRLQIGGENDSPARELARFSAEVAANSATGMNVAIIYRLDRFLRGGDHSPFLAAGYPAIRYTEPNENFAHQHQDVRTENGTVYGDLIEFVDFDFTARVGKVNLATLWSMSEAPGWPRNLT…
g743.t1	MSSADESSHPRSSDNETPPDSRASSRGPSRSHTPATPRKRRRTESVERSRVRKYPLEGKYNDAYRVLFNEHVSRAAARFEPAEGVQHYSTQYGASVWSAQEQATLFAALERLGRDDVPGVARAIGTKSPTETRELLLLLGDAATKQQNLGLTMRDVPAAIELGHACAEELDVVADALAWYQEQFEVAQEQERYGHYWLITPALAQDIEAAINRPSRAASTRPTTPAEPGTPRAGPGIAGSCVRCKLHKIRCDRNVPCGNCAHVKKKVVCQYKSLHQDTRHIDLTPQTPNVEGAQEQPAELAVSTAPPIVHAIPQAALLHAENMLSLSKILFMNRSADIPSPWPHWSAYASEQVPEPSILRTAFNDFHTLAVSVTKRLMQAAIMQATSRLRSQRRRTKKG…
g744.t1	MATVVRSFAAQLHVSPCRSRADTLQAAEPCVCSHTHQTRVKNTCTTCCCRSPSSITTATTFTTFITFTTFITFTTFITFTTFITFTTFITFITFITFTTFITFTTFITFTTFITFTTATTFTTFITFTTFITFTTFITFTTFITFTTFITFTTFITFTTFITFITFTTFITFTTFTTFITFTTFITFITFTTFTTFTTTTTTITTNYCRASQDTTARRLGISLATGSGKTVIFTHLIDRIPAVDDASQTLILAHRRELVEQAARHCTLAYPDKHVDIEMGSNCASGAADITIASIQSITSGDRLRKFDPSRYKLVLVDEAHHIVSPTYLDVLEHFGLRHASDWSRGNVPALVGVSATFSRFDGRKLGAVIDHIVYHRDYVDMIEENWLSDVVFTTVETK…
g745.t1	MSEAAQKAGVPLLPPTEVQPKAQAASVPVQLPPSPPETDFDSDESKSTTSTAPTELDVPLPPPSHPQQVLDVDKPTPDAHVPRDPRLIRLTGVHPFNVEAPLSDLYNEGFLTSPDLFYVRNHGAVPEVQDEECLDWEFSVEGLVQNPLKITLRDLLQEYQNVTYPITLVCAGNRRKEQNVVRKSKGFSWGPAGVSTALFTGVVMRDVIERAKPLRKAKYVCMEGADKLPNGYYGTSVKLNWVMDPNRGIMLAHKMNGDALTPDHGKPLRAVIPGQIGGRSVKWLKRLIVTAEPSDNWYHIYDNRVLPTMVDPDESAKNPKWWMDERYAIYDLSPNAAIAFPAHEEKLSIASAPITYNVRGYAYSGGGRRITRCEVSLDKGKTWRLANIDYAEDRYRAYE…
g746.t1	MADTEPAAIITQGLDPKSGTSHSESDSPVHGTWGSKDGNISNSEWNDPEANKLPEKVAELEEKGEINDTPPQERKKVVVVGLGMVGIAFIEKLMKYDVKRREYDIVVIGEEPHLAYNRVGLTSFFQHRQVENLYLNPKEWYSSMPEGSLNYHLNTLVTEIDSANKSVKTSSGETVSYDLLVLATGSDALLPRHTPGHDAEGVFVYRTIDDLQRLIEFSATRKGTAGAVVGGGLLGLEAAHAMMDLENFAQVKLIERNRWVLSRQLDGDAGSMVVEQVRAMGLDVMLSKRVGKILTTEENAVRGVVFEDGEEMDCSCICFAIGIKARDELARKASIKCADRGGGIIVGADLSTSTPGIYAIGECASWENQTFGLIAPGVEMADVLAFNLTRAKAHAPRKF…
g747.t1	MTLPNTSDSIDAFRRARELKASALQSISVLQPDSSTSMTECSTTLAFENTLIKMFHAEGKSWVEITAHLNERRMSSSEAPTWTEAAVYSRFILSSSEPATPAREVGFEPRDYAHLRNAGSGHEGTSKAGKKRVKDFQNATELSANIRTPAKLHGKDDVEVQQVTAKGKGKAKRKSKGKDENRRKGEEEETVKMDEGLAEVLMRAVVKVERNFWVFVADEVERAGGKYIEPRHLQKVFHDI
g748.t1	MASMNCLNDDDFGPAVKGCRDNFDFTVKFELIIFSLVPSSTFVLITLLRCAQLYNRPKIVKASLFLATKLIILVTHAALQLSRLILLEVADQDVHNAVLLASSATCFLASMIVMPLSYMEHNKSRRPSILLSIYLFTTLLLDTAHARTLWLTTTSRAMSASAGILTASVAIKVLIFLLESKQKTAWLYMNSEKHSPEENSGFFDLAMFTWLKHLFLAGYSSVLTMDSLYSLDQDLSSEKMHKRLSKCLDKNLSSGPRFRLAKALGRAFLGPLLMPVPPRLVLVGFTFSQPFFLASVLNTIAQGSEVSTSRHSFGLIGAAVIIYVGIALSRALCGYFTQRSVAMIRGCLVSVLYEKTTESQILAGDDAAAITLMSTDIERIMVGLTYMHDVWAGVLEAGL…
g749.t1	MAYYHRAFHRPHRSQRQILHQPYYENHGDGLTPLPYLYDDNYSKLEQYLGEQNGVEMATRAHVDATREHEKVKEKLGEAKKKFEESEAKVKEAAEKLQKAKKLEYIKVHGYW
g750.t1	MGLLFNVVLAVFAANGSFLFGYDSGVMTIVIQSPHFLDVFNTDAESNIIGAINATFSGGAVFGSLMGGFTMDSLGRRKTIMVGAIINLVGAILQSSAQNLAMILVGRIMAGWAVGVLSMSVPIYQSECLIVGISQQMIGIGFIVSTWVGYGSSKVPVTSSFSWRFPLAFQCVPCLMIIFGIMFFPESPRYLVETDRSDEALRVLHKLHYDGNNEDWINQEFNEIKLTIDAERAITAPGWAIMFKVKTWRTRLMHATLIQIFTQMTGINVIGYYSTIMYKNLGIEGDRNLLVTSIYNVVGPIFNLIFITFILDRVGRRKPLLVGTIGISIALICEAAVGSQVEGATGSRKNGLSAAGVFFLFLVSCIFSCSFGPISWVYASEIMPLSIRGRGSAFATGIG…
g751.t1	MWLVNDRFTVQHAEEVYSVTPREDKKAVMLLAPTKKIFSRGDTLNLATLSVELEAQFDGVISLEITHHAGARRLGPDFDLFPDGRPDQTGDVKQSADGKGTTITSGSLSATVSGDEHTFDIKFHATDGSKHLTSLLNRSVGFAYSPALRTPKQVEDLSAHNHYVFTQTELSVGESIHGLGERFGAWNKVGQNVEVWNEDGGTSSEQAYKNVSFWLSSRGYGVFIDTPDKIDMEIGSERCSRLQTTVEGQRLKWYLIYGPTPKEVLTKYSILTGKANRVPAWSYGLWLSTSFTTSYDEDTVNHFVSRMSESKIPVEVFHFDCFWLRAFHWCDFVWDPESFPDAKGQIQRGKEAGLFNKVSVWTNPYVGQASPVFKYAAEKRYLLKKTNGDVWQWDLWQTG…
g752.t1	MALTILMFYTRRPDLTVAEFKKHMENKYLPIVKEVMGLHVPESTTLRYVERCSSGFGDRLGATLASKYRNNPDAPVLLVGYPKDLGWDAMVEMSFKDDLHLMQGYAATNSAEGQRLRDAEEDFTVPDAMKVVLMDRITVTDRSMG
g753.t1	MSRELTSQAEGKFFALMDLMSTASREASSLKESWARIVSERESLFKEKEELLSRVDEVTETLERTQSEHHHRGHDHGERKKQIEKLLLELSVAVTTIQEHKKKISDRDHELERTRTEIRELRTTSTSSYNEHERLKSELEAVYIKFKAVEEDRDQARDDSHRHHGELRNLLREHTDLKSRYNESHSKFETSRKEVLGLTDRIKIYELERNEHLHEKDRLQEDLKRAKHRAEESSRELYELTERHERTQRDLTKLRESVRIAEEERDEYSLTIENLRREIKAKITGWEDSEERCADITLKYEHLKREVISIKEKLRDVETRELDVKESLDRSREDHRLVVIERDQLKEDLHDQRNKDADRHRQTTMLEESLRRAEQTIADIKAEIHTVTEHNNVLIREGD…
g754.t1	MEEVYPERQRLREIATVLNIPENPEEPEQLIGESHVSEIIPSQENVNKTEDAYKAESVNEAESQLMNEMAGHRESQKEVTESTEWLPTPEDTPEPSYLLDGNREIVESSQESGSMPRGWQTLMPEAEAPDQRSNNAPRREEISSQIDEANVLTLRRQRRPLGSNLWAKRHAQGCTETGSQHPYDSGET
g755.t1	MMSQASLARFRGPVVQGNLTTSSSTSPANKIVYVTAISNLLDISQAGASDALMIYQTQPLDLHDSIVPTKIRAPVPEITVTSLDIFTAPANADISIKANAKPTKSDSGPTRGSSVLTPIPSPSTLSPAAITGIILSTVALAIALTALAIFLYLRRKSKKTEADMEAPKPEETLAEKVARGREYQRKRWSARETAMNQERFNRLKAKLAARENVVAEVDETFVIGDGEEDRDAVKKEAPIVARPGAARRPSGLAMHPPIPSDAVNMEDSDPKVGRAI
g756.t1	MTDTETPINAEDYKVGPIPLPWFIPLCIFIPTFLTMLVYFIYLHTIKKHQDKKRMAAQDEEAAGGGTKKEDEVSPGVEAQVRKFMEVEV
g757.t1	MGAAALTSPQPKTLTATAKQKRKKIPKPPSRCLSTSSNMPSTVNKTRKGHKARHKPLGLGTRPGAHKQLPIIIDGDDAIDADEVLEAGPSLASRAFSLPAGLASRIVSLTSGSSADGRKVATSVDPILGFYSSSATLLRQNHTHPDSPQRFRLQRPDEPHLFEERLCSLQSLPRAPLANKLTHQRQGQPANDPPAQPQFQSALSPVVHPRPWQGSGLSNALAPTRDPEDSSHHDRTLSVAPSFADDRSELTLADISDMYLRAKTAQLMCVAPGIPVADLYRLLNDEKGRSEAAKRALSNASQSPSNLLSLSPVALTRATTVPRTTLFAIEDHDRDEIYIKTDLNDPAFMWDNDVPATPPPEPRGLRQNSQAKLKKPTGKSFARPPVRARLSKPAVTCSS…
g758.t1	MGWHDRLVYYRDFAYGTPRLRMANGNIGHVPAATFAEYVDDPFLGNDDGDDDSDTTCGEPLSQDVDAAPGVAPDADAHHAPRPQCLAVRPALAHRLYSHRLHVRAKAKLQRDRLLSGPMIDVYVGNARRRWTLHRTLLCHHSAQLEAELEGNHDGHDARDALDALELPDHDPAGFELLVKWLYQGRLDDVSDLADATQKYEHAVHCHALYLLCHRFDMPQLKNVAMDQFRKGLHEAELVPDPDEIDDLYRKTPAGSPFRRLLVQIAARQIMDPDSNRDVETYRQCFEHNASFALELVNAIRQGSGGMLLDDPTASGNECAYHDHQDAPHCNIKAKAKAKAKQARKAKAQRADPSSARSAASTSSDPPLRPHPRPPPRALPPPPPRILPLPPPRIIPPPP…
g759.t1	MPVVNLRLSTELGWTYRYRYSEVDDVANCATSQPHDQLHDQLQMTSERRAHALDALDALDGAMSSRVETEILNKYNLTTLYPAAWPEDKDAADEGELSDDEASTEVIAGAGATTTRAAAMRRSRSRYSVLEDRSRFSRLVPGAERSKDGVETLVQKDEADALGLYPSVVQVLRARNLSVEDDVKLRNRFLLSSTTFSPSLFLSQVHSDASTDTLLQGLDFLSRSIEQKSASLKVLVETNFERFVGAKATIDRVYNEMRQQGTDADADADADADAPPRPLHAPAHTRGASRSSFSARKSSVSLQPTPSAAALTSSAPDKERKKNALVKESEYGVHGIKVPLTEVAVKAEEVWGPALGGRDKEETLKAILDALESNRGLFELGASVQDAIRRNDHDTLVDE…
g760.t1	MGVRSLVVLLLWLFAFFSVEVCGSRVDSRESTIAYIPACGLRCLFLELPASGCAPTDLACFCSNEPLEYALAACLLVNCTMQDSLETSRVQADLCNLSNDSKTQEVILYTSIVYSIAFLSVALRICGKAVSKRLAWDDVMVVAALLLTALPLGFVLDMTKKGFGEHLWNLEDNKLSPILRNCRVPPPLSLVALTGLVYISWSTYIIILCMIKISLVLFYLEIFKARRFQITAYVFIGFMVANSFAIFCVTILACNPIPSFWNRNIKGKCIDIQAGAYANSASAIIQDVILLILPLAFVKHLQMRRSRKVAVGFMFCIGTFGVIATLMRLPSLSTFQISIDPSWDYVPITIWTELELAAGFLCVSLPSIRILLVRLLPKRVKEFFLNITQSSRSKSNPTP…
g761.t1	MHGIASRRKACEDTGTLRGAPTIAAAAAGRGGSTLIPAQIPPLDKLRLLCPGFPRKPIEVHNGDAFALAQTLGSTYGKVGVLNLASDREPGGNGSCAGIMFPDVVVFKDTLNRNLVDLSIEQRHFVDVITVTAPCRPKLTDDEKGFAAELDLQDLREKILLILRLAAVNSVTNLVLGAMGCGAYRCLPRAAACEMKTALEKEEFSGWFETTSFAVYVAGSSGKHNFDIFKVFDNP
g762.t1	MADFKDPEKQPYDDNGIHTTTSFAQGTHRRASITDAVFGEINEDGPNYRAVGWKGTAVLMLKTQIGLGVLSIPSVFHSLGLIPGVIVILIIAAMTSWSNYIIGVFKLRHPDVYGIDDVGRKLFGRVGYEVFGITFALYWIFVAGSGMLGISTALNALSSHGACTAIFVAVAAIAGFCLGSIQTLGKISWLAWIGVVSILSSILILTVSVGVQDRPADAPPTPGPFHSDYELFGSPTAADAFASISSIVFAYAGTPAFFNIVSEMREPRHYTKALIVCQGTMTAVYIAIGCVVYYYCGSYVSSPALGSAGHLMKKVCYGIALPGLLVSTTLFVHFAAKYFFMRILRNSQHLTRNTPTHWITWISCTAGNAIVAYVVASAIPVFGGLVSLVGALLGTLMSI…
g763.t1	MNHQVQGLVLVDNEWVSRPLDVYQIMARAQQDDTEMLEPAVKPASHPQVPGYGILSRTVLPSPLFKFILPATIRHKDLNDIVLVGEDSIQLVQIHDYGRLRHAATKSDFSGRILTSRVFGDARAVHISGSVGIPLPKAQNMHRGTRSTNRSENHMLPPEVAVLTLSSRTLVFLWAQHSAAGKPVFRQKTVRLPAGSSRFDRLGQYLATDPKCRALAVAAYEGRFMLYKTKSMQTWHKELANGDDTTPIEDERIIAIEGRVMHMEFLSTAAGQDDFHVVLLFIVAHQGLTKMTCFDWDCRYDLDTVTARTERVLVDLDDQNPSLLIPLGRSPDFLLIFETHVCVYKDVLSGAPQRTVVPIPVHILRSIRPGDSTHRPRWVQWDKTPRNPDFPKEAFYIAR…
g764.t1	MAASRSRTPRTPSRSVSPGSPPARRSTPVDLSLADKAKEGLVTAACDEGDVAALVGLCTSTHGLVSDGLRRTAWPILLGCGNTDTDTDSETDTDTHADDLPAHREEGQVALDVNRAFVYYPKHDSEKELDHRKRELSMVILEVLRRHPALSYFQGYHDIVQVLYLVLGVRAAPRAAARLSLLRIRDFMLSSLEPAIAQLELLRPLLQHADPVLYTHLPKSSATFALAGTITMFAHNITVYKDITRLFDFFLAHHAVMPLYFFAAVVLSRREELLEIDKEDEDILHVMLSKLPEPFDIEFHIARSIELYERLPPSTLHSWEWWRISSSSVLKTSGTLADLQRLPLAAGERYFAQQEKEVCRQQFQKQLLQQASRNFKFFQSRLWHYRRFGAVSFAVAVGL…
g765.t1	MSSSLGVPPSDAEFGDPTPSGLTPNTRSEVEEAFFQNTLKQTDSAAPDSTIATDEARTAYRRPGVVRASSHNYEKALKMAHAQNSVSSNLSTHTELPDNITDEATVTSPSQSLPFPVPGQGVVPDYSAVGLAQGDTLKKSRSRGLSLGALAQQQTWNEQDYRRLYNADLMTDAKQGAGYASGTERKP
g766.t1	MEEQTAALLAALKKQASTNVDQRLNLFGSLKSSIKHQRVPESCQADILECIRLAMTAQTSAQLVTAGFSTLSHLVKRLVLQKETHVVTAHSSQLCPVLLDRLGDAREAHRSAASVLLVELYSWCHVDIDAGIHSAMTGTNPRAKDAAMTWVVKMNKNHSLPFKNYVNPLVANLEDADPEVRNVAKNAIVSLFQSVPNSALANLKKQLAVYNVRKATVTFITAQLDDPAMDDEHHEPVPAPVREPQRERALPTSRAKALQPDTGFADSLPTEQAPPTEAVPMDPIQVYTQRELEDIFRDMAPPFEGRENEQNWIGRDKNTTKLRRILMGNAPTEFHAVFMAGIKSLLDGILKVANTLRTTMSTNGCHLVQELAKTLGPAIDPWVEILLQSFIKMCAATKN…
g767.t1	MPLSSPAWFAVCPAVRGRVAGFSVCPSPRNNDNINNSNDIIINSIIIIIIINSIIIIIININTNLNINTNLNINTNININTNININTNININTNININTNINININININININNTAKKNKPVRV
g768.t1	MSPPAAIFDSPAPAVLGNGTDLKKGLAVKAAAVGHDGQAKTLAEFESNWDNFTFAPIRESQVSRAMTRRYFKDLDTYAESDIVIVGAGSCGLSTAFVLASKRPDLKIAIIEAGVAPGGGAWLGGQLFSAMIMRKPAHLFLNELGVPYEDDGDWVTVKHAALFTSTLLSKVLQFPNVKLFNATTVEDLITRPAPTREDANAVRIAGVVTNWTLVSMHHDDQSCMDPNTINAPLVVSTTGHDGPFGAFSVRRLVSMQQIEKLGGMRGLDMRTAEDAIVKRTREIVPGLIVGGMELSEVDGANRMGPTFGAMALSGVKAAEEALNVWDERSAQNAE
g769.t1	MLDPATANSPPNDCAHAHTHGHDHGHDHGHSHSHDHHGHDHHGHDHDVPPVRSCHRLSSAQLRSHPPRPPPMDSPGGYPESLLDQDGDQDDVVYPCKGCGEILEEGKAFELAGNRWHIDCFRCNTCGTLLDSDANLLLLGDGSLICNDCTYSCNHCGNKIEDLAILTGDQAFCANCFRCRNCKRKIENLRYARTSQGIFCMACHESLMARRRKKSKKPPVPAAPKVDKSLPALPPQFEDQQSQRGAFTPDVETPSEVFSEPTTAEASPRPPQPRRGDSSSNFRRDASPAAADLSRRDNILLPATTYNKDHKHSESDAGDDGILLPFALDPNPAPGPSPLSRASRQFPDRSMGSASTTGEGKSSRNDYFNRPTADPRDKLKENNSRSGSAERPAPASPHI…
g770.t1	MSYADVAASGPKQSAEEVSTEPRAPAVPQVEHTEDSVYSLVDVDSPHISSVPSDYESQSIKTDTQAARKEREEEIKNTAKEIRDSAAAKKDKAKDKARKNADNPVVLSNAVGLAVLGAALSFGAYRKYSRGELTGKVVAAWAGVVGLFGLGDYYVSQYFFQRYPPKN
g771.t1	MPVSPTNPLAPRSRPGQLVSQHISQWVTSSREYAARASSRASLSTLTRPKRSHSRPSISGPTNFRHFDGFDSIEFMDTDTSTNTRRRSFRPLQLSMYGSDGCGRLSPLPDFQREDNWTSKPSPLSMPAQARVRGSEAVTGPYFSNPSSHNIPRKPVGSGSRRSSVQSVQSMATHERRFSGSTVSTVATPALPSWDEKPRATSESVIRGSGLLRRSRTSGTSTPARVLSRLPSPSRSRANTAPTRPSSLRRANTDVDEAIRELNTIVEERRASAYHSHIQAPALSNRVPPSPSHHVPHFAPSMRMHVRSETLSDIGSAFSVPLASKPLPNPPTSSTPALRRAPNFSLYPPARNFTGPLTSNPITPPPPKTASSTSTASLHRLSNWLRRSSSRPTTLKSTM…
g772.t1	MWMRVMGWTGLPGRELGPGPPHPVWAYAHAHDHTTTSTTPGADCLTITRTPWPLATAAAAAAAAAAERLPRPPPQRHALPCLAPLPHTCSTTSIMAVGSLPDLHTAVERGTGQRFGHVVIIVAGVCALVASLVTFVAVWLQTVPIYAAASWGSLMSVQAASWIDPLRDIYEAFTIYTFLQLLINFIGGERALIILMTGRAPVSHPWPMSLFLPKLDISDPHTFLAVKRGILQYTWVKPLLALAAIIMKATGVYKEGYIDVTSGYLWSSIIYNISITLCLYALAMFWVCMTDDLQPFRPMPKFLCIKGIIFASYWQGFFLSILVWLGAIPDDVPGYSTDNLAAAIQDALICFEMPLFALAHWYAFSWHDYADNTISAARLPVKYALRDAFGPLDLIQDTK…
g773.t1	MAGGIVAEPLNPRDGFNWVFLVELLICGILTVFFFFYFNRLFATLISYAVRAYTWRNFHAYIDITGLQISPLGGRIFFKDIRYHGHNETILVHGGYITWNYWLRRVRDAAVYAGSDASADPDSRRASSASDAPSTSRSRNVDKAEKGGKQTPKQLPCRISVKISGVEAFMYNRSPAYDGIVDAFQRKAHANTEPSTEPCSSASHATRSSSVSQSDGSSHDEEHHHKKLRKDPPAQEENVQRVDTSRSTTSTSKRDNLPAFLRILPVHVDITKGAIVVGNENTLAVITAQFEKATGTLDASSSGPLDVYQQLFSFQVTHPIVHMKPNPDYKSSQLDSAALYKQESDKGIPEESIIEKDVTHKHRKPWSKSISILSGLFSKSSDSVHTHSKSGLKNSKYFA…
g774.t1	MGPDSFGVPFSQGPASDTADQYLAHYGQGFRSSLPGIHSALGTSVLSMSEYGKGQQYVYDAEATRSNQVSSYPGIAQPSFTSPYTDASTRLVHGHSNAEMPYIPSSTYESRGPGDLLPPTSFIDARSRHPASQTSTETEITGYVTPTQGTAGSTVSLQIRTNYDLAAEQYTFILMFGKKACVAGLQKVDYDDDWYNYVLSVEVPPFPLTNSWDPTMMLRLQMDKDGQLCHQADAGKFTFTDMSPNLAYQSAPAYSKKRRYSTEFADEQDFDTIAAKRQNTLRFHAKPRSISGAYSAAQLSPLPAQTSLSAGYGPTGAYDMSRSSTYSSQLSQKGLYAVPSMGQGDLKPPHMSPGLQSYSHYSSLVQPTRSPSSLNATPSGLNVLPSPSTLSAPVLVRAT…
g775.t1	MSPSLPYAADVESPLKPDELQVLRAQYEKEGEYVGLQTKFNYAWGLIKSNDRPDQQEGVRLLSEIFRGSRERRRECLYYLALGNYKLGNYAEARRYNELLLELEPANLQAGSLKGLIDEKVAKEGLVGAAIVGGIAVAAGCKPSSFTSPRHSSADMDSSANQSAPMPAGSQRPGHRDMMFCHECADEWYRDERGLTCPECGSDFTEIIEDDNDPRDSNMFGYDGDQDDNSMPDLEQAPPPRLNPHQNPFANDDPDEADISNFNFVRVGPGRFNVQATITRSVSPQGLAAVNAPASIGGFMSMLNGLTRAAVQGQPAGQGQHQGQGEGLFSGAGQSAYQEAQGQDQPGNPTGRFTYHGGARLAPRGDGSGMHVEPVDDISNVMTGLMAALGAQNMPQGGD…
g776.t1	MLLDEDPAALISQCTSHFKIANDTASLLRISDSLSTLSQFRSQHLSSLQGSLSRLSRTHQTLSANHNHTLSQHNPTNHAAEILRLDTEKFKIAKQASDLEIEGERLQQERERLASVAQDLEAEGVEGGEREKPESEDATILKLKLYRTLGIDVEPDATTGQYNKAVIRNAAKGDVHVVNIDPKFSRHFYTNYFWRTM
g777.t1	MAPASFASAAAASNAGSARTDPSGEWARRTNGATQTFRRPSHATTPSGSALLPASRDAPAPQTSTSSGVYVPPHAQPGRNGGSIEGRYSRDQLVQLFKSQRDSDDIKEGFSHLYMGSWEPHATNGASAASWGRKDDHGREAQSGVDQCWDRDGSIQPLHQTELTEDEREVFLSSVNSPLKPPTQNTNKDGNPKEALSLRKTSISQGPGTPYGLSSPTSTRPGNRRRDTGEAYPFPASPATSRFAREESNTVTPPPSLIRRRTDYKEPTAGAIGEEGEKEKASAESAGPLGSLKRTTTAPFSPGGTSPWAASQGGGFSGPMGAFGSFGVPQSEKKSGLGSVRGESRFKGLMGKPSTEELEKAPKEKASVGNLGKLSEAEPSKPSASWMEARSNRPMSSDT…
g778.t1	MMTLDDPLKDLKKDNGGKMTDSKIATLFKPWVEKHNKNLRATEMPNTNTTSGIKLVSAQVDIVRLHSKQLSTKAGKYDRDDAFLGTIHAEKLLIGHTPLKRKRNTLIAKSTSEKLDYLKLPGKAIPDRLEATMKHMPVSEKCCPACWVLVRFLQDEQEHKIMFPGHHTKWSATTLLPTLPRDAGWKAMDYAEMVLPNRLT
g779.t1	MAPKGRSPTYMVVLAAAMLDAATAFPAQVLKTRAPSTPFAPIDPQNWVNPDNMTWDDFVAPPSTSWSDPARKGRDRNFNIAMVTVDYPDSPFVVTLAPNSDIFGNPQPLAAGLAREDVPKFYHDLLNTPNDLNEGHTLHEYWMGDSFGKYGVDLTVFGPYRMPAKSYQYGVDDEEGGFNEDACPEGPPCSVDLRTDALGAWRRDVGNATADAFELAFILSAGQDESSTWQEFGEMKFLTKEDIPEEFGPPANSSLPNYANTRYVEWTSWAAASTIWPNAGGGSSTQGESSGMATFAHELSHLLGIGDNYNNPYSVPPRRAYTGPFSMLDRGSFNGPGGPHTRWQIPPVQGASMGSLHTMRDKHQIGLIDETPILQVSRSGLATSGPVIAEITARSVDPG…
g780.t1	MTSLDMYTVCVQARPDAASSLAQTQSILMMGQVVLADVPQHQDGGGGVDSGALDPFASPDVLKMELLQGQLARQYLRLTLVSGVDDDEEEEEEDDDHDDHDHDHDHGDTHRSSAEPTAMSTLDQIVKGAPASNTSVDAVAASAYAHPPPHTATLHHPLPHHVIDVKSKTPRAPTLSLSDPTSLLPSSPPQIYLNLLILEASLRSQYLTLRARRRQNTFVLTLLALWIAFFFYLLWLRPREDGKGIGGSQYWLLDMLQKVGFITGVVTALLFWATGQWERGVRWPRRWIGVANRGLRGMNAKIVVIRGPWWHELVEWARFIVPFSGGLWGGEQGGSSYHFINVVQEKSHALDTGRPRQRIVEDGKEYAEEDIAPGGDHIKLLLLPKPFTPDFRQNWEMYR…
g781.t1	MVSRLIYTLIEPSRVAIVPVRTEFYTRASRVADGLVSMATLSMTESVLTATATATATATATATDPRASHSTISIPYSSPPSTLPAATASTLLGPPTADTPPLAILTLVAAIVCALILLCALAYFILLRCARGACPNCRRCASEVDKWRRGELVRITPDMVQRRMHAWDLEKGGLEGQGVRMVGDSWSKEDQEVEDEGGMRKEGEDCHGDAKLQQPRLAHLRAVRRRDSGCHFAARRHGDDSEKTRVVVGDDSARPDELEETTVARGGKELEGQKEQILRSGVYQMPPPRQGNQSRFIERFSLATNCDL
g782.t1	MALAKEYPGSCHCGFVRYKIRLQFPPVLDPQAKSIRLYKCNCSTCQRMGFFHCRPISPADDFTLISPANIEELGDYRVNTKTNGWYFCKQCGVRVFGVGGVWEQVSPDGEGEAGVDCEELPPVFKTKPTTKTRTVDGQEVTEPYHYVSVNAVTLEPSEEIDLRKWHENGWVFYVDTRNHTGGPRPAKPYEGGMY
g783.t1	MGIGSGIAVSLSFISCIWLPATLLCCLPWVQRQMLYLHWVTMFPGKWLEEPERAGFSKNQVTPFRIATKDGHRLFTWLVAPLGVYARHLHDFVHEQSGVEDVTEKLAFRLLRDDPEARLLIYFHGNAATLGQQRRTEEYRSYSSGACEKVFVLAFDYRGFGKSGGVPSETGLRKDAEAVVDWALHVARIPPSRIVLLGHSLGTAVSTAVAVQYADMGVEFAGIILCAAFTNAGNAFASYSIAGVVPVLAPVKMIPAVQAWFSRRMRDTWRTDVRLAALARKYSKLRLVLVHAEDDGTMPWNQTEELFKSTLKAATGANVDGDAWSAPKHDTVDLGEAGRQEIWEKGNARIEKLVAKHGDHNQMMTWSPIALAILQTFGLTASTTRL
g784.t1	MPAIAHLAPRLLAGATSGGISGTAIAVLICVGIVPVIALIWVCIWLLFFYGKGRNCCCVRRKRAATEPGVVESTVSSPEALNEKTNYTLPQRPTTTYRAESGSSTERARDSRGTLKKQQPRESLQSQWSSHSTIPVVQEPKPFV
g785.t1	MLRLYLRSRPAVRGALHTTAGFGGASYISLSLSTPIKIGDGDKSSSSSSTTTTSSTTTTTNTTTTTTTTTMAAHEDSADGELRAKTQQSPLASQRQAAKWFPLSASDGFSQWWAGLSPMATEHRVLSFIPHLQSPPTHTQTGAAPASTDPSAAPPPLAEDHTTTDARTDPYGPRRWNSQMVELSGKGRALNEFSVERLGEHVDENLVMLHGYGAGLGFFYRNFEALSRAEGWKVYALDLLGMGRSSRSPFKIHATDKHAKIAEAESFFVDALEEWRIKRGLDRFTLLGHSLGGYLAVAYALKYPGHLNKLILASPVGIPEDPYAAREDTPDPSHSTMVNEFTQDASATRNGVQPSTADNNNLLNQAKKKQEMPNQPPRRRMPGWLTYLWEANVLSPFSF…
g786.t1	MVYTASFAFFEALWEAGVRNVFVNLGSDHPSIIEAIVKGQNEKKGQFPKVVTCPNEMVALSMADGYARFSGQPQCVIVHVDVGTQGLGAAVHNASCGRAPVLIFAGLSPYTIEGEMRGSRTEYIHWIQDVPDQKQIVAQYCRYTGEIKTGKNVKQMVNRALSFAMSDPKGPVYLYGAREPMEEDLTPYQLQLDYWRPVEPSALPPSGVKKIAEALVNAQEPLVIAGYTGRNHAAVQELVNLADNIKGLRVLDTGGSDMCFPANHPAWLGTRYGNDPSIETADVILVMDCDVPWINTQCHPNATAKIFHVDVDPLKQQMPVFYLNAIHRYRADSYTSLSQLNSHLEATFKDKLSSELFASRWSGLQASHKAKLETIASEAKADSRNHFGTSYLCAQLKAL…
g787.t1	MFLCRSSILSSFLVGALAQTTCKLPIPSVPYTSGVPSWQATEYTCQGPPDIYVVEPSNGKGLGVFALHDLDVGDIVMRETPILKIDPPNYAKGTGYPMALVSELVRREFERLSPDEQAEVMSLTYHATAVEEATRDKLGIIFRTNAYNTDDQIGLFPKIARINHSCRPNTSYYWSKKLNKRVVYASRKIKKGEEFFVSYIGLLSTHEERQKRLDRYGFKCTCEACAAEKALKQVSDQRRVEISKAFMDFEPQLTLDVPKSKSARRQARMNAQASSQLAGLVEEEGLADYYAKAYRVAAISHARIEEWQPAAIFANKGYKLKHMEDPESPYTAEMYSLTSSFIQSWESELKNQSSEKVSK
g788.t1	MTDEALISKDAPSRKLPMRVLVLGLPRTNTSSLISALRTLGYHPYTMRSLVTDPTHIAVWQEAVHSTQHASGLPLPINDILSDYDAIADLPGCMFAEQLITAYPRARVVLTTRAYREWEKSMRESIWVLFTWRLFELCRLTGLSRMAPLIRLLHALFGVHNGNVYGGYETRRAYERHNERVRELVSREQLLEIDAEDESGWDELCGFLGEERPEVEYPRFKEETAMRAGLEQTWFSMARYLVLMVVLPGAVFIMGTALYTYADDLVAARDQWILAPLKGYLNS
g789.t1	MAVEDTSSDVSFPWHLGVYDAHCHPTDIMSNVPKIQNMKARCLTVMATRAEDQDLVVSTASKHGVRSANQADWSKEECIVPCFGWHPWFAHQMYITDDVNEEGNETNLTEDAKIAHYQKVLQPSRQDPSEEDIRIFSALPDPTPFSVFLSQTRRHLEAHPYALVGEVGLDRSFRIPEAWAPDLWATRNSSLTAGGREGRRLTPFRCQPAHQKEILKRQLRLAAELKRAVSVHGVQAHGLVYQALHELWKGHEREVLSRREKKKRGNDDPSVEMENSKAAREESSAPKPYPPRICLHSYSGSASNFKQYLNPAIPIRIFASFSTAINLGDALDEETPAEFAEMIKTVPDEMMLVESDLHTAGEEMDRRLEDIVRRICKIKGWGLEEGVERLGRNWRAFVF…
g790.t1	MAGGRRNLRSTTSDVEELPPRDDLGQEPDAQRRDDAPRVSPAPMEPPLNPHIRGGSATTAAGIATPDVPTPRVTQMELLQASIPLLLEALNEAELSGAPEREIEIRQRQFNRAVETLQRTHVGPTPGSHRPAFDEAGKIMRVLNNVQPKPKLGTDNKPPSTQQVDQWIKDIDTAFQYAQVVEDSVTRTYWIMGTIHYKEEQLVQDPVFTQYKNYDKYFNYKWKADNSVNTFLMKLNKRESLLPRNFAKFDDGTDDHKFKIAFGWLSSATGPLERPRRWQPTVQWKQPGKWEALVANLSHLRLGPETKGKQTRIAVTVQLIDSEGNPKTLRALYDSGSELNLIAAQVAIDLGLNPAGTDQRPNAVVLDDTKLSLIEQYQLTMVCHDSKGTPKTVGPTKFW…
g791.t1	MLDIIADETWVRRSLISSAPKTSPVCALDFSSVLLPILPDEIVTEIAAVIDEPEDLGHFRRVNKRFNAATKYVLGKRIANDFTVYPRHASMKALLTAVRDDGVAKYIRNITLLAEGLKQHEYGYIWAWEDLQIWAELTITENDIKTIHEINAAHANDVIENCDFIITGHYRSMLTTLLRLLPNLATITIRKLQPGEQIPGWSGTKLFKDLSFHHDRLDTRKILYGDWQYDVTHRRITHYRDEFGDLICEPDAGPQASFVDDLKAAMSTSGTKARPVWHPVV
g792.t1	MSTSGSYHIPFPQNFLSLNTPIKRSSDVSSSTLGNGDLSSTAVAQLPEQPAHGFLSNRSDSMPRHHSVSSVGSSTATESVGGSPPSLPAKDARSPSVSEALFTPLALNTKHTPLPPSSYREVGERGVKSWFLTNRH
g793.t1	MATTAPSVALTPLVCIIDFHHARGPEVEAWIGLEDGEDPAVEHDWPLLPFMALSDGAHASTEDYSYFTLRRSATPSYPATSLFGISCTRQLPASELIDRPADVTRSTVQKAVVVVTDSPQHFGAIKAQLGVVTAAWFAQRDFTDIDILQRFHESLPRLLENQEGQAEHYFGISLREFIHEFKWQTLVLFKCALLQPKVLFFGSHCERLCMMQFALISLIPGLMRHLQDSADPKFNSSEGKIVMPTSLKTSERSSLLAYMGLPLQLFGTGSLFGPYTPLQQLDMLADANTKSYIVGSTNSLLLQQKDRYSDILINLDDHTVNITSTSLRQASILSTPDRRWIDFLTQTVNDSWDESDPARPKDHGYTGSEEFIRMQFEEYLLAMLSSVKYKLYVEKHPSH…
g794.t1	MAEFVRAQIFGTTFEITSRYTDLQPVGMGAFGLVCSAKDQLTSQAVAIKKIMKPFSTPVLSKRTYRELKLLKHLRHENIISLSDIFISPLEDIYFVTELLGTDLHRLLTSRPLEKQFIQYFLYQILRGLKYVHSAGVVHRDLKPSNILVNENCDLKICDFGLARIQDPQMTGYVSTRYYRAPEIMLTWQKYDVEVDIWSAGCIFAEMLEGKPLFPGKDHVNQFSIITELLGTPPDDVIQTICSENTLRFVQSLPKRERQPLANKFRNAEAEAIDLLENMLVFDPRKRVRAEEALAHPYLAPYHDPTDEPKAEEKFDWSFNDADLPVDTWKIMMYSEILDYHNVDATAQEEQNVS
g795.t1	MGICMSSSPEDGEQKKRSQAIDRKLEEDSRRLRRECKILLLGSGESGKSTIVKQMKIIHQNGYTQEELAMYRLTIYKNVIDCAKALIGAMRQFEIEPEIPGNDEYCNYLVEYTVDPDPEKPLDVRVGQAITSLWRDGCIGKVLEHSSEFYLMDSAPYFFDEVERISDPNYIPIESDVLRARTKTTGIYETRFTMGQLSIHMFDVGGQRSERKKWIHCFENVTSIIFCVALSEYDQVLLEESSQNRMMESLVLFDSVVNSRWFMRTSIILFLNKVDLFKAKLARSPLGNYFPDYSGGNDVNRAAKYLLWRFNQVNRAHLNLYPHLTQATDTSNIRLVFAAVKETILQNALKDSGIL
g796.t1	MDDDGDAAYSPFSSSHVWSHTASAEHVGPYESSLFAPLELDITSIKFDHPYAPKHDLDRELRLPDLDTFDFGPLPELDGLDASSVSIETPVLEPDEDVWEVALELGPANKHVLFYTWESLENGQQIESYTPYITERGPEVYDAALAHDDGKTPAGSVVKGHVLLQSLWNLGLGRSSILFHFNPKLKSFESTIAHGRASGTSLPAAQSFLGRFVHIGNTFLYLRAFVERTFASTNSIPAQVALATSISSILGTLESHLGNHSGSVASLLQLQRLFTRPREILTHVARMTDSVKHAKTNEQLASILHHRILEVEESNGYLRHISGKILSHVAAPSLRLVGEWIGIRQEQGPLPIHERGSFVAVEEDAPEHGPLEYTYRSEMMPRFITPEDGNLIFDTGNSL…
g797.t1	MPPRKKAKVSAASTPLGDGQPGTPQASAALAPAQDELLNDPWEDEQEIQLLKSMMKWKPTGLHKHFRMISIHNDMTSHGFATEKAPHTRIPGIWKKLDQLYDLETLDARENEFTFSEDPDSASREEPETIPDFELPEEEFGAMMWQSRFRDAESSEASSPPMMPVEDEKALYMPGLGLLKDLPDGVHSHKAESVADATPPPKKSTRASRSTVKSGKGAKAGAAAAKTTKAQSTVSDSEEEENEEDDDDESSSESEEEDSAPTTRRTNRTKAKPAPKRTRKR
g798.t1	MDLLPQELLDGIIEQLAVYDFPTSARFPILDGVSRQAILNARLVRRCFRYSNILTNLFIAVMEETPFLWHGSQMPRLLELARSGYAGRMSTLSLSSMNPRPSQHNLLVGAASQSVRSGRPFTALVPKDLITALRQFVRVKHLRYYPISPKCFQEARLSGTSRTDADPRVRYGYSQDNDNLNSWLRGQHEPTRIYDDAMSDSAKAGLALESVTFPLFGNRASYCGVQITAVQFPRALKRLSISLTDRFHDVAIFEPWLGGLKHLTFLEVAISRSPESLGPWNSFANCRRLTNIDTPAASDQLFRLEELRLMSDNQSCFSEHDLLSGLDMFPNLRKLGLAHILIKSQTNNAVSWSSFVRRISPRGLQRLWLLDPRDLWTDGYMGRAGHYLMRKYWGDDRVK…
g799.t1	MKFSALTLLALGASATAYVVNDKKVVTNNAVEARVVGSGPVRASALVAALQARDPEPHHKGKGRKGKNNKREVEVEARQEEFDQAADDAHWADLHTREPHHKGKGRKGKNNKREPEPVVEIEVRHHKGKGRKGNNKREVEIEARHHKGKGRKGKNNKREDENEPDENEADEDEADEVTKREPHHKGKGRKGKNNKREVEVEARQEFDQAADDAHWADLHTREPHHKGKGRKGKNNKREVEVEARQEFDQAADDAHWADLHTRDAEIEAREPHHKGKGRKGKNNKREVEVEARQEFDQAADDAHWADLHTREPHHKGKGRKGGKGAN
g800.t1	MEKQTLATPSNDDYENAAFLNSSYLKESDTTRRRNYVYLTLFNLFIFTLSMLSLICAVMSQKDSSGHAAAKLMDQFDIFSPAMHEVEYSHVKYSLPKPLNSSKYVGTTEEVEKAWMDIAYLPDQMVSKSDFPKLNKPDDAMQVTDPTTGETGYRVGVEAFHQLHCLNLLRMSTYPDHYKSISWSDTNDVPEKVREHLDHCIEILRINLMCLSDVNVFTFHPTSEPDKQGMGGYWPDYESEHVCRNFDHIKDWARANAVPDADV
g801.t1	MSNLHESVVRSRAPSHRPSPITAPEYAVAGRFCVPCLEVLSELGASGNRPWVHRLSSQDGCKLCKLFLRSKKTNRNDTSKTAPELFVVVWSSFGGTGIEFRVQRGRTHVGRGTPTGWLISNRVHANIDHHLHSRVLQKDKVEWDIVKDWIRHCRGDHACSCGLKQPLAIAGFQVIDCFSRRVVQLPDNLQFAALSYCWGRSKESLTFAHQLPERTSCVVEDAITATRRLGLHYLWVDRHCIDQSDSATKHALIQNMDQIYHNAAITIIDATGADPRYGLSGVSSAERRSQEIISFKGQKLISIPNMQHVVSSSKWGMRGWTYQEGLLSRRRLVFTDTQVYFQCLEQHFCESLSVPLEDISRTYQREVKPLMQHTQAFPSQGAGTLHHHLYERIQEYLLR…
g802.t1	MWGLDRLSQYSTPTGTPPPRRDSYSPAPRRVYPGPGPLPIRPGLQPRTSSLSLVSPGASNVSLPSTARGPNGAPLRRRPTGGVPPNVPDPVQVLASIMGGPSRRPANGDGNSNPIQHRPDEVDADIDFGELSLRDFAEPGLYEQRQNKNMSVHTYSAQSVEEYDKEKDKFEDLHKSIIACDEVLKSVETYLTNFQADLEAVSAEIESLQNRSIALNTKLENRKTVEKLLGPAVEDISISPAVVRKIAEGPVDEGFVRALGEIEKRSKIINARAKEQPDLGALSDIKPLLDNLTNRAVERIRDYIVAQIKAIRSPSINAQIIQQQAFLKYKDLYAFLARHQPELAQQIGQAYIFTMRWYYLNHFTRYRTALEKLKIHALDRYDVLGEDPNTKRGGTLLGQ…
g803.t1	MADDAQHEHTFDSADAGASQTYPMQCSALRKNGFVVIKNRPCKIVEMTTSKTGKHGHAKVHLVAIDIFTSKKLEELCPSTHNMNVPNVRRQEYLLVDVSEDGFLSLMSDDGSTKDDVKLPDGEVGDKIHKLFTEDGKDTSVIVLTAMGEESAIDAKEAPK
g804.t1	MESRLEKGPICGVENCRSRWYEEGEDGYRYCQNGHQQFGLIRAADDDDFTLATTTRTRKKKDVNDQVKVVKHFSGRHALDLYLKCLQLILRHQVWYLIKDQGLPAELEFIVFDLWALRIAQFGERIASDNRIHSQPQSQVFSTLETDESETDGATTTLRTPKGRERKLDGIPNLLDCLALCYLGILTLRLPITPGDIYHWVTEGKLAYRGAIKCLPLTMRDRLSPSYHATLNPNALLRYKRFYAALTDLQISITKDHKIAWAPLNHRLLLFRYLKELGLPLEVYDVTVRLGKLLGYDFVFQQEGKKKLGIRHLPEAQLVGCLIVCVKLLYPFHDEQRHPRSATEPTAAVINWRHWHEQLEIKKREQKGANQRFTVEDLTNFEENDIFDLTSDNLDQYLD…
g805.t1	MQIFVKTLTGKTITLEVESSDTIDNVKSKIQDKEGIPPDQQRLIFAGKQLEDGRTLSDYNIQKESTLHLVLRLRGGIIEPSLKALASKYNCDKMICRKCYARLPPRAVNCRKKKCGHTNQLRPKKKLK
g806.t1	MQTDLAQPIRIPTPHGLDVPESQESVISTISSTFSAPALPSTSSNLSSDYDGASPSEPNEQASHGKTAQAPSPTSSSCIHGQAARTSVPQIATAAANTPQTGYTTATSMSLISPTTQGFKRSADGSVKGHGSTTSPKEGMFAHKRNKSMDTHSSTRIGELSAQLKTRLSYAMVKVQNGWEKQSLDELEEVHSQRGSPNSAPGGSRVTFDSPSNMDYRRRPSAISDNSDQMIMSPTSDSARSHALNSAYWRSTNKPAMNAAANLISITGGNVGLGLAPAPELESGRRRRSSTIHLPPSYLGSAQKKHNSDLGAGPRAPTTPRASILRMPSQQAEKDAVDTLLFMSSPKNSQHFPHTSLPAHSSLHEGAPQRRVMFEAYPPQDRRMVYQPPMSTSSHYSAS…
g807.t1	MGRWQPYLYSAPARESMMDVPNTFNPKAVTMASRMPPSPSKKKQDGPLVNFNKHPDNYLVLPYGKTDAKPMSPKTKLWIKIARWTQLFFRVCSLLGAVGLLLCGIFIRGAQDTEGWIIRIPPGVDIVACLYAIYHLIRSPISRPAASSASYHFFALVTDAGFIPFYVYTLLLSRRNADIEAGTNGRWRTLFPTDDETNKILLTTWLTATTAAGIHLISAVIDMYLVVVFRKITKLPPDMNPLEDNLTRRKSKHKYKDSSLSAATPFLDNEKRFSGQSLTSIDGTSQSDPLLSQDVPSPTKTQMSFMHTRNNSETTYSPHTPQSAQQSKERFSMYSQPQTARQSRTSLAHRDGLYRRDDDVDNETLAQRKSFLAQQANMQRRDRNNSHVTASSKQDFYTP…
g808.t1	MYEQLPVPYGLVRFGVAPDHPEVKNCQDTFEEVAQSSRFNYIGNVRIGHDIELTKLKPHYDAMLFSYGADEDRRLGIPGEDLEGVFSARAFVGWYNGLPQFQNLKPDLQSGDHAVVVGQGNVALDVARILLAPLDHLRKTDITEQAIQTLSESRIKHVRVVGRRGPLQVAFTVKEARELMKIPSIAFHDIDRSFYPPEIKKLPRVQKRTAEVLLKGSIATSGEVDRSWTLDFLLAPTSMNAEQGSNHLSSMTFRMQEFVPDADPLDPSARVQPTRDDVTVPASLAFRSVGYKSTALPGLSELGVPFDSRLGIIPNDVHGRVVSPDSGPGNLTAGHIAGLYCAGWVKRGPTGVIASTMQDAFTSADVIAHDWEDDVPFLNNASGEEKTTRLGWDGVREEV…
g809.t1	MKITVFSLTLMLGTVVSAAPTLQSIPGLVNRDTPEETIDCGYCTGMLDFCFKNGHTQGQEGCKQTCREHVCHRTPECKNCHGEFDQCPEKSRY
g810.t1	MFADIVETDGILDSQIDTDTQCFLVHVLSDIDPEDTFFSQYQQLPPRAADMSLDDGLSFASTWLQKSLGMIKIGYESGEARLQMPFAVLETNYHTACVRASALKRKPPHEKAVIITLDFLALKNVKLVASAEHAFDFLRVSKESLATGDRLLLWAENDNDGRPAEALLEAVLTIVEWDERDDEEEVEDTGEAASYAIKTETYPEEGTGKTVPTGLAGPSGKKDSVITKRALFEGRSKTDSLYADNLSTLG
g811.t1	MLQTLSLSALLLLTRVLASPFSRPSSDPLPLLIWHGLGDNYAADGLAEVASLAEVANPGTYVYIIRLDEDASSDRTATFLGNVTEQIATVCADIKADPILSSAPGVNALGFSQGGQFLRGLAERCGGDNGVKIKNLVTFGSQHNGIAKYQICKPTDWLCKGYIGLLKANTWGAWVQGHLVPAQYFKAIDEQTGEPTEEYLTNSNFIADINNERALKNVTYAQNLAQLDNFVMYVFGNDTTVIPKETAWFAQTNLTSGEVVELRDRDIYKEDWIGLKKLDKKGGLHFKTTEGEHMTLGDKLLKQVFREWFAPPKESWREVVQEMIEL
g812.t1	MARSKQVTKKVEKKAEAPLTTKKQNETPYQLDPAQVERAANALVAHMKKHKEEKEATGTKDLMADEDEAEETDQPIFLSVSTKKHVNNTNNLKPTKIALPHPIIASDAKICIFTKDPQRAYKDLVASDAFPATLRERVGRVLGVEKLKKKFKSFEQKRALLADYDIFMVDERVIKIVAEFLGKVFYGSKSKRPIPLRLTAGAFVDKTAKKDNEAQGVVGTAQGVAKEIETALNSTYLSMSASANTSIKIGNLSQNAAQIKENTEAVIAAIIPKHIEQGWRNVRSLHIKGPATKALPIWLADELWVDDSQVLDEPFQKKSIGEGKTAQTKRKWEEWEDELLDEDELAEKRAKKEAKKAKKTGPAKKSSLSKEKKKALKQDALSSVQTPLIA
g813.t1	MDFSPSKLMQQLPSESTPKSLSTHSQKPSLLPAFGEDNFSSSPFPRPGSSKRKFQDDSPSFARQQLKYYPTPVPTSSTGILDFSSPRHMRPVLQRAVSALSERIPLGAVPTVDLPANGELLRMGRSSNSADYQLSTNRLISRVHIQAAYHAPTATYSRGHIDVECLGWNGAKIHCGGRVFELAKGDTYVSENPETEIMLDVQDTRVVIAWPVIPVSKFSWESEEEDMPTPTRRNTQGAFDSSPPVIPRSPVSQSPMRQPVFEALGPNAPAGGVQVFEDADAQAEGSTLLDPELTFVRPTVSPIGSSQEAIVRDSKTSFTSSFGEGDYSDNDEENDPVVHSFGPFGQNLLSGLESFSTATPGLGNTPRPPRMPLASPSARRSSIDSVRFKDSPIKNHVIN…
g814.t1	MSVSAALKARVRRPSYLKKIAKAEDLIHHFPNDAYIGWSGFTGVGYPKKIPIALAEHVEKNNLQGKLKYNLFVGASSGAETENRWARNNMINRRSPHQVGKDIAKGINNGNIKFWDKHLSMFPVDLMYGFYTLDKPQNRLDVTIVEASAITEDGGIIPGASVGATPELVQMADKIIIEVNTASPNYEGLHDITMTDLPPNRKPYLVMSPEDRIGTPHVPVDPERVIAIVESDYADQTQPNAPADATSKAIAGNLIEFLEHEVSKGRLPANLLPLQSGIGNIANAVIEGLATGGANFKNLKVWTEVLQDSFLDLFDSGNLDFATATSIRFSPEGFERFYKGWEEYAPKLLLRSQQVSNSPEIIRRLGVIGMNTPVEVDIYAHANSTCVMGSRILNGLGGS…
g815.t1	MDPREVAIQSAIADLNSGVFTSQRQAAKAYSVPRSTIQERLSGRQPNAIAHHQQQRLTPEQEQFLVNWILEEDSRAQPPSHPRVREMATLILHMNGDYEPLGHKWVTHFITRNPRVASIVGRKIESARTTAANYETIRAFLELFERTRIELGIQYEDIWNMDETGVGLGVCSNSRVVASSSKKKAYVKSPEDREWVSIIESISAVGKKLQCLVIFKGKHLQSTWFLAQGVPDWLYTTSENGWTLNAIGSEWLKRIFLPQTTPQPGRWRLLILDGHGSHIPIDFMWLCKQSKVYLLYLPPHASHVLQPLDLAPFSVLKSRYRSGIRALSALDDAAPIKKERFVTSYNKARDKGLSERVIRAGWKAAGLCPYNPDLVLLSSQVSGRPITPPPSTQASDDVF…
g816.t1	MRFSTIAMIAGAGLASAQVESFLSSVASSIGGQVSTALPGGGASSLLSSVQSSLGSQVSSIAGGASSALSSIESSASSVAASISASVSSEAATATGSAASSLSSAAASARSSASAAASSARASASSAAPSSGAAAPTAAPVAMGALAGGLALAAGLL
g817.t1	MLAARSFAAPARQCLRQARTPAFAQSAFRSYASAPSEVAKFQGTKGNDGKYTVSFIEGDGIGPEIAQSVKDIYSAANVPIKWETVDVTPRLNADGKTVIPDEAIESITKNYVALKGPLATPIGKGHVSLNLTLRRTFNLFANVRPCRSIEGFKTPYDNVDTVLIRENTEGEYSGIEHVVVDGVVQSIKLITREASERVLRYAFQHARDIGRKKVRAVHKATIMKMSDGLFLSTARELSKEYPDIEFDAELLDNTCLKMVTDPLPYNDKVLVMPNLYGDILSDMCAGLIGGLGLTPSGNIGDECSIFEAVHGSAPDIAGKQLANPTALLLSSIMMLRHMGLNAEAANIEQAIFKTIAAGKYITGDLGGKAKTYEYADAVIKALN
g818.t1	MSPCSTSRITSRAYATLKARTAPILRTQRDPPRSSPASAPAPPPPPGWTPSPSLRRTARILAWSTNVLAGLCAITFIRDNILRIDVIRGASMAPTLSPTVHETGVEDWVVIAPVREQPPKVQYKEGRAYVEDSEQKEGEGVRRGDVVTFWKPHRPEEISIKRVVALPGDIVYPKRGYALDPETVRRPRSHNLDGLPEADEDAIGGELQDLDLGKVVVPYGHVWVEGDNWRNSFDSRDFGPIAKGLIEGRAVKIWRGWADWRDVGDEREKKGRSQVVRGKGEVPKVFLE
g819.t1	MFADITSKAINMPSHVHEIGTVHRIACIPGDGIGVEITEAATQVLTKLSDVLGGFQFDFHSFDWSSKKYLERGWYMPPDGIEQLKKFDAIYFGAVGWPDVPDHISLWNLILPIRKELNQYVNRRPNRILEGTKSPLEGCKIGDLDWMFIRENSEGEYSGQGGVSNESAPHAMATEITVYTRVGTERIMRFAFETARSRPKKHLILCTKSNAMRHGMVFWDKIFYEVAKDYPDVKTEKMLVDAITVRMVLHPKSMDTIVATNLHADILTDLAAALSGSIGIAPSSNLDPTRANPSMFEPIHGSAPDIAGKGIANPVGAFWSAAEMVRWVGEEKAADALMKAVENVTARGVKTKDLGGSENTKGVTEAVCKEIETLFGSS
g820.t1	MATFFDTVKKSWEDVPVDASKDNAISTTEFLEAAESLTTLFDVLGSAAFKPVKNDMSGNVKKIRDRQLAAPTLSETLQELVLNELKEKKHTATEGLVWLNRGLDFTAQALRHNLSNPNKELADSFRDAYGNTLKPHHSFVVKPLFSAAMSATPYRKDFYAKLGSDEAKVQEQLEKYLSALEKIVATLNQFLARKEAKW
g821.t1	MALKSFDPETFLDNWSDENFNPIYSGKPLARCIGEAFDIPPSDTYIYRAQGETTLHITEQAIAGKRKHGMHNWYHDDSGTPIEPQHPSLEEVTAYTSLFDPSLNLPKALNGFKSNSKANTIRKQVADHLSSRFHNTSAGLLPSKKDRKHVNPYLSLWTYSCQELEWAGPIPSTSFTKISHHILPIYYHHFGCIVPSYAALHVLAKLAQPSKPSKEPVLPILDVGSGNGYWTYMLRHFPLPAPEWKALDVRPIDSGLSEYRVTWVEDTIKMDGKEYLRRNDNGRGMILLLVYPQATGNFTGPILKMFEGDTIVVAGTQNENGFTAFQDQGVDQWVEKNLKPFVLTLRMPLPSFAGKDEALFVFQRRNV
g822.t1	MSDTTLPEQHISTTASIITKAFTALIALLAIILAFSSSFRNAISSALTKPNVRAMSTTAAPASMKITKRPWSHRGHADHDWLYTYHTFSFASYYDPRHESWGPLRVINEDRVKPGTGFGAHSHAEFLIFSYIVNGTLEHKDSMGNLENLKRGEVQFTSAGTGIRHSEYNRNKDDEVHFLQIWAKPNKGGLKPHYETKKFSDEQKTDKLCRIMESTDRLGDEKHAIGLQADLSMDASILSPGKKVTHEVVAEGPRKLFAQVIMGKRAQPKSGGAQIKIGETVIGEGDGAYIDGVKGPLSIEIESVGDKPAEFLLFDMGPEQQ
g823.t1	MNAVIILVILTTLAQAGLIPTLPPILGRDEFQNSALHVSAGRNAMLVSDKPTQDYNTVQYRAYIAFLVLGIVLAVLFLPVVLSRSIVGWYCKEQEKKKVQQRNVDMETATAQMRAMTQPEVVHLRPERAG
g824.t1	MAANMDPINSALDITEISHETKREMSTFDVDEDDAIRKVEEAITVDPNAQQGIRNVEAVTLTWTKTSLACAFACMWMLYLTNAFQSSITSNLTPYVTSEFEEHSLLTVINIVANSMAAAVYIPTAKLLDLWGRAEGFCIMVCFATLGLILMAVCKSLYTFCAAQVFYTIGFGGMIYCVDVITADASSLKHRGLAFAFTSSPYIITAFAGPKSAEGFYNNVKNWRWGFGAFAIIVPFVAAPLFIILKLNLRKAKREGVLAREKSGRNLFQSIVFYIREFDAPGSFLLACGLIIFLLPFTLADSAPNGWSTGYIIAMLIVGFVLLVLFGLHERFTAQVPFLPFSLLLNRSVVGACLLSFTYQISYYAWNSYFTSFLQVVSNLTIAEAGYVSSTFDVLSGFL…
g825.t1	MRGYGKWCSSVYAVKGTSKYAGTVATAQDMLHYIKLRAKSKGEPPEEAKLWYYGISYGTVLGSTFASLYPDRIERMIIDGVMNLEDHFNGGWEKSIVDNDEASRYFFKRCFEASPRLCQSHQNATNSSCQHAT
g826.t1	MTQASDIIPTPEAPFDEEKSDLSRELKYLEVRIAKHEEKLEKLMQDIYAEKRPLKKQELEKQMQAEKEVVEVASPSSELPSPFTATEQEANNARRQIRTRPFQTREKFSKLEARLEEEEEEKEEEEEEAKLTALVKNHERKTLRRIAH
g827.t1	MAELDYATRRQHMVGKLERILAQIEKHGRALYSLDEKTNNVKKIPANTQAEIESRKKKYFAAKERYEDALSDWQKEAVERHEKARRKICDTVEKQLNEAGVELKSISFEDVEVEEE
g828.t1	MRLFLLPISTRRSLVYCEKLHEKAPKDRSILDKVTLKANETWAAWEKDEKAVGNWKKKVTFYGNHALKRIPYEEWGLKTLPTLTDRRKQDIIEGKAKHEILFPGRYLKQERVTEILTKLAQERQGMHRSKLIWSVVLMPFTAPFMLVPVIPNLPFFYVLYRAWSHWKGDLSTVPCLFHELTFAALTGSKYLEFLLKHNQPKPNPSWALDEAYTAGLMYPTRKISRAAPRPTEDEADKVSGVVHQQTNNESEDVMVLQRWNGKLIAEQFDLPDMEVEIERAVEQVESSIEKKEKLMEQKIEQEKATTGTPDQRAKDALPDHILDKIHDEAELIAERAKEPHVKEAAKH
g829.t1	MASKPMAERRQSDHAANGANGPSGPSGPREGLLSPSDALTTTAAAVTSASTPAATPASATASASASASTSISTASRQSSSSTHLGSSVGPRLLPSPIPPPTASSQSSQHRPYSRVSVVSGLSRDDQSERRAARQSHSHSISSAPHTLASSKGTSSTAADNRERQRAARSLPPWVQSADEDEIADVTSLLLPRTPTSVRPASHNYMPTPKSNVPGRKFDHAREGAPVTLNTPVSENASKWKQFAAASNYEQHDRPISSRGQIVDDDWMAANLPDLEKPWEPIDEEDKEEKLKGFWMFTPAKRRRKMVRLHRTIMNHPMVPALVRMIVLTFSILALSLAGAIFHKSDSASCDNNSSTWMAIIVDVVAIIYTVYITYDEYTSRPLGLRSHNAKMALIFLDLA…
g830.t1	MPAKLNLTPLSSLRISSHYIPSHAHIPNTTPHNHPLLIYHSCFPPSTSPSAIESHLPSNSITPQWRYTMYTTSHYHSTTHEILCIINGRAKLLFGGEQNPGKVETEVEVGDVVIVPAGVAHRLLEDVEGGFQMVGSYPKGCSWDMCYGKTGEEAKAEAVGRVSWLEKDPMYGDDGPALWGKEKLEQSVKS
g831.t1	MASTMPPVPAKDDVNATWKYLEAGVDKIMTNLRGGMDMKTYMGLYTAIHNFCTAQKAVAGSSFTTNNNRGGAHLLGEDLYQHLIEYLKAHLAGVQAQSKEHVDEALLTFYIKEWNRYTTAGQYNNHLFRYLNRHWVKREMDEGKKHIYDIYTLHLVRWKEDMFFGTQESVMRSVLKLVEKQRNGETIEQSHIKSVVDSFVSLGLDEADSSKSTLDVYKQYFEKPFLDATAKYYDNESKQFLAENSVVEYMKKAEARLDEEKDRVPLYLLNEIMSPLMRTCEQSLITNHSQALREEFQILLDHDKQEDLGRMYKLLARIPEGLDPLRSRFETHVRKAGLQAVEKLAQEGESLEPKIYVEALLEIHTQYQDLVNKAFNGESEFVRSLDNACREFVNRNKIC…
g832.t1	MVCRPGISSMSLGRCYAGHSFEHKMSTAAKHGLQGIELFYEDLCDLAPSKSSSDLLTAAAYVRDLCLSLGLEIICLQPFMHYEGLLDRQRHEERIEEMRLWMKLAHALGTDIVQVPSSFLPKSEISSDLDLIVSDLQKIADMGLQQTPVIRFAYESLCWGTYCDKWERCWEIVQLVDRPNFGICLDSFNILGRLYADPTSDTGCNVNAEQVVAQSIQRLVKQIKPHREKIFFIQIVDAERLDAPLKPGHPFYNAKQPSRMSWSRNCRLFYGETEYGAYLPVKHVANAIINEIGYDGWVSFELFNRAMERKDHGVVEELASRCAIGWEKMVIDLGLETAPSPFVKTTGKEDTRKDSTRTSFENARL
g833.t1	MSEISREELDTIYAFAVDLGKRAGQMLKDAAQLRMDGGGGTKAQDEHIQKANAVDLVTETDENVETFIKDEITQNYPSHKFVGEESYSKGASRDYLIDESPTWCVDPLDGTINYIHLFPMFCVSIAFIHKNKPLVGVIYAPFINQFFSSCAGRGAFLNETQQLPLIRNPIASMPENAPAGCVFSCEWGKDRKDIPGGNMHRKIESFVNMAAELGGRSGRGGMVHGVRSLGSATLDLAYVAMGSFDIWWEGGCWEWDVAAGIAILLEAGGLMTTANPPPDEATCPIPDVKLGSRLYLAIRPAGPSVTETGRQSQERTVREVWRRVRNLDYSRPGA
g834.t1	MSKSILLINGPNLNLLGTREPATYGSTTLPQVVEAAQKQCTEKLIKFAHLQSNHEGVILDRIHEARENVDAIIINPGAFTHTSVAIRDALLGVDIPFIEVHISNVHAREAFRHHSYLSDKAVAVICGLGTYGYEAAIEYASRHIEPREKA
g835.t1	MSTSAPINDDSLARKLGAEYDCVIFGGGLSGLVVTNRLTENRKSISCTIPGPLLSVLVVENGVIDDQPASRVPSIEGFPKPLGTFWTPNTIDNSTKKRCYARFAYCDPIQKRSTLHLLTSTHVNEILFESCGKLAASGAKITNNGNALTTCVYAAKEVILAAGGIFTPHLLLLSGIGPKDVLSAANISIKRELPAALGRGNAAAFLAFKQFSSKYHNVTGQISKQDATACHPERYSKNEALSKGFFAQRKILIEHYLSDNAATGEYSIQPWGRATTAVQKPLSRGTLTLNTMHLLANTIVVRNAFQNPVDKQVLGKLVRWNRKHWAKQPLLQRYSPVETVPGVQYQTDEEIFDASTKAAALDPAYARSSGGCALMPEELEGCVDPKPRVYGVERLRIVD…
g836.t1	MPAPLAKGLIIAASVLVAAGIAIYENPQVRQWVDQSRRKIAVALHSLGDDIQPRRPSESSDDFEERKKRREELTRMNRNELIRRAREEGIAVDLDELAMIGTEDAALAERRSRANRTKNFDELVGSDGMLRQEATTTGTERSDGGLRKRGMAGFAAGTAAAAAMSNPFADENVLFDVGDDDNEAPSPKPFIYEEPTDGSRSATLEAGTPPIEAPRAPTFETPLIDLASEPQSVYLHPETHLPSPITPLQTSEAEQAAQSFYSFTSSSEQDDQFEDMSAGTLTPRSERSATTGASIVPSHADDIAILSMQNDGDHDARSEVFSESGFTDAEFSDFEQGDRTGVMTPNSWTDVGSDNESEWDGPQGNGHVSQIHQ
g837.t1	MGHIYSRLVLNHDLSFADLDNMIDAREMDIDELSASLDLVCYVRQVHRELLLSTSSATVFLGFVLEGGGGYLDPGVAEVIEATREALADVGVSWEELLEALRQGQWNVGVEKCEE
g838.t1	MTQQDNTTQMTFPNPEQSTRKRLADLESVVESNRSQITDLLKDMGQIGRDTQYLSDYVRALQAAVVEDDAAARKEMKQSRQDLEHLRAEIEQLSVLVGHLGRVLNIV
g839.t1	MSRLTRKASAMQLLELNAAHVQAEQQALHAEVCNIKDALRRSHTANAMLRGDVERFKNIVRAQDAALRGLHEEVFSVKRELAAFTRLPVVESGTHIVKTNKQHDAKEQMRRR
g840.t1	MVDPEKTAPHKKTRVVSVIAATAIALACGTNYAYSAWAPQFADKLQLSTTQSNVIGTAANMGMYASGIPIGLITDRVNPRLSAVIGMFALLVGYYPIKMAYDGGPGSMSVAMISFYSFVTGVGSCAAFQAALKTATLNWPAHRGSATAFPLAAFGLSAFFYTLIAGIAFPGNTSGLLTMLSLATSLLVLVSIPFLIVVDHKSGTGYSVLPTNERTRRNSNVLHRTNSHHSKFSATVLPPQEVNEDDPSRTSTETSSLLSGPGDLDPEDDAASTHSKKSSHSHCLDITGFALLYKPEFWQLWILMGLLTGVGIMTINNIGHNVQALWNHFDKSVSKDFVAHRQLWHVSIISLGSFFGRLSSGIGSDFIVKRLGHSRFWCVVISATIFAIDQLCAIRIENP…
g841.t1	MGAALSLPFLALPAMGTVWSVAASCCGAATCSAVMGSCGGKCGNSIATRIAYALILLVNSIVSWIMLTDWAMKKLSKLTLDYVDIKCHGEQCYGFVAVQRINFALGLFHVIMALMLVGVRSSKDGRAPIQNGFWAPKILGWIAMIVLTFFIPNSFFIVWGNYFAMAGACLFLLVGLILLVDLAHNWAEYCQEKIEPSESNMWTGLLVGSALFMYLASFAMTVINLLLLLITSVISIHPAVQNVNPRAGLAQSAIVAIYCTYLTLSAVGMEPDDHQCNPLIRARGTRKATIIIGAIVTFVTVAYTTTRAATYGLALGAQGNSYGNGYSQVGADDYEHGLVTQQPESRRDMRQAALRAAVESGSLPASALDDSDSEDEDDSPSKAPRDDERNATQYNYSLF…
g842.t1	MRTPSAIWTVPHSPNDANISRDNAQCIWRRRWQCKYRLLERPRQLQLLNSILRGGSPAAAVQLVVHSIVAQRERLRLQLSGQRERCVHVAMEIFGRGLQDPAERSKALNALYVATGGWETGQRIKREWDMFYDIREDLGNIEGELRILGANHYQGAEDWED
g843.t1	MRPSLHVPWLKNASLLLWHPRAPPQSLVPRRIATTSAHNAAPVDLPRLIVPHGSKDHNSLATFIEYANRAKLSPLRTYYVGTHYEYTAALSLMRLGFSLLRTGAKNDAGIDLIGHWVLAPLNEPLPVIIQCKARTCSLGPCHVRELEGSFRAMPAEWRRKPVLGLLATTLKATKGTMEAIRRSSWPMGFVMISRQGLIQQFVWNRAASDHGLQGVGVTVRHTPRALLVEAEVLKEVEEKTSQQKKRTFKFANAGTQTDIQLTWMGSPIFPERDTLDRETLDLIALAAPKQATEQPKRRPGRPKKGEEVQAAVVRLRRGPKRTRDNAPSPRGGQVAKPRHPLVAPKGGRPKGAKNKVKSPSDVG
g844.t1	MADILTQMQDEVDMLLNIMQSQLFQIRTRAPPSVPEGQQKLSSFAEKEATDKSENATQHSAQPTQTNEPAPPAQPTKQEFNKDLKEMAEDLVVKSQQIEMLIANLPGVHSSEAEQVQRMKELERELEELESERLQAVKDKELLLTKVEEKIMGVGRMR
g845.t1	MTFSNLPALTAWHLHLHGSSGFRDVQASDMLRYRPSLEFSPTSIPPQITPLVPYKPQDHPIAQQPSNYDRKDYAVAQSNLSVSELQSRLRSLLDFARWANNRERASVTLGSFLRQVQEQRAELETKMEDQTSTAVMSFLECLLHLVPNTPDQPCATRDDFYESPDPFLDVKGARSAVLEDQTARKDKAPESLQVTRRHERPSSTTSVDTPFLTTSQQLAVGTNENTIGRDQKTAKTWSEQEIIGLLNEPTQQHPLTAYRVSHVSTGTKRISLQIQISAFINSSGAISFDHAKGLQKEMQAGIETLALTVKEGECYSAEILLHPILTNSTFLQTDQKKNIFSKAQDGSSEDWQTQTVDYEMMGLSADAVKVNLPASMHTSSAMTGSHHITTLHEGCVSYD…
g846.t1	MSVAILATEALSDQYQPFEPDFNMHSTSDCWAPAPWGKDAPMTTTGYMDFVVANPRPSDRQSTFQSSFEQTNLTNRGLNSRIASKYSFKDLDTQSSINTTLAVSTAALCPSSADTIAYDSRTVSHTDTRFNSDHASPSSNCRFSLDNQLRHAGSPKYTMFTDDTNPLSSKRRCDSPQSNFVTHSSTTPQSQVGRRRGSEYVEPGSARAVYLEKNRKAASKCRSKQKRQEEDLVEAARDAERRNKLLKAEVEMLKNSMRDLMQLVGQHTQCPDTRLKLYLQRQADRLAIRGQRNNFFSSLSASLDSGMGSIDKVLSPEGE
g847.t1	MGANQSQPRTISPEPYVSPEERAQAQAEMRAKQQAALDKRFAAQQRKPSPISTVDAPQSTSGSKKLSALEKLSKENCDEARPRCGNCVRLDIHCNWPVIQNQYSASSPQSNVSNHASPLTLEQRPVPSPDNHEPGDADLSIPDLRLLHHWMSNCYQSLRPYEISYKEDTIWRDECTEIAFEHPFLLHGYLALSAVHKAHTVPGADRQSLLLQADSHICRGLAVYRKHLEAPIIERAVPMFMTSTVLFTYNLGSAQLEKPEDPIDGIHHCFRLLAGIKIVVMPFWLQIKDTTVFSHIVDLAEGDDLESLDARGKDDTTPEILALEELTGYLLNTRDREACLTETDQLHTTSVRLRHISVRSDEYSLILSWAAQLQEHFMNLVSAHNPVACVIVVYFAALL…
g848.t1	MSSSQYPLRQSGIYRNLPTFDPSLKDLRALVLGATGISGFHTIRALLDSPRRWSRVYAVSRSPLSKKLLSLLTEEQRSRIKHVSVDMTSPAHDIAQAFRDANVMAEYVFYYAYLPPQSGHSAMDPKTAEELVQVNVPPFKNFLGSLPIAGIRPKRILLQTGGKNYGVHIGRVRTSIVESDPQPRHLAPNFYYPQEDMLRTFCNEHPETDWNMIRPFAVIGATEHASMNTFFSFGVYAAIQALKGEPLRFGADFQSWQFEASHSTARLTGYLSEWVVLEEKCANQSFNAQDGGLLSWDRFFHELARWYGVSEVQGPELDEKKLQTTTMAGAEDCPLGYGPPLVIRNSFTLAQWAADPSKKKAWEEIMSKSNGQLTKNPWDGDLKDFFMGDFAYLAFGTAS…
g849.t1	MQTRSARSGVANAAKGGITKSRKMAVPRRRSAVISTNAAVSSTNKSKTGSISITKGNPSSVSPTIKTTTGDTKYKTWFKHAHFSPFPNFESPTEEQCRRTHEILEQMHGDTVRKNFAEMSNPEQHYPHVMDALVVAQLSQATAWSNAQRAMRNMANVYGSTFAYQKILDGGVEKLQDALRPGGMQNRKAKMLTKLLLDVKERHGNWDLDFLFKLSNEDAMKEVLQYHGIGPKSAFCLLSICLQRQSFAVDTHIYRITGLWGWRPKNASREKAQSHLDAKIPSELKFALHYLFIVHGRECPVCRGNGNVLAECEFERLYSKRA
g850.t1	MILNSRVDVPIDGLGAIHRVDSIFDNPKFKINDLQVAMSYRSLIKRACVAQNERCGVYGFAFYRDGEWIWNVVDDNMFITKSDFDARGAIYDPTSIKETMYKRTHQTGSEALYFASCAHENETWLPLLDEAYAKINGDYDTISGGVSCEAVEDLTEGVTSKILTARVLDKECLWKELKQVNTNLLFSASSLGYYGGGSDARRGLAFNRAYSIINAVDASSEDNTSNHQLVLIRRCPEKLDERYFRGLAGKYMFDLHYILQEKGTEAGDYISRACGAWFGNRSISADVLLEPGVYEVLPKIEAKRNWNAPDVHEVVTKVAERNLQKLRQMSLNYDIANAKETVKSKGNMSASVGAQPATTVSENGEISFGAEETKCANTTGIAELLIKTAKLNVDDKISS…
g851.t1	MTGNFARPQRSTLQFDHYNDVVLLGPPTMRGAIVFGGSSHPKLVDGVCDRLGMKPGSATLGKFKNGETSVTIHTSIRNKDVFIIQSGSEKINDSVMELLIMISACKGGSAKSVTAVMPYFPYSRQSKKKQHRGAITARMVANLLHIAGVNHVITVDLHASQMQGFFKCPVDNLVAEPLLARWVRMNVPDWREAVVVSKNPGGTKRVTSLADAMKLSFGIVTTDRRRAGGGRPWNESAMFEQLRLDGPSDSRELVEAALDADAELTPISKISFDPKSDVGKPKARTGRTPSNPLSRRANGIAGEHPLSKSMRASSIVEPEVPLEPVRTEASNQSEEADGEQSQDESGMDDEEYTDERARNVIHGRLVQGHIVDDTHPSPSMSATSHTTSWRNRPPSEGEN…
g852.t1	MFSKALLLATPALAVPTFFSDQAQAPIQPLDHSQGYTFDPLLHLPGISPYFDAVGFGLEHTAPPGCNVTAASYIIRHGAIYANDAEYEEFIKPFLWKLEKHRHGQWLGPLAFMAKWQSPILEDKLEDLTPSGAVDAARVGKHLLGRYPDLVPQTQRILADKKSRTYDTAKNLITAFPQNDTIDIVRVTTNANGSMESLIPHKSCENFSKTPGTKEQDKFIKIYGTSVAKRLAPFMPFQMTPFDVVGLQQLCGYESAINGKRSDICAVFTDAEWMAYEYSWDLKYAYMVGPMNPLSPYLGFPWLQAQSEIFQNIQEKNHPGGAWSEDQRFFLSFTHREVPPFVATALGLFNSSSGAAEEFPTDHINVFTHPYFRLLYLLTLNQWTRAWRMADLIPFLGHV…
g853.t1	MATNILQPSLALLPQHQQTDTGLTSALASRFHAHMPTATLSSHAIISLNTYTDPSRGVDGGEDGSAVQAAKDLAQRAYMRLGQRSEDQAVVFLGETGAGKTTIRGHMLREFLRYSATPLSKKIEHANFVFEAFTTTKSLTTPSASKSGLLLELQYNTSTSNHATLLGAQYLAHRLERSRLASVPTGERNYHVLYYLLSGTSPAEKKHLHLENVGNDAAGTRTSLGANKRWRYLGHPTQLKVGIDDASGFQDFKTALRKLEFGKDSIAGICEIMATILHIGQLEFETGQSTTPSADDSGGYSHEGGETITVVKNKDCLVPIAQFLGVTISDLEESLRYKSKTLYRERVTVMLDPKGARANADELARSLYSLLVTYVIEQTNSRISSSNEQLTNTVSLVDF…
g854.t1	MSFVNNSRMSVYSTASTGANAPRAATSSTTTLLKALNSAFQHGAPYSLEPSTSLVVNTWANAKTMENGRVGGAVDLELVRKAYEHARRRVEDGTVVLSSLHESTPSLFAPTISGLPVSLPDSFYVALEALKPLTHCVTPQNPSTPRYSALAAVFTIDVLGECRGAEIKLSTAGLDTRQGLLQVPAHAGYRAFDVFYYLNSSSASKQERDILDIQSLDKYSLLNRSGTYDPPSFLPDADDAAAAEDFRNNLKSIGIKGQKLRDVISSLAALLKLGNTLDYFLDEEKLDAACQDCGSLLDISPDMFKQQLGSNEREVAIGGIYEAIVDYVLTQANATIKNDIRKARTGFSSTDSDGSQPGAMTPESEVDGMDLVNITIVEIPNRAVGKAIALRTVFDDTEG…
g855.t1	MPPNRIEQDEIEKYWEIFSSLSNGGTHLDGVQAAPVLKNSHLRDDQLERVWDLADVDNDGKLDFEEFCVAMRLIFDLINGVSSDVPQSLPDWLVPESKAHLVQATRALSGSQTAFETVDDDDTPGLRDGFDWYMSPSDKSKYEEIYTANRDAHGNISFDSLAGLFDSLDNVPDSDVRFAWNLVNPKARESVAKDATLAFLHILNQRSEGYRVPRSVPPSLRASFEKAHIDYDVNYAGTNRWATSHDESTSTGRKAKFGDAYLTRLGVGDRAANYGARAKGTDFGGRTTEDWEEVRLKKQLKELESKIADVEKEAENRRHGRSKDSTPALVKRELESLLDYKRNVLRDLDNDEGGAVKGLGGIREEIDTVKEQVEGLESHLQRRNDVLEDLRRQIDDEKAR
g856.t1	MERPRKRELRELNFRAWDGEQDVFPVQGALDSSMKKNTAFIKRLRTAISASSQSQFVQEIRTLSLHKYLSEIISACYEGLCKLKTPGEIASGVEIVSALHQRFGPTEFTGYIGWYIGRGLATPDKAHLKALSQEVRDREEKERLARQRVLLRIATELWLVGALRSLDDVARPEEAGKNKDNGKLVEGTTKTRTRAENADAEPFPLEVLKDMLGHDREHINLPLVVIFVKAFAWDILGAKTSSAEGRKTVNEDGTTNAEQNEDTSATEDDDQPSKDLPIIASDLQQRFKNILARYFEDVKAHLLRDQKHLAAQGRKNAEAYVKSGEVFEDRQANYEKQMKAQERLITNAQVVADALGVDMPDLKEKDSAANAGDGSIGLIKAGEYLRGRSDGPGIWEDED…
g857.t1	MWEQTGPVVRALLSRADSGEVPDITDPWPVKDIVYVAIVGGVMLAALLEWFLWVAAFTYCLVKVFQKAETISVRLLAVFFGILFFCLRAIFLPIMVVTLPLPAQVVKYFPQQMVDFLQWFAFWSFAGLLTIPWLFCVYQLVTHSVGRAKRIKTVLDEASAPKVVIVMPCYQEIPEILLRTCDSLVDCEYPPSCLHIFLSFDGDQEDELYLNTIEKLGVPLTLDSYPKSIDVIYRSCRITISRFPHGGKRHCQKRTFKLIDKIYTEYLKRNDNLFVLFIDSDCILDKSCIQNFMYEMELKPGSKKNMLAQTGVITSTTEKNSLITLLQDMEYIHGQLFERSVESGCGAVTCLPGALTMLRFSAFRKMAKYYFADKAEQCDDLFDYGKCHLGEDRWLTHLF…
g858.t1	MASKSKARVTAFTDLSSSDAKWVKLQKIDYIDAKGTSRVWEVATRKTRGKAGVDAVAMGNIIYHPSKPPSTIVVLQFRPPVEATTVEWPAGLIDANEQPEEAAVRELYEETGYRGKVVSTSPAVAADPGMTNANMCLCMMEVHLKEGEPEPEQHLDEGEDILRVNVPLAELYEKLEGWAKEGYVIAAKLYHWAAGVQYAMDHPELFKKLDQPGAGA
g859.t1	MIPARAFSSSILKTATRRQFSSSIRRDADFTHAVIGGGVVGLAIARKLQERDGASTVLIEKHGSVGVDNPQVIHAGLYYGTSSLKTKLCLRGKEMMYDLCQKHSVPHRNTGKWIVAQDSAQLDAITKVHEFASSVGVPTRFLSTKEAKEREPDVRAEAGVLESSSTGIVDSHSLMQFLEGDFQNKDGVCAFQSAVVNVEAVDAGRGGWEITTRSPDGEETTITAETLVNSAGLYAVAISNMILPSDRQRKAFYAKGSYFSYSSSRPKPSTLIYPAPVPGHGGLGTHLTLDMGGRVRFGPDVEWTDSPTDYTPNSKNLAAAIDDIQTYLPGIDRSAIAPDYVGIRPKLGKLAATSDKDFQDFYIEREAGYHGFVNLLAIESPGLTSSLAIAEEVERLLYG
g860.t1	MDSKRGPMADLEQAPHPWHQQPNIANLSPASFTAQKLQHATPEHLYLTSRRFFIGPIPTAWLSKHRRDWYKHHLRITYSTRAATFSSDPREARQRRLSGAEGPSSSALFQHSFPQPDELHAEEEDGTQRVEASGANGASAASTSTPQKKLVVIGNEDEEFVDAHSEPEDVHDDDLHLYTHEEGDFDPSKPQLPHRSSTKSYVTASSMPNTADSNAEVDSEDDDAETPRAEEPTQPQMSGLQVLTSEEESGRKSLSKQPLSASTSHGVAVSTTRGASSVDADSTSSLLRKADLNKAPAPIDSEVAPSPSARGILARMKRRSTVGLSKSDSSDGPDAPTQDLTRKGSNLRNLVKFDVPEDSKRQAVHFKAKKAQMTIQRAGTRLRRKSIKDGLVVKMERML…
g861.t1	MRFANIAACISSLLVVTVSASTPAAFEVPGSVPGTAAAPEVDTTIVFETSTYYLSSAIAVTSDTVNSTAEVTKTGYAPPPVEPTTTSEASLYVTASQTFVPVTLWEGSTTRVIFPQNSTAVEIPTGVPANGTSTVIVTATASSSEPVVSTTAKNKTSATASASASVSQVPVNGAGKVTGSALLGMGIVAGFMALL
g862.t1	MSLTNCRFYEEKYPEVESFVMVNVKQIAEMGAYVKLLEYDNIDGMILLSELSRRRIRSIQKLIRVGRNEVVVVLRVDKDKGYIDLSKRRVSPEDIVKCEERYNKSKMVHSIMRHVAEKTQVPIEDIYQTIGWPLNKKYGHSIDAFKLSITNPEVWNDVTFPNDVVKEELQSYIGKRLTPQPTKVRSDIEVTCFGYEGIDAVKEALRTAEAKNTPDNQVKVKLVSPPLYVLTSQCLDKTVGISTLEQAIEDIKASITKAGGDCQVKMAPRAVTENDDAELAALMEKRERENQQVSGDEDESSSDEGEVGAAAAEA
g863.t1	MVKWSQLWNSNGSDRRHRMSDEASALLPTRREHLPPPPIDAKEVTKICLRLKHQIEQVIPYEIEEDKVTKANSPIITQAVLDTANKAGGEDKTACVVYCLLIVNKWFKKQAAAELWDADLHDVRAVAAEMMAKRIIEAEEDMDYLFEEILLKRYATLVDGEPTEPANAVEKAVDLHAVTVIGSSGYQKCIAYLWRGWIVQDDEDPTRFVQYDNKTNTNLWAHLDPDRMRVPRYQNWVQIAVSLIYLGLFTGAVNTINPDADLDVVEGLLYIFTLGFICDEVNKFWKVGRFYISFWNMFNSTLYALLTVSLVFRVIAMSHDHDHENEKGDARGRFNELGYNFLAFTAPMFWMRLLLYLDTFRFFGAMLVVLKVMFRESLIFFLLLFVVLVGFLQAFMGLD…
g864.t1	MTLKPFLTILFLAVAIFAPVSFASASGRYDPYNHCGAPFCGSVGAAAGAGAVARIYRKGPTGDLHEKHTEALSKV
g865.t1	MPRADILVGNACKSFCPSLPPEVWINILSYHSDLAHLWNTVRRVSPTLRACAERAFGDNFLKDVHIEFLLERHNLGGKRGPHEPAISVEFERLGKGDEERLACFRGHMITVPWLRDKTPNIIMQRWHENIEKRKPELPNYTICIGDMVNDTHIPSLTVNVEEYEVQLDWRGMLQLFFREYAKLDASKADWQRGHESSHQTTATRKVKGSKLGSMESPALWQDIEAECRRNLRRKRLKEHYRDNAEMLWAIDSLKYFEKADSSKWSSASPKMLPHLPGAGLGERWFGSTNLVQELYLDECSSMNRIDTQIRLIGKLKGS
g866.t1	MSASTPKQTLAFFGATGGVCNTTLALALKAGYHCTALARTPQKLADMLQIANNVPSKVLDEYLTIYAGDIKDVPAISQTLLNPQDASRLVDTIVFGIGSYPKFQWSLLQPITLQDTKVCEDGTRSIFHAISSLAKQGIASTSTGTRPLFVSISTTGITTKTRDVPLFLVPLYHWTLHVPHMDKQKAEQLLINDHNQHIRDCVVVRPTLMTDAEPKGVHALRIGWEWKGEETEKDGVKEAGPQLGWSVGRKDVGGFLFEKVLCEGGWEGRCHIQTLAAHLCPSPSIKHVVFYDPHFHPLWEFETPEAKVDISSVTESDDSTEAAAYSELEGTPFQGSIVPKYHGSWTIKFEDTVHGKLNTREVRMILLEYTPGIQMRTIKPESWMLEERGKKS
g867.t1	MTMVRQYPPQPQPPLLSPPGPYSNSNSNSSSNSNNHSHSHSHANSHTNSHTNSHTNSSNSHPPAPPPPPPPPHPSLFRHNSTPDAISLGRRPAQYAYPLSRHNSYTSQTSEPGRANPPEHMLRRKTPNGILAAAYDGTSVEDNGAPHATKHILLPVTAESSMPYGMKQDLALRSPDFNRPYGHYQPERSSEWSPSLYFETGSGRSSQHIPQIDSMLNQIPPLQQTQLPYQMYGQQFGGVMGPGMQSPFAPTVSNDQGPFGPYWPDGAYVPYQPAAMRDPRYVHHPGHSWTHPQHHAYMARGYTNAIPGGSAFAPQSYQLNQPNLYQNPGALPLEYSAYAPAHKLAFQTPNLPPHILQARPDYFASGRSTPVSTSLAEYGPQSPNGQSREKVFAWAHTVY…
g868.t1	MSETEGPPPQGPPQGQFQGPPPGMPQPGQQPTPEQIQMMQRQLAAEAEKHGISVQEYVQRLKAQAMAQHQAQMQAQQQAQQQQQQQQQQQPIQPGPPKPEAIAVANFLKSQDLKPRTVIHDEKRKDMFRVLRAIRALSSPAYQKARAKNPLLPEVNDRASAENTFKLLPLSLLALRVTKVDPETAHDGHNHAKPKRVKGLWTVRIEQHQEANDDNYYIWLYEGSQWKQKLYAAGALVLVIAVVLFPLWPLFLRQGVWYLSMGMLGLIGLFFAMAIVRLILFIISMFAAPPGLWLYPNLFEDVGFFDSFRPVWAWQETPEDIKKKKIAKKEKKAAKLAAKANGEAKPSKGKKGAPTPSEHQHQHHHHEHGHVEEIVEDVQPQQEPVAADAAPQPTGSESA…
g869.t1	MSPPDLNTLPASPLQSPSASNGTSRNQSPSASRNMAASPHSLAATAAMNAGIQNEDQRRTSSGSMRRDVERARRRSSVRMNLNLNDPAVPAPGEMQSSPSARSRGPWPHSPHHERAPSLGELHQELEYEQEGQVNRLLNMIRQQQTQIDTLTAGQQQPSNSAVDDSTPTSERSMSLSRSHSQAAHVPHTTISPLPGAAQPRSCSPFNISRQSSFADRSRGGSHAGSPALRPFPGAPHDIHEMLPSPATSRDEGAFYQAETQNLTRENQMLKLRIRELERQLSDMNPTSQITHSPAVHSSLSPAASRDSAEQGTVTQPVSTSAASEE
g870.t1	MASDDNHSLRNLANSRWRFTRSTVNLRETASQSISGPSSNQNKAPKIARASSKMSLFNIFSRPKVERARGHTEVGLAIPMRPQTPPKPAEQSKSALRQNISPSAQQSIRSRSSLMFRPMSMKPPPLDTDTAHWEPPPLFQAFPQSVKHDTVQACVFPPEVLMRTQSQRRQAELIRERIDSARDLSVIEENSTETKKLERSHKRLISNSVLNPAAPELINKIYILVTSGYIMQYAGDGPFDRLPEKVLKLGKDSAAFACDLIPGKHWVLQISSHAHDDGTIEMGPKSSLLSRLRTQNAIGRRAATSFLLVLESAEEMDAWMTTVRKEIENNGGQRAKDESTRTSSSIDGSSGKQSIETSHRYLVQRDPNVITKIAPVDSPHQSYHAVPLKVVTSELEGDR…
g871.t1	MPPRRAATSKASKAASARSSLKATTSNCFERPKEPAATVLPPARAHSSSYHYPLLLDDRAQHGALLNWFKGVEDCRTMPWRKPWLDRSQDGGPEEQIKQTLNKRAYEVWVSEVMLQQTRVSTVIPYFKNWIEKWPTVQDLANANHDEVLAAWKGLGYYSRATRLHEGAKAVVSNPSQTMPNEVFGLLQLPGIGQYTAGAISSIAFGRAEPVLDGNVARVLSRQLGLYFDVKDKKSSDVLWKVADELIKKVSNHPEVEFSAIPGQWNQALMELGSTICTPKSKCEECPIQKTCRAYNEGVALSKNRQSKTAVPDIEDVCTFCDQLDTEDLATVPEEEISDEDVKPTKKRKTITKQSNTLSRYFAIGTPSASSNIDTEDEEAASESKKRKVPISTGVTKSV…
g872.t1	MADIPAPTPVVEWPDYIDMPTGGDVMTTDLNALYDKGDLCWLLIGSVLCWQITPAIGFLYAGMHRRKAALTMIFQSLFCASAVGIQFWVYGYSLYQSHTTNSFIGNLSKAGLHNVLAYPSLANPDIPDVLYACFGFTFVTATAMVLAGAMLERGRMWPSMLFILCWTTFVYYVLAHAEWNPSGWLYKLGVYDFAGSGPVHIASGFSALAWAVMLGPRLDPHKESHHPKMLHFKPHSPFLVCLGTILIWFGWYAFNGASTANISIRSIYVVCNTNLAACGGGLAWALLEYMHTHKFSIIGFCSGIIAGLVGITPAAGFVPIYVAALVGALTSCASFYTVRYKYLLPVDDGLDIFAIHGVGGFVGDILTGFFAANYVPAMDGVNNTYEGGWWDRNWKQMGY…
g873.t1	MATNASLTMKSTIAILSLAAITAASPDPQVTPRRAQLGKRQADPALLSSPPPTASFPSNMAPGYTVFMFDYT
g874.t1	MNIKFTQRATFLSSFQGRFIMLNSVDDWQKIFLPLTFLCSGYVQYGLPDSLQSTGGAAVGGRRASRNQKTNMLVWVVSVSVLFWVVSNSVLSVSASTAVPHHHIPQPFQHLNRRAVDVSAEWEKAWCKGSKLLQAMIRSEAEAAAYVTPVRSPWDGDLVQQFRRWGYRELEDYRSELCDFGPDQHNLQRAFSELGIGIASSVDGGPNHCFYVEHKYGPTVQRPPDGQWPELDQQYYMVGEKRYRETQAYSTIGINPSAGAVYFLNRLSPTQAALENWGNPEVRKAWLPALASSSDHAWGFWNRVNTANLAGIRKIFSCMITNEVTLALITEALRSYPLSPGEERPNGVQKWPGTTLPMRYDAAQALLGSPNGLGVGYFLAQHKHRLGNKAVEKVTVFRP…
g875.t1	MVLARVANFLTNGETTHNLVEERGRDVAVAMDSVASSAAGTAKVITEEIEDDEGRPPYIHAMLAGGIGGTTGDMLMHSLDTVKTRQQGDPHMPPKYTSMGSTYYTIWRQEGFRKGLYGGVKPAFLGSFGGTVCFFGTYEWSKRYMIDNGITPSVAYFAAGLLGDLAAAPAYVPSEVLKTRLQLQGRYNNPFFNSGYNYRSTIDAARVIVRTEGFGALFHGYKATLWRDLPFSALQFTFYEKERDLAKSYMGSNNIGLLLEIATAASAGGAAGVITTPLDVVKTRIQTQQPEHSASTRAPTKSAITPTSSSKHTSTLRPTTTHVSQNRPISTSSPSTTLKAHGAATLDTSSVFTGLKIIYKTEGIAGWFRGVGPRFVWTSVQSGTMLVLYQTLLRHFEQH…
g876.t1	MSHSWLQKKRKGELIELAQTAKLADADSYLKDDLVLLLENHLNNNETAFATRPEFRDYYGRGGSPVKRERSSPEGLTTVKTTRRRTLVKASSEEPTPPVTTRTPRTIAQPTAQSAAQSAAQSASKTVQSASQSLSRTAQDLTQSLSQQTPRAIPRRVSEIINEVDIPASPSQLAEVADQSIQAAKTKVSELWDRTRVDEFKEFVRENVSSVAAIQTLILLIEAAGLQFNTLQTTPAVALDSANSHYLHIPDFWTLLTSEWWAPASLWSLTSWVLPFIFSYFFNLTLRSNTNHKTSHRQYPADPLVFNIAKAILAFSAYRLPIIDATLVGEAGLAKAVDLSWGPFSEQSVGVVRNNVPGGYHGLQIGAMVGILVSLYDAALKK
g877.t1	MVYDDVALLSFSLCLQIPGKMRLNANGDRDSFPKRAQLPVVAGTPEGSAWFWGGNDELGRLNLLTPERICKATHENVKTGCVIALSLPLCEPAPPLFGRRPIEHKIKSIGKGAFDDEITINTQSSSQWDGFRHFADPKSGYFYNGIVSEEIEGDDELDEGGPEISRRLGIDAWARHGIVGRGVLLDIYDWSQQNSSYDPFTEHLITTADLKACAKSQGLTFQTGDIILIRTGWLYKYNALTTEDKEDRSKWDVMTHQYAGLEASDDMKDFLHDSYFAAVVSDNVSLEAWPPASFEASLHAALLPLWGMPIGELWDLESLSRQCRQEKRWTFLLTSAPTNVPGGVASPPNALALF
g878.t1	MFFSTLSIAAILAALPSTLALPNVTAKALPADCSSYPLYNEETGNAGPWILNLANSDNADIEGWGDSSVYSYSYSPATGPVMRWGYMTIVSNNQFAKTALQCQSSRLHAWTDTALTRAGAPTNVAWTPLSLSQYPYDASLLYLIDGDAPTLYEHYVGDVKQDGYFLGGYNTTTWGVQWQEATGPGSYNQPFFYMRLLPEGQSLKANETKSFVKIAY
g879.t1	MADEKYSAEQHEYAPRVQQKPSVGRYAATRITTLKPAMAKVQNPIALLRLLNLQQWMFFLVAFFAWSWDAFDFFTVSLTVEPLAESFGKTKKDITWGITLVLMLRSVGSIIFGLAADRYGRKWPFIINNLLFIVLELGTGFCTTYEQFLGVRALFGIAMGGLYGNAAATALEDCPEAARGIISGMLQQGYAFGYLMATVFARAFVNTVGHTWRPLFWFGAGPPVLIIIFRLCLPETQAYQERKRIREEEPNAAKLFMQEGKHALKKHWILLIYMVLLMAGFNFMSHGSQDLYPTMLSNQYNFSANQVTVTQVVANLGAMTGGTLVGYSSSIFGRRLSIIVMCIIGGALLYPYTFTSSNAVIAAAFFQQFCVQGAWGVIPIHLMELSPGSFRTFVVGTSY…
g880.t1	MSTPLLRALCMSRLDGRPGLLSSGGWRLAAGGWVLGRPRPRSRLAHVHGRSDRNGLEGAREAVALALALAFGRRSAARASGKYETALQPPSVGAAPLRERRAASVMTDTTHRASLRLSSRTPSTASTASTASTGPAASPGSADTNNEHGPPSTGHSRDPSSASARLAHTPATPSQLRQAHAPSDRSSSPEETMHRRQSYYADEPGPRQHQHDDVNSLPDSHTPRSPHSTHDGIVEVDMAEPTVRSRLLDAAARDEWVPRPGVHRNYGSFAGSIHSDHSFDAPFPSTAPTADGHAPDATHALLGDALADGLLASDDRKNMSTTRWLAERHGIKSQRMMYLQYYVPVLSWTRQYKWRYLKGDLVAAVTMASFYIPMALSYASNLAHLPPVHGLYSFAINPL…
g881.t1	MVGPAVAAAVAAAVAAAVAAAGACLSRSAQRTLGGKGGSHRHLLRNRQQTRASTLRPRFLGTPTLHHAITSTSTSTPTPTSTSIPTPTSTSIPTPTPTTTPPLPPPPTLTPPPPPPPPPTPDAALRRLPLTPRAHTYRQHTAHPHPPAMSSPTLHARAEAKPFEHRSCLTPATTKKLLDAGYKVNVERSPTNPDYERIFKDSEFEDAGATLVDEGSWTHAPKDHIIIGLKELPEEDWPLQHTMVHFAHCYKQQAGWDKVLARFPRGGGLLYDLEFLHDDSGRRVAAFGYHAGFAGAALAIKTWAWQLTHPNGEPLPGIDTFTQGRGYYNTESDLIAQLKDDVAAGEKVAGRKPTSLVLGALGRCGSGAVDLLHKVGCPDIKKWDLAETKERDGPYPDII…
g882.t1	MASSANAPPASRHAWLHSLTDPPAYCDIEHRLLPPSSLSALAPASSVPYSSPYPFVPPHSTRLPDDFDMVAHRRGPWSQHEDQWLVNLVARNGPHNWVRISQEIGSRSPKQCRERYHQNLKPSLNHDPITPEEGDLIEKIDNAVKNWWNGGQNRRKRNPERPDQRPREYSQTSEHYQYPLAPQHMQHHDDQHDCESRRPSLNPHMHASYGVKLPQPQRFEPYPGSRPQALELYGHSAGVRARGFETPMPSPSGYSSVSADGAPSLITDTGSERSPRGAASPLDITLAPLVGNRDERKNSSTRYLPSTGFVVEDDVHPAAYDPYRRRDSLQLPPLHREAQAPAQAFKGLQHAQHHQQPLLAQPAPQHVHHHSLPRSSSFSVPQHALPGFHSLTEPVLPLP…
g883.t1	MKWAIAQTLAFAAGIHAHGYLSQPMSRTGLNAQAGADTCPECTILEPVTAWPDLDAAQVGRSGPCGYNARVSVDYNQPGPRWGSAPVINYKGGDVVDVQWCVDNNGDHGGMFSYRICQDQALVDKFLTPGYLPTDAEKQAAENCFQAGTLPCTDVSGQTCGYSPDCTQGQGCWRNDWFTCKGFQDTKCRGVDNAPLNSCYTSIAGGYTVSSRIKIPNYVSNHTLLSFKWNSFQTPQVYLTCADIKITGSSGSNPPTTSSKVSSVAPTPTKASSTATATGCATPVATVAVTFNSKTTTVVGQTVKIAGSIAQLGSWNTANAPSLSASKYTSANPLWTTTINLPAGTSFEYKFIKVESNGAVTYESGTNRAYTVPNSCASTATVDATWK
g884.t1	MMFFKAIVAFLLQVTSFVAAADTAAWKTRSIYFVLTDRIARSSSDTGGGPCSNLGKYCGGTFKGLESKLDYIKGLGFDAIWITPVVASTCADGYHGYWAQDLYAINSNYGTAADLKSLVSTAHAKGIYVMVDVVANHMGFANVADNRPAPLNQASSYHSVCNIDYSNQSSVENCRIANLPDINTQSSEIRTLLNTWVSWLVKEYSFDGVRIDTVKHVEKDFWPGFSSAIGAYSVGEVFDGDPAYLAGYANLMPGLLNYAVYYPMNNFYQQKGSSQALVDMINTVSTFPDPAALASFLDNHDNPRWLNQKNDQTLLKNALAFVILARGIPILYYGTEQGYAGGADPANREDLWRSSFNTNTNLYQSIAKLTAARKAAGGLAGNDHTHLYVAETAYAWSRA…
g885.t1	MATAATPPPLGYESDLDNPKDVIRTINFVTQALTLTFCTLFVWIRAYHKFRTVGLDLAVDDYLTFVSWILMTGYCIAGFILSIHGGGYHMWDISALTAEKFLQAAYTATVFYAPMTLAIKLSLLTLITRIFSPFKRRIQGIYVLGGLLVVYYIVSLILKVRICWPIAAYWQGDQSKCLNQSAVITADSIISTVTDAIILVLPLPLTWSLQLPTTKKLRVGGMLAVGGLATAFSGWRLNLILTHGKSQDMTVLFVQIVMSGNAEAGIALICTCLPAFVAQFNILKDRVGYGSSRGTDARYEASGPHKLSTFRSGHLGTGKSKRSGGFETWSDEAELVTQVKSSLEGEPAQSGGIVRRVEVTHTVTYAASNSDDGKKSLV
g886.t1	MAVSVGPSSKLFEPLTIGNGKIKLEHRVVLAPLTRNRGTPLEPESTPEKPNRIWLPNDLMVEYYTQRTSKGGLVITEGVPPSLEGNGMPGVPGLFIEEQKAGWKKIAQAIHAQGGYAYLQLWHSGRANIPQMTGTPIVSPSGLPWDSPEECFAYPPPHTSKQARYVDYPPIELTTEHIKKTIQDYVRTAKWAIECGFDGVEVHGGNGYLPEQFLASNVNKRTDAYGGSPEKRCTFTLELMEELSKAIGDENLAIRLSPFGLFNQIRCEQRMETWTTLCRKLKEAHPNLSYVSFIEPRYEQIHNENEKQKFLDSWGLGSIDLTPFRNIFGATPFFSAGGFDDTNSWGVLESGKYDALLYGRYFISNPDLPRRLKEGLPLAPYDRSRFYGPFENNSVCYTD…
g887.t1	MVTFTSIPEGEKPSISIHPTNKIAKINENIYGGFTEHMGRCIYGGIYDPGNPLSDENGFRKDVIEAFQELKVPVVRYPGGNFVATYDWRDGVGPRDQRPARPELAWIGTESNEFGTDEFMKWCEVVGTEPYLCLNFGTGTLAEALGWLEYCNSDRNSYYANLRRKNGREKPYNVKYWALGNECWGPWQVEQMTKEDYAKKAWQWAKALKLLDPTITLILCGETGYSSWDYYVLNQCVKWSVHGLSGDTTKSFIDMHSIHIYTADNEHLPNATAPRAAERAIQMTSALIDLARIENKVPETVPRPTICFDEWNVWDPVRAPGEEGAEEKYTLSDALAVAVFLNGFIRQAKDMGMANIAQSVNVISPLMTTKDGLIKQTIWWPLLLFSKYMRGHTIALNVK…
g888.t1	MALPPKWYQFLVGLFASLGSLLYGYDLGVIAQVIASQSFNAEFKPETNETGAVVSVFTGGAFFGAALAGFAGDRLGRRWTIFVGAIIFCLGGALQTGAQSLAYLYSGRAIAGLGVGTLCMIIPLYQAELAHPSIRGRITALQQFMLGVGSLCAAWISYGTYIGFSPTNNGQWRTPLGIQVIPAVLLAALIMIFPESPRWLIDHGHVEKGLQTLARLHAHGDESDPWVQAEFQQIQDTITFEHEHEAKSFIELFKDKSCFRRVFLACAIQGSVQMTGVSAIQYYSVEIYSQMGISGDDTLKYQAISSIIALIAQALCILFIDQFGRRWPLILGNLGNMVTFIISTIMLALFPPGSSNNTAAAWGFIVITWVYNFSFSATCGPLSWIIPAEIFDTKTRSKG…
g889.t1	MWFRKKESDIEMSGLQGQKHYQGRPEETEYRPLNWKKIFLSPKYIPWHILGLAILIATVLLTLYHDEVVDTLRPFSEKVRDLGPAGWLIPVVILVVISFPPLFGHEIIALLCGVVYGLWVGFALVAAGTFLVGTWFAFKYLFRRKALNLERTNLNYGAMARLTRDGGFFIVLIIRLSAIPAHFSTAVFSTCDVKFWHFIVATLLSLPKQIFLVYLGVLLVQKDNDGMVKTIMFGAVFLITIAMGAWIWVKMAKIKKVLLEEQEQRRVKSMESQVNLVPDVKSAFEMRYDDEPAEFTVQPTQPTKMV
g890.t1	MSEKKTLGEVAIVTTPDLSTGEVESQGFDHAATKKLLRKLDWHIIPFMSLIYLLCFLDRTNIGNARLDHLEQDLKLHGLQYNDCLAVLFPFYIAAEIPSNIMMKRIRPSIWLTFIMFFWSAAMICQGFVSNYSGLMATRVFLGVFEGGLFPGVNFYITQWFARHECGFRMALFFSAATLAGAFGGILARGIAEMSGVGGRAAWSWIFILEGILSILISVVAYWCINDYPATATFLSPEERHEVERRLHKDHGHLSNDFDMKYVWQAIGDWKIYIFMFICMAGFCPIYSFALFLPTIIKNMGYTANDAQLMSVPPYVCACFFTIAASWYADRVRKRGVFLLGFQLIAIAGFSMLAATAKPSVQYAGTVLAAIGIYPQIPLGMAWNSANIGGSLKRGTGIA…
g891.t1	MAQWADASTTSQIEHSSWDVDLRDFDESYDPTYDLEANCPMCRTHTTAAPDESLARQLEQRYPTTYAERRVEEEVERGSRVGQDGVEGIMILIGNKHRLVRGSEDANQHDWTFFVRTSRPDLVEEVRVELHPTFRPPRVVLRRAPYEVRRLGWGYFTLEAEVILKAPYSWVVDNSGTRQRDLELTWTLDFTGRGRQGRVRARVRRLEGLGGRTLRTRPAPPNIPNTDGDDEEDDRDYDNSDGENPSEDEEEDISEFVEPPRR
g892.t1	MDLSRYFSIRRRQRSRDTQGVERENIQSYLPLLASPINEDAREALSNRASDVEKLTIAMGTAESLATTILAGNGRTSSGNIVIYKPHHEASTVELFYDLFFVANLGKRNPIVSSNGALTYLAYFTAMHQHTDAQSLVNYLKLFTLLWFTWLSTTLFDVRFSFDSVWYRLHKAVQFGVFTGFVFAGPVFDKYSNSYDGESYRHFAIVLVVSRCCIAVQYGVVMWQGRMFRQTLLPLGLSTAVHLAAAAAYAVTLVFFPKGLVGLEEQVAWVVIAIVEGLTVLLIAMTWRIVSFKYTHIVERLQLLTLIIIGEGIIGMIKSVACITKGQAKNNATELGSVIAAVVLLYLVYMLYFDQFSEDRFGTLRQQIWSLLHYPLHMAIVICVEGNTALIVWNSAVQA…
g893.t1	MTTGEKKYSGEFVHETYNGDDVQHGTVTDNSDDLQRHLGNRQIQLIAIGGSIGTALFVSIGGALNKGGPLGLLLAYAGYSCVIALVNNAMAEMATYMPVSGGFIRMAGHWVDDALGFMAGWNFFLYEALLIPFEITALNIVLKYWRDDIPAAAVCAAVIVLYAACNVLAVKAYGEAEFWLSGGKVLLILILYCFTFITMVGGNPKKDAYGFRYWRDPGPLGSLYTTGDLGHFEGFLGALWAASFCIVGPEYISMVSGEAKRPRVYIKSAFKTVYFRFGAFFILGALCVGIVLPYNDPQLVSVLTSGESSAAASPYVIAMSNLGIGGLPHLVNALLITSIFSAGNTYTYCAVRSLYSLSIEGRAPKFLRKCTANGVPIYCFVVVMIFPFLSFLQLSDSSA…
g894.t1	MSNGRLAFAQRYLITNMSQINDPLKVAVVGAGIGQSIHHSLSAKLQNSLDPGGLSAAIALRNVGHAVTVYEKYPSAFTSTTSPLSNAIALGANINRIIDKWGFDFPKAKPGVNKQERVFHGETLQQLHHIDFKYNREEFGYDWLLMRRQALHEGLLSIAMATPSMLLPIDIRMDQEVIALSPEKGALTLREGREVVSDLVVVADGVHSKLIDTITNNTTPPLRAGRTAYRFKISREQIMADPDLRALYEKEDEGMSYFQIPEKRIYFLVIQADGGESWYGLLIHPAIATNIDAIQKYNVEGSKTELQKLAENLHPTVRKLCNLAATPLLWTICCREPLTSCVNGRAVAIGDACHPHLPSHGQGAAAAAEDAASLGVFLSGIAQPFLPTKVPAALQQWES…
g895.t1	MCRWFAYISPTEPCLLSDVLITPANSISKQCSEHYLPRLLPHNKDKDLDHTSDELLRMRNSLLNMDGLGIAWYTEASSSYVKHVTGPRPALYKSQNPPINDFNFKSLCENTETHCVFAHIRASSGSVVTQVNSHPFVFGRHVFMHNGVISNFSAIRRDLTNLLSFDAYCNIFGSTDSEHAAALYITNLTNHGDKSTWEKPYSLKAMFAAIRKTIVQILQLQHSKLGSSNTPNSLNFCTTDSTKLLAIRFRNHTTQQPPSLYWSEFAGRTLNTKYPGHPDGKELINEEAVLDKEENIGKHTIVASEPTTYDENEWHLIQANHALLVDEEGEEMEVKIEYDEELNAKDPKFDAKE
g896.t1	MSRYQFRRLSPIQVPATRSKRQEAGLGAVGPGSEGEGLESPDSPDSSPSTTGAPSGDKSGSDDDDGALPSPKESVTSIITMPNLSTSKASSSSTSLPSTSSSGPASTISSRQSVTSIPSSTSTLRSNSSPSFAPTPTSQGIGAISPPGAYPTSVLIVTSTILSSTTLPTSSASSTFIYSSKTQGFSGKVARPTQPLTATISLLPPSPPDFTGSPAEDNDSPIRKRPEHTLMSKGAEAAAVTLSIIGAIALVVGIILYCRRRRRRRDEKLEAELERDAANYAAIRASETAHVNNAIAPFAANGPHMTQSTNRSNTLFGPGSYARPETVSSTLDRSHIAMPQPTPNPFADPPLNKAYDVLAGRPRSTTLTDRGSWVKNPFKDPESERFDPFGELQAKARRE…
g897.t1	MSPVGKPGRSPPSRNSENEKKGAGSVDDDIKPDDAQGGKGPWADKTSWLLDSIAFSAAIAADTLLPIMDLVFEKLVTAFNGFAVGTIGPAGYRFQVNNYTLYFVYLFVAKFALVYIHSVLISIAAIRATWAPRIDLSKHILRQNIAYFDSDAAASVTVQATTNGNSVNDDISEKLTLTIHGVSTFVSAFIVAFIIQWKLTLITIGIVLTIFIVTGICVGIDTKNGAQLLPIYSKAGLIAEKVFATVRTVHSFRLNPLLSKRYDKLLGDAMEVGMKKSPNLAVLFLPELFCVYCGYGLAFWQGIRRYQSGEISEVGDVFTVTIAVIFAATAMTQIAPQILALEAGFSRRLRRLEFKLEEETGERFARSAALAAEAVSAIRTLSSLALEKIYESFSSMMFW…
g898.t1	MAEATTPTPFEGETAINSQSGYARELLTKVVGSTPSIGQNKEIRSALNALGELVTRQGHVNIPTTSTTHSLINRSLSEVDAGKLERPPWPVVKEMLERATKYPTMAFAVIFPFFKMRNLFEIFEEGYEDPGHCDAPRRILAYGVGYNLFTVFSTMPWSGALDTSNLRRYAVMCKYHMEVAVSQLDVFIPASYENVMALVLGAACAIEMCKPSLAWVLTTMAAGTSQIMGYHRYQTFQNDKEEERNSKIHLFWMIYMFDKQLSLRLGRASVIQDWDMSLPLITSTPTPAAMALGANQMITYWIKVAKVQGQTYEKLFSPAAFLTSPEARTRTAIDLVNAMNQAWYERGEASAMDVSPLTIGEDLSKRRKIALASPNDTEVPSKRKRLGQPPFGASLPPDE…
g899.t1	MLLKSQALFLLSSPVLSANSYPTVSNCVASALSTPSVYGASVLTIDAVESTLESTSISFCNVTLTYTHPGQDDLIKVWLGLPSAWNGRFQGVGGGGWATGSPSEMVPAISRGYAAVSTDGGHDALGQTADYWALLSPGNVNLYALQNFASVALNDMTVLGKQLTEAYYGKPISKSYWSGCSTGGRQGLMMAQRYPDAYDGILAQAPAVNWAEFIPVMFWPQFIMHKLGYFPNQCELDSITAAAISACDELDGFKDGIVGLTGSCDFDPSTVVGQQYTCGNITGSISFEAAEIARATWTGATDGKGNVQWPGIALGAPLSAIAGTTCDRDGRNCTGSPFLISADWHRLFIQKDPAFDLYNYTQAAWDAAFHASVQQYTSIIGTSDPDLSEFKNAGGKMIT…
g900.t1	MMHLLAIIVAIQGVASASITENLGLLQQHPDTSSAYRPVKTQDRVHSPPDPEEIEVVELPLPPVAPNRECGSCSVDINPRRTGCIARDLTNQKFQSGDFTPDGKHVVVNAEFVGAPAAPEAASIYDGEQVMLIKADGSSFSNGDPWKCLSCGVPAGNAQSLDSKKDYPHVFRSGTKAIWGHNILDCDGEQLSSESCTPDRIHIYPIHWPGTNSTPRELRVHPDDSHIGWSSFTAGGQFAYFGRLAFNAAPTDNGPSAPRYDLVDVNLLVDPTRATPLSANGTQLTIDDDAITVGELRGFSGSGNEITYIGYPTESTNIDLYAVHVETGVVRRLTSHPEYADPMAFSADDEWFVTMDTRGSERQMWMAGLRGVPPLVDLVAVMAAASTRNNGVRRFFQPI…
g901.t1	MAPKKGKKKQQDDDWEAELGETVTTENDALAQEAQAAEGAGAEDEAGGGLMAALQRRGKKKNKKGANTEVEGEDRPAADAGDAFADKAPQEASFEDDDDVFAGNYGKKNKKGGAAAPKEEAPAEEAPAEEAPTEAPRMKTKAEKEKEKKEKEKQRKKEMAAKKKATGPVKPEPKAVEAKPVEVAAPTPEPAAAAGGKKKKVPAALAALQKQQEALRKQQEEQARLEAEDKARAEEEERLAEEEAKRKEEAKAAKKQREKEKVEQLKKEGKYMTKAQKEAKAKADLRLKQMLESGAKVAALEGEAEAAKKPKYDDRKKRKQQQEQKEREAREAEEAAKKLAELKLAEEQAAAAAAEAEKARADADAKKGEDSADDWEAQADELDDVKDSWDVDTDEEEER…
g902.t1	MSATALLSRAGAQLASRGPIALRAALARRTPALSALARYYASYPAHTVVSMPALSPTMTAGNIGAWQKKVGDSIAPGDVLVEIETDKAQMDFEFQEEGTIAKILRNAGDKDVAVGSPIAVMVDEGEDVSAFETFSIEDAGGDKKPDTPAKQGNAAEASEPADTGSQTAPPKQHAAPVSQESDSTGNRLETSLQRQPAYSPAVKKLALEKGVPLGSIKGSGRGGAITKEDVDRYKPAGGAPATAAAPAAASYEDIEATSMRKVIATRLTESMQQNPHYFVASTMSVSKLLKLREALNASADGAYKLSVNDLLVKALAVAARKVPAANSSWREMDGKVIIRQHNVVDVSVAVSTPVGLMTPIVKNVNGLGLQSISSQIKDLGKRARDGKLKPEEYQGGSIT…
g903.t1	MSEQVDEEKALGREGQGGRPAHRPCVAAPPSSEGRSESTATGGRRGHFVIARRLVALTPGTEQSTEHEQSTEHEQSTEHEQSTEYEQPAASSQQPAASSQQPAASTQHPALSTQHPAPSMIEGRAPTP
g904.t1	MADHDEPPAAPAAQPAEEERVPEEALQEERSHETFQETSHETFQETSHETFQPDTPEPDTSLAEDEGHTPSAEDEAHAQQDTPEPDTPEPDTPQPDTPQPDTPQPDTPQPDTPQPDTPLPEDEGHTQPDTDTDTRQPAPNVLNVPNVPNGADTPRSSEQIFDHRIHAHPRPRTDSQSTAATAATAATAATRSSLVFVGTALDTIAASKDARKNKKLGDASAAALAAIKREGDPARISPELLFEPLRLASEVANVPVSITALDCIGKLISYSYFSVPADHHPHPHPHPDPDNPDPAPLIDRAIDTICDCFQGEATHPDVQLQIVKSLLAAILNHKIVVHGAGLLKAVRLTYNIFLLSKSSANQQVAQGALTQMVGTVFERVKARIAVKEARVNLDPPSLN…
g905.t1	MAPIAKNNAFGAGSPSWNLSFPEGNLTAAEIIAYLPHWLKSIDVILRFVNHGGRSVTVTHLLHKLRIMPSANYQANSTTIMMHYAMRRAGHEEWTIGTRHEYENDREYDENSLYVGDFRPPRITHPKNVSTKQKGKDVELARNCAADPISFKDLALHIKEHPSGHDALDLTRCVDYALKHPKEQWLFPTDFEKLVKHLGGPLLVTHSHLDSQVFKRYDALFKAHGPGRLPAKYNKKAKTESEIDTDSNTDSDTDTESTSTPEPKPKPKKSNKRTATRKTKKVMREARGSALTGVASLSQGKRGFDEMEEGNDDEGGRRRSGRVKKAPVYFDNDDATDVEIMDTGYVTPRKKRNLSRVPPMPKEEESDFEATEELESDDEKLPIVDEAANDSDFCTPTAA…
g906.t1	MADPKRKAYRTRSGFGDNAPPGAMSFPSKANFTAVELLTFFPNTIYRADVIYRMISNSGTRKSIWAIVNSHRDLENEWSANCCGEAMYKTMQKAGYTHWTIKKHDQWHARRTTSWDRSSLAMDNLQTAQRVTAKDVLFEDLAADVRMMPEGDDALDLTRMVQYCVQNSEGGWRYPVDYEELLELLGGPAKVRGENSDEMVFRRWENKRPPPPLPRPALSLQGTGLPDARKALKGNSLDKRRSVTRTRLGSVSLKAGPLYKRRTVREESAQTGPEDAADMEVVDVSETDGRYGTPYVRQPAEYVPPTPCIVRAPAASTLAQVFQAEGAVGEFDSYNAYAFGGPRLTPPYRSLGQITQPHPWDISGWAENLRWAFEQRILFALSSPEASTWNESPEHMACI…
g907.t1	MYSKSLAATFLVLAPLALAQSGMISKPSATATVSDTEVVTMMWNSEAAATAAVTATVPSMESGMSGMSMDASMTMSNGKGMSGMSGMSGMSGMSMTTATGRAMAGMNMTGSAGRTEVMPGAMGAGWVVISLGAGIGFLAGML
g908.t1	MSSTSNIVPPEKTGKPGRPPVYARDSITNKPIRPAGAPKQKYSARKKAGTGEAVQKATVSAPKRKNTADAPDMQAGSSKKQKCKDPEIGQERAGSTLEDLERNEEESEGGPPRSPTPEIISITANTIFLDTLDHSCFKPCTDEFWAVMYSKEGKGRAPYDAIKWTTHPRHVREAAGLMKAMRPQFCEWMEKDWWPEEMKRLASENVQKMLDEAWGHRAPDQEMVTEPKWELLEIPFELSCEL
g909.t1	MLPANPELGSNMGAQATLFAPPQVTSCNPFLNAQPGFHSGKPKSWPTTMDRHSENPMHRHHYQQQQQQQQQQSLSQPYLQRYQQQSANMSQQQQRRTPQNHDQRQHQQKWQLHNHFHYRQRNNPSMDFTTPFLPQNTQPTIKAAHPEHKSFMMITPSIHNTSGIVKTTQQFSQQYHRSATPKPKALPVTQLPSPQLTPVKHTHNPRPISTKSSIPNMQYKVAPLTSVYKSQQNKLAERAWLEGERQQRKRQYNMRRKELKSDGNALYHSYNEFLWYFPLGRGERSNIYLAGLLANQSMPAEPNSDRGLAIQYAKKNWQCYWELKDLKYVIQQAQEYREKVMAQQQHTPMDGTHATRL
g910.t1	MITPVIKREVSPEQPLAAIPSRRTRGAITSMHALLAPTRNGDCDTKSSVPLKPSPRSKPPVQVKTKMLSTELYRFAADLAALPAPATYRKGFSCNYKARGAGVADSPRAITPSVLSSLSSQAISAPPLPKQTVASIQTHPNHLVLAGHNSTRLTRILSHGFPLRTYSRHNAHTAAMEGFPFDQCNATGDVAEGDMSMFNTNMLFPAGIPDMVTLTRNEYQTQQVYTQILQDSNFATQQKVDKQHVVISELADFNRHMHSTMHKLDARVAQLEHDNAYFRSIAASHAVPSLPVQAPSGTVNDGLPENNNRSPFSRLSQKQKLDNSSAKRPVADAFAAEGVTMPGRTKYRKKLQVNIPGKENGVPLGLGLPTPMPSALQPASSSAVAAAFLNTPRTPYTPG…
g911.t1	MPTNVLIVGAGAIGAFYASRLALVPSLSVSVICRSNYKAVKANGFQVTSPQYGDYTFTPTHTFPNPDAARKEKIQWDYIVVSTKALPDVSDDSEILEGLVGNETAIVLIQNGLGVEEPYARRFPGAAICSAVTIATCAQPSHGQIKHNRWTRINSGPYLPHLDTGKPKPTDRAAEDKNRAFIAALLEGGIKDASAYTHAKLQLVRWHKIAINASMNPSSVLTLGSTNHAMSNDAELQRHLKGVMQEILDTAPKVLGQPLPADFATPDAIIRSTQRNTSGSKPSMAMDWEQGKRMEIEVILGNPIRIARERGFEMPRLQTLYALVRMAQEVREKSKAKL
g912.t1	MRKLAGGRELAGFVMLSVPRACKLGKLQASAAQDPTPSPSDRNIAMARFGNARDLGQLWLRGTRRRLHSTASTCPRSSASTYSLRYGPPVLLATLGAGYYASSRPIQLDAPSAWSSWSPAVSRSQKRSSSSAAQKAEREKSGPDQDRPGEQDAPSQTRIAQGYSGEEDKAGGVKSAWQTISSSLASPTTSVTYIGDSILDYVIPHWAKVLPGFIKKLQNELSMAPGSLAEEIWYEANDPETNPEITWDASVRVSDQLCDEELSFREKRSLFTKAALARYLDIPEATIHPDDVPVIAMCGSGGGLRALVAGTASYLSAKEHGLFDCVTYTAGVSGSCWLQTLYYSDITQRSHAKLIRHLKNRLGVHIAFPPDALELLVSAPTNKYLLSGLVEKAKGVPDA…
g913.t1	MQEHPPTHGDSAKTSQPASRDSAGHVSEVLEQTTAGTHHVFGSAARQGLSYASSAFPTAVIRGAKQPPHIALCAPPSSLMSRHCCIYGQQRTNLIRMTRSSNYGRLALLDAIPRKVKTRQCEKWQAMGQDFITDVLARFEEFARILQELLENDTCTSDAHKRVRKALSKQLPAFNYALAEAKSQFPESEVQRPAKKARKSKVKTEVDSS
g914.t1	MGKSSLLCSVLDRDVVDVSSYSSACTAFPTIIAYKDGASDDSVESDVVVEYLGHGEIRDYVEEQAKSYSFAFPRKCRGKALLGVGEGHGGTDSGSGEEGDEIDENGGQMERRKMMKKKKKRRAMKKRRAMKKRGAMKKRKAMKKRRAMKKRKAMKKSLKLRSSKFSTAPEQHEISSASFLMPTETRDVINSWRMRSNIRISRVADSLTLKRLRLETGHVLLRNNLCFLDLPGYGDGNQIRTALVEKFREMADFEIVVAPAQRIVTSFTHNKYLARSTRRLGVHHTLLIANNCDQLLDDALSKGVNKIQDAPFLKAKRCLKQFESLLRARKENLHHLRDYRRHILEIAGSAYIKREEQTIKRDLRGKNVEADIILVSARQYSLCREAPYGPEPPAYLNLV…
g915.t1	MESNGAVSPAPPSRASPSPPTTANGSFAADRDTSMANEDAALPQTITAKDPKLAAQMANDLNIVRRKLTGYVGFANLPNQWHRKSVRKGFNFNVMVVGESGLGKSTLVNTLFNTSLYPPKERKPPSIDISKTVSIQSISADIEENGVRLRLTVVDTPGFGDFINNDESWDPIVKNIEQRFDAYLDAENKVNRMNIVDNRIHAVVYFIQPTGHSLKPLDVEVMKKLHTKVNLIPVVAKADTVSDDEIDNFKRRILADIAYHKIQIFEGPRYELDDEETIAENQEIMAKVPFAVVGSNEEVITADGRKVRGRAMPWGVVEVDNEEHCDFVKLRQMLIRTHMEELKENTNNALYENYRSEKLTAMGVQQDSSVFKEINPAVKQEEERSLHEQKLQKMEMEMK…
g916.t1	MAPPPPSNLPLGQRLAALAQTLQFAWFAGHVTLLLASLRYGLSYITFNYNSKWAAFSYRTAFVSACVTYGIVVYKAYRARMRAGKQGGVMALATDENVQYLIMALVWLFMRQVPLAVLPFTVYSIFHVATYVRSNLIPTISPQPAAASAPGAKPQASAVAETIGKFVKEYYDASMTLVALLEIALWFRVVGSALLFQKGSWILLAVYTVFFRARYAQSSFVQDAINQVTARIDAQLANQSTPPAARQGWGTFKNIVRQAADATDIRKYVGGQPGAAPKKAQ
g917.t1	MAYNPLYLPQQPHNNAQIAPLGSYFQHPSRQLADQTQYWAPPPPPPPPPATSITINNTINNVVDYDDSFRFAVPARSYGWAGQSNLYNGQ
g918.t1	MELSPAFSINSDMTDEELDLYFATCGSLSNLPTPPPAKEHPAEKHASPALQVHEFAPELQAHATHLANLVPFNVSTNRPSVSSIRSFLERSCLPDEVVAFAACILDGLSDRFVATWRETLLPSDFVRDLKFFMKTDTCHHASVSPDVLVLAALSLAHGFFSDTRRSAHYWAVGMSRGQFSIQELEATKRSILQDMDYRLCRVTEGMMNSMLQEMQRAETLPTAAAPINENDTVTKTSRRRNFSIDLSGTSMWKNGVQTPEPSP
g919.t1	MATAASSSSPRERRPSTSAPLADLKGPVGPANFTRPKHKRTVTGFGPSEIKAVENSIPEPQREAWRKFMPKPFSTSDEFNKETVRHIETTLARSLFNCDESAAYAGTALAFRDRLVLDWNKTQQSQTFADQKRVYYLSLEFLMGRALDNAMLNVEQKDIATKGLSDLGFRMEDVVSQEHDAALGNGGLGRLAACFLDSMASLNYPAWGYGLRYRYGIFKQEIVDGYQVEVPDYWLDFNPWEFQRHDITVDIQFYGHVNRWQDDEGKQQCSWEGGEIVQAVAYDVPVPGYKTGTCNNLRLWGSKAASGEFDFQKFNSGEYESSVADQQRAETISAVLYPNDNLERGKELRLKQQYFWCAASLYDIVRRFKKSKRAWSEFPNQVAIQLNDTHPTLAIPELL…
g920.t1	MANRGYDVVVDVDQEGDLGHTDLQEDLEFHSSNFENTPSTRGAKIQPDSSSFLPQPATSSPAGSRKRLLWTLSFYAQAFDVDTAEVLRRCTATIYPRANFLDVLEGNPDLYGPVWIATTVVVILFLTGTINQYLAHQGKDHFAYDFKLLSGAAGLVYGYTALVPVGLWGVLKWYGSESANLLECACLYGYANLVWIVVALVSWSPISILNYTFVALGLAFSATFLLRNLYPVLSTTEAKTSKILLVVVLALHAGFAIAIKVLFFAATSPVGPNKGNDEKTDPARMMLSM
g921.t1	MKEFDMPPEWVAFHARRTNTKSSTLRPAAFPSLPLGQPPSEIPPVEVLEIDPELIEESHRSGLEDIHTSISSPAHTDSPDTPRRVTSPHGETYSQEEGGAVQEAYDSAASASTLTASAAPPAQKRKPPRPSSSSSTTTTSVLAAKVAKLTLKKHALESQLRQLHNKLNLTPDPPRGPFLPSPPSSTEQPPPDPKVLKRKVEDLSSEIWRTRHQTRHVVKARRQFFAADPVAVESPAPSIPSAFKESRSEQDQMAVLTCAPPRPERVVVEIEEVDDGDGDGDGDEGLLTWAPPDAGVSEGADYFGFSADAPYFDMWWRMEMGDEPLPSPLDPLPLPLD
g922.t1	MASTREESPMRSSLGMAMRTHHEYTYRLPTPPRVVVPPPTLSTDMPGLVVGEGSEGLDMGFLKHLALEDIVQRNTLIEWAYERRRQAQMILPWLFLGPMVASKDKDFFAREGITMVLAIRSRHNSMSGALQAARDAGLSVATIETPTYHALIGRFHDTTRIINEHVARVRQHALEQTGQPTLGKVLVFCESGNEKSAAVVAAYLMETLDNFDFIKAMQVCQAQRFCVNFDDAIKNILQSYWDILQARRSVSSFNAQHRQPNNIARGYNQCTSSLQPSSTAKSKRSIEDTRDDDDVDMEDSLDPSDALRFQGRDNTPFQTS
g923.t1	MHISIATALSAATLVSGAAIKRQNVPSESVPLTSLFPALPLSIFEQTAGHTLTLEEAIAGVNLTEKINDLAGKVEDKVEDTLDNLDNLIAPNMKVKVAAAAATCSTVRVRQEWDSVSTSDRQNFVDALKCLMGKAPSGQFAASKSRYEDFVALHQTLTPRVHQNAKFLLWHRYYLWTFEQILRDDCGFTGPLPWFDETKYAGKFSQSSIFSSQWMGGIALNGNCVTDGQFANLAINVGPGTGNQPHCLARNGDSAKTINTGQSMVDACNSRATFADMASCSEGGAHAWGHNGIGAVMLDVYGSPADPTFWLHHGFIDRNFRIWQNQNAGVRTTTIDGNDIDGNALTLDNTINVYDFRPDVKIRDILDTAGPTLCYKYNY
g924.t1	MGAEELESTLLLASITAWELSDSQTQQALQMTNRTSDFLTNVWSLNESSTTSPTSVATQHASLYGVNPPAPYPLTTTTSPIQKTQPSHPEHTNFTTVASSLSCNNLNATAEIDCLRAVPFTEIISFLKTRLCPDTVQSAIRSGK
g925.t1	MRVVITGAGGFVGQILAKKLIETDPSTSLVLADVKEPPNPTESKDVRCLAADLTEPSSVDVLFEKAPDAVYILHGIMSSGSEANLGLGLKVNFDSVRHLIDIARVRQPGVKIVFTSSCAVFGRAAVKNVATETDIVPMPESSYGTQKLMIEFLVNDYSRRGLIDGRVVRLPTVFVRAGAPTAAASSFVSGIVREPVNGEDSVLPVDPSIGIWLTSPRALATNLVHAIKVPAEKFGHFRQVLLPGYTATSGEILDALEKIAGKDVRSRVKEQRDEGIQKIVLSWPAKYDTSRAKELGFSEDVGLEQTIKDFIEGEKQKK
g926.t1	MAASSNASTKSDPTPDSSLPPANMDDDNVSKTMQDEETRMKLQREKQDAKRDAQLERERQEDIKSGREVLDKKFQQLEFLMNKSKLYATVMLAQMQRQEDEEKEQDEKTDGQASRREKNAETAAAESQRRATRNSAVNGASTLGKKADSASKKKGRGRPRKENSSIADYFKKEDLEKKVEEEATEKHKDEDNVKTGDIGIQNLKSARQPKLVTGGTMRSYQLEGLEWMLSLYQNGINGILADEMGLGKTIQTISMLAHLWENNSFGPFLIAAPLSTTSNWVAEFEKWTPSIPVMLYHGDKKEREKLRKTRLKNPGTKDFPVVVTSYEICMNDRKFLTHFGWQFIIIDEGHRIKNLDCRLIRELQQFQSANRLLITGTPLQNNLVELWSLLHFLLPTVFD…
g927.t1	MAPAALHDASAVKSENSKAVKVLEELLSKLTVSKAQDEINASASSIATFINGDIEEADAPTKAVDLLKKQLGNKKDAVARERALDAIRAIAQHAQVSAAVEPYLVALLPNVLAAVGDKMSGVKVAAQTAAEAIVAAANPNAVKAIIPHISHSLENAQKWPEKMTDLKCIETLAASAPAQMAFRVPDLIPVISGAMWDTKPEVKKAAYATMEKICALISNKDIERFIPELIKCISKPENVPETVHLLGATTFVTDVHEPTLAIMVPLLERGLVERETAIKRKTAVIIDNMCKLVEDPQIVAAFLPKLMPALEKNYDNLADPEAREKTRQGLDTLIRVGHVKDGKIPEIERYGDISTIAGNLKAVLPSKYKLDDKFTPVVDYIGAIGGQLIDEKDYEGLNW…
g928.t1	MSLPVRSRNGVKFGKELREKEFLFGEGYLNLNHGSFGTYPRQVKEALHCFQDAAEARPDDFIRYKYPVHLNESRIAVTELIKAPPKTVVFVPNATTAVNTILRNLTFAEGDHILYFATIYKACGTTIQYITETTPAKSVKLEYTYPVEDDWLVAAFRQKVREVEDAGGKVKIAVFDTVVSMPGVLVPFQRLTQACKELGVLSLVDGAHAIGHLEVDVGKLDPDFFLSNCHKWLHVPRGCAILYVPVRNQHLIRSTLPTSWGFKTSASVPNSINPKGAFGGDVESEYIGNFEFVGTIDSSPYLCIPKALEWRKDLGGEKVIIEYCTALAQDAGRLLAKSLGTEMMDNKTKTLSQCCMAMVRLPIEVVKAQQTGDTIGLGKDQVGGEVTGWLARKLLDDYN…
g929.t1	MFFKSVVLGGLLAAGHAAALKLGDVNGVLRRGEDLEEVLRRDAGLLATLTQRQDANAADTAPLAALTPASGDASKADLQKWEEQTRAACMKTLGNLNGQASNPSGIAVCYNVPFLDKSTGVFQAELRMYNVSAPVDPWQSVTAAEVSMTLSYLGATVQAMNMNNTKREVSEERARARWSDGTLVKRQTISGMVELKTLMYVGKINSNLMGPAMTQEALQPLLVPQIDLAARNPSTNADVTTTLSNKEASFVNGVFAQKADANAPSNADPTAAAAATSAAFLAAPFVVPGTALAFFPIGLLVTGIWSVFFILSVGLGTYGRIQFRDQYRRRMNAEKARGVRTI
g930.t1	MWHKCGRLAANTSEASALLMEASARDLCSLSALTFAFPINTTFDRRSCLLLTPELPAATITTRVGVASSLIRATRYSVCSVANNGEFFKLAMAHAIWGLPQAPIQFVAHDIYGQPARGANLVQSRTFFSNILFCLDVYQSKYHSNYHEQQPVVERHDKSKFSRFEQIAQVLTQKQPESYPAIYKSINHTNTDCAPTSAAHEFNRRSVAPVTPLVHGFINTSVLSSQGQSLSGWFYDLCRRQGWDAGQIKRIWQWTLSNPRLAILLYVCDDVASWRQASFFDLRDESLPFPEDRLQGIVADARKVVEEQWRATSKEMPMNGGHMDFVARESVPLQSEKVMRTSKNSEKSVDRVRMLGSSDDRVLVRKRFVTTRPSQKTALLEQITKFKQLENKSIAKLLC…
g931.t1	MKRIPLSRCAAQWQAAPSAAPSPSPSPSLRRPSCIAARTVTPRARFQTTAAIPNDAGLHVELPGERAPAARQPAARRSRWPTPLEKLPSPHPSAAERSVKLHALRSRLTLPERFPLQTLARTLVHPSADANPAFNNASLSILGRHLLGYYTTEWLMCNYPRLPMAVVFAAVDAYIGPRALATVAAEWGIEAAAEPGGELDPGLLQFKRIPSGAELPASLRRQPPWSWNLTTTHRIMKTDEFGSDTPAPSPHALKSSPVPMEEAAQSFVRALVGALHLQLGAPLVKRFFRAHFTSRHLDISTLFHFRTPTRDLSKLCAREGFDAPVARLISETGRLSRHPVFIVGVYSAKDKLGEGAGSSLDEARTRAAAAALKAWYLYQPVHVTLPSSTEGELDTSKWR…
g932.t1	MGDRRRHLEPALLHAASYTHRAPRSTHHTPRSTHHTPRSTHPRPLHSCSSPWAEEARSREPPPPPAPRPLLARPLTADRALRYPKHVWSPAGGWYTQPANWRANTAVIGLVLVSIVGMAWSVSAQREYRDKMPEPGRFFPSRYWSTQIVEHEKKRKEQAQ
g933.t1	MANAGSPIVMCTLGMFILDEIEFPAPKPGVKDIVGGAGAYSALGARIFSPPPRSRSVGWIVDCGSDFPGALREYIASWESGVLMRETPGRLTTRGWNGYGEKEHRAFRYTTPKLRLGHEDIQDTDLLWARSFHLICSPARCMELVRNVVQLRTQASPTTERPLFLWEPVPDLCVPGELDRCVQALKHVDVVSPNHGELGGFFGQSTDGAEQVHHRLVESLCGQWLESGIGPNGSGGVVVRSGKDGCLVARRGLRRWMPAYHEDSDKVVDPTGGGNGFLGGLAVGLVRCGGVAELEEAAVWGSVSASFAIEQVGMPVLAHDAQGETWNGVSVSERMAAFKQRLDRYVQP
g934.t1	MQRWGLVGAYPAPPPPPAPAPPPPPAPPPAPAPPPPPPPAPPPPPAPPPAPAPAPAPSPPPAPPPPPPPPPPPPPNRTMSEPEKRSIGPRDAGEKKPDGVLTSMIRRLEAATSRLEDIASSSFAQDDSASNGGAAAAVAAGGASVAPAAAAPTPKAVESLPPSLAAFDELASTELHTWLDLSRKLGSVIETQSKAVEGAFAAQRRFLTIATRAKKPDDHTIMGFLKDLQASMEKTDEVRQSNREPALKDPLSMVADGVGSLGWVTIGGGGGPKPHEYITELFGGAQMYGNKVLKEYREKPDKTNVEWVQAYYKLFKALAEYAKKHHPTGVAWNSNGIDAKEAARNLSAAPSGPAAAAIPPPPGPPPPPGPPPPPGAAPPAKKAAPDMNAVFDDLNRGAD…
g935.t1	MRHANTRRLPLTRQEEQSLVAIPQLSPSVQAKITRSSPQKKDQCRAFIQKAVHTLSPTESSAMLATAPGGHPVDPVLPSCSRCVTKGIKCDPRSTRRTSDNNHRPLSTKKPFLSSKRFATPGILSSSSAFPSPRSIPSSRQQGVMRAPSHIDFRTAVKMSQQAAIISGVPKLAPLPTYHNQIVDECYSYDLSPEPDLCRFTPESEQAFSRGTTPQTPAEPMGYHEPFSLVDDLDYLDCQTWSGNELVPVGLGFSDMEMPAEEWMTPTPEPEEMAQANMFALNPSFATPLQVHSNMEATSNGMTADWSSFQTPAQNHSASDAKPATALSSLGDCSFDSGIVMQSEWTQSQPHGTYVHMGHMVTSAPYVPKMQGMPDNAPVWEDVFMPSSVPN
g936.t1	MSTPEYCELDPTIFLADGDHPEKAANPPDLLILNQPITDFASFSRLWKHTNYRICADGGANRLHDMFNGKLEKQRAQYVGDQSAFHLHTGHLTLTKLPNIIHGDLDSLRDDVRAYYESHDVEVLRDGDQYSTDFGKTLSKISARHNAASQKDVLILGTLAGRVDQGLGLLHEMMREETKHPNLRLWLFSESSLSMILRSRRTAVRSLLSSGLFTENLGLVPVYGPATISTTGLEWDVKDWFTQMGGQVSTSNHVKADEVQVETDQPILFTIERAPLEQQL
g937.t1	MIPPQKAVSRPASRGPLTREAGDVEQSGRSTASLNAEKIASSLRNIDTEASSSQTAFFHPMHTASPNHDASSSSESGSTSSLPQTQLLLTSRSPSPSPSLKLARSSTHSENTIESKDSKSSGDAPPHTTQNQVESTLDLKSQRRPFLRPPHQHPLRTRHKSTQELTSHNARPVGSPLTMQDLGSDYTRYFSPYFAGARSISSEQLADQSAPTSGTTTPLATVYPVNPFLTPNLTPTASTTKINILYDPEKNVSLIDDRLAAPYEEKGMATWPLIGDEDEPDDEMHMPRPDDDIKYRVKLKDHFSRDNIVSTIGLFIMVVGLFFVFLGLPILSALGIIGYNSFYGTPLSQMSKYPQAEPWAIVNNKKYPLLQNIRTGLIDPDTPKYAMEKKGEFGDEYEL…
g938.t1	MTGSTSYSLLTSGLHYRDYQMLPSKTDDLDTLRVIHSPEDSTPDDHNAQPSDDGRDEHIHIKSQALKGLKPSFHRNTYSGALFFNICAFVLPALYGTLSKLWVANIDSSMVVTTDIYTYIGVVAEVLNEGLPRASYLIIGDTASRGFRERVQLAHTLIFFQSILGLIMSIGFVGGASTFAKGFVPVEVRDVSVTYVRISAFSAFSSAVEYAVNTSTRALDKPDVPLVISSVKFAINIVLNLIIISKFHVGGITPTVNMQAGISLACNLTSAFAGLAYFIHTTSFSKISAIKQDRSSHSLKPSLSSLRVLFKPGFVFFTESAIRNALYLWLVHGIVGLGSDYATAWGVFSTIRWGLIMVPVSALEATTLTFIGHSWGHVRASLDTLDNPQPRLSSRQLWH…
g939.t1	MAPLTRLIALAASLAVSSATTIAEINGNKFLSPLKDQTVSNVTGVITAKGPDGLWIRSTTPDRDERTSDSVYVFGRTFGANLTVGDAITIGGKVLEYRSNKDYIYLTEVSNPVLEKVVSKGNKVSPLVIGKDTGNPPTEQYSSLDGGDVFAVPNNKSQISVANPTLEPKKYGLDFWESLTGELVTVKKARALTKPNQYGDTWVAGSWKVTGTNDRDGLTTTDKDANPETIIVGSPLDGTKNPTETRMGDSLEEITGIVTYAFGYYRILPSTALKVTGSKKPLSPKPTKLESKNDCGGITFGAYNVENLAPTSSHLPHVAEQIVDYLRSPDVVFIQEVQDDNGATNDAVVSANLTLSTLTKAISAAGGPNYTFVDIAPVDDKDGGQLGGNIRVAYLYKPS…
g940.t1	MVAEKSTATGLDVADPHTTLPADNEKSAAVYADNSDVSSSGVGEYDDLPDPDVGKSDEERARLDKALVWKMDCWLIPWLSLLYLLSFLDRTNIGNARVAKMEPDLHMGGRDYNNALTIFFISYAGFEPLTNILIKKWSPRVFFTSIILAWGIIMTLMGVVHNKAGLLACRWFLGIAEAGLFPGVNYYLSCWYKRQELGLRAAMFFSAAALAGSFGGLLAAAISGMNGVGGYAGWRWIFIIEGLMTVVVGFVCWWMTFNFPDTASFLTADEKLRALRRLRADGQSRATIGHIDRRHVYAALTDWKTWGYAVIYMGCLCPLYCFSLFLPTILLGMGYTGTKAQLMSVPPYAVAAAMTVVTGFIADRTKWRGYCNMVIALIGCLGFAMLLATDNVHVQYAGT…
g941.t1	MSADDIDFDMGDDPSYDVPSHTTPLDAAEEWLSASPDTADSFMFPAPPLPLPDTTYPDTELMPHFSGEQAAQQNQTPSATPRFDPTALLNPKSAPKRPASSNGEEVERGRADPTTAGQVSLVERLHNVQERTASPAKRVKTADEQERKKASSNSSHFSGSSALDLNKNGHTPIPPPPQVDLTMSDDDEVEVVQDNMSQMICIGKVEQAYIMMHTVPFPDTKKYIGNHGALGRIKVAFRRAGQRTNLTVLVTDAAGKEFGRVDNKTAQAIVPLIDSAKTSGMMWMAWTDPRKRQNNEPTTPGASHHGLIAMTLQLYCPRKNAHGIGKYLKNKNAKLTRPMWELNSSDPLWKPRYLDNGRKKFIHVITGQEVEIKPKSCRGGILADEMGLGKTLSVLSLVA…
g942.t1	MRVAASTTLPTHGDTANTMSRQSMAPNRSLSLTEELEKLEQSITLTLQEIDHNFSRAHRIVTTGILPIIEQYGKHSEAVWEGSKFWKQFFEASANVSLSGYEAPQEDSIAQDDTHESVTYEDDETMTGHATREGAITPQRATSSHGEPEDTMTLDSPSMGHSTPGMPQSLRRGRNGDGEELDAEEEAPQFAGLSSPYETLREELGAGPQGSRTPRFEPVTPGKSQALPDMMGFDSSPFVQPTTSKKPHFNQDPLMHHVLDKTFRVQATPLVSPRKYKPTGALTPSAAHRAAPTPRGAAANARLPKWDDSSPPSSPAPQLRADMFSPMKTPRTPGVSIQTPAKGKQRMSAGRDQDFVDYSDDDELDFSPPKTIQFHIPQTKLLQTPAREASRRIVDDLLM…
g943.t1	MIMSLPLPARTVWQASPRIATLSRVSTQTPPWTTRNYATPAARESRTAIVTGSSRGIGKAIALRLANDGYDVCINDVVANKSGCDDVVKEIQALGRKAFTFTADVSNLNEVTDLVQASVSELGPLNTMVANAVYGVFNCYSAAAKQMISQGAGGKLLGAASIVAFKPFALLSHYSASKWAVRGMTQAFAMEMAEHKITVNAYAPGIVGTAMWDLIDEKLGEKTGAKKGDTIKKYTNELIALGRTSVPEDVSSTVSFLAGKDSDYMTGQTIVIDGGIIFT
g944.t1	MRSFTSIAASALAALPLAIASPDPSHKPYNLNDSFYKPERVINTDVVIIGGGGVGTYAAIQLKDQGKKIVVIEQKARIGGHTETYTDPETGYPIDMGVKLYHDEPIVHEWFARFNLSTSKIDFGLTAGPGSQNVDFRTGQVLQGLPAANQTALAAALQRYAAVLQKYPQLDGGFYLPDPVPEDLYMPFGQFVQKYDIADAVQFIFGITSAFGDILELPALQQFRTLSLSLIATTSNFQTSSVMNNSLLFEKATDELLAAKSLLLSSKVLATERISECGSVKVLVDTPKGRKLIIAKKLLITIPPTTTALAKFDTNQDELSLFSQFQAVGYYTSIIRNAGPVNITLQNLALDKPYALPPMPAIYNVNPTANPSLSLVYYGTKLGEIVSDDEAKAAIIADL…
g945.t1	MEFSKCPQAVAYLLWPLAYGLPTGLKHDKLLVHTNIFAVKRISWPNTTGVSFWGGIPYVEPPIGDLRFRPPVTKRSSNETIDASWFGRSSIQYSNGPKPVYSEYLTGFLLTPGQEQSEDCLTLSIWAPTTSNSDEPLPVMIWIHGGGFTSGGSASPYKYGDRLAKDQNVIVVAMNYRLNIFGYPNAVALDGRDVNT
g946.t1	MPRSAIASSIFLSISLAFSADVALSYDTNSLKWAPCDLDFSSEIQLEVAAHAEPLFCATLPVPLDYTNRKNGQFLDLQLIKIKATKEPFKGSVLTNPGGPGGSGVDWIATDGPSIRNDLGGHHDVIGFDPRGTGRTIPFYCIQSNSTSPNNKRAEYNFTIPQDDMYSVLKAKAWRDGGKYAEDCASTPGNSDIAPYISTPFVARDMLKIIDALGEDKLQYWGIYYGTVLGQTFAGMFPDRVKRIVLDSTVRFDDYHAGHWITVTRDTERALVNFFTECVNVGSELCPIANFTGPNATPEDLHNEYAKVFQELLDDPVFMPDDYHPLPWWQPGSITISQILKYSTLASAYRPRQFGELDIIVDIALRRAWDEWIALSTPLPSNSTTPEVPWNLGSNAFHG…
g947.t1	MKAWDEIISHGVTQSRYDKTLRAVWIMGALTTAVEMGFQRPVAGQEITWLRDNKDRFTTLAEEGDEDMQQLLLELRTRDDFAAVSGNDDVVR
g948.t1	MAPFRVAHAGLSASAKVTWAADAHLPYLLSTKGKKHYEVVALLNSFVEAAKSTKATFDLPADVKTYGDPSKLAADPNIDLVVVNTRADVHFPVAEPSVRAGKGLFIEWPLTEDLTKAFELTRVQLYHSSVVGLQGRVVPLTLRLKEILATGIIGKVLNSEVHACGKLTPRDSLPESLAYFADRRGDEIFPTLLDRYSGPRRISLARTGKLPETWDPTHQILLSVHGSLEDETVITVPGATLVATFRLGLQVKGKPDIAWTINGEKGELRMNAPGPFLQARNSFDGPIEIAHHDHATDKVTELDWDWPEWQKNLGLRARSCAELYGKFAEWIEDGRPEIVPEGMQWPRLEDGVALMIEFDILYRQISPYW
g949.t1	MARLDGYNVSSVPEKGLEREAAIAQAHGFYIRHPPRPHILFEQVTEERHLFQTIHMGAVDVDIEKWLLVVDGLVERPFALTFEQLLKLPSTSVHSVHECFGSPLAPATIALWRVGNVTWTGVSLCVLLAMARPLPSADYVWSEGLDSGTFANVEADCYQKDLPLYKARGEEVLIAYNMNGKPLGRERGGPVRLVVPGWFGTNSTKWLSKITLNKGRALGPYTTRFYNVEDQDDPRHRMKPVWEIDVNSMITHPSPETVVRKSTVNVEGWAWSYDGVVKVEIKASNRDGWHEANLDPRIDFRWQRFTLRLALEPGEYVLTAKATSIDGKSQALSSRRNHVNEVRLKIEG
g950.t1	MIMARPIRVAACHAAPVFLSAKATTQKALSFIKTASKNSANLVIFPETFIPAFPVWSALRAPSQNHGLFKKMTEQSVLADGEEIQALQSAAQEHSIYLSVGFSEKTHYSSGTLFNSNMLIGPDGRVVNLHRKLMPTFFEKLTWAPGDGHGLKVVETPFGNIGMLICGENTNPLARYSLIAQAEQLHISTWPATWPTRVADLDSAQEAKEKNYDNVAANRIRAAAHCFEAKAFGVLCSGHLDDEAIDAIAAGVSDAEHIKSVLKTSQRGATMFLDPTGAAISGFTVDGATGEKKKVDFLQKEEGILYADLNLADCVEGKQYHDVVGGYQRHDVFKLTVNRERQVPIRFHDPPPSAIERNNHDVL
g951.t1	MKSILWTSIFLAAASALPTTLYGRQSNETAPAVPDSITRIRLNPAKVRDSGDTDFTTWTVIEGPSSKFITNDTGLSFALSASSGKLNGNWNKAVYTRIIASLGERVIGEGISTIADNGDNVGGVAIKLSISGLSAGEHSILAWHNAWDALKTAASLTVTVNGKEAAKGIKQSIRTDNIWEAASSYTTFTVNQSEAVEIVYTPDTAGDGRAFLNGFEIDSPSLENQISFPTPVHRDERVVPVENSTDLSASWKAAKTVGALYNVYLGTSPTELKSVATGLSEPSTMLDDISTQETYYWRVDVVSGNSIYAGRIFTFRAAQLAFPGAEGYGRFARGGRGGNVLHVTSLEDSLDEGTLRNALTVAKGPRTIVFDVGGVITTKSRISVSGQYITLAGQTAPGK…
g952.t1	MPRQVAPPPSGEFQVTLSKPFSGTPTQQIEVIGGHHGSASIRRTNTSNNGTSDEKKGDVPADDVKELLSLVSSLRGFPSSASKDLYGADVKVDFNTMEIQWSNGDDDSAADVVGEIAGEQKDEFKRVADSIEALARTFAKKDSAV
g953.t1	MSDAGKQQKGLKKLFHPFNHKASEKLQDLQEKLEHTKLRDAHVKAVHVSHKVGKFKNLFNANHRHDEEHEQATDNKRTRVSQNHRFNSFAPEREGNMVKWYVDGRDYFWAVAEALEKAQETIYIADWWLSPELFLKRPPFYNQKWRLDQILKRRAQAGVKIYVSVYKEVSAALTCNSQHTKKALAGLIKEGEPGYGNINVMRHPDHNVFENASDMTFYWAHHEKFIVIDYAMAFIGGLDLCYGRWDNKQHPLADVHPSGIQNQIFPGQDFNNNRIMDFEGVEDWKSNKLNKLEYGRMPWHDVAMGVIGPAVYDIAEHFALRWNFVKRDKYKRDERYDWITMEGREGEDEDLIGVQRPKFPVGDYVHHPKTPLSTKNLDNRGTVHAQLVRSSADWSMGIQ…
g954.t1	MSVSVIITLATFLPLLFRFGLTSPVPQSDTNYYPSLYPEPSPCVGNCSHIHDPSIFYEDGTYWRFSTSGNIAVATASSLRGPWIYKGPALTEGTKIKVAPDQDIWAPSISKFENTYYIHYSVSTMGSQRSQIGLATSLSISGPWTDHGSLNLPLSDTYNLIDPYVFQESPSDPIYFTFGSYWQGIQQFTIPSSSRLTALDGTTEAIRPLVTNSTAGAAVVEGAITWKHDSAYYLFFSVGACCNTPTRAPYLAPPGDEYHVVVCRADAVTGPYFDRDGRDCQTESGGTTILASHGNVYAPGGQGIMKIEDRRDVIYYHYVKPSIGYEADQFFFGWNFLEWRDGWPIVV
g955.t1	MAPRVFLITGTSTGFGEELVKVVLKNGDHVVATARNSSKLKFDGANDSNSLLVDLDVTNKSSIDKAFDAAIKKFKRVNVVVNNAGYGLSGPFETLSDKQLRQQMEINFFGLIDVTRKALETMRDLKTGGVIQQVTSVGGQIGVPSFSIYCASKWAVEGFTETLSKELKPEWGIKLTCIEPGGFRTDWSGRSMQFGEVKNDAYDHIDPKKNAQARNGTQPGDPAKAAKVFYDLAVMDDPPLRCAVGTDAYKAITAKIDTYKENVENFKEWTNSTDVDGYKAPS
g956.t1	MTELIRDEEVRRRIRLAQEFLDPDDVSRRSYRPDILVMLNRGQRRLTVSVDEIRAHHRELADGLLNQPFDFAEAFDRALKSVVEAFTDRPKSESGPDVVYYCAYIGSFGEYSCNPRTLGSNQLNHMVSLEGIVTKTSLVRPKVVKSVHYNENKQKFHFREYRDQTMTTGAASTSVYPTEDEEGNPLVTEYGYCIYRDHQTISIQEMPERAPAGQLPRSVDVILDDDLVDRVKPGDRIQLVGIYRSLGSRNAGTGSSTFRTLILANNVILLSSKSGGGIAQVSITDTDIRNINKIAKSKRVFDLLSQSLAPSIYGHDYIKKAILLLLLGGQEKNLDNGTHLRGDINILMVGDPSTAKSQLLRFVLNTAPLAIATTGRGSSGVGLTAAVTSDKETGERRLE…
g957.t1	MLQAPQKQRRKRLMKQAREAGITQTKRTIQNSLWDRKKAHMFKAAVQSAISDDQQGQRTYYTHINTAKPIEGYWDSIMFTDEAHERLDDFPDEWILRIWGERFKPENIVEARAITSKAVHFAAWINYYAKAEQLTFYNDEYDNYQPLKRDPSDKKPRRRPKTETQDQFDERMAEWIAREPPQLEIKIPGNSMDQNYYTNNILPVYCKAYQGLVDRSDELRASVPKEQRYTWYFQEDNNPSHGTRNSQSKPALYKKRHKIEAFYHPANSPDLNPIEGIWLIIKNRVKQYIWDLNTIADLKEALQRE
g958.t1	MSSLSMQPFRFLDLPGELRNNIYDLLLCSWDDEPGYEPGSINGLCKRSPSYDALSLLRTNKQIHEEAFDYMMRRNQFVRVTCRGLDVNSLFLGDEMIPAIATDQRKARQFEGYLMHLTLSKPVVSSGAFNFSEHEIMMLRADLPFLCRQLDVETAMTDANATTNEHLSISATVSFSPFHSEMFTPATQQYLLDPIASHVRGISNLSMSGPVSTMIAEAVISQVAQPRWTDPKATLDSIHTGTDVGKRQWQNKEFYSASESWTYSMRTLERMRHSSSWLGLKAAGGEDFVNSTADLYFTLNLLRASFLQVDMASEHADRATAARNGAMSLQHLRKCETASARFAQHADATWVPSNEQASKMLFRQAKCLRLMHANANLVKAVTLIEQAAVLAPNDIVIRD…
g959.t1	MDKNQSLVPLLANLNQQLTKGCCSTAPCPFALTKPDAPLDGLAPALGHGDYYSTPDAIPRPFDGPVLTDQTTSNQDWGNDFDTLSMQNSFSTTNATVYNGYDNFDGSTFRFSHEFPAVLPLEQDKLNQPNFQPTIDVATQASNFAQVAVGQTSSTEGAVILVNSDGLFFCSEPGCDTTYLRKGDCQRHLKKHNGPFFPCTQPGCDMTFYRADKQRDHLKQGHDIIVAAPPRRRH
g960.t1	MSSEVFSCTECDRTFDALGRFNQHLKTHKKPYICKNCGRGFGLRADLHRHIEARHRVGNPRYGCGIQDCNMKISRKDNIASHMKRYHPEKRRDTAPRNRSRVGAKLNSNDEDSISTALESEPHKVFDWWQSASTGNLYALKSILNGEFDVNSQAQDQNTALHCAARTGQTAIIHFLLEENARLDIENEKLETPLYEAALGGHSECVLLLLRAGGSVRMFESDSWNSSVPGFVDHIVRIGDVQLVQAVLAVEKPQLKKDRTSKAHALAIAAAKIGQIPILQSILKSDPDAAEYRGRKAAPIQHAVSRGQMSAVQILLAPSGHCKDPSNKSSRTISRMHCLIRSAAKRGFLAVLEMLLEYEPNATINWGHLVALAAENGHSEVVRYLLVVGKVDLGLHTDP…
g961.t1	MQREQAGGGAGAGAGAGAGAGAGAGAGAGAGAGAGAGAGAGAGAGAGAGGCCKQERGGKRKQKEATGGKRRKQKEMRQRRAGHSTNSTEAARRGGSGSGSGASTTAAMDVTKFVAEYREAAFLLGDYNTYRAQLTRRLRIVQKKLGRATPKNAKYAAKTPVTAEDIAKNIEFLHLLLLTSERAWAHAMAMKALHAEDNADKNITGSTRQHIISRLHKAVQSANEVVALLSDPASAATETDVLEAKAYVYALAGAQDFEKQAEGIKAKGASPHRWDACLTNFAAARVLYSALHKATKKDLFKDVLTGTIDPSIRYAAYQNRIPRTVGVPAVAKKYFPAKDEQLVKAVQHIDATALQEEEATASSSQITWRGRTANIVDAAIGQALVSIEAASANLDQSSA…
g962.t1	MLERASTCLESGGRQLLRAPRPCLPSRRKLHSTFWHHGASDLCLPLWWAISPTSNSGTDQPAASSSDGTPLDFLYPEKSLALLRKLSVRGEIVSEARRRQLQPSTARTFVTIRRVKPMVGIAELETREEVVDPAEAKDAQREMHERLQCSSAHDALAELLRRLEPGKQELAWQLYLALSDKGPSAVTSALRLTLLEYLVADNEPAVPTRVIKIFNAIPETSRTASAYRAAVIACVALRETGTAINLHREAAREGRFVAREDDVVDIGTDVLLRRLVADEQWELALRVFRAYITEHRFSINGQRTLYRIRWGEATLPEIWTEASQLPEIKEHVQSLLLYVRQHKDELISTPRRRAVLYTFVQSFLPHVMDRVLHVRKPNEDNIWDWFTKLFDDLHAHNLP…
g963.t1	MLQAFDLPAIRTTSPPAFDHKTLPSISPEIIGRDISRPSSSSTVASFTQQRPGSHASMQLPALSTLASLASTSAKDNESNGVMGEAQSMKMPSPPSKTSHGLSMTYATAAPATAGGQGNSPPVCQNCTTSTTPLWRRDESGAVLCNACGLFLKLHGRPRPISLKTDVIKSRNRVKTGGPGRKKGEGINGLAAAHPDADGQLGLAQHRRASGKISSGLSDRSQSPISRTGTPNFAHPSNIAPQHMFEQALSSDAVFQSPSMHGFGLRQPSPGSTSSVNGSHLEPPLSYDSLAAQNTALKTRVSEMELINDLFRNRVSELESSEGQARATEHALRAELEATQQREQALKRRIEEIEEESPRHKKMKMSDLVDESRAGSPISSMVE
g964.t1	MLLQEEDSEAFKRWVLPKLETISDADAEVLADYVLALVTAKDTDANIRRNCLESLSDFLQHNTAAFVDEVIDTLKDRAYAPRANADASPPSPAPIPSIVGPSTSEHLAHPSHASNTAPLHAPRGPAASRVSHGKHRLPDRPAGASPAASAQHERPRKRKQHERDTSQSRDGLDLHSSRHTGNDRPAKQATRRGKNGRAGGLNAQAPAFAPMPNMPPFSPAFGHVPPFDPGNPMAFLAMAAALGINLPGMPPMPVFNAQGADTSNVRCADYDTKGFCAAGTVCPYQHGLEYDPDHPAQGVNGGHSNQYGHARRDRGHSGRSRAAFSLPGPTHDRTNTTIVVEQIPEDNFSEDHVRRFFGKFGTLLDVQMQAYKRLAVVKYETHDAARAAYNSPKAIFDNR…
g965.t1	MVNFTTEEIRGLMDNPANIRNMSVIAHVDHGKSTLTDSLVQRAGIISAANAGSARFTDTRADEQERGVTIKSTAISLFAQLQDADDLKDIPTKTEKNEFLINLIDSPGHVDFSSEVTAALRVTDGALVVVDTIEGVCVQTETVLRQALGERIKPVVIINKVDRALLELQVSKEDLYQNFSRVIESVNVVIATYFDKSLGDVQVYPEKGTIAFGSGLHGWAFTIRQFASRYAKKFGVDKNKMMERLWGDSYFNPKTKKWTKVGTHDGQPLERAFNQFILDPIFRIFNAVMNFKTDEIPTLLEKLEIKLTSDEKDLEGKQLLKVVMRKFLPAADALLEMMILHLPSPATAQKYRMETLYEGPHDDVNAIGIRDCDPKGPLMLYVSKMVPTSDKGRFYAFGR…
g966.t1	MRFTTFVAAAAFSSAVFALSAKRDPQDDVASILEALRENNPEDAEAAAAVMNVKLRARAPAPQDDLDSILAALDANNPDDAAAARQGTKPTASKREPQDDVASILAALAENNPEDAEAAKGAIQKRQDDVASILAELAKNNPEDAKAAQSLAKRWIA
g967.t1	MVAIARSFGAARVASRSLTTAAIELHQTAIDFYPAARPQNSLVAARSAFRNNAARNVIQKRGIVAESTAAAMVAAAKIQGAGLATIGLAGAGVGIGTVFGGLIQGVARNPSLRGQLFQYAVLGFAFAEATGLFALMMSFLLLYVA
g968.t1	MSSPNVYPRTSAAGEDKKAAFLSLMSSARSDCLSLSALMYKKLPREIRDVIYCYICLEDRQIPIGPYYHFRKYDLLERDVERTLEADQIKPSSDEQHAETWLFSHVDAQTILPDGRIRTDHDVYPQDDFLMPENHIFNPDYMGENVALETLQVYYKSNSFSVCNVEGGLDSLCTSIKLSSKEMAVDCVPIDYISDLQIRVKCEHFDVQRSSPSDILRSRLEGFAEEERLLRRTVESLARFRSKVRTSTPRELNVEIVLMSDLKSGSEWDSVYLQARIINMLQAMRTCIYELMHEREYTTIRVTHQDDGLMAFPKTYTGLFQLTKEQWNYEKCKQRPNHDWTQDFWILPIEGDELSEDDFRRLGGYYINCKDSFLAERWGTSNVLHDTNSKSPVVEGFAW…
g969.t1	MATIKPIEGRSVHQIQSGQVIVDLQSVCKELVENSIDAGATSIEVRFKNNGLDAIEVQDNGAGIAPADYDTIALKHYTSKLSTYDDLTSLQTFGFRGEALSSLCALSKFHIVTARATDGPRGTRLDFDQSGKLKGTSIVAAKQGTTVVVETLFYNLPVRRKELEKNIKREYNKVLALLNAYACISVGVKFSVTNLMSKGKKTIAFSTNANPSTRVNISNVYGAKTVAALIPLDLDFSMEPSDRPGPTQSARNRSTQEDLGSRKVRIVGHISRPVVGEGRQTPDRQMFFVNSRPCNLPQVAKAFNEVYKSYNTTQSPFIFADIQLDTEAYDVNVSPDKRTIMLHDQMTLLESLKESLAELFAGHDQSVPQAQLLGKQQSTFKPPSMQSRGSTLSVAADDR…
g970.t1	MALNASFVSPTADAKVAHIITQFDTAGLLSTVFNGLTFWKAALALLVGAVLYDQFMYIWQKGSIVGPALKTPFMGPFLDSVNPSFTKYHEKWSSGALSCVSVFHKFVVIASTREMARKIFNSPAFAKPCVVDAAYKLLRPENWVFLDGKAHVDYRKGLNGLFTRQALEQYLPGQEEIYNEYYKRFIELSQVQHKGEHIPFMQEFRLLITAISCRTFVGHYCSEEAVKKIADDYYLITAALELVNFPIILPFTKSWYGKKCADMVLDEFSKCAAKAKVRMAAGGKKECILDFWVANMIESENYRKAVEKGEKVEKPSMLIRWFTDLEISMTLFTFLFASQDATSSAATWLFQIMADRPEYLDKVRQENIDARNGDIHAEISLDALEKLPWTRAVVKEVLR…
g971.t1	MAPSATPSEHESSRVGPHPSYIEIAKPYILQSRIQTCLTSLSMTDAKEDAVRLQGVTWIDAVRRALSLPIRTFNTAVIYYHKFRLLHGDNEYNWADASAAALFTACKIEDTLKKSREILCASWNLKVGPGEALSSDDPRFENHSKQIIGLERLMLESASFDFRNRYPQKLMVKLARAVKFDQHNEAKTAWNLSVDLYRTFAPLKQSTPTLAIACLELAARLHERDAEALVDRGACRYAKWATSRGEVMETLLDLLDLYTHHRSSTSIGPLYPLETFINIRITLNTEASRLSLPRYTPYASEASASPTASSTPKTATNGSKPQPRNGIDTISPNTPDTPGTISPGQPPASAIGVRGQNGTVRFMLDAARARDEAVEVDKYHKIEEEEYEVEVPNDRADDA…
g972.t1	MLQCDQTVLDQLQRANITDFWLPIDEPTLVRFGVKIKIADFLRVQQFVLSDPIYMSNVVLLETSQVHRHLQSGEEHLLDMEHINDGKIFACKRAPRGIIRFQQDRLRLFVQELDILRRLNHRHIIRLVTSYTDMDTFALVLHPVADESLKSMLNRPLSVAELSILRQSFGCLISALVYLHEERQVRHKDIKPDNILLDRDRIYLCDFGISLDWSEIGEATTHGKPFQRTIGYCAPEVISWQSRNDASDIWSMGRVFCDMITVIRGCSLSEMLEHNGGGLYGIYENPEAMKTWLLELKDEDSCSADNLPLAWAQDMIATRPASRPTASTMAARMLAETPDPSLSHTYVAPCCRVHLKDLPSASSRRVIMPRCALSLSNVVTVIDQMHTSEKQFLSARRDV…
g973.t1	MFTHWLWILAVLTNVNSLPTQWRSATVKRGVTDLDKQYDYVVVGAGTAGTTVADRLSEDGTNTVLMIEFGSLALDDSFMPPWNVPAPEFLYNLTSVPQPNVNNRTFPVINGRVVGGASAVNGQLHNRGSRHDYENWSKFAGNEGWDWDSIFPYFKRSSTFHEPTQEMKDFGMTYDLGAWGNSTPIHAAFPPYQYPGQRIQWKGWVEKEGVVVQKEHANGDAHGVFWVPTAMNPETGYNRSFAGIGHWLEVNFEQVEGLQKAVSVVVQPRYGDNTTFLVKAEREVILSAAATRTPQLLQLSGIGPHDVLQGAGVDVVVDLPGVGWNLQDHSFSMSQYNFTKDIWPNPAQINTNASFRNEAIAEYKENNTGPYAAYIVCSGIFLPGPAFLGNLTTSLVQQV…
g974.t1	MNDIPPYPLYNRTYNLYRLSPLHHGETPLLAGRTLRTHAKRLKEQLKGDNVRGVQVDFASAEDTAKLGPLEECSWALLGDEDSWIDHHRQLQDPEASQSSQPSPPTEARGIEVSLEYEKQSYNALLLRDSTNAVAPDGFSALPLLLVKMPGPVREVFLQYLRTTFDAYVAPLKLPSTFITASMETYFKHLSASASTQSIQDVVRQLNIQLAFPDTTTLVKHIDVTIAAADVPGFVTRGKHARDNPFTAALSSYLAKHLALDVSHPKVQVSRISCNSFHLGTERLKLAAPDTLADTSFSDEGGASQDASAGQLAVEEFLTSLAREAAGSGKFLPDDLSTGPVDSTSSSTTSAKAGRRKRTTSTATTANGNNKKRSKAKSKETDEDTDGI
g975.t1	MSVVGIDMGTLNSVIAVARNRGVDVIANEVSNRATPSLVGFGPKSRYIGEAAKNQEISNLKNTVSSFVRLAGRSLNDPDVQVEQDFVSAPLVDINGQVGAEVSYLGKKEQFTATQITAMYLTRMRATASTELKLPVNDVVLSCPVWYTDAQRRALLDAAQIAGLNCLRLINDNTAVALGYGITKLDLPTAEEKPKRVCFVNIGHSNYTATVVEFKKGELAVKSSAWDRHFGGRYIDKALVEHFAKEFDEKYKINVMENGKARFRLAAGVEKLKKVLSANNMAPINVESIMNDVDVRGMLKREELEELIKPLLERATAPIEQALAEAKLKPEDIDHVEMVGGCTRVPSLKAAIQEYFGGKTLSFTLNQDEAVARGCAFSCAILSPVFRVRDFSIHDMVNY…
g976.t1	MAPYVLTPTSEQDHMMDGREYHPIDGSSSGGEATPTSSASGAEAFNNGPTVTATVSTDNHLNAQEVTTDDLDLASSLPSMKYEDAYTHGYKDGYTCAHVELKHQPIAIIGMSCRLPGSVSTPDEFWELLARSRTGFSKIPSSRFSDKRFFHSNPGKSGATNARGGNFLTQDLAAFDAPFFGFTQQEAISLDPQQRLLLECTFEALESAGIPKHNVVGTDVGVFVGGTFSEYEADLFRDPDTIPMHQATGCAMAMQSNRISHFFDLRGPSYTVDTACSSSLVALHNACQSLRTGESSMALAAGVHLNMLPEFWISYSMSRLFGEEGRSFAFDQRGTGYGRGEGCGMVLLKPLDQAIKDNDPIRAVITGTGINQDGKTPGITMPNGAAQEALIRSVYSNGG…
g977.t1	MKFLCLPGAYGSIEKFKVQLAPLVKELESDKSATFHFIQGPYEVAPPAGYEDYFGGPPYHRFIVPSDADVDATDVIERIRDFPQLETPEMTMRELMTYGVAKTDDSARHTLDFLYEIMEKEGPFDGIMGYSEGATIAGTLLLHEQMREELEGRLPMFKCALFFGGWPPMTPTLDGLVLADDSDLMIEIPTTHIIGSLDPYLHGNIALYNVCDPDTAFIFDHAKGHTLPRDKHMVKELGDTVRRMIEEVRGTASPS
g978.t1	MVTEENLAKLVRSFSTMSIAPEEDMAAAFMSIINKYVLYIVYLFIGRICLAYIAVIGFRVTSLHISANIRLHYLQELFRLPISTLDALPPGQTTAIITVTANTLQLGISERLSSLIQAIAVILIALVIGCCFSWKLTLVTSSGLIVVSTWYSILTPFVAKRYASVQKIEREAAGFAADALSSIKMIAACGAEEKVAQSYGNLINEMRALSQKLSPILALQYAPVFFTIYATFALCFWFAVELYLKLQFSNVETLVVVLMSVMTMLAHISSVSVPLTAATNAIAAASVFFTIIDAPKPVTSGIKEGTVDMNADIVMENINFAYPTRHDVKILDGLSLRILAGKKTAIVGPSGSGKSTTVALIQRWYELGETDPIASYLRNGVIKIGQSELRSIDLFWWRS…
g979.t1	MWSFLFTALMLSQLPLSFANVPNCPIFGAEFPPPQRLAQHPKWQQALANLSTAFDYMDANITGNNLSYSVQIFSTNPGNTILAERHRTAGNLLPDTEGVKQVNANTVYRLGSISKIFTVLAFLAEVGDIHWNQPITNYIPELAQYSRLVSAQLFDDDVRRTDWEDITIGALAAQVSGIGRDYGVLGEITQTENITMQWKSSFPTLRGPSVPPCGAWPLCTKAEFFAGIELMFPSYLPWQTASYSNVGYQLLSYALENITGKNFVDILDERVIKPLGLKNTYLENAPPSVGIIPTTTKDDYWWVNLGGANPGGNMYSSAQDVSILGHAILSSRLMKPSLTRRWLNPVTFSSDFAAAIGAPWGVRRIQLDPTSQPYRSLSVFTKAGTFRKYTAFLSLLKEF…
g980.t1	MKSILALAFGLLAVTAGQVTFQNSSQTILRTDSGSYGPEIEEVHYYYEQWPIGIAVSSTGRIFASYTRGNYTFTLGETVNKTTERPYPSASLNLPVSQLNTTWNGIMFGSGNSTGLISVQAVYITPASSQRPETLWVVDTGRPTIMDSSGAPTMPYAQPGGPKIIGINLANDTVYATYTFPSSVHFPDSYMNDIRFDLRTNATHSGQGVAYIVDSSDEGRPGFIMLDLGTGESWRRLTQHPSVLRVDRDVPSYQGRPFYQKTIGIPIQTLREGLDGLQLSPDGSRLYYSALTTNYLYSIPTANLLASPTDPLVEIAAASNVTNHGQRGGNANGFEGDSNGLIYQLMPEHNAIYYYNPEDLQTHPFVRDPRIIWPDGASIAADGYIYMNINQLPYQPMWN…
g981.t1	MMPSAIAIKKIDGKPGKVYYPLEKITIPEPSPRENEAVITLTAAALNHRDLFIRQHLYPGTTFGVPLLADGVGIVTSSGAGAKPWLNARVLLNPGTGWTSSPDGPEAPKGYAILGGTKSNPAGTLAESIVLDKGELEVCPPHLSDDEAAALPLTGLTAWRAFRVKCGDNAQRGRNLLVTGIGGGVALMVLLFGVAEGCNVFVTSSDQAKIDKAVRLGAKGGVSYREKDWDKKLQSLLPAHRNYLDAIVDGAGGDVVSKGSRLLKPGGIISIYGMTLSPKMDFLMSAVLRNIEVRGSTMGSRTEFADMVAFVREKQLRPVVSRSVHGLDIEKIDGLFEDMRSARQFGKLVVTLGEQRRASKL
g982.t1	MSDDHLDKNTTSLHEDLKSDNTHTVAEHGHTATDVYGNALLTFDPKAEAKLRWKIDCYIIPTVALLYLFCFIDRANIGNARLAGLEKDLGLKGYDYNQVLSIFYISYIIFEIPSNICCKWMGPGWFIPVTSLCFGIASIGTAFVHDIHSICGVRFVLGIFEAGMLQKPGIAFYMSRFYRRSELAFRLSLYIVMAPLAGAFGGLLASAILTLDHFGSLHRWRMIFAIEGIVTCLLALISFFTLTDRPETARWLTQEEKDLAVARVKSERVGQHEVIDKLDRKKTFRGIFNPVILATSAIFLLDNITVQGLAFFAPTIVRTIYPKNTVVYQQLRTVPPYIVGAFFTLLFPFLSWRYDRRTIFMVAGAPLMMVGYIMFLASSEPQVRYGATFIIASGAFSFG…
g983.t1	MTSFTISDSDLDQIKDQVVLITGASSGIDLATLRRIVQHGGEVYASDLNPLPEPNAASVPVSKVDVTDWKQQVELSRPDALSSSPLAPPTAHPHQRHRALLDRHRYPIPRGTLRDKRQPATRRRTSPLRHPTHGRCDAARRASVQRARKLHGSGERRQGVPPADSEDDLTQLQVMKDLMCAVESGE
g984.t1	MLPLGLLTAATGHPMLVELKSGETLNGLLVNCDTWMNLTLREVVQTSADGDKFMRLPEIYVRGSTIKYLRVPDEIIELVKDQQVKDQAQRGARGGMHSRGDHRGDRGGRGTRGRGRGRGRGGGGPNNA
g985.t1	MLKNGDDGSHVSPVAASAVSCGGGTTSTSTSTSTSTSSSSSSNMRSFKAKVLSAVACLAPALAAALPGHAEVARPHHEPLQLDFQQNYAQATFRVPCPGCLGQDHTDQDDESLTLNFTAHTHAHACGSSNITINGVPLPQQWEGDYASGSGSYQYTSPAALQHDRLPQRDLALAWNSTCLHGDAEADAPAQILTVNIRSIDGVPVNTPSGFTISFKQNSSPPSLLRLDTQPDPAPELSDIWRDPPAHLRLVFGDSADANPYLQDEIRELRALQAELEAIQQAVASKKQHIHAQIRKETRCFAEEWKHCHGLSCILKTVAGRAHGAWRVVYLRLHPDDQDKNMGRPEAYASAHVGSQRYGSITADSRVEYPDSEPRPYEGSTGELPPRPQQRPAPYMIAL…
g986.t1	MSRWTLYSLAQLRPPNVATRTFFQQKWTAKADTRAYHGEQIREKKWARLFKRSLPAVVPMDHRYLARHDGSEQAAGRGQGADSDKKARAPPMTPYMQMAYHPIERRLDTAVFRALFASSVRQARQFCVHGLVRVNGKKMPFPGYMLNPGDMFQVEPGSVMFATGARKDRSSTARRVAKEKAAARAAARAEAAAHTPRQPPADAVVPSKRDEPTPAELKAHLQTIMADVDGVLAEDVGAKDKQKFRAFRQTVKRAIGLWRSASPESISTLDAQFDFLKTQLAARSAPPPAAATPDPAEEPLFSDADQAKLRQAFDKLRLETEHTSAWNRRNAAAPYATPWRPRDYMSAFAFIPRYLEVNQNICAAVYLRHPVARPGLAEVPTPFPIETGQLAFNWYLRRR
g987.t1	MADGRRTSFLSEWNLGFFLMAAMGVVAVGGGDGGDEVVAGRGLRRTSAPAMHGRPKSRALRKFPTRALARATPAPSTPSTPAPSTPSTPSPPSPHHRRALLPNSPWTAQFPPPRPRHTPAMADTAAAAAAEVKPAEAPKTATEGEEILRLNGSDAKPDRRDRRDDRDRDHRGGRGARGGRGRGGPRGGGGFKNRKARNNEFEDLPETDDPVEIRNQVEFYFSTHNLVTDEHLFKELDGPKNRPVSIKHIADFKRMRRFQPYSAIVAALRESKDLLVVDDGDFSGPGNEAVKRKEPLSVPTKDDDEKNPPSTSDLFFRLQRASSNDLGRSAYVKGFGDPEAGQIALEQFFRPFGAVMVRKRREADGTFKGSVFVEFDTEDSQKQFLALDPAPKFNDNALT…
g988.t1	MHGVVQELDASQKGVCVRESLLPEEQTIKAQRSRSESASGTEFNKQAPLSQTWLWWKLEILSWCGSFCCFVAIVVVMRSFEGQPLPHLQFGIAPNAVIGVLATLTELLLVVPVRTGIGQVKWLQAVRKRPMDDFRSIDEASRGPWGSILLLTQRKGGLTGSFSAVVIILALGMATFTQQALSYHVVFPQSNDAQMPVANIMNGTGWAQLADGTNVYGIDPQMLSAPYVGLFSRPDTAFTAKTHCATSNCTWEPYETLGVCNTCVDLTSKLRKIKATAEMILVGQDREEKKAYYTTNHYALPNNFTLMGKQSGEIYSASVLQSNGLLNLSTTLSGPKGGSNIYAEKPGQTWASVAFANNGSKLFSVLGVGPLNGSFIEQPDSNFTTKDTGNVNAPPVAFQ…
g989.t1	MIDYPPQDDWHGYNPVFVHITDALKTPEEYGSEHSHGPLIDTLSGDFTITKKDLVWRIESNGRHIDGNLIVKLVHTLQSKDKESFCVSDLLTLPIRLCPHQSTTFDLPERSRYIKGIELNGSLLIHAIKYAFPVAAQTSVNMNSLKQPSPSEQEQISRAQSGETVY
g990.t1	MARPRRVLAPPPPPVFSLAVSQPSSQVFCSSCRTYLPSANFRRNRIGGVYQPCSNCSATSRAGRRRRRLSTPPRPSSPQRDRLTASQPAPSASAPEQASRREGSASNTPNNPAAAAPAAAPSSQYSDKPFNDLPETVLVGLQQDTTPLLRRRPDGVYYDIGSMQVPCSACGALHWIDKRKSTTSVTDPRFTLCCLDGKVDLPALTPLPSYLYQLLNTNTLAARHFRKELRAYNAAFAFTSVDCTPTSRGAQGPGVQVFQIHGALYHRSGPVEVLKGSLPQYAQLYFYDPQYAANARHQRNSHLQLQILQDLTAMLYEINNPYISIYRTAQDQLNSSAADARVILTSRLTLALETRQDRRRENVPTSDELGLVIPDAAGAETSRPIVLAARNSSALFTIS…
g991.t1	MLFSTITWALFACGLGVSAASNSNESSPIVPSKPGLEYFNPLSTPQLKLAFTAKIDWDLNNNHTIETPSGIQTSFWSREGYWYDTKGQLIGEILRANDDGIVPPGTNYLELVIYYVVRLEDGYWAYVKHTGVAVIRKSQNGVVRVQTASPKYDWLNMIDFVAPGTFNGTEIMTVQHYFPNSKLPGN
g992.t1	MSNTMLEGGCCCGAVRIKSTGDIQVKALCHCLNCRKITGSAYSTNVIVPGEGFSVTKGTPKSFPKKAVSGKVITSNFCGDCGSTLWRQSDSFGDNRIIKVGVIDGSAIEDAKPAVELFVANRVSWVSPVAGAEQKKYQ
g993.t1	MLKSRQALNIKAKSNRSLSTPLPATAIEKDDSGSPSNTDPSSEAKNKDSTQPQQDAAPPNGGYGWVCTFCVALINAHTWGLNSSYGVFLAHYLRTETYPGATYLEYAFVGGLSISLAMLISPMATLLTRKYGTRLTLVAGAVLQSAGLIGASFATSIWQLFLSQGVAFGFGMGLLFVASVGIPPQWFTTKRSLANGIASSGSGFGGLLYSLAVGAMIKSIGLAWCFRVLGILAFSVNTICALLIRDRNKIIGSRQKTLDVKLIIRPEFILLCAYGFFSMLGYIALVFSLADYARSIGLNNSQASLISALLNLGQGIGRPPVGYFSDGFGRINMAGSATFLCGLFALVIWCFAKSFGVLMFFALIGGTVAGTFWATVGPVTVEVVGLQDLPSALNLEWLV…
g994.t1	MVQASFLFLLTDVDSLYATNPKHDPHAESIAFVTSVSSLRKNIDSDLGAGTPNGTGGMETKLRAAEIASAAGFFTVIASSAKPGIVTEILEYYKTQRLLSGGTEFKSLPDDSSESEDDARPPHTIFLPNTNAQFAPPFAVGEALTPSSL
g995.t1	MSKFFNSSFNSTETMPGAEANLGFIHAAKDLNILYASAAVTITAVILAGFQAGRKLLLRIYWFFDQLIGGAAHTVDLPGPPGVPMFGNLLELRTGHVKKIAEWTKQYGDVIRVSLGEREAVFISSHKALAQTVVQQGPSYQSRPTFKLFHNDYASNGIWTVGTSPYSDRLARTRKALGSQIAPRLLPVYTPVIHPKLKKLFSVILELSNGPAIDMAKKLHRFGTGQVSEQLMGTPLDDDVVGMLAENETNIFRQRTIGSPVRDYIPALRAVGLLRYAAGKSLGIKGWTYDEKEEKAREYRQKQQGYIGKMIKDLRQRVDDGDQTPSILGNIMRQSLLKDEEVLLASYTGIAAGVNLGYSLTWIIGYLAGRPDLQKSGYDAIREVYNGEPPEPHDFDRVE…
g996.t1	MAYNPLYLPQQPHNNAQIAPLGSYFQHPSRQLADQTQYWAPPPPLPPPPATSITINNTINNVVDYDDSFRFAVPAQSYGWAGQSNLYNGQ
g997.t1	MAKTKKDKAALWLERTGWLPYLNKLDYPKLLASIKEPNIDLEKDKEPVKAAIWSVIDGLAYVSQTSVIKQTGIFVRIEAICTKKHQTRTQRKHCWNSPKYRFTQQQREAWEALIEQAERDVGGAEMEVADKDQDEDEEEEEEEDEIMIDELDDEQDPSECDNKPKNKPKNEPKHAKLTLIKKACLMFCITLLNQRICYKEYNCALVCALAVLGVKEDGWKDAELLKVHFNTTAQGNVKWIGRDKLLYKNVHFTIAQFRSMVHGIQAENKQMLVKKLLFCNGQTADQVPQIPWEQLRDNPTNNRPGWNFLKDQRTRMPVDRESWLFEQVGQDATMRERFIKPATRSRIDRNEVEQYIDCVVAFREKLLALIHMTAGQPAQATEILSVQHSNTIKGGHRNI…
g998.t1	MAKAWANVEMRTQNTIQEGEKDEVNLWLERTQWLPYLVGMERPELMACIEEPVAEPDPRQEQQAEPVEAAMWAAMEGLARFSQASVIHRIGVFVQLEAIWTEKHQTRFQPLQPYMDEKSISNHTRPWQQILMFFAQTQQEHAWKSPAYRFTRQQREAWEALVEAAERSVEGEEEEEEEEEEEVEDEDEEDKTMADVDEAIDEMETDTAEPTTNAISEPERLLSIQKACLEFCIALLSQLITRKEYDSLLVCALAVLGVKENR
g999.t1	MDELLFGNSKVAEPIPSVPWDGLRDNLTDEQPRWNFLKDHRTRMPVDRERWLFQRVGQDAAIRDRFMQRGTCSGINTQEVERYIDRVVAFREKLIVLMHMAGGQPARALEIISIRHSNTVKGGHRNIFIKDGIVVFVTRYHKGYSVSGDVKIIYQYLPRKVGELLVYYMWLVLPFQQQLEVMVWEKERESRIGLGLELTIPAYREIAISISRRFLRGSTAFRADEGDENEEWNEENTWSAIADMQAGHMVHIAGMIYARGIIEQAGAVADKRQQFRVDDDDGCKKRKRAPFESEADEARIDRWGRLRKMDTAAQMQQIMGKAAKFRGVQKEAINAIVAGKSHVVAVMPTRAGKSMLFMLLAWAKQGGTTVVVVPLIALRGDMMRQCRKLGISCAKWDSC…
g1000.t1	MGWSTTLCEAAEQFNRGARSFPFASELSIVDKYGYNPPNKDYAKLFSCQATVLSLKRRSSHHRPHSAGWLVLTEDTDSVCKPVFVAYSLLSAIWLLHESLPEGALSDEAWNRLVCAAQSLAEGTGEAPPSAQKPSAPSADCRKRPTPSLCVLSPKRARTEPAETPLSSPQQSEHGEQFAQRTTSITNNNCRAEQARTRKLDDARCKNRLSLGLREPGSKASSAERAAYTSISRQDKALVAWIIKQPVAEHADFYSTAQAPYAKACELLEKARVLGNPSSRHHAAQFLQTWRERGSPFSGGVAVRHNVLRYSQRGRNVPLVQSAYPRTTDGEFCLAWDRCRRYAGVLAAVNIEYRWAEALLGKAYADKILQIQEGDQASSSSRSRSRNGKGQVRTEAIAA…
g1001.t1	MVASVNPKTQEEREGVEQSLLGGKDSDLEGLAGVTSEHCWFPSNELCQPPRDRKRDQQEAVQCTPDRQNNNQILWLWKIKQVVGEDKEEAEAEAESERQPTKGGDNNSESEEEMDEEEEALLEGYVLGLLLLLLDYHLKDNEYKSAFVSATAVMGIDSDCGWKDVLAYTPIISAVVTVVRMLVLYMAVKTRQDRVAELIEKEGFAQQDAEELAVSHFDLV
g1002.t1	MHWLAALDSAAERFDGGRRSFPLASEADFVRNYAYEPPNEDYEKLFFCRATISRSQRDPGARPHSAGWLIPTRDDASVCKPVFIAHSVLSAIWLLRETLADDVLPDNIWDRLVCAAESLAEDGMEEPPSAQKPFASPSQQASAPPPQQKKRPHLSAPAPTPKRARTTTDETHPASPQLSQPSEPDEQLKDSPLHITTISNNNRRAEQKRSRTLATSRAKKRLALGLVAPGDKAPLPEQAAYTSIVQKDESVVAWIIKQPVSDDTDFYSSTQTPYLTACTLLEKARVLGNQSSRYHAAQFLQAWRERGSPFRGGGELAGSQSRTGAGAKRLQLLSVRNDADRDFCFAWNMCTRYEAELAAVHIESRWASALLGQAYSNKIAQIRHNNFVSSNDRTRNRYG…
g1003.t1	MELFAQLFEHQPELRVVVCKPCATAIPPAQIVTHLKERHPKVTVATRKSLAAAVRALPNLAWSPGDVRVPRPAKEPVFGLKSREDGLVCLSERCWYTCISLQGMQKHCKDEHGWVNEQKRGGDMRQKSKHSRNRVWRDSQSCQRLFRAVGWPAYVAVETSVGAATLADISQRVKADRQHQREEREAAAAQDKIKEGIRSQADPWLELTEWVPHLQGIPRAALLRAKQLAGGEVDARGKEEVAFDDTGLRDVCKAMERLIRKAFDSSRAEVVGRLALEIIERREAGAESNERPFYARHRVGTIKKYSQKLVSILCYLWRTYDQVERPPYKLTSTQDALLVSLQQIARSDDAAKKEKLEERCLRFWIALLNHSLTGDEHESALLSGVAVLGLKPDHHGGGW…
g1004.t1	MRACYVTKEGRVEKALGYKLERPAKEFMTVESCRRIAIDKHMDGRQNRQQCEIGESKCDLCERHPGSTKQQAVEEEQEEPEETQADTAAVAAEEQRRCIERAIVVEERRVEIQQQRRTEQKVYDLERLEQHFQRWSNACAICMATQADPARHD
g1005.t1	MNTALGTRAWRHAYLAIHRELARDGQARDWLEVLYWNKAPAKSNAQALQSGHSLETEEGNYGRSMMESPFQTMAEREEFRRVSMDWHRVLEFASAWEDGRMHPGVRAEMVAQQEKQALQRWSSLAMVDLKAEFRRLAGRPDAEYRGKQEESLKAVMQRRLRVLVIMATGTGKSMLFMLPASVSPGGVSVVVAPLNALRDDLQDRCDQLGIPCAKWDGRRPPYWARIVLVTPKSAVTKAFSRFINEKRMLHQLDRIVIDECHVLLESTQDWRPDLLKMVEMTEKGTQVVYLTATLPPTLQPAFLHTAGLDAQTVTICRDERTTRTNIAYQVLEYTRGTLEKVLIKLVAAKRSRYGPKAQIIVYCPTVDETKRLAKLLQCSAYYRQMGSDEEKARMVRSFT…
g1006.t1	MQKHCKDEHGWVNEQKRGGDIRQKSKHSRNRVWRDSQSCQRLFRAVGWPAYVAVETSVGAATLADISQRVKADRQHQREEREAAAAQDKIKEGIRSQADPWLELTEWVPHLQGIPRAALLRAKQLAGGEVDARGKEEVAFDDTGLRDVCKAIERLIQKAFDSSRAEVVGRLALEIIERREAGAESNERPFYARHRVGTIKKYSQKLVSILCYLWRTYDQVERPPYKLTSTQDALLVSLQQIARSDDAAKKEKLEEQCLRFWIALLNHSLTGDEHESALLSGVAVLGLKPDHHGGGWVPAHEFSPTLSALITTSKALVVHHACCQRDKALQKDPCTAPTAYELVKDMSERFMTLSDFKGTPSPMNRMLRLRTLARTQAKRRNTPGIVSWDGDRLLIDKQS…
g1007.t1	MHWLAALDSAAERFDGGRRSFPLASEADFVRNYAYEPPNEDYEKLFFCQATISRSQRDPGARPHSAGWLIPTRDDASVCKPVFIAHSVLSAIWLLRETLADDVLPDNIWDRLVCAAESLAEDGMEEPPEPDEQLKDSPLHITTISNNNRRAEQKRSRTLATSRAKKRLALGLVAPGNKAPLPEQAAYTSIVQKDDSTQTPYLTACTLLEKARVLGNQSSRYHAAQFLQAWRERGSPFRGGSELAGSQSRTGAGAKRLQLLSVRNNADRDFCFAWNMCTRYEAELAAIWHNDFVSSNDRTRNRYGKGQIRTEAVAALVELVSPNATEKDKQVFRRRLGQAMRWYSISQELGWGILTLIPHDEIANRWIERTLRVGQLHVWIELLKKECPDICAASKALEN…
g1008.t1	MRPRDKGEFIALIGLPAKEQCQWFRGPTTRKNVKYQIQRYDQKEEDKDKVLVQLVEEKKRQYLMPGQIIVYCDTVAKTVRLARLLGCVCYHRQVGSRGEKAELVRQLTEGRQQVFTATNALGLGVDAPTI
g1009.t1	MNYVNRREIGSETNKKPFNARQTGKTMTKYAKTVEAQETEANKEEDRGEGEDRGEGENREASQILWLWKIKQVVGEDEEEAEAEAESERQPIKGGDNNSESEEEMDEEEEALLEGHVLGLLLLLLDYHLKDNEYKSAFVSATAVMGIDSDCGWKDALAYTPIISAVVTVVRMLVLYMAVKTRQDCVAELMEKEGFAQQDAEELAVSHFDLVQESANRFMTLTSYSGTPSLMDWLLRLRTYGMKIRFNTNVDGVIKLVETTRFELQKQLMLLDINKDGRLAEGATPLPAIDWDSIVDNPAEMKVGWNFFQDKRNTFRGVDRKN
g1010.t1	MDQFNTIFVHIPSCRIVVCKECGIGVVKAYVATHLNSKHAYVTVSTRTDIAQAVWAMNDLAENEDEVVYPEPGSDPIPHLRIWQDGFKCEAKENDTTTNLQKRGRTSKGSRRETNWRLFKVRRQDREDTGGESVIIQRQLEAVFQETTAVLDEVDKNANARIDPDHNRHVTHAWLNWTS
g1011.t1	MGWSTTLCKAAEQFDRGARSFPFASELSIVDKYGYNLPNKDYAKLFSCQATVPSSKRRSSHHRPHSAGWLVPTKDTDSVCKPVFVAYSLLSAIWLLHESLPEGALSDEAWNRLVCAAQSLAEGTGEAPPSAQKPSASSADRRKRPTPSLCVLSPKRARTEPAETPLSSPQRSEHGEQFAQRTTSITNNNRRAEQARTRKLDNARRKNRLSLGLREPGSKASSAERAAYASISRQDKALVAWIIKQPVAEHADFYSTAQAPYAKACELLEKARVLGNPSSRHHAAQFLQTWRERGSPFGGGVAVRHDVLRYLQRGRDVPPVQSAYPRTTDGEFCLAWDRCRRYAGVLAAVNIEYRWAEALLGKAYADKILQIQEGDQASSSSRSRSRNGKGQVRTEAIAA…
g1012.t1	MLQDRNIFVANGQIITVVRYHKSQSQWDKPKIVPRFLLLQLRQIIVLYLAYIQPFRKYLTLQVLGGGYSDYVWHNAQGAWNTNQLTRVLKQETQKRLGVTLHTLDYRHTAVGLGQVYVGESFSKGYQDDIGEVDKAEVEDNSEDIIKLQNSRTTAMGVGNYSVPINIIKHLSMRSIDAFRPLSAAWHKFLGVNGTGEVRRTAVASSTQRKRPMRASMSGLALLPQDKEVRVEDLRKDKIRTALQQVLGTQEVGFRLVEQEQAMHAVLNGQNLLVVVLPTGGGKSLLFTVPAVVEQTGVTVVVVPYQALINNLVERI
g1013.t1	MANKEQRIIRVREGRFDCNSEETASSKEDSEEDSEDGEDGEESEDESDAPRPPRRSRRPTLTRAKVSQDKIKDARKLFTWTVEQKAYAIRLWDALNGSERATQMDALLKSISSFIFTKYHPKALSTGLMQFLAVLGINPDTGRLRTAKHYSYMLAGMVYCVQVIRAKKLLPGGQRNTQTEQDRNCFIKMRHKYLADGTFTLISAIISMLAYRKHVALIASNLGNAYWSADKQIFYLTSQQIKVSRFCKMAQDLATETSEML
g1014.t1	MLYSAHTAQAGWFRTRRVSRPRNSLPRSTKRAAASSSALLSKRLRLATKPPSPTTPQLSELNKSNGLEEPELEEPVRGQVGQEEPAQITSVSNKNCRAKRERAKKLELMRAQKKQDLRLVPPPKLASCKEHSAYASILRPDEPFISWILKQLAIAFLSKAYTKKIDQIQTQDAARLNNKGNNQYGKGKVSSKAIDALLLSVTAALGP
g1015.t1	MKISANFICAAFAAGLVPKTMGSALPLPKSIPWETTTHNILLSEIGPFNLTPQSGASNPSSGALDKRSGYSARVCKDISAQFTPQTGGVWHFREARCDRSGTDINTFRVECFGGRNWIEHLPQRKGQCGPREWCVDYHGRNAKGDQANDVFCVNRKDIHTWVANTQTRQEDVVTCSAGWTNDYKQTAYASLEVDVMDSAGINAIAPRSIFYKLNQKLIGISRGNDPFVGSGTIAMPPGSTIQACVTAYAAQSQILNILGAMVAFSLVKT
g1016.t1	MVTSPSFDPWRESPSNKSTLSVQSSPLGRDPVDAQQTRSPAIPSCADLTDTPPPRPQFERAISSPRLSSHPEAPRYSTSVDIDSDTFTDTSLLYSNIQRAGPQFNASGPTDQSRRSPSSTNVYDINGTLELCSRRRRTNVRDKSPCARIAARRSRIQPNIESYYDYIMPDQVNDGTGVDTNTVNPNPGALPSRFLARTIAAMQNLQISSPSSTSDVAPSTPERYEVHFEYPVVTFIHSPVSSTSNVPAVCVRACGTPPPPSRKPPARSPDERVKMPDHYPACER
g1017.t1	MSKRSAKASASSARAASTFGSAPAFGGSFGGSASQLSYVAEPPNLSAISDPNVVVFFRNLSKKDSTTKAKALEDLQTHIVALQAPVEEGVLDAWITVYPRTSIDNAKAVRQLSHTVHGLMAVSAGKRIARHMSRSVAAWLCGLYDGDRAVVEATQNALRQVFATPEKIQNIRKAYQQPILEYCRDAVDKESPTTLSDERTVSADDAQAKYSRVMSACIALLASLLANLAPEELSKFQADYDTLLSDKKLWDFASHVDVSIRRSLHRLLKTCLTKQPDAASANLETISKAYLSVALNSDQTGSAYDFLEALIQLTTAHPTAWTEHYKSKTSVDRRLRQFLKKGSQFGPQDYWNRLVDLFKALPGEVLPCQAPDAVDLLSALQAGIAGKNEPKYNQDAAYT…
g1018.t1	MCDLKRTLDQGGHCVLEMPSGTGKTVSLLSLIIAYQQFYPEKRKLIYCSRTMSEIEKALAELKALMKYRTQELGYEEEFRGLGLTSRKNLCLHPSVKREKSGGVVDARCRSLTAGFVKEKKERGEDVELCVYHENLDLLEPHNLIPPGVFTFDGLLKYGEQQKQCPYFTARRMMPYCNVIIYSYHYLLDPKIADRVSKELSKDCIVVFDEAHNIDNVCIESLSIDLTEDVLRKATKGVNNLDRKITEMKTTDAEKLQSEYAKLVEGLRTAEEARTEDAFMANPALPDDLLTEAVPGNIRRAEHFVAFLKRFIEYLKIRMRVVQVISETPPSFLESLKNASFIERKPLRFCAERLTSLVRTLELTNIEDYQPLQDVATFATLIATYGTGFLLIIEPFESA…
g1019.t1	MNWIHRDIKPDNFLITSSGHLKISDFGLAFDGHWTHNQTYYNEHRYGLLQDLDLEVQGDEQDVEEEKERHAARSTTDAINGNITARQQHGMKQDVTNGPILDWLNRTQRRQFAKSVVGTSQYMAPEVIRGENYDGRCDWWSVGIILYECLYGCTPFFQENRQLTKARIIAHKRYLKFPNEQRFARPTIDRVPLMPVSRNAIELIMRLLDERQDRLSTKRYRENDWVLRDKAVGARRYRNLNATGHIVFTNDAEDIKAHPFFRNIQWSTLHLTRPPFVPRVRGGQPITKYFDDEAEIMSASDHLDSSSYESVQIDGATLVDGVEPLGEGEPTPTAYSAAQQESRSLLAYEQICQGFQKLRRRKKEKKRPRDKLLRDPEMGRVVLEIRKKGAFIGYTYRRP…
g1020.t1	MMSMVTTRKRKDVDVAKSSSDEKSKVRLVEHSYDGLLDGTGKPQRGVRTLNNIRRGGVKIMSMFRSTKGAYPQDQACTSSHWSLGSVLDANAAVVACKTSSDTTDDTQRPDAPRSQDLHTVRSPSMHSILNTAPKLTLRLSESSLTQLTNPAVFDGESEPTTGSRSFEHAVIHTSRSTPGLSKQLALKLSNALAPNSTVIYRPKPSSRPTILTKEHRADLPNIKTPPPDRMDDVSPLPSQFSSGPESSNGPLSQSTAPTSIVSSGGPVSAEITHRAGNESTHAPLLSSHVEQQVTDHCALHWLEFPRQDAPRLIKPSVATVEKAAAAKIYFEAHFNQLLATQVSPRSMRRRQLERKIFAMALPIEQRQYKRQRWYLAESQHLRQTRVMKSKTIARQNIK…
g1021.t1	MAPNSPTAPFPLYLLPRIPFRRRRSSAQSTSTISTSPPTCPSSSPPALSSFLTTTPTTNLRCTKCLADLIPTASIVSKGFTGRHGRAYLVAPPPPSSLQHPPSASSSGDVPWHPRDLPNTFTHKPVARQLVTGAHTVSDISCRCCGSILGWKYVHAEEETQRYKIGKFILETQRVVKNASAWEEACQDGRVDGEDSVLGDLEAAQASAEVEFDSQDEDECEDLFSGIWSPELARKRRRNRTFRPQ
g1022.t1	MDSRLEKKLDSVRKRIAAHTFDGEDGEEYGGSAFGGFTDYFRRKRIKLQNLDAATRAQAGDKPRLFRGLVAHVNGYTQPSLNDLHTLIVQHGGGFLQYLDGKTAVTHIIASSLTPKKVVEFRQYRIVKPAWVVDSIAAGKLLPWNHYRVVDEGETQKVLAFDKGSVVSTANSKQRGYRDQTDNSWYTGQLRASQTTPPAALQATNRSRFARQKLPTPDDDADEIEDLPPSHQPEESSSSQVRKAKEQGKTLVSPPKTSPTIAPEPSPDEFGNIDDIADELHDSLYADPTPARPLPRKKRQSTPPQDRIHAAEIAANPRKTELTAEEHNAILLRDPRIRKSTVVDPNFLEQYYRESRLHHLSTWKADLKAQLQAMASEKTATQKAKQKRPPGARRYILHV…
g1023.t1	MPSAVPAGVYGRRIPVGGLPIPAAVDPSAAFRITMAAIDPSAEPQIDEEHKVPRATLRIIRVPMDLDDEDDEDDEDDEDFDGEDVESIIAKLRAGGVALPEEDEDSEDDSEDEANGGPSDKSKSKKAKEAALKKKIAQELAEDKMEIDAVNGKGKGKISAEEDSDEDDLDDEDEDEDEVEEFVLCTLDPERNFQQTLDITVREGEEVYLQVDGTHDVFVTGNYIAFPEDDDEDDEDEDEYDEEYDLSPDEDELDLDEMDESEEDELDGLANPRVTEVDSEEEAPKLVESKKNKNKNKRAAEEEASLDDLMSKAATNGEQKAAKKVKKNDGQAVAAAKEPAKKAEKVEKVETPSSDKKKVQFSKNLEMGPTGSPRVDEKKEAAKPAAKGPRNVSGVTVED…
g1024.t1	MLQGIPSPPSSPPLAASNTLRSKARRGGAAYTITVECERLFCETLRSVFLGEGNQRRQDSLVVGVLNNAHAHAQSDYGTPGSVQDVATVSGNKSQVTDCIEMWDYVGGIRFRGFVAETQDEKSMFVFFDQAVIQSSGDLKAGLMALLELCELDYFACDRLVVAIDRAADSTSLMKDLGWIGFGLATLDKFVPDDDVEAEVTSQQWLFMEMET
g1025.t1	MTQPRHQLCMIVVLSCRDASTVYVPVYVHVPRLRPRRRRQEYRDTHESKPRPKAEKKRPKNRSRGHVGRRKMGNEESSMVDPSTKPRTLSARTPDALAQYIQAGKARNIVVLTGAGISTSAGIPDFRSPETGLYANLERLNLPHPEAVFELSFFRENPLPFYTLAQELYPGKYRPTITHSFIRLLHDKGLLLKVFSQNIDCLEREAGVPGDKIIEAHGSFADQACIECKKSYPKDQMLTHIENKTVPRCVDTACNGLVKPKIVFFGEQLPADFFDNRELVSDADLCIVLGTSLSVQPFASLPHLVTDPTPRLLINKEQVGDLGSRPDDVLILNDCDAGVRELARALDWSAELDALWARTAKDGQFVPGQKEKEPAPKSRDEALQDQVDQLTKDVEETLR…
g1026.t1	MSRGGGTTLYVTGFGHGTRARDLAYEFERYVPVVVPVVVPVVMPLVVPVVPVVVALPSTCSRVYSPLPPLVHVYGRLVRCDIPAPRSASSRLSFAFVEYESRRDADDAYHEMHNKRIGRDDLLKIEWARTPPSASWRFDSGRDRPRAERGSDRGDRSSRGDDRGVPARGDRSPRRRSTSPRRDRAGSPRKDDRRERDYDRRDRDRSRSPVDGDREMKDVRDREDDRGDRGDRERGDRERGDRERDERREGEARPAVEERKADSPPPPAAHEDLDVAE
g1027.t1	MDPNKQYGAPPQYPQSPPPIHHDAGPYNQGGMQPYQQGPPNNDYYGNSPNPYQQGGPGYGPPQGPPGQYGQPQQQMYYQQGPPPPGGYYQDDRRQGQSGSGGLFAVSSQTINRHEHHHPSIAFTKPHGHQLVARGADIRLLYHRFTKPDFRAIERCREQRIDWFFFVLRCTCSAFGDTFGPSDCNRKPICREAELKLEIDRSCKRHKLLGFLDDIESLDSIDPSTLHPNIILIDNMKITAYVAVIAAAVPAVWSLPSGLVAKSFKVPTCGAETCLASSNGTFIATGASNGTAPSDLGQLCSLPQEDVTRYVQTVQPCIDGDAGRANCTEGAIYQYKDLLKSVCASDAYHRTVQWA
g1028.t1	MATTGDQLPGCTIPDSCMLHPGQGLARRDAFCENDLKCICKADNHLGNNSLFSNECLLRECTDGHDRKLFLRNWLESCRQIGRSGWDDMPWDWEPYLPNDGEVLLGPTTLLNAPPATTPSTEPSSVSVLTSTAAVATSLPEGSSSTFSTTASSSLVDTFDILSTPTTSLETTSKTSQPVMITSHTLSPGAVGGIVTGILLLVLFFAGLGFFYWKANKKAKEKNKEVAILSDRVSGCGFQRRIDELLAESNGSTGTILRHHVPAPAELAGASASTVGVTSASSSVYSVDSARAM
g1029.t1	MQHGFSVLLLYRLLGTFVDLTIAQATCVPLNNLQILPECTDECLNTHTRKCDREGCLCGDDLMSWCETREGPQIWFAQYGYCVLKGCPDDGDIESLMAIFTLLCEGSVGGPLNNDTVPLPLGDYAVKNTAKTTATPASSRSESQSLATLTGVIPAGTGTVASGSLSSNTAVTVSDSTVTELDDKASSMSSAVNTASSSKTTSDDQPVLSTAAIAGIAVGGAALLALIIGGAFFILHRYKRNKSTKLASPPVYEPADEKHAYGKPELDGQALEYQYSVMGVGAPTEYAELDAGAPLSALDPQPSILSSRQQQTLAMSGIVQPLVGGIQATVSVILTISFGVAFSQFGLLDADAASKISKTSVKVLLPCLLINNLGENLNPETAHEYVPIILWAIVYNVLS…
g1030.t1	MGVYVQERAESREQRGVTSIDAGYKAVHVSAMVAWVRGCVGICAGKSSIASYLIDEHGFKRLRLARTAATPIVEKSASDAHVPSPSASTAIEHTFAHVDALLEFVTLRWRERWVTTDIWDDKVLDALLRRPFFLFISVDAPVSVRWQRFKDRCAVDSLTPPTLQDFVLRNDAHLFAQRTGLSALFQRAQLKLLNSTTSIASLRDAVRSLNLTDEARLRPSWDQYFMQLADLAALRSNCMKRRVGCVVVREKRVISTGYNGTPRGMTNCNEGGCPRCNNAAKGGVGLSTCLCLHAEENALLEAGRDRIGESAILYCNTCPCLTCSVKITQVGISEVVYNQGYLVDDQTARIFAESGVKLRQFSPPADGLVDLSLGAPPKTPVQSEDVREILSSDDFVRPL
g1031.t1	MATLKFAPWQSDVDVQFYAALAHIKINHDKLDDSARKVLGLYETRPGDHASRSMRIQIHPNALTSDDTPPNHCRAEGIIKNCNTIEDYKNLDRTATLDRCAQTIWDAIHDGSIYECPSLLSSFTAIIFANLKKYKFTYHFGFPAIQSDPQWKQVGDTSKLSASETTHLVDAVQTFKYSNDVRQRGFFIAKRVHGGGEVDDAPKTPVTPVTPVTPAEEIGYKWVVGKLGAYEKGFFDDVDSQDRFIGFSDPSTYTDNPGWPLRNLLILIRHRWRLNDAQIICYRDTHLRRDQPNSLILQIKSDPIAEVSTTATEGPSARPNAPTLPKVTGWERTEAGKLTSRNVDLSEYMDERKLADQAVDLNLKLIKWRIAPNIDLDVIKNCKCLLLGAGTLGSYVSRT…
g1032.t1	MGRHGLHVISFAGLGATANTAPHRTRHPGSSLARASAQRAPGAGWMPVAHVQQLSAMRKRPEAASAQRLQLDVVRRTCAKPSRRRRRRRRRISVCLPPAGELVPVHHHSSSPHPPHRPPIARPSHAHRSPPPVSATPPSLQHPRLCNTPVSATPPSLQHPRLCNTPVSATPPSLQPPPSMAAADTGKRIEEAQKLAKTEPAKAEKIYQDVLSQDPGSNEQAIKHYETALLALGDLYRDQNKADALAELVRQARSVLSSFAKAKTSKLVRQLLDLFTAIPNTTDTQISVTKSCIDWAVSERRGFLRQNLETRLVSLYMAKQSYYEALALINSLLKELKRLDDKLVLVEVQLLESRVYHALGNISKGRAALTSARTSAASVYTPPLLQAGLDMQSGMLHAE…
g1033.t1	MASMEREHSQDRELVRHHGSSFSSTDRSIPMWDSADPDRAPPPLPLNPGSPTLTTRPNTSAAIMRAAKALEDKARESLPTSSYTTNPMPSRSPERSLIKGNQHKRMQSLQPSGVRDLRTYLDTHKSPDRSPDRPQTRDGSRSREAERDYFGKDMDARFGQWGTPSPPNPYDLAHTPTTRPSHRAILGENTPPSATMKALQTMTIPPHILDPPLQTTTNASTPTPAPAPAPAPAPGQPLDSISTQLLSIANIVSSLQKDMSQLSRRSKDNATDLISLKEATNSRDEDIRQSLKDLLSSMSEKQKATAAAAAAVEEARSAPLNLHDPHMTPTKQFTFPRMSSPSAWADERMGSPNPYSVEGAASVAMLEKIIREMVTKDGQERLIATLQLIVDKANGDTAK…
g1034.t1	MASTPVNGAQAVAQHKLLDQVARAPDRRSSPMPTHLTVPGSGHSTPRVIPQEGTSGSGYVAPTFEGKEQQMEGVMDGVEDKGFIPPDFVESEVKWFYNELGIDDMYFATESVEAIVTHIHSLYAAKVAAYARDDKRLEIRLDKEAEDHAVYIDTSRPGVSVLDGPRYEQRIDTKYLNNTKANTGYRVESFRSTSPLPGSDDQQLRCYFVYQCEFESPNPGETETDVEKIGDKRFLQKATANTKAIYQQALEVAVERTGPVIEWFDIEGSRDKRLVLAYKQGSALGMFSALSDLYHYYGLTTSRKYVEQFSNGYTVMSLYLSPLTGAAGAKHPPIEASIHQIIKEISLLYCIPQNKFQTLFATGRLSLQETIYAHCVWVFITHFLNRLGNEYTALSSILN…
g1035.t1	MAQRHLEKSKFYHGLVDMGSNGIRFSITDLSPATQRILPTVYLDRAAISLYDAQYEDGRAVPIPEHTIKQVVKSLLRFKSTCQDFSVPEDQIRIVATEATRKALNSEAYRAAIKEATGWTVELLPKEMEGKVGALGVASSYEKVRGLMMDLGGGSTQLTWIMTEQGDIKMSPAGSVSLPYGAAALMQRLEAAGKRKSKEYQAFAKEVIGDLKAAVQDIAIPPELLQSREGLHLYLSGGGFRGWGFVLMSEHAVKPYPIPIINGFRTSTDAFLDTMSVKAAVRQDETPEIFRVSARRASQVPAVAFLVECLSQALPTLNSVYFCQGGVREGMHFAEMSREYRAESPMVTATGPYAPPSMQQLVDLLFSAMPAPSPGHQTLFSRPLVTAFVQGVFAHMAQV…
g1036.t1	MSQTILSASAKGATFLILLQVASRALTFAVNQVLLRFLSPELLGVSAQLELFSISVLYFARESLRVALQRQAHGTQAVVNLAYLAVITGLPLTYLLAHLWLRSVTPNVPYFVRALGLYCIATFIELVTEPAFSAVQQKLLYKVRASAESTATLLRCLGTCGSAILASLVGIDIGVLPFAIGQLAYALGLLVVYLYNMWPVARNEDFTLLPKQLSLTGDSSITFNYFSTPLLRLTGSLTLQSALKFILTQGDSLLITTYTSLADQGAYALASNYGGLIARMLFQPIEESSRNMFAKLCASEPAPNTKDRNEGPQSQERKQNISQAAKVLTIILRLYTIISLFAVTLGPTLAPLLLSVVAGRKWSATTASKVLGTYCYYIPFLAINGVTEGFVAAVATNKE…
g1037.t1	MVVVDPRTVAKTERLLLRPLKLEDAEDVVLMHKHPEVMKHTAILPSDDLEKTRQWIQGCHDRDDCWNFVIELLPSRKAKFVSAQPAADHAETHPSSTKQSREQPEPRVIGLIGAVRAPEVGYMLNADHWGKGYATEAMKAFMPLFFDHFSGGDNEKYEYAEAHTDPELESSQRVLRKVGFELFEKRYQDFENPILGWRDTLVFRMARPDSQSSVTPKTI
g1038.t1	MSPHAEEPTKNGDMSNDSAPLTNGETPQSRVLSHLHSYPVVHDGVEFYKSNPYGAKSLALFNNTYNQFIAPFHPYLKTPYSYISPYLTRADELGDSSLSKLEQRVPIVKEDTNKLKELAFSPVVYVVGTYQDEYKKTQGPEGVVKTVKAGISTELKVVHDAFTFAVEYWNKGKQQASKKADEIKQ
g1039.t1	MKFLKVGRVVIITRGRYAGKKCVIISPLDNGTKSHPFPHALVAGVERYPQKVTRRMSKNKQAKKSKVKPFVKQVNYTHIMPTRYTIELENLKGTLTQDTFKEVSQREEAKKTVKKAFEERYTSGKNRWFFTPLQF
g1040.t1	MKIKALSRSTSSAQAPGSNVAKITRNLDPTQHPFERAREYTRALNATKMERMFAQPFLGDFEPGHVDGVYSFAKDPNSLEHFASGSGDGVVKVWDLTSREEKWQAQAHENMVKGMCWTHDKRLITCGADKQIQMFEPYAQPSKSPPKATWHGNAAFTSVSHHRSMPSFAAASNVVSIYDTARTSGAPVQNLVWPSAIDTINHVTFNQVETSILASCATDRAIVLYDMRTSSPLHRTVLNFASNCISWNPMEAYNFAVANEDHNCYIFDMRNMKRALQVLKGHVAAVMSVEFSPTGEELVSGSYDRSIRLWERQKGHSRDMYYTKRMQRVFSVAWSPDNNYVLSGSDDGNVRLWRAKASARQGVKSFALQQKLQYDEALKERYKHMPEIKRINRHRHVPK…
g1041.t1	MATTSAHKIQDEKFNSLGFSKAIVNKEQVCSYSRSLGTVSDGNPILVLVHGYPQSSYMCVMSIIQTWRHFIPLLPQDAPIFVPDLPGYGASAAIEKHDKLTVGNAVLSALRTEVKRTSSNPPTGDIPIILIGHDRGARVSHRLAVSGAAGFDIRGVCLIDIVPTSTQWQHNASPTTAAKQITGYFHWPLLANVDLATRMISAFGPAQFLEEMTTLCAGKNDAGSKSLKADDSLKVYGEFFAQPHVLKASCEDYQHGATTDVEREEEDQKAGRKIGVPLFLLYSETYIGGSYSFPDVWRDWIAEGVDIQHHALGGGIGHYGAEEAPEESARVVGNWVKGLRA
g1042.t1	MSAPADGKQGFLAGLSPWGSRAATPKPPPTPTTTEADKTKGKEKEKEDASTGRLGTQRGGDHVIDRRHRLSLKRPDISELPKRKPLSEHAITPDKSLPKPKKWIPFSKGDSRAIESAFQKTADEAGATEQSKDLLSPVAPVQPSNEPPATTKVPVNEDYLFDVEIETRELAPSYWLGPVYDVKRGTWFTPSGEPVDEGLAMQLEEGYLKCKPWRLGKPDEKRSASQPRARPVSLGAGLSDDHRKELGRLNRDSTSNPVTPRGSFDNLRGEANKQQDGTSSGERAATPNAPAEIPRTHRLFGAHMNSTVTFQDENTAWLLTDDMWARMGSTLYQRFAGGAHYAGYKYIRGYTDPTEKKQANASKDPKGKKETERPSTPSHLAYGSDNEKPTNTGSGGGSD…
g1043.t1	MIVTLDDYRRVADSSARPSDNEPPKADEHRFTVARAGQLKLKLQALNHTLTRTPPAQHRQLQFDEIVRSTTSRTYVDGSEEVYFMVKNLPWPEDIPVVFIQAYSEVLLSRPFTNAYIRKQFHTHHHPRTIAERFAPTFSDIRTMLPGLDVVCDTMLDVFFRDAEQKAQYFPLYRLPTELRLQIYDYLLPHSVYLPMHSRKFPRDGTLPERLGIMRVSKTIHDEVAQHCFDQHILLFKACRDARHHATRECFTTETTEDYAERITSISQSVKNKLTRLEIQILPTEESSQQSLRDSHPLADKVSLRRICDALPNLESILFSYAKSDWTRAGVFHTMWGTKHYQKGGPINDNRKVTLEWIRAQLWLPVGGPRILWDLTYFRDSVQDAKQLRKEIMAERMMR…
g1044.t1	MPHSISPESTPADESSREMSQADDTQPGPEREHGEATMEDAPSPAPTSAPVEKPKVKLEELFDDDDSDGEFASSAPVKSEEEASQPAPLKITSRSSFSDPDVMRAFYQRLFPFRYLFQWLNHSPTPANDFAHREFAFTMPNESYVRYQSFPTADLLRKMCVQQLPTRFEIGPMYSTNPRDRKTLRKASTFRPLMKELVFDIDMTDYDDIRTCCTGASICHRCWTFITMAIKVIDVALREDFGFSHILWVYSGRRGAHAWVCDKRARLLDDQKRRAMAGYFELLKGGDQGGKKVNVRRPLHPHLERSLSVLKEHFQTSILAEQDPWASSEKSAHLLNLLPDPTLRAALQKKWDSSPNRASASKWADIDALAKSGALSKSSKELLEAKQDIVLEYTYPRLD…
g1045.t1	MATTEEMVAGDGWISDDSSFYGDEDEQEHQESLSNQATPKACWSSHSKDLNAIVSPAKLQARKEAASDVDATPTKKAMPLTTSTRANKLPGSSGLDRKAMEDERLARLAKSKRKRDTSPEAPPRRDLFNPMEGQPFSWQLGETADAFVKRVPPFSTSALTCEWIWAVNPHRDLRDKSASPRGAAFKDRGTKLLADSLQRRNEIQEKGRLGPRSTVTRAWNQETRALQQSLTKLAVETGVLSGKWMLFPKAEEVTHTWKTVVEAVITDRLGPTAKVAPDDGKDERLICVYTKDFRDEDDVLRVLQELEDLDLLQHGRGIYYKSDAFTHLDLYSATANKYGLQASLYTSQKMLAAAQAAQLSMSQNTASQQERKVLKCFY
g1046.t1	MAPHATSPAPQEHSRFYQPIKVIASSRAVVDGRLTEATIVISSNTGKITSIFHSILPQSDFPEGTPYTDYSPHILLPGLVDAHVHLNEPGRTEWEGFWTGTRAAAFGGVTTVVDMPLNAIPPTTTVENLNIKVDASKGKCWVDVGFYGGIIPGNDKDLKGLVDAGVRGFKGFLCESGVEEFPAVSSLDIEKALLELKDSATTLMFHAEMIPPVADSVGDDVQRANPPLAPKGPLTAYSTFLASRPPAFETYAVAEILSLAHLAPELQLHIVHLSAVEAIPMLREARAKGVKITAETCFHYLALAAERIEEGDTRHKCCPPIRSQANQDGLWEELLQDQADGVLQTVVSDHSPCTPEIKLLPPHLAPRKHSTKTLNHDQDCESVSDEGPETPMEGPEEKG…
g1047.t1	MQIFVKTLTGKTITLEVESSDTIDNVKSKIQDKEGIPPDQQRLIFAGKQLEDGRTLSDYNIQKESTLHLVLRLRGGGKKRKKKVYTTPKKIKHKRKKTKLAVLKYYKVDGDGKIERLRRECPQPECGAGVFMAAMHNRQYCGRCHLTYVFDEAK
g1048.t1	MLSTNSPQGISRRRMQHRRQLSTPNAFEMPSVRHSPVSQQQRRHNRSGMSLDLRGLNLESIHAPSPGPYQQEHSAPGPREAFLHSPVQLSPRCRSPRTPLYASRPQSPQQQPQSPNRPPTEQQLKDLHEHIQSVYGSCGQVFINILPTPAPAATQAVIPEKPAQLPSHQSFGMAPHPTNFNEVADINLQPTSRAMTFDFENPDADNGYDSSGYYTSDVSPSPQASPRMRMSQPFLQGIAEDPSQETPFSHPPTLLPALDPHMSSQGMSNGLSLPVSPFEEAPMYTDLEIDASLEYTGIAPEEVQRYISEQDPKTNKWMCLYQDCGKVFGRRENIRSHVQTHLGDRQYKCNGCGKCFVRQHDLKRHAKIHTGNKPYKCPCGAGFARQDALTRHRQRGMCV…
g1049.t1	MVEKLREGKGKGKGKEKEKEKEKEREHATVLQTQAPSDPEQIAGATPPPPQQPQQPLAADAPCEQAGVLHSLLYTAPPPSPHGREYTYPFHSTHSPLPVTTHASGLLGPSPSPSPSLSPMPPRRVAAAAAATAGE
g1050.t1	MPASTRASTGNSKPRIVQQIEDVVAPKKRTTTTANTSKPRANTTAGRVAKPKLTATTTGPRTKIVKKRRTPTEKAKDKVVGTAEKLVGDVKGKPGKKAAGTRKINGTGAGATRKRI
g1051.t1	MTVPNGTNGSSPSKGSTFLFTSESVGEGHPDKICDQVSDAILDACLKEDPLSKVACETATKTGMIMVFGEITTKAHLDYQKIIRGAIKDIGYDSSDKGFDYKTCNVLVAIEQQSPDIAQGLHYEEALEKLGAGDQGIMFGYATDETPELLPLTLLLSHKLNSAMTEARNNGSLPWLRPDTKTQVTVEYAHDGGAVVPLRVDTVVVSAQHSEDITTEELRKEIKEKIVKKVIPAKYLDDNVKYHIQPSGLFIIGGPQGDAGLTGRKIIVDTYGGWGAHGGGAFSGKDYSKVDRSAAYLARWIAKSLVNAKLARRALVQLSYAIGVAEPLSLFVETYGTSDKSSDELVEIILKNFDLRPGVIVKELNLTNPIYNQTAKNGHFTNQDFTWEKPKELKF
g1052.t1	MSKFGTLVMGPAGAGKSTFCTGLIQHLQNNKRPCFYVNLDPAAEDFAFEPDLDIKDLISLEDVMEEMSLGPNGGLIYCFEFLMENLDFLTDPLEEVTEDYLIVFDMPGQIELYTHVPILPGLVKTLMHGSLNIRMCAAYLLEATFVVDRPKFFSGTLSAMSAMLMLEMPHINILSKMDLVKGQVAKREMKRFVQVDADLIEDDPSRKTTDEEDNKKYRDPATTESLMSGSAFHKLNKAVAQLIDDFSMVSYLKLDVQDEESLGAVLSYIDDAIQFHEAQEPKEPKEADMDE
g1053.t1	MRRLLSVPLFLSVSSALWPIPKSYEHGDTVLWIAKNVTFYWYQAGARNVDYHPEQAPFLFAANSNTDVHPQDSGGHDLSLHTRYTQPFDDYHPERGAEGVKGGDIVDYAIRAAWKTIFKQGFYPWKFHARNWEEPAPGKKARYIDHVDIRLLASEPSDVAKALAGEVDESYTLSLTDAGVASIAANSSVGIARGLTTFTQLFFQHSDGKQIYTPLAPVTIYDEPQFEHRGINLDVSRTFIPVPDIKRQIDAAAYTKMNRLHLHATDSQSWPLEIPSLPDLARKGAYRPEYIYSAADFADLQRYAALQGVQLVTEIDMPGHTSSIWYSAPDLIAAYNQQPDWDTYAAEPPSGTLKLNSTAVDTFLDTLFADLMPRVAPYTGYFHTGGDEVNLNAYRLDSS…
g1054.t1	MAAMAHIAPTHSLTPCLLGGLIVLYVGYRIASTLQTNARIRKLGARAPVRKTYVPFGLDMAYEVVSYARRNGTYDMWLRMFDQWAGPGRYTIEAGVGERVILTAEPENIKAILATQFKDYGKGEEFRKAWHAFLGNGIFTTDSTLWHTSRQLIRPQFVKDRLSDLDLFETQTQVLVAKLAGGQPVDTLDMMFRYTLDAATHFLLGTSVDSLHHPQTRFADAFSNAQRVQSIIARLGPLNWAVPRTRMGFYDSIKTIDDFVSLYIDRALALSPEELEKKTSHDADYTFLHAIAAYTRDRQMLRDQLVSVLLAGRDTTACTLTWALYHLSLSPAIASKLRQEILDTVGRPASKPTYQHLKSMKYLQHVLNETLRLYPVVPYNVRVALTDTTLPTGGGPQGD…
g1055.t1	MAFAQQHRPPTSRQLSFHAPEPAAAVATSSQQLKRRLEESEEWVLFSPTAPSTIARTHTTSTERTPRTAGLSRFSECGSLDTAARSDHDDDNGTFLGTEEELDSLDDGLHAFHEPSEHALPASRLQQSGDTVLPNHDGLGSFHPDATMQEHMWQFERSPRRRAARRRSSVQRHLTVLDDTDQVTQEQERRQRIEKWRLEQSKAVLEEIERETRRRRRMSMATSARSQRDTARQDTASSTSSAACTVTSEQSEQSEGSDEGTENMSFWQRLTTRVIRDLIGLDQDTLSVIFGETLPEEAMTPQAASPMLSPANQALRDAVADASADPGEDWQTRVLERVAQELGVLVHQLSEHPGAFSTYQRAQAAPEYAGLAPAVATDLASSLPTSSQSSAHSPASVQF…
g1056.t1	MCSETKAAPDLRHDRISAALTYSTLSIADWLQSLCALDHARSSTQLLDAEHTAGNQARGAHASKPWSGEPHPRHWTLASSSPSFCDVLPPTRSAWNRIAHLYLLLPQQFNPLTWLDFERALHESVITGTPRLIMPMIPYFQHGGVQVPLGERLPSLLPPSSSTSSVDIPAYPSIDIPTSTTPIAVPDAALDAPYKHDLPTIDISTDQPSNEHTSGRVPSSVADSGSSSSNSDDQMKGRKPAFAAAGTFFGLFSFSQIYQNVLFDKITPWSERLEEKTWVASSQSWIDRKTCDWFGVCGLAHLNKSRWTSKGTEQTPLDGKDAGKIDLSSFKEDARILPDDYDEAEVVEIPQYILDHAPLIHLYSGENFWPCDMTDHLIHTTPHLNYTPLQATDNHPNVR…
g1057.t1	MASAPNDPETLAHVQKFWEARKPRSPIYQFLLDDIKLTHASKGVVRARLLLTQNHVNTHGGIHGSVSATLIDWVGGVAIAAWDKRDKAGVSTDIHISYVSSAKDGDWIEIEGQANKVGGTLAFTTATIWKVVDDQPGPVVATGSHTKFVRI
g1058.t1	MSDSVAANANAPGIAADEPLHEMADGVANEVADDVMQDTTPQKETDQALPFDVKALTDRALQFLATASNETLGACLVGLGAGTYLILGRVGLVLIGVVGGVVLHATWEGQSQTGESPEQKGRSSESRKRELGAHVAHRILDWRDNRAQEKQEGDTGSLDLSVKLYSGKKLDFSEFKPETAAALTELTDAVIRDYVKWWYSPILPAEDAFPDSCRQTFTAFLLSVSAHLSRKRPADNFVDFATRSSSFMIILLQELSTAIMASPGDAPTEAVDIYLKMKRDSTLANILDPEYQTRQFSVAAEDILQNYLEAKTYNCMAARVFLHQILAKVVLEMIVVSCSKPDFINGWIVYLLEGGEPELMNAIDAGVEESSGQLQNVKNNIEKTTGETMSPERKEHRRR…
g1059.t1	MTDPIDDEWEYEYDEVETEDFYIPIDLSNVPKGQKLVDSERRTGHPTLLKSRLRALNAQRGQQQQDASTGEASSEQEPATLGEAQIIGLHTPNPLVMYNGQLLSCQWASTIGTDMFFAKPSADASSEEKPLRSLPNVDLLAISSAKLVAKVGRLRPRDDLFDGVGEEDGVAAAAAPTEVNNGEAQDSAQVSEPAPTSFLARINQVKAKRGDSTRLAVSQSGNGLRLVSKAASDAAQDTTGQGTEDVEMGGT
g1060.t1	MAPTSPRWNPGPLEGNLGRWLHLSPSPRSTTFLPSPCTCIADAALSTLAMLPSSRYSRRPRRDRLSIDILPEQSLDFEPRSPHLHWLFGESSAIDINSRLVEDTSPEAMEDEPGHSRSYAAIMREVAAWLELDEHDEFSASRREHAESILPAASQLFARLKDSDNPPPHSPNSDDGFDTLIQAIALQLLASCYTFLPASSASQLPLLQQKTDKTLVTALQAHSAHRLSPAAGHHARAPSETSAWPGLYTGPGPEETLAETTSRRRCSAKSSTKAQ
g1061.t1	MSASLSTPPSDIAFCHHHLDHLDASQPHISTPTMAAPDPKEAWQRIQNELTRRTSRLGGSGGGAPKGTAGGIAGLVLLGGGLWLANNALFNVDGGHRAIKYTRLGGVQKEIYNEGTHFNMPWFETPITYDVRAKPRNVASLTGTKDLQMVNITCRVLSRPRVEALPQIYRTLGTDYDERVLPSIVNEVLKSVVAQFNASQLITQRENVSRLVRDNLVRRAARFNIMLDDVSLTHLAFSPEFTAAVEAKQVAQQEAQRAAFVVDKARQEKQATVVRAQGEARSAELIGDAIKKSRTYVDLREFENAKNIAQILEKSANKVYLDSNGLGLNVSQTTSDKEKRAKQ
g1062.t1	MADTTHIQNEPDDFKSLIPEVYLQPSAVKLENLPEAQASRPLQAPETSQQQSDSQDEGDSLRARAEAAEERTSTAEDKVQRLKAAYYSSLSQCSRALPIRNALLRQTIERVLRKARLKKRILQMVDDLSNELVDCQEHAFAARFLTATGKDEAHFVHPAFWKNVAVCQSASASPDCERKKIEKHAQNADMSPGRSMLLATVVCVPVGFQKKITVVAAGFNRSFASTDA
g1063.t1	MHITPRTLQTIAWSTLAVSAARAQYIIDNLSFGHKDGVYISPDLRAIPHFDVQGIDDYKPQVLSDRVILTPPYPGSKRGALWANNPMHHGGDWTAELDFRATGMERGGGSLQLWYVKDSQAHDSPNSLYTAPKFDGLVLVVDQYEGHGGSVRGFLNDGTKDFKLHPNLDTLAFGKCDHAYRNRGHLSTIKLRHANGLLEVTVDGDACFKTDKVKLPQDYYFGVSASSAENPDSFEVHKFIVSTTNSHTREEPNHERIPDARNQQHQQPVQNQPHQESAQQQHAQQQGSPPKKMASSQQIPPWIQDVLASNVKTQDDQFADLHNRIQDIAHHVSAVYAAIEALDEKAEHRHNELMSHLAPLDDRTAHNVRLSEKTETTAMQILRDLESKDYKDMIGQMHR…
g1064.t1	MPSPSDILSDPDISKAYEDVRSDKSETTWLVLKYESATKDNLKLASSGTGDIAEMVETFGDDEAAYGYVRMKLGNDEYSERVKFAFVVWAGPNTKIMRKAKMSFQSGQVKQVIRTYAVEIQTSDKRELEADAVTMKLRKAMGANYDRQGSSY
g1065.t1	MPASAVKQMLQCTPRLKSFVYEYFRTSSTLELDHLHTGIEYVRSTLEDLTVRIGIAEAITVEPSGRAREVLCGKLGSLRSFSALKKRSTSFFAPFGQIVDIQAAVYDLSSMLPPHLEHLLIADDLWNLFRIPAIHGVFCLKHAGVFSSTKLDSTGATRKDSFGPRHLPLPANTVKLELPSISSVHARGPVDNWYNAQYAPKTAATNERLPALPHIQSYSSSLPTSSTNSSPRGDSISGGSTASSNTSYAASVHAQTAGSKTPSPEQTPQSLNRDGQPLHAQSQQGPSYGTQNSFGYPQAGYNSMNQMQSYADVHPPHMSAATAHAPASGPPAGLSHYSYPQQPSMLQPGPQYGSAPPGYPSYGYSNGLPSQLPASSSMNSSMVPSTIQLPAMSSGAPAP…
g1066.t1	MNIIKLQRKYPQFGQGEIFGLQDAFRKLDVDDKGYLDEATVIKATQQTEHQPYDVVRQALKEVELDSSRRVELDDYVDLISKLRQSSPAQQRMSTGPTRPRAVSGAAGSAPSTPKHASKPSIGGGGGGRIQVQGSSANVTHTINEDERTEFTRHINAVLAGDPDIGDRLPFPTDTFEMFDQCKDGLVLSKLINDSVPDTIDERVLNKPGRKIKSLNNFHFTENNNIVIESAKGIGCSVVNIGSGDIIEVREHLILGLIWQIIRRGLLGKIDIKLHPELYRLLEDDETLEQFLRLPPEQILLRWFNYHLKNAKWHRTVTNFSTDVKDGENYTVLLNQLAPDTCSRSPLQQNDLLQRAEMVLQNADALDCRKFLTPTSLVAGNPKLNLAFVANLFNTHPCL…
g1067.t1	MRNVMISAICIGLLACYAEANAVFAHFMVGNTAHYTQGTWETEMSLAQGSRIDAFALNVAAAESMNEDQIGFAFKAAQARGFKLLSTFEGPDHVHEWNDIKRQFNCFFVPDWSSKGAAIAVGLSDGVADGLFNWAAWPDCGSKDTYVDASYKNWLWRGEALWYERWVQALHVQPEWIQISSWNDYGESHYIAHIRGDASLIALDAKYGQAPFNYVRGIEHGAWRAFLPYLIEFYRSGTASVSQEGLTVWYRLQPRPAGCNDGGTTSFTATRMQPEGPWYTNLTDGVFFAALLGSTATIE
g1068.t1	MTIIGGAFGVAGGVAWLANPGAGAFLGTIGGLLRIASSIKTQADIKGKWARNATAVLNTRLGTNLNSTSKAIQLMANVVFREGNFSKIRRSTLAYKDNEENKSLKTDVAKFFADGKFIEPVLGADYDLFKEKLVKALKASLVSTALLLANEYILRNAHTLNNCEKNNRKKLNINSIREYCYTLEYPSSGRKNLHPNQVPKTKQLSQAVDKDMLKDKVETEYKAPLSKIIYVLVDCQQKQNTYLRP
g1069.t1	MAEPTTASIYESVPLPLGKSVSIRVITIRPSINGGFDRISCDFHLLDLDTKLLHISTTSTSERGPVQYTALSYTWGEPSAEATINLNGEPFPVRKNLWAFLSQARSNGLEEYLWIDALCINQTVNEERSHQVAIMGRIYSSASRVIVWLGVYSGLAAEGLLWTTAAYLADDLTLDTLPGYEKQLEELFELPYWTRIWIVQEYVLAKSIDIWLGYLKRDGKMFGWLFKRLRIKSEAWWSNRRSFSINYPELEPFYRLRHFPGMSIIIRRESEHNFSLSKDPEGNYLYSAQRLAMIICELGPNMRCTDPRDRVYALLPLLSREASEMLSITPDYSKTTAEVYASVVDALERHKDIADHMLVPRAVRNLEHMLCLGEDEPEIPSL
g1070.t1	MRLIEEYLQALRECTTLTCNTHQRVFARYLSVVGPTWIPYSATPADDGFGMSKTACQALGTERCISFKKIGEGNYNKAYRLEMDNGQKVIAKVPHPNAGPQVLTTSSEVATMEFARTVLNIPVPKVLAWSATDQNPVQAEYIIMEEARGSQLHKVWQDLSLRSKSNVIREFVDVERKLLSVSFNKLGSLYFKDCGIAGCKPAVVTTCPQDVVDHIESRYSIGPITRREFWKEQHSDSRYQGPWISSAEYLESIARLEIDWISSHANVQEPSKSPWQYISPEQNSPEAHTALLQKFLLIIPHITPQDSELVSPRLWHPDFHAGNIYIDDQARISCVIDWQGAWNTPVFIGANPPLLLDYGIDMLMKLPDNFKTLNDATKDQIRYQVSQSILIQAYETLTA…
g1071.t1	MQKPNTDPTGGRAETKRASRPRADLFCVYNTSTQSADNRVAAYIVEYKAPHKLPLGHIYEGLDDIELEDVVWCREVESSRDHFRCFIAAAI
g1072.t1	MTEHLLDYKELFLQEQCWREFAELKQKEAEMIQRNECHRCEEAEARTRKTMLPEFFNARHHHLHLGLAVQTDASLSTRGDSANANNKLRSERLRVWDDIMEPGFA
g1073.t1	MSKKSKNVRNGIPDTEAGWQKILNVSKQLGHSQTLENTQLKRLPTVANNKSSSRGAKKQREFLSRIHTISLYHYLLCAISFSQNELDSTRASVLEALVNKITSSPDDAAIIHSGVRTLAASLNIRQAERPPQFTNAVLKGTKEVFREHMSDMIRKVLVENVWKAAVTMDFPSWPTPDNTVPCLMSLDICEKDVQELFKTLFNAKADWVAGVLHIVHESGMTQIVPRSEITLKGVSDQAIIAIFGTEIHAAITECPVRVKELADGRRLTECVSMIISGREGTVSLAVGLRGGVHIQGKLYR
g1074.t1	MNRPQSVRTLTLCPPVSHQVQAGYETISSINYVVRSEDKPLGGPRQILTVFREDGNSYVKFNMARDYKRSQDGRVHEYLPFTFEVGEFRQRFSKSEHGEVMEELNKKVAELNKDKSEVKSAMTIWLEWFSGWLQPILGCLPLESGTRPADGLQED
g1075.t1	MVEKRPAAEGAAGDAKRSKGSEAIAAAKAKAAEIAARFAANKAGASATPAPAPAAAASDSQAKLEALKARMAAMRGASTAAAKPTTPTPTPAPASEPTGPRFATTLGNRRAETPAVDAGPKAAAPRQKQQHHDDLENPYFDPRAASLPGVRTRISRGLQFNEHGKYLDQASKLRAQARLEQIKKMLAKQARRAGLDENSERGFLVQPPPDIEWWDEGILKDKTYDCIHDPAKVMVDTDDSIITLYVQHPPLLKAPQDQRLVELKPMYLTAKEQAKLRRMRRAADLKEHQAKIRLGLEPPPPPKVKRGNMMRVMGEQAIADPTAVEMLVETQIAQRQHDHEQANEERKLDDDQRHAKLQTNQEKDAQRGLYLCVFKVNTLAYGKHRYQIDLNAKQHALTG…
g1076.t1	MNTAQPTSSAIEGVEFGFLSAPDVRALSVKRVTNPTTFDSLLHPVSGGLHDAALGAFLDNPLPPPTQVYHLPPKSTTSHPSLPPPTQVYHLPPKSTTSHPSLPPPTQVYHLPPKSTTSHPSLPPPTSHTPPTNPARCATCGLTTMLGCPGHCGHIELPVPVYHLTFMDQLLRLLRGKCAYCHNLKLARVQVNEFVSRLRLIRCGLVKEANEMHEFVDASKGKKKNKDVADSEDDDDDENEDIVGQRNNYVKRCMKRAGISKHHARSAREKNDTIAEARRLVLKDFYAAIVAGKKCRNCQAINPTFRKDKSIKIFRRNLSAKEKAQMAQSEKRLQNPLDILARRDAKAKNMSVHDDEGLADMSEGDSDEGIDIDMDMDDGSLTATEARTATKTRTATDAA…
g1077.t1	MRYELIFAGVAAAYNTYGYEAYGDNKARSSAPAVKYSSSAPAQGGHGDDYKTSSAIAPSKASSSSKIGYTTITPGYGKQPTVINDYNSKKVTVTYVEKPITVYHTKTTITQYPTASSVGGKDGKPYPTGSYGYDDNKNGTKAWYEMYEKVHEIKYKDLGDYSLPGYGGSGLCKSCDDEQPYKAPTPETKTYEKPGIYTEPVEDVTVSYTMTKPSEATTTAKAGVPVTYGGVTTEFKETGVKTCAYGAYETGKDQNGKDVTSTVVKTVTVTISNTGKYEVAKPTTTVYDHDAEITYPTISVYQPGIYHKDAQTVTITKSGDIYSCDYKQTKTHPAKPEKTPSHGAEYPYGNNTSTEYKPEYPASTPSVAKSSSKPDNKYPVTFSVPAYPESTPVYDTKSS…
g1078.t1	MADIPALPDTGAKKQRRRPVNGNFARWFVAKVKCDERPDGCLNCERLQLNCVQNGALTTGVKRSSAALEPLGIKRKRTFRSCVACRDSKVKCSGERPTCTRCAQRTTACLYDTETNEPAWVQSISNTVSAVTSPDASVATQNPQMPRNAFSSAPTDLAAVDCPPGLTWLFAQELPPRARLHTLLEAYFNNVQPIRVFAFEHKPTFMRMLDEGQLTNTSGQALLHIMCALGARFYALEYSESFAPLPKELIQNAGTQWAKIAEEMFFADYSTISTTKLKVLILLHDQEARTGNYAGSFLLTGLVIRMAHALQLNNESSTDVLCKKEGPNEASVKECQRRLMWACYMLDVWAGSGVDHLTILNEKDIKIQLPCNERQFLLQIPVVTERLEEGQTLDFIPKA…
g1079.t1	MASAGEVRPEIHDPETVHDNEAALHEKKDYSEPSNELHENPARVATNDHDRAHYEKFGTYDRYEMTEEDCYDELGFSFPEWKKWMILSVVFLVQVSMNFNTSLYSNAVGGISEEFGVSAQAARVGAATFLVAYAFGCELWAPWSEELGRFPVLQLSLFFVNIFQIPVGIAPNYATIIAFRTLGGLSTAGGSVTLAMVADMWEPDNQQYAVAFIVFSSVGGSVLGPIVGGFVEQFLAWRWNIWIQLIFGGAVQIAHALLVPETRTTVLMNRIAKKRRAEGEKNGKPVNIWGPNELTPWRERFSAHEIITTWIRPFRMFLTEPIVLVLSLLSGFSDAIIFMFLQSYALVYAQWDFAAFAIGLAFVPIGIGYLLAWFSFFPAIKRNERLRKERPGDEIAQYE…
g1080.t1	MAGGPAPTGPSASPLGQAWGYGIVLGLGFLFALGMVFTTWVLRRYNNELQTSEMFSTAGRTVKSGLVASAVVSSWTWAATLLQSSSVAFRYGVSGPLWYAAGATVQILLFATVAIELKRRAPNAHTFLEAVRARYGTATHFVYITFGLFTNILVTAMLLTGGSAVVTSLTGVPTAAACFLLPVGVVIYTMFGGIKATFLTDYVHTVILLVIILTFAFTTYATGNRLGSPRAVYDALQDLSAHTPVAGNAGGSYLTMRSKEGAIFFVINIIGNFGTVFMDNGYYNKAIAASPVHALPGYIIGGLSWFAIPWLCATTMGLAALALQGSEYFPTYPNPMADADISAGLVLPYAATAILGSGGAVATLLIVFMAVTSAFSAQLIAVSSILTYDIYNTYINPKA…
g1081.t1	MGGFKLLSLAAFAGSTLGAPLEERAKQPKSFFKEVGNSTWVIGNDVWNVTQNLQYANKLWYKGKDRVGQAVGHYVSYNGAASDLKWTSALVVDTGSDWINIKFTAIEGDMHWVIYDGLHGSYQYFVNRALPTLGEFRTLWRLDNVSFPNARTNVRDGPLPALAEYTISTNVQDETWQKPDGTFLTKYDWSSNVRDNDFHGVYGDEVGSWYLNPGKDYFNGDHLKQELFVHRESKTGDAVQLNMIHGTHYQAVSRDVFVDGKVWGPWLWYLNDGSKDDAAARAAKEESAWPYKWYNDKAYQSRGKIQGRLLLSDGRPAAGAAVFLGDNNNSTISTLDQGKDFYYTSYADVDGKFSFKDVRTGSYALQAWGNGGAIGDVTTNFTQNDVVIRKGDTTNLKDL…
g1082.t1	MLDATNPSPIPSKRKKHFEHLRQTTIPRFLFRAFHLESSGGRPKALSNPNITVPHAYTASAPVPGFYKTPERDLGRMANAHYVGRHVPLSPFSSWAASLHLVLCYASSLDDVAYVAVMDTQMLDGEVLVWHVPHLMSGAKHEYLAHGVIKGSGYVAVPLQAMAQTGLLNVFTELARRKLYIEAPPPAFSFGMELRQHMFEQKYGRPAAEILHKTRVISDLFGELWFPVATALLCVRPWPWFWPDVDQGRSAPARRELQRILRSMKITAKPAWLESQLSWLQHGAVQTTPGAGDSYDFPDVREWIDLLHAIARHFESEETKKRKPEDSTVAAGDERETRSKRRATESNKVGSL
g1083.t1	MQSSKPAPLDPPLTKSKPNNLQPPPCTPSTPAHQTSKSQTHTTPNLYKPPVLAGPRNRLARTCHSAPPSAHSTLTRETKVSLASDESIGGLTCASTAQHSTEHSTEHSASIAQAQCNLEASSIIAVK
g1084.t1	MKYAYAMLPALAAASPMIQVGTIHNDAAPILSSTHSKEIADSYMVVFKKHVKHEHTKAHHDWVQSIHTKAQSDRMELRKRSQFPITSDVFEGLKHTYNIAGGILGYSGHFDEETIEAIRRHPDPAPASSSQLQPAPASSTARLRPLAATVERQQLHATFLRVKSSAVLHAPARDGASDLQVDYIERDSEVHTLGGDDYETEKNAPWGLARISHRDSLSFGTWNKYLYSADGGEGVDVYVIDTGTNVKHVDFDGRAHWGKTVPNGDADEDGNGHGTHCSGTVAGKKYGVAKKANVYAVKVLRSNGSGTMSDVVKGVEWAAQAHTDTVKAAKNGKKKGFKGSAANMSLGGGKSTTLDLAVNAAVDAGIHFAVAAGNDNADSCNYSPAAAANAVTVGASTLL…
g1085.t1	MATTRPHRSSTAASRVPPTNDQIAELRGLADDLLRAAESCPPTSATLHSQGHALRRMRQLLIDASDQTHTKDAFRHVRGFDVLLTTLRSLSGFYTPAALAPPDRGDFFDVIKATLDVLSDALNEHAGNRRFFARRVDDGGWSALEQALASTGILGAHAESTRDDAGQEQLFGNLFAFALGDEAMTRIFRHVDSHVDSNVDTNLNQAQPQHHRASTRGGDEGEGGQDEDEDKDKDKDKDKDKDKDKDKDKDKDKDKDKDKDKDKDKDKDKDKDKDRDEDEEQEKVKVKGEAGDTLPAHVPVSSPRSAYDDAGINLDPLRSHLRKLFSGNEVLQNPDIMPTIFHFWRGLSGDDAPGTKSKPLSVAVLLAVLDITKLSSYNKAGLHITGILSFILPLLFENK…
g1086.t1	MAERTYESLLEKLKGLFECADYSDFTITCGVETFRVHKAIVCSQSEFFKRAERFPVGTGAANGTIDLPEDDPAVIKLLFQYLYEAEYEPMFTRPDPSQCSVKRIQVQGRRLEDYHYCFPHTCSEGCLPPGHKVCPHHECRDTTCQDSCTNFVCKECCPDHTSTVDKKHTLKGDASRFILHSKMYEIGDKYDVAGLKELARSKFIYACSHWWNTEYFAPAAQHAFFTTPESDRGLRDIISTTISRHIDLLNQPEVEAVLNEFNGLAVGILKLRAHYLAPQAAAPPA
g1087.t1	MAISSRDLVLTSIKGALTSGAYSDLAITCGSDTYNVHKVIVCPRADFFARAVKFGGEEAQTGTVNLPEDEPEVVELLVQYLYEGDYDPVLLPTEDIEGSTTSVRVLKKNLPSPPYGVGNYSYSFPHRCSDTVYRCDATWVCPHHECGRDYARSCTAFTCEQCTIPGEPLLPPIHGDASQLLVHTKIYEAADKYEVVGLKDLAKEKFARACKHFYDTPEFPIAAHYAFSTTPEDDKDLRDVVSATIAVNMGLVKKAEVKVLLTQFNGLALGILEQKIVENGW
g1088.t1	MANESRKQLLADIRSMRAKNELSDLVITCGEDKYCVHKVIVCCRSTVFAKALEFPGKEAEEKCIDLSDNEPAIVKLLIQYLYEAEFDPALPSPEMETENNIPPQDTPHTCSRKDKYQCSKASRYRQVCPHHYCGSQCDFDCSEFSCGECSSSAVDGAGHLLVFAKMYEMADKYDVAGLKDLCVEKYKRACLKFWDDPKFAQSAYHVYCTTPSRDKGLRNIVCKTLSDHMSLLEKPEIEDLMTEFNGLAFGLLFDKAKQSGWCDK
g1089.t1	MVLQAMTLFIISLQNIDARILWMLSGIAQRIGRRIGLHRDGDVLKLPPFEAEICRRLWWQISILEGFFQKLAGTGTGANAQVLIGDVKLPVNLNDTDLFPGMKELPKESDRATEMMFFLIRCHLGEFFKRFASKQTAFDGVWSKLSTNTVDVYTEEKAIDELEHLFEPIGFMMRFMSYAANYQGKIESQAKKDILFSLSLQVCSSQILAYTIEEMQGFTWHVNMHFQWKTFVYVLSELRYRTSGPEVEQAWKNVQLTYELHPTFDKRLSERALLIAVSNLALQAWDAYIAANGMPNGGEPYFVPLLRSRQYLHKEPRSLSRQTGASITSSVPSSRPNVVRDTNPNEVMSVDHLAAFVWNAADLNASLGIPVVMPDLDPLDYPEDMNWSTWDNLLVDFQT…
g1090.t1	MHIQSTSTTKKEKERQALREAGIDPESLLKGRMSDDDSVIDQTNVHDIARSRQTGTSSAEPPLDERGILVTEHGKSRYLDTSIWTSLKSELGDLKEILDETSDEDSSDYNGASAPELFSSDGSRLLFGSPKAATGLRHLHPQPTEAFKLWQVYLDNINPLVKLFHAPTVQQTIAEANGNLDGIP
g1091.t1	MRQSIAILTFLASAALADDVLSFIFPGGYDGVAPVATVESVNPSTTSALVTCPTGTAADECGWGNGLNVQIISGTRYEAVMSAASLYVSYGCDYNSVATQMTCTAETSDQDAQTAILSGSDVAFITASVVEGAEKLSGASATGSASASASASASGSAAPTSSGSAAASSALRTSIASASGTAAAGSHASGPPSATASSSAPQSTGAAARFGIEGTALLALAGAAALNVL
g1092.t1	MPFLLDFPRDASPRLRGLQICQLGVVSLTAVCTFLAAVIPSKHKAFTFSLLYGLILTSITTSFLINKEQKAAAQGALTKDNGTWIKGVKINTLQSIILWLGMFNWIFLWASLFYSCCMTKLETGQIRLEGEEANITLGHNETANDEAHARCLQSQDPNWQA
g1093.t1	MKYTIFVGAVTAFAAAQTITDLPPCSLECLAGAIGGLGCGLTDFACSCQKASQLTPVVTPCVQNACTDPADQSKIIEVLSKICAAAGFPIEAPAAPASSPVVEPTPAAPSEAPIETQPSATEEPGYPEYPTASEVSSEYPEPTHITDDVPNLPTSYADLVSLPSVIDTIIVSRPSSKPTSVPGVLPPYPTGTPVPAPSGTGSSSTTSSQLPEFTGGVRLVKAPIVAAGIFGLAAFVV
g1094.t1	MGLSTEFNPDPTFTAWGPFIRDDYYVQPVTYRAIIVAGLVFGLANLFAISAAPSFWFYMSILLSWSIQVQLLLQIIINRVRIILADKRKGRFLMIGTAIIVTMINISVFCIWMPARLQISNQWIHINNIWDRIEKVLYLCIDGLLNFYFIRVVRANLVKNGLEKYNKLVLFNQHMIVISMLMDVTIIAAMWIPNGFVYAIFHPLAYLVKLNIEMSMADLIKRIATDRSRNSDLLIIPNSYNNRSSHDSNSNSNSLHPSRQTISILRSVFGRDQPSPSLAGSANNGIFMTEEFRMHSEPLKDLELQRGLQYEHRDRDGSSVLSFGDTVGWANMHRSRNDQAECDTSGTQNPPKASSANDEVHLIRPAPAVLRQS
g1095.t1	MAHIARRLFSTTTCRQASAAEASAELFERFGHGKPVSIRKQVLDANQLQLLNITLNRTPSSENPPPQGTPVPPGHHLVYFTPSIIESELGLDGTDRTVNPLSPYTRRMWAGGELTWAQDANGLLRIGQEVRETTKLLSAEPKKLKNGGEMLVVGVEKTFENFKGIALVDKRNWVFQKEILPGNPLPSPTRPEEKALPTGDHKKDFCQTDVTLFRFSALTFNGHKIHFSPEWCRQVEGHRNSVVHGPLNLINILDFWRDTARNGSSEAVPKSIAYRAMSPLYMGEPYRILLGQNGADEQKGRRGQWNADIWDSYGKQSMKGTIQE
g1096.t1	MSPFGLPHLGYSQKEAALCRAAKSHLIAYFPSAFRQFDFSPTSMDDYGDPRPRKRAKLACTNCNARRVKCDVTDQQPCRNCATAQVVCETRESKRGKHPRKLRVENEKRNGIVKIDNANNNANLGMLPERHDDDIAASHVLASLSTKFHSPAENQTANNEIDFQFATPRTRSESQVGFQQTETTRPEDDAAVFLGESSSLRYVTGEETRVPARDRPRLRHAVPNAVKAEALVPEWEAERRRKRMEALQAEGAFSFPPSSVRIALLEAYFQWFHPHFAIVDEADLWESHRQGTISPLLLQAMLFIGVIHCEELTLRNLGWGNRHRARYIFYIRAKDIYDASYETNKVIVIQAVFLMSFWRAGALLEKDARHWLSAAISLAQTKALHRSTGESDEKSAKLK…
g1097.t1	MTPAAHSVALLAFGACVAAQTVTITATVTAAATPTITAVSDCHPHGTVNWCMVGTEEYQISGPTATEEFQAQYTDCHKHGSDTYCVDDAGEDVEIVMENTEETTHAGETAEEPAGSEEHCHFHAGVEHCVGGSEEVSCDATDRDYNIPLRVGLLFVILVTSGFGVFLPILTTRFNIISQTNIIFVVLKQFGTGIVLSTAFIHLFTHAGLMFGNECLGELQYEGTAAAVFLAGLFLSFLADYLGARFIQWRQKKHAGSDSEIRGSPTDGSDKAVSASTSPENEFNRSDGLPHAHGAIHNTTPMEEKINVYNLEAGIIFHSIIIGVTLVVAGDSFFITLFVVILFHQMFEGIALGTCIAELPKAAASTLQKCIMAGTFAFITPIGMAIGIGVLNSFNGNDP…
g1098.t1	MARFTSLMLLGAATISASPLAARQATTVTVTATAEAPASTAWDAGAVHDYPIHASCNATQHQYIKNGLEETLTICRQARDHILRWGNSSEIYQKYFGNAPTGEPIGWFTKIVDGDKSDVLFRCDNIDGNCGQEGWAGHWRGSNATSETVICDLSYELRRPLEGMCMFNYDVANGATNFYWASDLLHRLLHIPKVGEGIVEHYGGADEYPGVLELAKSNPAEAVRNSDTLQYFALEVYAHDVAVPGVGCPGHYREVSSSDSHAAPTSSASAAASSVAASATAAASSASQAASSAAASATQAAEACTPHDDHWHCPPGVPEPTSPPS
g1099.t1	MANVPIIAFDYDLSPYAQKIRDALAASGIPFQRSDQPFVLPRPILEKLDIQYRRIPLLAFGKDVYCDTSLIIDELQARYGALPTSQADKAYEIFGVQIFNSVLNVVPTVALTPEFIKDRVTIFPALNNPNFGELRPSGLAEMKAKFQIIENDFLGKSSGPFIAGEKFGLADLHAGWAVGWSLKAIGLGQEPGFSAQDFPRIYKWVSSWPTPEYKDLSQEDVWEVVQNAEYTAKDIGVNEKDPIGFKAGTHVTVESGDTEPGAHPQKGKLVGLNDKETVVELKNGIRLHFPRIGYVVKEAKAAGMASRFGR
g1100.t1	MATCPVVGTTNSVLPPNHPEVDLNVDGQTCPVVGATTDHHHNLDKHPNIPGLASTEATACPALKSALNEPKAQELDDGLCPVVGTATTVLPPDHPNMLNAGPEDICPVTKATVGHHKNKLVTHPSVEGADKDAVCPVTGQGH
g1101.t1	MQTLENGAVGVLLSAALATVTAYALYTVIYNVYFHPLARFPGPPLAGATAYWKAYVECVANRSFCHELVKLHAQYGDVVRVGPDELHFANPEAYNDIYNNKNRWDKEARLYKSFNEDRSSFGFLTYAEAKNRKDVLNRSFSQTAINSAEDLVLEQTKALCAAFAKQSKTSKSADLHFAYRCMSMDIICTFCFGKPIYAVDAPDFEAPIVVAMDASLPVFLRFKYSDLYKNMILKCPPKLSKIISPSTAGLVDLQQLLLRQINDLTNDPEKLKQLPHSMTIYHRLMDVEAYRDKTIPSAGSLYEEAQALMFGGADTVGNTLMVGTHYLLQHPTTLQKLKKELLAAWPTLETEPNLRDFEKMPYLNAVIKESLRMSSGVVSGLLRVVPPAGAVINGITVPP…
g1102.t1	MADPETQIAIDSDADSAYNDDDASETTSLKSAVLSYKYRNGRRYHAYKEGSYWGPNDEEQADQLDIFHHICLLILDGELNLAPIPKNPMHVLDLGTGTGIWAIDFADKYPSADVLGTDLSPTQPSLIPPNLRFEVDDFTEPWVFRKESFDFIHARSLYGCIADWPAFYREVLDHLQPGAYFEQLEMSVVLKSDDGSVKPDSIFEQWGEISLLLGDKFGKTLRVVDEAKGNMEAAGFVNVVEHRWKLPVGGWAADRRFKEIGQYNKIHWDQGIEGWSLYLLTTVLKWSIEEVQIYLAKMRTALKDRKIHAYQEVSLVYAQKPPHP
g1103.t1	MDDTAMNNFMPLIIEMMRNPPDPKMPLPLINHLGVAIGVSVPFLVGSQSIPWSGGFGLTCTGIELHCSWDDAFVTIAAIFNLIGQITFLGGIKNGIGQHLIYILDTLPETMKWFYVANAAYTSTTVCIKLALLCQYLRLFRKNYRRVITLTLLAVVILWGGSFTFMAWFPCFPISGFWNKTMSPPAKCYAFGYRTTVEAKSTLLAFAGSNMSLDFIIFLVPLTEYFQPNLKRRQVLAMTGLFVVGLIVVLMAVLRLWSGLKYNNRGVIMYDYTFWLPEVLAFSCLEVDFAIICASMPIFWPTVKTAWSQITVTREIIVTNELRFIDTDKHDLEANLERTTSIQSYESTEGLVNGENMEGKTFYHEPHPRPRALMIPPLEQTARMSWGGTILGN
g1104.t1	MSPRNNREEILVGLRKSIDSGQIIVGAGAGIGLSAKFIEQGGGDLIIIYNSGRYRMAGRGSLAGLMPYGNANDVVLEMAGEVLPIVQKTPVLAGICATDPFRSINKFLVQLKDLGFAGVQNFPTVGLIDGTFRQNLEETGMSYDAEVEVMREARRMDLLTTPYVFNVEEAKKMADAGADILVAHMGLTTSGSIGATSGKSLDDCVKLIQEIRDAAVKIKDDVIVLCHGGPIAKPEDAEYVISRTRGVHGFYGASSMERLPVEEAITNITKTFKNIKPGSLT
g1105.t1	MARVVLLGTCDTKLDELLFLRNVIREAKVEVMLVDVGRSPTTHESITIPQTDLLRRYGNGDDIAKKERGEMVETMAKYATKAVKSLYDERFIQGIVAAGGSGGTSIAATVMRDALPIGFPKLIVSTIASGDTGHIVGETDITLMYSVVDVAGLNGVLRNVLSNAGAAIAGMALGRTAGSWQAESATKKRVGITMFGVTTPAVDEIRKHLESRYDIETFVFHATGHGGKAMERLIHEGRIDAVLDLTTTEICDYLTGGVMSAGPNRLEAAAAAGIPNIICVGATDMTNFGPMDTVPERYKDRKLYEHNPVVTLMRTSKEEASQVGKFIVSKLKSYAKDPNAVQVWLPKGGISMIAIPGGPFADEYADMAMFQVIEDGLADSGIAVIEDSRAVNDAGFARD…
g1106.t1	MFNLIFGKRMQQSRKEHQDYAASLAMARIQGKEQTDRRDFMDFILSSRGNVHFSFNPVSFVTGNKRRSPILIAGHSIPPATCVGVYQLSAYHSPLNFHDPQAFRPERWLPEVYNDPSSPFHSDRRDVHKPFPLGPRDCIGRNLAFHEMRLYLALVLWNFDLSLEESMEQWHVQKSFGFWQKPALRVNVKQQTRI
g1107.t1	MRTRPSRPPPLKLFLDTKMPAHSPISSHFRSRFTTQVRRVLPAYLLVIFLILFFTNSYFFTTPIRAAHHFRRERKYQQPLQSGDSLIPRKIWQTWKTGPLAFEQRDSDSAKTWPAKNPSYRYEVLTDDNALAYVEWHYGDHGFNRPDIVALYRELAITIIKADLLRYLVMYAEGGVYADIDVECLRPIERFIPERYNENDIDMIIGVEIDEPAFAGHPILGSKCKSFCQWTFAAKPRLPVMMRLIENIQEWLHDLSREKGVPIAQLELDFNEVISGTGPSAFTKAVLEQMTAQNHGKQVTWDPFHNLAESKLQNRILVLNVEAFAAGQGHSDSGNHDSRGALVKHHYHASGWPSRHPRHSHAMYGEVEHCNWNPQCVAEWDKNVAEWDTLDKEEQEKRL…
g1108.t1	MPTTIEGPLDRLEGVQSDSASWRPVRATRWSLDVVRPEFLSPRPGNPKKPLRRTAWLDGLRGFAAFIVYLHHNQLWSHDIHGNSVFENSFGYQGRHYFAALPFIRHFFSGGHFAVAIFFVISGYVLSVKSLGLIQKSQHMGSADGVGSALFRRWLRLYLPVMGFSISWMMIRHWTDVWVDFGERRSSWSEEFKTWYFSFKNFSFVFLTGENVEFTKNYNGHLWSIPIEFKGSIIVYTVISALSRCTRNARLWCEVALIFYFLYVVDGWYGALFMGGMLLCDLDLLALDDEEPRILAKLEGFKEFIFFHLFLVAMYLGGVPSCESPDGNRDLLASSPGWKWLYKFRPQAVWDVKWFYLSWAAILTVASIPRLPWLKRFFETRFCQYLGRISFALYLVHGT…
g1109.t1	MKRQRHILVATVLLLALVYFFTQHGFSPLNAGPGKLRTEISSDVQQAQDLPKPDSSHEGDRSRLEPLSHDAPGSGNLPPTSDIPPSRNAPSVPASGDIPSPTTESPGTPPPLIDIDFQKDLNIDLPVDIFNSLGGYKPHNYIPDGDGTYAYATFMASRNPSIKDPYYLAIHSLIYRILWSPRSKTSKHPFIVFVGDFVSPSQRRLLAGAGAIVRELAPLPWNPADPDVLERWKDLFAKLHMWNATDFSRVLFLDADAFPIAPIDAMFDKTKPGSCIESKLQLDDFLMPAREPVCEPYIFAGVPADPHSVFDANVNVGSMVFTPNSKLHQRLLQNYLKFDKYNVKMAEQAFLNWQFGINSAYPPGLLDREYGAFFPNEEEHKRLRVVHEKIWAAERGWMK…
g1110.t1	MADIKKEGRGIRIAIDRGGTFTDCVGNPGSGKMEDDVVIKLLSVDPANYDDAPLEGIRRLLERFTGAEIPRGQPLDTTKIESIRMGTTVATNALLERKGEAMAMVVTKGFKDCLEIGNQSRPNIFALDIRKPEVLYKQVVEIDERVTLEDYAEDPERNNTDAKSIEEAGAHAELVKGLSGETVRILQRPQEDAIRKQLQDVYDSGIKSIAVCLMHGYTYPHHEALVGRIAKDIGFEHVSLSHALMPMIKLVPRATSACADAYLTPAIRKYIDGFSKGFEGGLGSESVKREEGAKGARCEFMQSDGGLVDVDIFSGLKAILSGPAGGVVGYALTSYDPETKTPVIGFDMGGTSTDVSRYGAGRYDHVFETTTAGVTIQSPQLDINTVAAGGGSRLFWKNG…
g1111.t1	MPPTVDAYPGFQKTFICATLASTLVGTFTASMGLWERVHDRREAHKQKQTDSKQDGEIKQLREQFEAAQKKGQERQEEIDRLRSGGGGRGGGGGGGGGGRGGGYRDDVGESFEKNGMMIQRMYDDMYGKMGNRFARGDAITENQLQAQIIALQQTVITVLQDALYNDRQLTRSDMAKLVAASNSAREGSLRALQDQQQRLSSHSSNRSPSPQRSIAAPPKRSSTSLVDASDQLFCRYSLDLQYVPNKPLAASMAPGGSCECPACGIRLDVTGEDFWMIGKRTPLTIIEKGYETDIMETREFCLGQRFAVKCHTPDGEYACVICSKNRDVDAICRNVESLVKHVGTYHEVEELEREVDLRETVVVDKRRLSLPAPPREGSLLIRERDVVDMRGYR
g1112.t1	MGLFSKKTTEEVAEKGTPETSTPAETPARTVSPTRDGAEIEPKGRVPAVAVILGATASIGGFMFGYESGQISGFLQMPDFLERFGDNGEFSAIRQGTIVGLLCIGTLFGCLCSAPLADTFGRRLVISGSAFFYIIGVIIEITSERSWVQFAMGRFTAGIGIGALSTVVPMYQSESIPKRIRGATVSSYQLLITLGIWTAYMVNYGTSKDYTNDAQWRIPNGLSALWAIILGSTILLLPESPRYAYRMGRTEEARMNMARLNGVDPHSAFIDNEIREIEEKLQAESAGGEHPWHEIFTGPRMLYRTLLGMVLQAGQQLTGANYFFYYGTTIFSATGLKNPYVTSIILGTVNVVATIFGLWVVENVGRRTAMMCGAAWMFMCLFVYSLVGHFVATSIDGVT…
g1113.t1	MTHMLVLLASTIFFTTLATTVAAMSVTYDISYSTASALTLDVVVFRLLELFSLFVRGFFDFLQHNLLMPRWAFFMLVIAFVLRSAPPHVVGKLGDALVAPTKSFVHILRLYLDHRQEANTTIITLQKRVADLEEGAILSEKLKRNMIKREIFDSTLAFYDGMIAELQMNTTRLECRLKTSRNANIALQKDYDAALYKNTLLRSVCNAKKQRANEASHKAEMVRMNQVVVDCTTQIIELESKISSLKTRHSNEGRDRLAYHKAQREFQGLLNARDITIDLRNANINSLEIEVQSKNTTIHQLEKQVIMFNNLKKLLLCLVETGDQRQQIAVVICVAYFLSCGIDVTELGIDPLQLQTYSDWATMVINNCPSPLAPTEGLRLKGIRYTLSRSFVRDGQTFA…
g1114.t1	MVSPAPSNCTPTNSSAVYQQANQLKYVNRQLHNEIKALALHYNKLSFHILHSTRSPLCLCALPLRLRNKTPRADKPPQPLAPSRQRSSSQRKTAPQPRSSTLSPSPTPFPFSEFTSPFEYSARTPWPAGSSLRCTCALIGGLWNAALLIHACADCC
g1115.t1	MLVRRHVPRLESTLRARTYAHVPPHAHAHAHAHARAHAYALRPLLASQCTRPRFSSTSTAHPERIAVLGGGIAGLSSAYFASKEFPNSNITVYESGPDTGGWIRSKKVEVPGGHVLFESGPRTLRNATPTAHLMQELGLIDDMIFTKRTEAGAKNRFIYYPDRLNRLPSEAPGIGELFSLWRSGILDGSLGMVKEPLQPKRSVSLSDETVGSFLERRIDKRIANNIISAVFHGIYAGDIWQLSAKTLLSMAWQLEGKYGTALGGFFRMQSEQQNSHQQVIAHPYDVEVARALNSDIDISLELAKNLKEASMFSFKNGLQTLVKGLQDAMEKTGNIEIKVNSPVASFKMAEGQEQKVEIIAGSDANKTIENYDVVISTLRNASLTPYVTVMTVNLYYDNP…
g1116.t1	MADFSPESPLAAQLQQVVQPKLAENGWTTGGDDTTLFEYILLMLANGKDQSQVAAELSNDLLDLGPENTETQEFAQWLFGQIDLLQRQAAGGNAQSAPSADQAMDGGAPSFVPGGQDTDMDGVSEAQEGIPTGPKAMRNGSGAPSARGGPRGGRNMLNQVNRQMNRNDDPLHRVRGGGGVGRNSRDPPRGPRSQNLGRGVEAMANGRGMNSVGNINGAPGPMNGMNGMTMGGMPGMPMGGQNGGMNGGMGLNQQQQLALMQMYEQQAQMMQQIFSGATPTPYVNPNFNSNNKNRGGRGGRGGRGGRGGQHQQGMHQSTKFTKKEGQDDAMTDGPTGEKGDGMEVENTRSEPSATMCKFNLRCSNPDCHFVHQSPAAPPGAPVDMDSTCEFGAACKNKKC…
g1117.t1	MPAVPELLNAIAQLGNVAPRAYGSDSLLPHGPAIDVAAMRQDAPRTIPIAKRQQMVVQQGIIPTYYNLSGPQPGTVVGIVLGSVGGFLLIVWLLYSLTNSNGAGTRTTMAGEEEIVVRKRRNSHGNRSRRNSHAQMREVSRSPRQSSGRSHIIVEERRQPPPPQQRTRSIIVEERRRVPNDDVVEVIEEHDEYRERRGSRRGGYR
g1118.t1	MPNEFLCEIILSIHGEFSKTLRSLCLTCKHFRNVVEEHREPEYNLRGKWNDDLYAMTERLRDQPRLKHLIRVICMVYDFAIHTKYTEEEVNNLVTPLGSTRLMLVRSNAGVRFLHETTEAQSG
g1119.t1	MQLREKYFHSPLKLGAATKLGTDPIKQAAPFMLPNTNMISHSLYTQSALKFGEWYGRIILFPVLDEMTSRNEKYARSEIQLGTDPSYHPTEDGSVVWDKATVPYQTIATVEFPPQDALTAKRRTFWEDKTELNPGDALTEDQPLESISRLTKTVYEISRKNREAINATQTKRVRSVDELP
g1120.t1	MNKMQQHNFKQHRHSFRATHVKTQGIVKGKPTILTDLPPTYNKDSSRPQAKPTTQQLAMQASPCSYKQIKNPALGDSVYVFSASRASASRAQTKTQQRKISSSITRP
g1121.t1	MPENTPLLGQSRNGNGKNELSWSQRLRHFTWSWYEVTMSTGALATLIGQQPYKFPGVDAIGWAFAILNIVLFVVFTGCIVYRFSTGSGRLSRSLHHPHESFFFGAFFVSLALILYCVDLFVVPLCGEWLLTTIMVLYWTYAGIVALVAVLQYHIIFDRIKLPVTNALPAWILPMYPFLMLGVLGSALLKSQPSDAGLPIFIGSIAFQGLGWTIAFFILTIYVTRLVNSNLPVPSKRPAMYVAAGPAAYTANTFVVLGMEAPKHIPKGFLDIDSIPVGDVFKVVGITVGIFLWLASFWFSALSTVGVLISLKESHFTLNWWAFIFPNVGLVIALLKIAEALKLSSVQMICSGATLVLTLAWVGLAIMNVRALARKEVLWPGQDEDMEDIDGSPEDMDGER…
g1122.t1	MPKKHAPAYTQARPSYVHPSLQSSRASSSSTPSEPQTVNQRIQHLRREQTPRATPEQRDELTSVVSSRTVPPDLRRILHIPEVNAPKPKPGLRPRRAVGGARPPPGPAAPTSWLLSSRHAPDYARKMRGQQSSSERSAPRFCMLASVTNDKYKRLPPNRSLAHHCLRKFALHWEELSEFEQHYIPTIPMALREALLSYMGAYGPKACLDFKSFRILFQNEEGTGTSGWDEICFMDLTGLLNEAFTIGDVGKCLKRQTMQLPAFEDLQIEEATAVKGKGKAVEVAESWEEEDEAEGPATAQPVPTAALMTPFFTNLSRLSLAHPGAWASWPELLKLSPYLNKITHLSLAHWPRPSTTPNAATTSMVSNITTVSLGGSHFYSDLDDDWHEATNILRRLSVN…
g1123.t1	MHFSARVVTGLVAFIAITILYTINAVSARDPTSFFFNPRKGYAARYSAIRRQQAEDFLQAYHDAPSHEIVKAGHERNRKLCVGIPSFKREGVHYLRDTVGSLLEGLTPEERQEMYLIVFIPHSNPNVHPEYNEAWLPGLADQVLTYEFGDDQMQHIRNMERQGGLYVEKALFDYRYLLSACTEQFTPYIAMVEDDVVAMDGWYHRTMAAISEAEQQAAERHARADFLYLRLFYTEEFLGWNAEDWRTYLYYSLWVASIPTAILLFVRCARPTTKLSLTITTPRSVATIYAVTGASILIFFGMGRNTVLPLPTGVAEMSEFGCCAQSFVFPHLKALALVDYFKDRRLGFVDVLTEDYANERGELRYAMTPGVMQHIGKKSSKIDDYGPQSKWGRSVAEKI…
g1124.t1	MGSELPSIRISPASPATTSSNDTIESPTKEQEEPSDVSYLRNWSRGEDYEDLDDLLRRVAIKHEDQGHIESFWSSQLLAAVMTRERILEELIRLKDGFGERAIGSLADEISTGCRKIFAILSLLGRGKCVVGFMHDNIKDTDLPLVPCIKGPDRRHVLARKTVPAVPLRCLQDWPTNDRKSFKEMQYRTSPEFLDLATGPNTSRREIQHKEFKPTAIIPLMESQQREHGGYGIVSRVKIHPHCHGFCDILKPIKTDQYFALKMIIKTPKAKQTNSEIEFWNEVNSLKRFSGFSHEHLVTLLMTWTFQDHYYLLFPLAECDLDQYWERKTIPTDSTNRLLDSKTLSWLLEQMYGITDALKHIHDPPENNLSIQDRFGRHGDLKPENILWYRSATHANGIF…
g1125.t1	MIHRNQYKAQIWSLETHSEWRDWLEKQVDCCDRGLVLILARHAAEQPVFYDGSQPTSINDWLTHIQSDAAPRHCIRRASTFAQFCEKQSVSRESTSPTLRQGSAKDLPFSKKTFECISEKLQIHDSILRAVSRTDIPTFSCEKVEMMQRSAFVYNCRTPNSWESDLALSSTYFVDTGCTFAVMYGCSLTTERLVLRKLCTVEEGVAHPLLIPGLLTELELIRHTRLVESSITDVETRILDLNIQAETLSSFRPAEIERRNQAKRSAWLDLTYLRNSLVTWTEQLQKMIDHAQVLKSGYFNESFETFDIGSPQQPDNKSAQCIELTPPRNSTAFMIDDRQQDTDVRSVSQAISYSERQYRYSQEPSDIYRPTSTCNGTCNLPDAEIAHAQQMRTVGAKIA…
g1126.t1	MTHADHENSDNEPPRAHNSCLDNNQDVRSDGFRDTLVPAEFTASESPTPRDKAVLIPRPGFTSNGKTDCFQPAQTRFKNNAQLDAGWITNTCADVTDEDTVRSLDDALHDGMIASAGDNSPLFLPRDKLKSLITLETIREELDRCTPSSNTLETARIICEGKFPRRKIFAILCMMSKVPEIESFIQEKVSDIDLPLLFDSHPKKHVFLRHNRGSKNKPQTPLALFQGASWKNIDRDHFRNLQWQFLAPYFSLNFHPNQRSRHWKLETQQILPFVKDKPNMGIEFAAGLREGGFSFVRKIIIHPAHYNHKSNNGSPCFAVKELKSRPDQGLKEIQALLRFDEQPHDHLIRLLAIYEHRDRLNMIFPWAEDGDLENFWKTNSLPPCQNHEFAMWMSKQMLG…
g1127.t1	MFDLYLLTFNCARTLADPQSLAPSFFDALPKGAPVPDIVAISLQEVAPIAYSFLGGSYLKPYFDRVTTTVQLAADLHSQGSQRLEHVATRSIGMTALMIFAKPSFTQRIQWIQSAGAGVGFSNMGNKGAVAMRVGVSCPTSASEETLNLSFAAAHLAPSEKNVDARNKDWENLVRNLVFVNHDDSAYSSSEERPLPSSHKAPGDKNGLFTAGSHVFFFGDLNYRTHDASPDEDAHRSFPSMTAAESSPKHFSQLLSRDQLIREKEANRTLHGLEELPITFPPTYKYSTSHNSDNEWQWAKHRYPSWCDRILYLPSHTSKLEPQIYTALPVQSTSDHRPVALSVRVDDKPIPAHGSRVEAPYSINPEWKSRQEAARRWEIMVGAASYLALTKKGNAMLAA…
g1128.t1	MFRAQIGRQVARAARVQAPRAAFRPATASVRPFTSSVSRFDKSTEGDHDAGSSSAAPGESGDHEGQFARTREDIVVEYPEEKDLPPSQPVQGRGGFHFKRTLATFSMEGKTAIVTGGARGLGLVMAQALVTSGADVAIVDMNKEEAQRSAEGLIDLFKKENDSGYTRLPKVTAHYCDVSSPDSVNESFAEIVQTHGKVDNLVTSAGFTENYDAISYPHDRMQKLWGVNVDGTYLYAVAVAKHLMERKAPGSVVMIGSMSGSIVNVPQPQAPYNAAKAAVRHLAASLAVEWSHAGIRVNCISPGYMLTALTKKILDDNPELQKQWTSLIPMGKMGRPEDLMGAVTFLSSDASLELGRPTPTPTPTPTPTPTPALAILPIMFNLGNLVQKAQQLIEPTLST…
g1129.t1	MRGSSPTRPRAHVVFQLIHANSVISHRQRTILTYEALDRDSNALARGLQKRGVKKGDRVAVSLGNNVEFATTTYALFKLGAILVPLNPAFNAPQVLSALNHLEAAHLIIGAETNLPRKDPRSNISLLTHLVPNLTGANLESELVPSLRNVIMVDNAQGRIDCAVYKSATRYEQVLEDGGQGSALDDQGLAPNDTVNIQFTSGTTSMPKAACLSHLSILNNGNSIGDRMLLTENDRVCSPPPLFHCFGCILGYMATATHGSAIIWPAEAFDPLATLEAVREYKATALYGVPTMFIAELDLLAHGAVPKDGFEHLRTGIAAGSSIPAELMRKLHKQLNLTELTICYGMTETSPVSCMTTTDDPIEKRIDSVGRLLPHVQAKVVDPSDWSRTLGIDERGELA…
g1130.t1	MVYTIIVHLYAKADEESISKLKAKLVEASQVYSKDKETLSWFVMQDTVDPRKFSIVERYQQESSQQYHLNNPYWKTFDPYVLPLLDAPMDLRRLEEMDTSATAASAHYHWDALKEDTTVASMYKDAN
g1131.t1	MGHQSQLLSSSEAAPAYDEHGFNHEHPVNAVPSSGPASAYATVPQNESDIELAHDHTVPISSNVQSSFTPHQHCETCDTLTSKRKLRANERHCCMWTSIVFMTISVALLLLGIVAVDAKYKHRRE
g1132.t1	MKLLNLVSGLLCASSALAFKRPTKHSLPRSVVEKRVANQPFSHPEIQKRASRFLTNKTEAFAVNGSGIPEVPFDIGESYAGLLPISDSPDETRKLFFWFFPSTAEQTPEHVTIWLNGGPGCSSLSGFLTENGPFTWEAGTLAPVQNPYAWTNLTNMLWVEQPVGVGYSQGIPNITNEVELAAEFRGFYKSFVDTFQTKHWKTYITGESYAGFYVPYIADGFISANDTEYFNLAGISINDPIIGDSTIQQQVVILPFAELWQNLFYLNETFLEQVRDLQVHCNYSSYLDTYFKFPPPQGPFPLLPNPYTQAGECDMFDTFTDAISEINPCFNIYHVTETCPHPYSQLGIVNGGDYSPPGAVIYFNRTDVKEALHAPVDTNWQQCTDKNVFGNGDIFSYAS…
g1133.t1	MIRTITGRDLCELFDAEARRHLEHDIDVPSLPTAQGSVIMFMNSAYFGRDRAGAVYRHLGYDMLDRLAIPARLSQISDPEEKRAYCRAVWGVYCYESILAALQNKTPALRKPTVPRLFHEQVEPSGPVENVDLFGQAFTSASPRPQFAPGVLSAACDLNILQNEIIQYNEDLLRSGNENDLTIRKGLYNKVLAWRKSLPNHLLNELNYTPGTSLLRVHYEEVAIFALRFLHYKTNFIDHTTVDELRVTHCQRIVETVEHHFNTHLPGHYSAMFLNALYHACITLIPSLDDPLSQQIFTRAAIGLRREPLDLPGLVFPIRGIEAVARGMKKRIPPAAKASFIAIKEPIDTGDILIEYGFPSKLEYVQNGPEDASKSDGDTRGRLNALIHRWNALTL
g1134.t1	MSHLHGHTCIPPANRLMCAMCDHEGTRCKGCLEARYCSQDCQRTDWPVHKPVCEAYAEFSDVRRLSEYHKRALSFAEVDNLPRFVWLEVQPRADDDKANGETGEATLEDRVLVPQLKLYLGTLNGFLSQGGIEKDEMSNTVLHRKIGRGITVAGRLTNNTDSLPGNHQVNKSPLAIEKEPLEIWFGDVVACGFTEDTKRIQDLNLMDFRHLVDIIGYIYDHTRRECNEKFNSHRRIHPCAAEEKLGCRFLGILPTSAAQFDAKSEVATPIMTRIGIPLVFRRLPPETRGRDRKLGLPRKLIGWNPTLRPFDPTIPLCDWRHGVGKALVVRKDGKPLCQTYVAAFVDYVHKTVSYCHDNRETARGVLDSYTKGDFMGWYDG
g1135.t1	MAYAQNNHKVAIPKIDRPPPPPKGPDRNREDRVTRACKTCRKRKVKCSGDIPRCLNCQISGLKCIYEQARRDRLKEATDLNHTFVALFAELSAKLSEEDRRRIQDVIHTAEDDMMQPHPTPSARSLGKRVRGSSFNSSSPDSKSPVKENGEAQVTASVGSNEDLDFLDEDLLRTRQSRETGYFGQNSEVQWLRTFQRQVQSQDTEPCGLPYGPPGASKNAAEERSEALHQRRERSYTSTRHITDATFYLDSDSIELDIIVNPYELPTPGIAEHLLNCYMSTVHSSFPILPSSFEDQVRRFIESLMENRPFQVPDRWRALLNLTFAVGAKYSHLIGADWQGDERDHLMYMTRASHLLGMHNTVMLISNPDLSLVQATAILSLYFLVIGRVSRAWLMVGIS…
g1136.t1	MRLKLLSFYLVAFCAGLAESTPRSHTILPRPDIKPAPFDAGHVMPNSPLRHPKRRCFVKQGAVPDRNDAHAIYHAFRECNNGGTIILNETYHIGSPLDLTFLKHVDVVLTGEIHFDDSDVYYWAENSFKYEFQNQSVFWKWGGVDVNIYGDLSVEGSIIDGHGQAYWEEIRTNKSLFRPMLFAFDGMKGARMSNLRMRNPPHWFNIIANSSDILISNMDLQAKSLNNVTIANSDGWDTYRSDRVVIQDSVITNTDDCVSFKPNSTNIVVQNLDCTGSHGISVGSLGQYANTTDIVENLYVYNVSLSDSSDGARIKVWPGIATNFQTLLNGGGGLGRVKNVTYDLFRNVNNDRAITITQCYGQKNQSLCYEHPANLTIEDIKIKNMFGTTSGKLDPQAGS…
g1137.t1	MGYIKQITIQGFKSYKDQMQIQPFSPNCNVIVGRNGSGKSNFFAAVRFVLGDDYNFLNRQERQALLHEGSGSAVMSAYVEVCFDNTEDRFQTGKPEFYLRRTIGAKKDEYSVNRKNATKSEVIQILESAGFSRSNPYYIVPQGRVTALTNMKDKDRLEMLKEISGSNVYETRRADSLKLLTDTDSKCANIDSVVESINERLGELEGEKEELEAWSKNDRERRSLLYTLKSREEAQLETQIEHIDSLEHHGREMREDNEATFRRNEDDITRLESDINQRRGDLDILRQDRVQYESDRKAATLEKAKIQLDIKALQDSQSSAQQTKSRRDAQVKTLQQQIAARQAELEQLLPQFDAKKEEEEAVRAQLLDAEGQHKRLQDKQGRTAHYSNKRERDTALRAQ…
g1138.t1	MTEVQHPQSFDWANDAYAAFSDQAKPQNNWAAFGSSSSTTDTTAALTIPPALLTHSAERFGQITPPDERSPADSVRAARDSSIPVEELMNEALWPQHTLSATEHRPSTQAELQQSQPPSQNSQSPLKRRHASRQSASSQAQASASTYQDNDATVTLQPPKRKRGRPKSQPQMVEAYTADGYPFQVSSARQSHLEKNRVAAHKCRQRKKEYIGGLEGRAREFSAKNKALKESVAILREEVLGLKNEVLRHAGCGFWAVDEYLARCAGDLLGMQPPDASAGTNTLQHHVSPFMHQIRPRQDSHDSIHSLGSMSSTPGADGFGGLELLKDYEDDVDDQS
g1139.t1	MRFSLATIATAALVFSASAAPHGGIGKRGDNTDIEERGGKGAVRGRYADGTFLSGALGSRGATDPVKGLLPLSSPAAFLKVRKDDSDSSSDSSDSSDSDDEESNSDKEAEEEGDSSSDDSSSGDKETSSGSGDEESSSGSGDEESSSDSGSSDDQDSSSDSDSSSGSSPSGSSNSTGSSTPSSGSVASGTFPTAAGESTLSAPMEVTDFDGGMVKFGRGVSCTSGEGGGKDAVFNVADGGSLSNVIIGADQIEGVHCAGACTITNVWWEAVCEDALTFKGNGDGTVSGGGAKGAKDKVVQHNGIGSISISGFYVEDFGKLYRSCGNCKEQGERHVKIDGVKASGGSATLVGINSNFGDTATITNSCVTGTKVICQEFEGTSPGNEPQKISDGPSASCIY…
g1140.t1	MTSSQASQSGSVSAKAIMRAFPAFSTHERNAEMSSYTYIYNSQLDAFSLYHLTHEQATKHSTLGPALPALGHATSGALGTAISKLITYPLDLVVARLQVQKQLQGENERPRYDGIFDAIEKIYEREGGLSAFYNGVPHEVFKGVTDSFLFFLAYSYIRQSRLAANGGRKSLGAVEEIGVGVVAGAFSKLCTTPIQNIVTRKQTAAMTALDGNTATPPASSTRDIASQIKKEKGLQGFWSGYSASLILTLNPSLTMLMHKVLLRLLVSQGKRDDPGARITFLIAATSKALASTITYPFQLAKTRAQVSSQKPTETTGETSEFEKTEKPPRSGVMRARQRTVFATILRIAQTEGLAGLYQGLGGEVLKGFFSHGITMLMKERIHAVIINLYYAVLKSMEKF…
g1141.t1	MVGGETPSSPPPRSGGWGSLREELDYYKTAYETLDAELQEFQSSSKELEAELERDVEESEKRERKLQEKVERLGFEAEEWKTKYKQSKTEANHAQNTLQKEITSLRDAQRTLQLKLRDMEVQNDDFERQTRNQSSSLEDVETKYNVAIEREVMLEEEIKIGEREREGLRIETQRLRDELSDLKIESDITQEKLRLAEATIEKHHQRTVSNQLAKDSSTLRPRSPMSEASTTTTNLSSPTAASTPPYMQPDALRSDSTPPSPPLSDAPLAIRPIPFTPLVPTRKASMAPRDPAATPRAGAFTRPRHTRGPSVSGIPAQGASAGGRRTPSVMRPPSAVPGQWPARPSLGGNTPAAGLPRSGSLYQIRGLIGKMQKLEERVHSARSKLPAPTLTPPRASPRA…
g1142.t1	MASAAHHGATGSDANGAPSSYAAQFELAPHFIGGNQLSAAAPGKVKDFVAANDGHTVITNVLIANNGIAAVKEIRSVRKWAYETFGDERAIQFTVMATPEDLQANAEYIRMADQYVEVPGGTNNNNYANVELIVDVAERMNVHAVWAGWGHASENPKLPESLAASPKKIVFIGPPGSAMRSLGDKISSTIVAQHAQVPCIPWSGTGVNEVEVDSQGIVTVRDEIYEKGCTKSWQEGLEAARKIGFPVMVKASEGGGGKGIRKVEREDEFEQLYKAAASEIPGSPIFIMKLAGSARHLEVQLLADQYGNNISLFGRDCSVQRRHQKIIEEAPVTVAGSKTFQEMEKAAVSLGRLVGYVSAGTVEYLYSHADDKFYFLELNPRLQVEHPTTEMVTGVNLPA…
g1143.t1	MEISSNLPQKLTAAMAPSSTSANTNQNDPLQHPLQATAMAIQGAVQGEGRAPRMSHMASANEGPADIIAKVSGAVQGGKREDDGAYFTNNEGIPFPDPAHSKTIGGIPVASDVFLFQKQQHFNRSKQLERMVHPCGSGAFGYFECTKDVTSLTKADFLSSVGEKTPIFIRFSTVTPGREFPDEARNPRGFAIKFYTGEGNYDVVGLNFPIFFCRDPIQGPDVIRSQYRNPKNFLFDYDGIFDLLGCTPEGNHAGLMFFSDHGTPKGWRFNHGYGCHTFKWVNAEGKFVYIKYHFIAKHGQKQFTQEQATQMCGEDPDYSKRDLWETIENGEEVEWTAKIQVMEPEDADPDKLGFDPFDVTKVWPRSQFPMQEFGRLVLNKNPENFHRDVESAAFSPGSM…
g1144.t1	MSSVRAFASPVARAAFRPQIAGKAGNMRAFATSRIIRAAALTEAITSDHRELEKLYNVIVNSKDVEQQTRYGNQFIWELARHSVAEELIVYPAMEGMGEEGKAHAERDRKHHHTLKELLKTFQNMSAQDSEYVPQLKKLYKHLENHIKEEEKDDLPALEQALTSEKNRGSSESLAKSFSRTKMFVPSRSHPAAGENPYIEGPAGLPVAIFDHIADLFRKFPDGTISPNPSQK
g1145.t1	MSSPNCDIDATLPHAGLLSYFRLHHGVDNCDRSAQTICTESSFLSDMKHRVFDEEAQRNSWDADSTTDTECEDLLQPAHRHYQGVFHSVHDLWGFVCVVTLVSCAIYLGLDLALNQYGLGMGLIDRIRGGRLPPSPIARELHFCLSSPNREAPGPQTWHLMSSRQHRECTTEVVTLLATPTEVWKLRSDDDIVFGNGQRLRQDSIRVGKFLGIEDVLSRMDLGDNIAEEGVLSQSGEVTIPRAVVIT
g1146.t1	MALRIPFLGRLHLREYFALVLSILLIALESVIAVITLALPTPIINACYRITRRLFNQLSSPSSRRSRDRKKDVWSAVANAGDFTELCEIYGYYCEEHIVQTGDGYLLGLHRLGWRRGEEGERVNAGPGKDGLKKKVVYLHHGLMMNSEVWVCLTERERCLPFELVERGYDVWLGNNRGNKYSKKNIHVAPTDAKFWNFSMDQFAFHDIPDSISYILETTHQPSLSYIGFSQGTAQAFATLSIHPTLNEKVDVFIALAPAMSPKGVASGTVDSFVKASPDILYLAFGRKAILASATMWQSILYPPIFVRLIDASLRFLFGWTAINISPDQKLASYPHLYSYTSTKSVVHWFQIIRNGVFQMYDDEAPSPINPNRSKYYKVAKFPTRNIKTPIVLVWGGSD…
g1147.t1	MPQSCKDIRAALAFCLQNSDCILVERNSPGDCLRPPLKYTLPTQCQQLQKGYAECKKGMIDMRKRFRGNRPISVQGQLETGAFGQGRAEVDEKAGTIEEKGYMLYAGRPYQAVNETKGDQDPENKGLDR
g1148.t1	MKRAESGEEKATRQCWECLKRRLVCDHTLPHCRKCIKAGKECPGYDEQKPLQWVEPGKVTSRRRKKDGPPKVYTIKSKDREPVVTAVPSLATVGCEDSDKSDSSDIIATDDVAVLELPIFDEPQITQEAADLYKCQLACSLLQEETASWWYSLSAKEQAEHIVLNATKHASSSSVAARIMQIGGKRSLKAVVERGQYWEAALLLQSERQPLEKLRRLLRVMEVQDLPSYEYLSNETCEVVQAVNYFNTRIYPDVKETDSLAPNAAVIHFPVQNSSSGDWRSHAIGIKQLIDMRGGFATLIREASYLTSALVIFVIIVTFSNSLGPASEHINITKSLEDHVQEVEKVYTLVFPYVLCPPSLFVEIIRINRLRQEITASPFEDESQCVLQALDLLARIEAF…
g1149.t1	MSIFIDTNFIRALHPDRTRTELKALRGSASDEKISEVLLDAIERGSLSTSTFAAWLSVCRSPHVIEKSLRQKTSVHIRYLGVKQLKKGLGSAHWEELWDGLGGTSGLLDVIGDLSVLEVRATCKALGRSVKTRDTEHKRARLTELFEGLHPDSFPNAKHKTTDSRPLTKYYQALVPSCNEELVHRITVGDQKEKWKYVRERGLLEKHSSSIGTTLLQSIFRDQSPDTKSKERLQALSTRFPSTTTPEPGFSASMAFAFELLRELVETGSCCMDSTWVVDNLVRPLLRRGVRRHESWSGIQSITALIIRYLNSHPSAAKILTNVKGDVLHMVASCWSRRSALFEVHLKSLLKMVFGSTTRLEDFTNLLVGIPKSRRYPLLQLCCQEVMDINLNAAQNMEN…
g1150.t1	MRSSFNFVFCVSALCFAALVSANLPPTDDVIQSFNVSIPLSESVLSDFLTDGTSNDTITALGYDPSYDYQGWASVEVWTGGSSRKPVNVGELTGSALYHTVYNILGKACPPMNNPRGNYSSNKNWSGFCTKYL
g1151.t1	MLPTLQQKLRIWTIRESRAQHDAQATSGLDVPVADPAGVRQPPEVVPEEFHRHQVGHRDSSPTDPDPPSIDQSQDRPVTEARGPNFDVAEALLRSLDGRVGAPTNLANEAATDGGAKKAQHHWEVDPRGHYGVDKTAEVLKKKYHWPGLMKDVHHYIRRCPTCQLHKIRRHKPWGLLTPLPVPNTAWRHFSLDFVTDLPKLMDAKGNEYDAILVLVDRFSKYVRYLPCTKTITAQRLAELLMEQSFLKQGPPDTLLSDQGSVFTSQFWSDICYHLTIDHRLNLLPYAEYAYNSKAHSAHGESPIKVAFGTDPKGFDGMPNKHWLRKPPAVWDKDGTTPELRRQVAGRLERWHDMWRTAKEALEYTQKGNAWWYNTKRSEQHFAEGDSVLLRAKNLMTSR…
g1152.t1	MGGPADVHRTDAGQTPDAPLAEWSRIMAVGIDGGPIPEDDAPDMEELNKRQTSVLAPHQEYDHSIDIKAGAKVPNLPIYNLSRRELDILQEYLEAAQEKGWIRPSKSPAGAPILFVPKPDGTMRLCVDYWGLNKITIKNRYPIPLVSEIMDRLSKAKVFTKLDLRDAYHRLQIKEGDEWKTAFKTRYGHFEYLVMPFGLANAPATFQSYIHRALGGLLDRICVVYLDDILIYSQNEEDHDKHVEEVLDCLVEWGMFAKASKCVFSSKSVEFLGFVITPDGVVMDPKRRFIFNYLEIVQPLIDHMTAAQRPEEDRGVPGQEEGGAKLKKS
g1153.t1	MKLNKRESLLPRNFAKFDDGTDNYEFKIAFGWLSSATGPLERPRRWQLTVQWKQPGKWEALVANLSHLRLGPETKGKQTRIAVTVQLIDSKGNPKTLRALYDSGSELNLIAAQVAIDLGLNPAGTDQRPNAVVLDDTKLSLIEQYQLTMVCHNSKGTPKTVGPTKFWSTPFVGYDLVLGYLWLAEADLCIRFSTGTYEWFTDDVERVQLVTAEQLFSDLEPGEQPYLL
g1154.t1	MAGGRRNLRLTTSDVEELPPRDDLGQEPDAQRRDNAPRVSPAPMEPPLNPHIRGGSATTAAGIATPDVPTPRVTQMESLQASIPLLLEALNEAELSGAPEREIEIRQRQFNRAVETLQRTHVGPTPGSHRPAFDEAGKIMRVLNNVQPKPKLGTDNKPPSTQQVDQWIKDIDTAFQYA
g1155.t1	MLSVQDSLKLAKMLQPLSVEKSCAPTTESQKLCLSNSNRLTLGYAKSSVYTQKPTGNWPEHFPVSIEFTDGRTTLRPLAIHLVTSRPVLFEEAELAPHSANKNKPLPGNYSGAFEAKNVWLVDFEGFCVANKGFALIPSRIDIVNLSTGKSDTGIIKYNFGHIGSIADAIIASGALPLRADCRRVGGVLRRHYEGTKTSGYTMSMWKFRLLDLGFDPKNDLAVSWGFTNFDRLSMGGIMAENSDFAVRNDHIELKTKHMDLVQIFKTYSSIETTALSFLYRTYIKDDHEHRWHDPIYGAMATKELWPVLRRFTEPLFKEMKKRSMQSLVSYQVVEVDVEMITLH
g1156.t1	MQRLFTPFQAAFKQKTVATLHSRISPRAFTTCARMAAIKDQFSWTPMWPLIINAPMADNSGGLLAATVTLAGGFGLVGSKTDMSVTRSELNIARDTFAAHPEAPQAKSETLNVGVGFLPFVLKLDDALEVVREFKPAVVWLFAAKEFDDYAVWARAVREASPLSKIWVQVGSVASALQVAKQTRPDALCLQGADAGGHGFEKGAGIISLLPETADALEEAKLEHVPLLASGGIVDGRGVAAAMGLGAAGVVMGTRFLTSKEALVHPVVQSSILEARDGGQVTTRSKLFDQLRGPNIWPEAYDGRSLVIKSHKEYLEGVSLEEIQKKHQEALQEEDLGWKTGLEGRAAIWAGTGVGLVNEVESASKIVENVRDTARKRLNLLQSPSPSEWPAHGGT
g1157.t1	MASARRVSGFPTRNPGTNDRPGSRDADKEEIWKPMLDSISSGKRLPEKSLLVLGGTPETQREFLESVSTDGPNGRRQQDRGRKPPIANQFALGSFEPTWKALTSSDTLARLSLYLLASPSPSFTPLIKPYLNPRTVPHMLVVILLDWNQPWLWIRQLRDWIRVLRSLVVSLDDASKEVLHENIAILQDKGRTLGGEGNTSMENVKIPLGPGEWDEPLGLPLCVVCQNADKIESLEKERGWKEEEFDFILQYLRTILLKHGGSLIYTMPSAPGSLQTLVHSTLGIKSLLKQEQLRHNVTDRDRVLVPPNWDSWAKIRILRGNFEVEEISEKWSIDIDVPERMTQANEQSQAESETAADTPSPTSSTSDHTPDTSATAIYEKEIRNPQYDFTLSTLSKQGN…
g1158.t1	MNSVRAIQQLNKRELEAGINPEGSWHTDYRDTAFIYIGGLAFELSEGDIITIFSQYGEPVWVKLARDKETGKSRGFAWIKYEDQRSCDLAVDNLGGATIMDRVIRVDHARYKPRDDEDMRDNTMGDVDMDTGNDSDGGRRKRMKSEGDSDSEEDRPLLPEEIELGRLMEKLDVDDPMRDSMIKQQQEKVDEAVAKLKRKMRKEKERKSRHERRYRKDGSRDRHRDHDKRKLKDADHDDHHSRRPRRKDDRSRSRDRESDNGRRQRKPRHRDDSEDRDRRRHRDRSREPRDHSNDGHVTDRDHRRRRHSSDSLDGRKPTSKRSPSPYRKRSPR
g1159.t1	MMAHLTRQEVLDSGTVSQTYKAAFDSRPVDISGTDISGWRTSRAEHLQKLRQFYPIPGPIPHLVTESLHDVPTRDSTSIRVKVYQPVKGEPKDGSPLIMMYHEGGWMMGDLTDEDLNCRMFARDLGAVCVNVEYRLAPEHKFPTGVNDCYDALKWAVANAKTLGADPGRGIIVGGASAGGNIAAVLALLARDEKLDPPITGQYLCVPALLPDTNVPPCLAHLYESRLMNIYDPVLKGGLQPGSVEPIYEPDLTSPLWDPFSHPDGHKGVAKAFFQVGGLDPLRDEAVLYDGKLREAGVLTRFELYSGYGHMFWTNYPELEESSKFVEDALKGLKWLLEDTRGSEEDTR
g1160.t1	MLARASSDASARLRRSKSTSTVHRHAPPIIEPFDPNVAQQHALAAATAAFARSQAQETIERKSTRSVELSRSKSTASRKSFKSQGSHFPPRELSIRTIPTRNDTKTVSSHPLFRGAGSNTEKSFAFNPTPSSERPSSLPRPLSAQPSITSGEHAHPASQPKPNRQSAASSITSQQIRKARSMYYASSVQTGSPIARPPAQFLTTPPSTSVNPALSTTPAVYVPTRITAPSPLAVPRFPVAVALDDTIDKARDKYLQDFQQRSIKHKPSLFLAPFKKRQEKSKDKVKRMSSTTPILSTTYQATEDPAIDIAVSDFMPKPDAKDGRSFSGSLKRKIKRVFRRSSNKSASLPVQQIEASREYFGAMNPDDILSQMNGLTEIPRPDDTLLQSVRSRTPSLEGS…
g1161.t1	MTPQTVDSPRASSEEEGLPFLAHTTAVGEKKKPWVIMVVLAFALVAIIDMGAFLAEAPRTRVYEANICLRYYRENDPSVVGVDGAILEKLCKVDAVQQEMAMIFGWQEMFDAIPSIFLAIPFGVLADKVGRKWIFTASLMGLQLNSAWVLGICYFKDLPLQLTWLSSVFYFIGGGPIVAAAIGITMISDIAPPEKRTTIFLYLTASVLIAEIVAPIMSARLMESGDWYPLVLALIFQQAGVLLAVFFPETLHMREEPKHEQTNTRVVQTPATSHAFSPGQQLRHFQDAFQFLKSDRTLALVVFTFMANRLGRQGMTLLVRYASKRYGWEIKQAAYLLSFRAATNLAAVAIFLPLANFVLLNYIRLPAHWADLWIARGSIVLTAISFLVIGLAAHPAILI…
g1162.t1	MIVINFMRFPGEIRNTIYNSIIRELPRTTAGTSLPAIAYTSILIHQEFMSQYLPQIQFDIMSMSDIWHMHTVLDNHPLDLGWRRITGLTITNFTAIAHTQTRANEVMDFLYQFISLENLIIDVTFYDLNHGFQGRIKTINHIFTEFELFRLLSFTSLKSLVINVKCNGLSPTPGSIALLSHLEDVLKFDTGVRVTLILCE
g1163.t1	MFRAARKIPTGGRAFLPVQIVASLDASAPAFAPPPSQAQAFEALLASGFARVSITAEREYPAAAPGCPAFLKGVRFDSTNLKKWYEEVLPHLAKCTFIVSSTADVTYGGSIFGSTALPHIYNAVTKVELPKFYWFSGVALNRHHNPYLQMCRNLPNLRELCLTIQTAGLTSQRWPERQIVALERTNPEAAKERIVLSVREAVHRYELDALFACTSLRLLRLEYIESAMTAYFCRVGNPVDVLQKLKVYLARGFAQRGLEVAVNLARVD
g1164.t1	MALLDVIGCVFRSPTSLLLFTAALVSLFVIVHTFFIRRLPTDAPNAASDNYPVTGPWGFWTERWEWYRRRRDQSTTGNFSFHAGPNTIVALAGEESRKLFFESRELGFAEGYAILFGVAPATEKYDSEQRAEEDISNHFSRRLAALLKNDQFRRKLSTLTSDMQEAINAIKNDPSGRTNPFESIYRAVFQLTMRVVGAHEIADNPKLLEETLNLFEYIEASTTATSIILPKFPSPAVLKRTYAGARLYMIIENIVKRRAASDEKHDDALQYLLDQGDRTHKIVEFIVGALFAGLLNSGINAAWVLCYLATSAEWLTKARDEVCAVAAKYARNPTAPLRYQLDDVPLEAWETDFPIVDLCLKDSIRINLLGTAFRKNISGQPLPTGKGMEVIPPNAVVTY…
g1165.t1	MSGKNEQGKMDVTQKNVFNAPLHQHSSTSNTHVTGYSSGMCSSEMPLALSLTSSFLDWSQQQGTDLRKSGIKEGARLCAYVNTWKAALDGGIDNVPKVKLEATHHHALDLVSMDVLKKYAAEQDNRRAESRVVLPKEGKQSIARESKEIGGKEPRA
g1166.t1	MGEFKLSATLRGHEDDVRCVAFPSPASIVSASRDSTVRLWKQESSAPPTYDSTILKTHGKEFVNSLAIVPSSSPFPEGLVVSGGKDQIIDVRQPSKGIEDNADALLIGHGNNVCALDVSQDGKYIVSGSWDMEARVWEVGKWGESTTLEGHGASVWAVLAYNSNTVITGCADKQIRFFHPSGKQLRSIQAPEVVRALCRLPQNHPSGAHFASAGNDAVVRLWTLQGKQVAELHGHENFIYSLAVLPNGGLVSAGEDRTVRVWENNECVQTITHPAISVWTVAVCPENGDIVSGASDKLVRIFTRDQARYAAPTEIEQFNEDVKGSSIPQQTVGNINKEQLPGPEFLTQRSGTKEGQVQMISEANGNISAYQWSAAANEWVNIGTVVDSAGSGGRKISHN…
g1167.t1	MDSPTVELRSALASLFECGKYSDLTIVCGSKRYPVHRALLATRSKFFEGACRGGFQESLTGVIDLTEDDAEAVEHMVHYLYHLDYLNKPLSRQSSQRSTRPGSPPAMTSRFSRPNPPKKLNLAFMEDPLLAQASAASPLMPLTPPSEESLFQPLDASLKLPDTPMADQFADDLIESVTLEPEVDAESAHLVTHAKVYAIAEKYGIAGLKSLARSKFSYQISTHLESPEFADACQEAYETTFHTDRGLRDVIIQTFRANPDLSMRADVETMVRETSCLAFELFRMASGLPVSS
g1168.t1	MLDHDLDIEHSAHSDQFSPDHKPILEPQLNVGGHGATQRRLQNYHVTMIGFCSGIGTGLFIGTGSAYANAGPAGLLLAYIIVGSVLWCVMQSVAELATVIPTAGSFPHFASRFIDPAVGFSLAISYGYCYTISIAAECSASAILVGYWTDLTPAVVITISLVLILGINLLSVRWFGESEVVAGAIKVACFLGLVVASIVITSGGAPNGETIGFRYWHSPGAWVDYNGITGPTGHFLGFLAAFVNASFSFIGVEVVVITAAESINPHKAIPRSATNVTYRIALFYVLGALLIGIIVDPTNPGLVSGSGNANSSPWVIAIKQAGITALPSIVNACILISAWSAGNSYCWVGSRIILAMTTDHQLPQFFGRTWKNGVPYVAVFAAWIFGPLAYLSLGTGGAA…
g1169.t1	MQKFDYKVALARDGQEALDYLCRTSGKPCPDMVFVDCMMPVVDGYEATSRIRKDVEMFDKQTRALPIVALTASALQRERDRCWDAGMNDCIGPLVTLRELKAAVLKWTSSESTGS
g1170.t1	MQSVLGKVIGPKEVHPENLDGRVAVVTGGALGIGYEVSRALALAGVKVIMVNRKEEQGTDAIETIRKEKSDAQVEWKHCDMGNLNEVKNVFTEIRNSLDRLDFLVLSAGINTNQYGTDADGIDRHFGVNWLGHFYVCNQLWPLLRKTGKLGEKPAPRVVFEASEMHRTAPSNVHFASLDELNNPDIGPTQLYGRTKLAMILGAKYGLRDRVIKPNSDNVYALSVHPGAVNTAMQQQWKDAYPGITGVLLTNAMLTIGRSPEQGSYSALWALTDPSIEEKDLNGYYFADPGQPGKETAQASDPALGAALWDLSTRLVKEKVGDDALLDWNAEGKKN
g1171.t1	MAPATAVLKPLLGTLAGIVGIYAAFISLLTIPTLQDHVIYLHRVTLTWFQDVNVPEQWGFLRNQVTPFHLKTPDGETLHAWHILPLETYRQHQDELRDEPTGLCEDVEKRLSFNLLKDDPTAQLVVYLHGAAGTLGSGWRPQSYRALSAASTNVHVLVIDYRGFGTSTGWPSEAGLLTDALTLVDFATQTAGVPPERIVVFAQSIGTAVALSLTHHLATQSPPVLFAGTVLVAPFADVASLTKTYKVAGTIPLLSPVALFPRLLTLLNHFIVSKWPSQEKLAALVRHLDSTRIQGRTCKYDITLIHAEDDYDIPTVHSDVLFWHAVNATLDTESSVTFEDLERRKVVERVPLGAGGWEMDWRGEGGVVREQIVKHGLHDRIMSYPVVSLAVARAFHSQD…
g1172.t1	MNASYVPLSSFLVICVLLSRSLASAGSVNACSFQSDELARNASSARVTAWVEQPNFRGTFDILWTCLVTIGISTYTMLCLNIPAPKDTYLQLVGRRTLWMILGIMGPEFVLTYAAGQWSRAKWSVKAFKESGYHKWHMRQAFFADMGGFVFHPRDGDPFPLNATQLHWLIRHQYVDFPSVTKREIWDNSKQDTFAKVITAFQVSYLIIQCAARAAQGLTITTLELNALAIVVCSLMTSYAWLHKPADVHSPIHIHSPKTLDEIKGNQDWDLTPLDFVDENGPGYSVNIQPFINMPVIPAERPIQRIPNDRFPTNPYGIQEYLLCLATLLFSGIHVAGWNFDFPTATERTLWRISSLLLFGITAAFWLFETIASWTRLGRWRMVWLYLFNRGGLEKHRAG…
g1173.t1	MAYNQPPGGYGQPPYQGQPYGQQPQYQQGPPQGYGQPPMQNQQYPPQGQYGAPPPQQQWGQPPPGQYGAPPPNQYGAPPQGQYGAPPPQQHQQQQWGQPPAPQGQYGAPPPGQYGAPPPGQYGAPPPGQYGAPPPPGQYGAPPPQGQYGAPPQQQQYGAPPPGQYQPPPQQQQYGPPNQPSLGYGPQQTANIDVSRDVEVIRKAMKGFGTDEKALILTLSKKDPIQINTIRTQYDQRLKRNMVNDLEKETSSYFKEGLVEIARGPLMSDCHNLFNAMKGMGTKEAILDDILINRSNADINAIKQQYQVLFKKSLETDLRGDLSAGTEQMYVMITAARRAEDSHPVIPQEIEQAVTDLQAGIGNMVSKNAAQVCQILTSKNDAQLRAIAQSYQQRFHKDL…
g1174.t1	MEVKDICSGVQTLQDQLHSAPLTLTCSEAGPSISVEKRNLQDGSHQDQPHTTSSSKTGSAFVAKTQGLLYITENSIAQVAKTDLLIAYRLFYPEDFTMSSYGSAHSGHLHPGFQPASQQQRARSQSNPPYPTTPASASYPQQQQGSYFPQPPTAPYQQPPSTSNPIAIPTSNRRRSSGYTHGHGTSPLYPPPSSPYSNSYPVQHLAPILQQQPIPENYQYSPPSQPAVMSGSPTHHHHRRRRSSSSAYGYDPRQSYESARSYQSAHAYHDYPPQHSQIGYGNYDDRYNYGNGNEGQASVYPDPMPVKEYGDWDKKEVSKYHKNRDLERRPTLGGSLMSLVRKGGMKLNGERR
[truncated: 10,083 more rows]

## Sheet: CAZymes dbCAN HMMdb release 8.0
Gene ID	HMMER	Hotpep	DIAMOND	Signalp	# of Tools
g3507.t1	AA1_2(138-506)	AA1	AA1	N	3
g10010.t1	AA1_2(38-385)	AA1	AA1	Y(1-19)	3		predicted as CAZymes by at least two prediction tools on dbCAN webserver
g1489.t1	AA1_2(40-375)	AA1	AA1_2	N	3
[truncated: 647 more rows]

## Sheet: Secondary metabolites antiSMASH
Region	Contig	start	end	Length (bp)	Type	No. of genes in cluster
[truncated: 26 more rows]

[truncated: 3 more sheets: Effector Candidates, Effectors_fastaA, Repeat and TE sequences]
